# Supplementary material for: Adjunctive phage therapy improves antibiotic treatment of Ventilator-Associated-Pneumonia with Pseudomonas aeruginosa
Source: Research Square preprint supplement (doi:10.21203/rs.3.rs-5017709/v1), 2024-09-26
Supplement: Supplementary file 1 [file d2efa33b16c34aeda2abbaaf.xlsx]

## Sheet: Figure 1 
											Control						Meropenem								Phages							Combination
							Figure 1b	Clinical Score		4 hpi	6	7	7	6	6	7	6	7	7	7	8	7	7	6	5	6	7	8	5	8	6	6	7	8	7	8	7	7
										16 hpi	7	8	7	8	4	7	7	8	4	8	8	7	3	5	7	6	2	4	3	4	3	6	6	2	2	3	5	4
										24 hpi	7	6	4	6	4	6	4	4	1	3	4	3	0	5	1	3	1	1	2	3	2	0	0	0	1	1	2	1
											Control						Meropenem								Phages							Combination
							Figure 1c	Body temperature (°C)		4 hpi	30.2	27.5	25.2	27.8	29.4	30	25	27.9	26.3	26.6	25.8	27	29	32.7	30.2	28.6	28.1	28.8	31.5	29.6	30.7	26.3	25.6	26.6	30.3	28.9	29.2	27
										16 hpi	22	21.5	21.7	23.3	31.5	23.9	21.4	21.3	35	23.5	25.2	24.2	35.3	31.8	22.6	22.4	36.7	35.4	36.2	35.5	34.1	22.2	22.9	35.9	36.3	37.3	26.9	34.2
										24 hpi	34.5	33.6	35.6	34.6	35.3	35.4	33.3	35.7	36.7	35.5	33.9	35.7	36.7	37.4	36.3	35.9	37.3	37.2	37.3	36.9	36.7	36.2	36.4	37.3	37.3	37.2	36.2	36.5
											Control						Meropenem								Phages							Combination
							Figure 1d	Body weight (%)		4 hpi	100.47	102.28	100.23	99.03	100.45	101.01	101.88	96.57	95.1	99.52	100	97.58	98.99	99.74	98.2	98.57	98.56	98.99	100.93	100	100	100.26	100.94	100	98.06	97.32	98.05	99.76
										16 hpi	101.41	98.73	99.3	96.62	97.75	98.48	100.54	94.12	95.1	97.62	97.86	95.17	97.49	95.61	95.63	97.14	97.12	94.95	98.13	91.89	96.95	100.26	99.06	97.89	94.66	94.39	95.86	94.89
										24 hpi	95.53	96.71	95.34	93.72	95.95	93.43	97.85	90.69	95.59	95.24	94.65	92.75	96.98	89.92	95.12	94.76	92.79	93.43	92.06	89.86	91.08	95.63	96.71	95.26	92.23	94.39	93.19	90.27
											Phages							Combination
							Figure 1e	PFU per tissue sample (log)		BALF	125000	175000	7500	93300	60000	41700	2000	100000	167000	30000	16700	16700	2880	15800
										Lung	158000	142000	62500	308000	88300	93300	16700	192000	325000	108000	42500	50000	24200	30800
										Blood	142000	933000	7170000	24200000	6170000	10000000	1170000	12500000	21700000	208000	1030000	250000	200000	5500000
										Spleen	6420000	5830000	8580000	5830000	2750000	1670000	1250000	4250000	1250000	7500000	750000	4080000	2750000	417000
										Liver	5670000	33300000	24200000	10000000	5580000	4500000	1670000	6670000	4250000	4170000	842000	7830000	4330000	1500000
											Control						Meropenem								Phages							Combination
							Figure 1f	CFU per tissue sample (log)		BAL	10400	88000	4200	1400	2460	17000	10	20	10	20	20	10	10	10	200	200	100	200	60	180	380	10	60	120	10	10	20	10
										Lung	2600	18400	15800	2800	840	3200	200	320	20	440	260	240	60	10	1800	720	200	400	160	240	240	200	300	10	20	20	60	10
											Control						Meropenem								Phages							Combination
							Figure 1g	CFU per tissue sample (log)		Blood	10	10	10	10	10	10	10	10	10	10	10	10	10	25	10	10	600	10	10	10	10	10	200	33.3	10	10	10	10
										Spleen	10	200	62000	400	10	10	10	10	40	10	10	10	10	10	10	20	10	10	10	60	60	10	20	10	10	10	20	10
										Liver	220000	6400	48000	288000	1120	200	20	10	10	10	300	20	60	360	10	1000	80000	10	10	2800	400	10	10	10	10	10	80	10

## Sheet: Figure 2
											Control						Meropenem								Phages							Combination
							Figure 2a	IL-6 (pg/mL×103)		24 hpi	2681.63	3707.16	2302.3	2123.07	474.11	676.92	1826.72	1215.15	374.96	2413.89	863.3	1190.76	184.72	187.34	1032.41	1061.77	0.81	569.56	62.43	391.56	192.78	599.16	1098.87	1178.83	332.18	134.6	258.92	409.74
								BALF
											Control						Meropenem								Phages							Combination
							Figure 2b	PMN (%)		Lung	59.83	56.79	57.33	63.19	72.99	64.39	60.41	64.67	62.02	70.78	62.81	70.16	42.71	39.39	60.3	65.21	60.05	34.1	38.45	49.3	55.94	60.74	59.62	54.75	55.26	56.54	61.87	68.43
										BALC	89.63	90.42	85.17	87.49	78.85	87.77	90.81	88.6	87.35	83.85	85.16	85.64	81.76	71	87.03	90.5		64.53	84.59	80.06		81.43	85.93	77.46	83.51	87.15	80.21	85.96
											Control						Meropenem								Phages							Combination
								alvM (%)		Lung	4.01	2.62	2.73	2.81	2.48	1.72	3.28	2.82	1.11	1.41	2.27	1.67	3.97	6.8	2.91	2.87	0.96	3.11	2.54	3.15	3.48	3.06	3.78	1.67	1.94	2.55	3.53	1.42
										BALC	2.24	2.01	6.37	7.79	11.27	5.86	5.85	6.64	4.76	3.04	6.49	8.33	9.72	6.56	6.93	3.77		10.62	10.61	17.19		10.67	8.79	10.55	8.99	8.14	15.81	5.66
											Control						Meropenem								Phages							Combination
							Figure 2c	Leucocytes (× 105 cells)		Lung	3.08041e+06	3.92783e+06	2.83402e+06	2.7401e+06	3.65159e+06	4.31541e+06	2.53919e+06	3.73037e+06	3.84389e+06	4.69945e+06	3.25882e+06	3.65774e+06	2.8136e+06	1.67713e+06	2.80469e+06	3.42975e+06	4.08184e+06	1.93656e+06	1.61557e+06	3.9623e+06	2.88911e+06	3.44558e+06	1.91982e+06	3.9713e+06	3.92958e+06	4.4732e+06	3.32086e+06	6.8494e+06
										BALC	381944	752162	296315	357136	109442	189004	282440	309524	324351	380734	255066	261231	156301	153687	290164	476790		105452	257565	289693		181694	347529	165722	216981	222764	217077	332953
											Control						Meropenem								Phages							Combination
								PMN (× 106 cells)		Lung	1.84288e+06	2.23064e+06	1.62467e+06	1.73151e+06	2.66512e+06	2.77869e+06	1.53405e+06	2.41234e+06	2.38403e+06	3.3263e+06	2.04694e+06	2.56619e+06	1.20181e+06	660608	1.69131e+06	2.2365e+06	2.451e+06	660363	621109	1.95351e+06	1.61626e+06	2.09282e+06	1.14468e+06	2.1744e+06	2.17157e+06	2.52902e+06	2.05448e+06	4.68699e+06
										BALC	350834	697900	259581	313536	86713.4	166174	248604	275176	284497	322419	218244	225006	128541	130671	250622	432414		84090.9	218302	232852		147781	299316	129798	181552	193834	174886	287714
											Control						Meropenem								Phages							Combination
								alvM (× 105 cells)		Lung	123571	102894	77324.4	77130.4	90562.9	74092.5	83410.6	105016	42547.3	66272.7	74067.9	61166.3	111747	114000	81534.6	98597.6	39351.1	60276.4	41078.1	124655	100617	105502	72608.4	66147	76108.4	114194	117360	96982.7
										BALC	8753.79	15530.8	19421	27925	12390.1	11100	16017.4	20611.2	15515.6	11706.7	16621.6	21873.5	15288.2	12069.1	19956.3	18004.8		13833.8	27375.9	49988.4		19367.5	30634.2	17672.3	19552	18093.6	34470.4	18932.1
							Figure 2d	PMN (%)			Control	Meropenm	Phages	Cobination
										Lung	64.39	64.67	60.3	60.74
										BALC	87.77	88.6	87.03	81.43
								alvM (%)			Control	Meropenm	Phages	Cobination
										Lung	1.72	2.82	2.91	3.06
										BALC	5.86	6.64	6.93	10.67

## Sheet: Figure 3
											Control						Meropenem								Phages							Combination
							Figure 3a	IL-6 (pg/mL×103)		24 hpi	589.75	548.61	188.4	129.33	178.76	174.7	264.28	53.43	16.85	99.61	67.95	37.98	16.85	40.46	75.71	84.6	16.85	16.85	16.85	16.85	73.19	16.85	79.99	16.85	16.85	16.85	36.84	41.79
								Plasma
											Control						Meropenem								Phages							Combination
							Figure 3b	Permeability Index		24 hpi	1.422	1.753	1.192	1.865	0.577	1.26	1.788	1.527	1.398	1.674	1.728	1.688	0.537	0.561	0.943	1.076	0.087	1.049	0.466	0.709	0.657	0.812	0.938	1.125	0.551	0.416	0.582	1.205
											Control						Meropenem								Phages							Combination
							Figure 3c	ALT (U/I)		24 hpi	65.2	49	67.8	132.8	33.8	54.4	75.6	43	45.2	29.6	41.4	37.8	53.4	52.2	45.6	39.2	36.6	31.6	37.2	32.4	45.6	43.8	51	33.4	29.4	28.8	48.2	33.8
								AST (U/I)		24 hpi	176.6	127.4	197.2	210.8	89.8	106.8	186.3	128.2	203.4	99.2	112.6	93.8	100.4	110.2	151.2	110.8	88.8	87.2	76.4	79.8	99.8	111.4	122.4	91.6	74.2	73.8	225.2	104.4
								Urea (mmol/L)		24 hpi	14.6	15	15.6	13.2	8.2	10.2	14.7	10	7.8	12.6	13	10.8	6.8	10	20	10.4	3.4	6.4	3.6	6.8	5.8	12.2	9	6	4.6	4.6	9.2	8
								Triglyceride (mmol/L)		24 hpi	1.5	0.8	0.44	0.7	0.58	0.66	0.75	0.46	0.44	0.44	0.5	0.6	0.6	0.48	0.48	0.44	0.76	0.48	0.6	0.44	0.52	0.58	0.38	0.5	0.48	0.16	0.58	0.84
								Bilirubin total (µmol/L)		24 hpi	0.05	0.6	0.6	0.6	1	1	0.3	0.05	0.2	0.8	1.8	1.2	0.4	0.05	0.4	0.4	0.05	0.05	0.05	0.05	0.05	0.4	0.8	0.6	0.2	0.05	0.8	0.2

## Sheet: Figure 4
											Infection control						Meropenem 0.5 µg/mL						Meropenem 5 µg/mL						Phages MOI 0.005						Phages MOI 0.5						Combination + (Meropenem 0.005 µg/mL, Phages MOI 0.005) Combination + (Meropenem 0.005 µg/mL, Phages MOI 0.005) Combination + (Meropenem 0.005 µg/mL, Phages MOI 0.005)						Combination ++ (Meropenem 0.05 µg/mL, Phages MOI 0.05)
							Figure 4b	CFU/mL (log)		4 hpi	7.14922	5.60206	5.81954	7.01703	6.25527	6.80618	4.5977	5.26951	5.52892				3.62325	4.05308	3.96379				3.38021		4.8293				2.41497	1	1				2.60206	4.97864	5.04532				1	3.62325	3.43136
										8 hpi	9.25285		7.63347	9.14301	8.07918	7.90309	3.57978	4.30103	4.72428				3.25527	2.95424	3.20412				4.41996	2.49136	2.83251				4.26482	2.82607	3.36173				3.50515	2.30103	2.6721				1	2.30103	1.30103
											Medium control						Infection control						Meropenem 0.5 µg/mL						Meropenem 5 µg/mL						Phages MOI 0.005						Phages MOI 0.5						Combination + (Meropenem 0.005 µg/mL, Phages MOI 0.005) Combination + (Meropenem 0.005 µg/mL, Phages MOI 0.005) Combination + (Meropenem 0.005 µg/mL, Phages MOI 0.005)
							Figure 4c	IL-6 (pg/mL)		4 hpi	177.13	95.89	91.04	117.25	93.31	122.82	247.2	99.9	121.68	201.36	120.86	154.09	199.05	100.8	100.57				179.81	95.97	103.92				277.2	103.23	102.98				228.3	111.85	110.62				156.48	104.67	139.7
										8 hpi	272.5	143.6	131.2	172.95	122.65	241.4	186.35	378.1	1648.5	448.05	1351.7	687.5	1798	232.4	262.75				1123.15	193.55	241.85				1939.5	269.85	460.9				766.25	255.95	301.75				1890	318.9	500.65
											Medium control						Infection control						Meropenem 0.5 µg/mL						Meropenem 5 µg/mL						Phages MOI 0.005						Phages MOI 0.5						Combination + (Meropenem 0.005 µg/mL, Phages MOI 0.005) Combination + (Meropenem 0.005 µg/mL, Phages MOI 0.005) Combination + (Meropenem 0.005 µg/mL, Phages MOI 0.005)
							Figure 4c	IL-8 (pg/mL)		4 hpi	826.35	912.25	800.5	833.45	907	1005	1281	940.1	1042	1471.5	1124	1194.5	1186.5	906.7	918				1111.5	868.35	900.55				1238.5	955.45	986.7				1027.2	1048.65	928.55				1174.5	984.9	1076.5
										8 hpi	1188.65	1219.44	1016.63	1205.62	1135.73	1564.04	7215.96	2152.25	5289.44	7867.64	4352.81	3200.67	5193.03	1525.28	1651.8				4135.51	1425.06	1499.78				5112.36	1707.53	2203.93				2739.1	1671.46	1699.33				5451.69	1901.57	2364.83
											Medium control						Infection control						Meropenem 0.5 µg/mL						Meropenem 5 µg/mL						Phages MOI 0.005						Phages MOI 0.5						Combination + (Meropenem 0.005 µg/mL, Phages MOI 0.005) Combination + (Meropenem 0.005 µg/mL, Phages MOI 0.005) Combination + (Meropenem 0.005 µg/mL, Phages MOI 0.005)
							Figure 4d	LDH release (%)		4 hpi	59.2	61.99	63.81	42.16	60.91	56.54	54.03	60.71	62.17	38.7	56.67	62.44	45.56	58.06	60.27				44.19	57.35	58.14				49.19	53.57	60.2				40.11	53.41	56.95				37.35	54.19	54.72
										8 hpi	52.97	63.79	66.08	40.93	61.41	58.63	55.15	63.7	65.6	49.81	58.55	66.21	42.55	59.45	59.35				34.31	58.27	57.95				51.2	55.1	60.32				59.32	55.64	58.57				39.32	54.91	54.98

## Sheet: Figure 5
											Untreated Control			Phages MOI 0.005			Phages MOI 0.05			Phages MOI 0.5			Phages MOI 5			Meropenem 5 µg/mL			Meropenem 50 µg/mL			Combination ++			Combination ++++
							Figure 5b	CFU/mL		0 min	20000000	20000000	20000000	20000000	20000000	20000000	20000000	20000000	20000000	20000000	20000000	20000000	20000000	20000000	20000000	20000000	20000000	20000000	20000000	20000000	20000000	20000000	20000000	20000000	20000000	20000000	20000000
										15 min	44000000	38000000	28000000	27800000	35800000	30000000	12060000	12660000	27000000	540000	1000000	240000	6000	2600	3000	12000000	7000000	6220000	3180000	6600000	4000000	11400000	18600000	6600000	140000	3780000	60000
										30 min	50000000	46000000	62000000	18000000	21800000	18000000	240000	82000	54000	300	120	180	80	60	40	7600000	6800000	5600000	1300000	3000000	600000	28000	3000000	22000	20	20000	740
										45 min	66000000	78000000	108000000	44000	8000	1000	6000	240	80	100	160	80	20	140	100	7600000	5400000	3580000	540000	660000	540000	40	120	40	40	80	20
										60 min	128000000	152000000	242000000	10	200	200	160	160	280	100	200	140	180	180	200	2800000	3800000	2620000	720000	880000	460000	40	20	40	10	10	10
										120 min		16800000000	40800000000	200	1000	600	620	600	800	300	560	720	220	460	420	940000	560000	540000	340000	160000	240000	40	80	20	10	10	10
										180 min		21000000000	50600000000	1400	3800	2600	2200	3000	2440	840	2400	1820	760	2280	1380	112000	160000	120000	20000	44000	20000	20	80	20	10	10	10
											Untreated Control			Phages MOI 0.005			Phages MOI 0.05			Phages MOI 0.5			Phages MOI 5			Meropenem 5 µg/mL			Meropenem 50 µg/mL			Combination ++			Combination ++++
							Figure 5c	Free endotoxin (EU/mL × 103)		15 min	2.49	2.13	2.04	4.21	2.83	1.37	1.81	1.73	1.9	4.69	4.75	2.86	7.25	6.28	3.42	5.01	1.76	2.55	6.45	9.63	7.25	4.43	4.6	1.64	3.84	6.37	2.57
										30 min		3.09	4.2		3.75	3.62		6.16	6.85		9.36	7.8	7.19	9.71	11.41		7.39	10.15	7.93	9.18	9.05	5.47	6.18		7.52	10.59	14.2
										45 min	5.16	3.5	3.32	6.78	6.83	8.08	7.89	8.41	7.54	7.8	10	9.2	7.43	10.96	7.89	7.87	9.57	7.66	7.78	10.08	8.66	8.08	9.27	8.7	7.84	10.58	10.62
										60 min	6.01	5.28	7.16	7.98	10.74	15.73	8.22	11.31	16.24	8.13	11.42	14.05	8.01	10.19	13.7	7.97	11.36	14.62	7.74	10.77	14.39	7.99	11.26	13.42	7.88	11	16.44
										120 min	7.65	6.37	7.76	8.2	11.42		8.18	10.87		8.12	11.66		8.11	10.83		8.07	11.71		7.99	9.22		8.02	11.19		8.14	8.83
										180 min	7.85	10.35	17.3	8.23	11.99	18.03	8.09	11.95	17.63	8.19	11.64	17.45	8.19	11.23	16.4	8.07	11.19	16.04	8.04	11.01	16.1	7.73	11.53	17.52	8.02	11.33	16.76

## Sheet: Figure 6
							Figure 6b	LPS																	Figure 6c	Meropenem 50 µg/mL																	Figure 6d	Phages MOI 5
								Normalized Resistance (900 Hz)																		Normalized Resistance (900 Hz)																		Normalized Resistance (900 Hz)
								Time (h)	Untreated Control				1 µg/mL				2 µg/mL				5 µg/mL					Time (h)	Untreated Control				15 min				45 min				120 min					Time (h)	Untreated Control				15 min
								0	1	1	1	1	1	1	1	1	1	1	1	1	1	1	1			0	1	1	1	1	1	1	1		1	1	1		1	1	1			0	1	1	1	1	1
									0.998	1.001	1.001	0.999	1	1	1.002	0.999	0.999	1	0.999	0.999	1.002	1.002	1				0.998	1.001	1.001	0.999	1	1.003	1.001		0.999	1	0.999		0.998	0.999	0.997				0.998	1.001	1.001	0.999	0.999
									0.996	1.008	1.001	0.999	1.001	1.003	1	1.001	0.998	1.002	0.997	1	1.006	0.999	1.002				0.996	1.008	1.001	0.999	1	1.003	1.003		0.999	1	0.999		1.001	0.998	0.996				0.996	1.008	1.001	0.999	0.998
									1.006	1.026	1.012	0.995	1.003	1.005	0.997	1.006	1.002	1.003	0.994	0.999	1.014	0.998	1.006				1.006	1.026	1.012	0.995	1	1.003	1.01		1.006	0.999	0.995		1.014	1.007	1.007				1.006	1.026	1.012	0.995	1
									1.004	1.042	1.024	0.986	0.986	1.002	0.99	1.008	0.987	1.001	0.986	0.991	1.017	0.995	1.005				1.004	1.042	1.024	0.986	0.952	0.987	0.983		1.01	1.033	0.996		0.9	1.023	1.013				1.004	1.042	1.024	0.986	0.956
									1.014	1.044	1.03	0.975	0.978	0.998	0.984	1.005	0.98	0.996	0.978	0.985	1.013	0.993	1.003				1.014	1.044	1.03	0.975	0.943	0.975	0.964		0.957	0.99	0.964		0.906	0.948	0.935				1.014	1.044	1.03	0.975	0.944
									1.006	1.036	1.029	0.978	0.973	0.99	0.986	1.004	0.975	0.99	0.978	0.986	1.003	0.993	1.001				1.006	1.036	1.029	0.978	0.938	0.962	0.95		0.947	0.973	0.95		0.909	0.921	0.949				1.006	1.036	1.029	0.978	0.936
									1.003	1.022	1.023	0.979	0.972	0.988	0.983	1.003	0.976	0.991	0.976	0.985	0.998	0.988	1				1.003	1.022	1.023	0.979	0.933	0.952	0.94		0.944	0.959	0.938		0.912	0.932	0.965				1.003	1.022	1.023	0.979	0.928
									1.003	1.016	1.015	0.977	0.977	0.985	0.981	1.002	0.98	0.988	0.974	0.983	0.99	0.985	0.999				1.003	1.016	1.015	0.977	0.929	0.945	0.931		0.938	0.947	0.928		0.913	0.938	0.975				1.003	1.016	1.015	0.977	0.923
									1.003	1.012	1.014	0.974	0.978	0.979	0.984	1.002	0.982	0.983	0.975	0.986	0.982	0.987	1				1.003	1.012	1.014	0.974	0.924	0.938	0.923		0.932	0.936	0.919		0.914	0.939	0.978				1.003	1.012	1.014	0.974	0.917
									1.001	1.007	1.012	0.971	0.981	0.973	0.986	0.999	0.983	0.977	0.975	0.985	0.974	0.987	0.994				1.001	1.007	1.012	0.971	0.92	0.934	0.918		0.929	0.927	0.912		0.917	0.937	0.979				1.001	1.007	1.012	0.971	0.913
									0.998	1.005	1.012	0.969	0.983	0.969	0.989	0.995	0.98	0.975	0.976	0.988	0.97	0.986	0.993				0.998	1.005	1.012	0.969	0.917	0.931	0.912		0.929	0.92	0.905		0.92	0.936	0.981				0.998	1.005	1.012	0.969	0.91
									0.996	1.01	1.012	0.968	0.982	0.967	0.993	0.999	0.979	0.975	0.977	0.99	0.969	0.986	0.996				0.996	1.01	1.012	0.968	0.917	0.928	0.907		0.931	0.915	0.904		0.923	0.938	0.989				0.996	1.01	1.012	0.968	0.908
									0.995	1.016	1.012	0.965	0.983	0.966	0.995	1.002	0.976	0.974	0.978	0.991	0.968	0.986	0.994				0.995	1.016	1.012	0.965	0.916	0.925	0.909		0.933	0.911	0.896		0.926	0.941	0.992				0.995	1.016	1.012	0.965	0.908
									0.994	1.019	1.011	0.966	0.985	0.964	0.992	0.998	0.975	0.972	0.977	0.988	0.966	0.984	0.99				0.994	1.019	1.011	0.966	0.916	0.923	0.904		0.936	0.906	0.895		0.929	0.944	0.997				0.994	1.019	1.011	0.966	0.908
									0.994	1.019	1.014	0.964	0.986	0.962	0.994	0.997	0.975	0.971	0.977	0.986	0.964	0.986	0.989				0.994	1.019	1.014	0.964	0.918	0.922	0.902		0.94	0.904	0.894		0.932	0.948	1.001				0.994	1.019	1.014	0.964	0.909
									0.994	1.017	1.014	0.96	0.988	0.962	0.993	0.997	0.975	0.97	0.977	0.985	0.963	0.983	0.987				0.994	1.017	1.014	0.96	0.92	0.922	0.903		0.944	0.903	0.895		0.935	0.951	1.006				0.994	1.017	1.014	0.96	0.91
									0.997	1.015	1.015	0.956	0.988	0.961	0.994	0.993	0.973	0.969	0.978	0.985	0.959	0.983	0.984				0.997	1.015	1.015	0.956	0.923	0.921	0.906		0.947	0.904	0.897		0.939	0.955	1.01				0.997	1.015	1.015	0.956	0.913
									0.997	1.014	1.016	0.955	0.987	0.96	0.994	0.993	0.972	0.969	0.979	0.988	0.957	0.982	0.981				0.997	1.014	1.016	0.955	0.926	0.922	0.905		0.951	0.904	0.898		0.942	0.958	1.013				0.997	1.014	1.016	0.955	0.917
									0.994	1.012	1.015	0.954	0.984	0.959	0.996	0.988	0.972	0.969	0.977	0.984	0.954	0.983	0.98				0.994	1.012	1.015	0.954	0.93	0.923	0.91		0.955	0.904	0.899		0.944	0.961	1.016				0.994	1.012	1.015	0.954	0.922
									0.991	1.011	1.014	0.954	0.98	0.96	0.996	0.985	0.972	0.968	0.978	0.984	0.952	0.984	0.978				0.991	1.011	1.014	0.954	0.934	0.924	0.908		0.959	0.905	0.901		0.947	0.964	1.019				0.991	1.011	1.014	0.954	0.926
									0.989	1.008	1.014	0.956	0.979	0.959	0.996	0.984	0.971	0.968	0.979	0.984	0.95	0.983	0.976				0.989	1.008	1.014	0.956	0.938	0.925	0.911		0.962	0.907	0.903		0.949	0.967	1.021				0.989	1.008	1.014	0.956	0.93
									0.988	1.006	1.012	0.956	0.976	0.958	0.995	0.981	0.97	0.968	0.98	0.985	0.948	0.982	0.974				0.988	1.006	1.012	0.956	0.943	0.926	0.912		0.966	0.909	0.907		0.951	0.97	1.023				0.988	1.006	1.012	0.956	0.936
									0.985	1.004	1.008	0.957	0.975	0.957	0.994	0.983	0.968	0.968	0.979	0.987	0.945	0.98	0.974				0.985	1.004	1.008	0.957	0.946	0.928	0.917		0.971	0.912	0.909		0.954	0.97	1.023				0.985	1.004	1.008	0.957	0.94
									0.984	1.001	1.008	0.958	0.975	0.956	0.995	0.98	0.967	0.965	0.98	0.985	0.944	0.98	0.972				0.984	1.001	1.008	0.958	0.949	0.928	0.919		0.973	0.911	0.911		0.956	0.972	1.025				0.984	1.001	1.008	0.958	0.944
									0.983	1.001	1.009	0.959	0.974	0.955	0.994	0.981	0.966	0.965	0.98	0.988	0.94	0.981	0.974				0.983	1.001	1.009	0.959	0.953	0.929	0.923		0.974	0.913	0.914		0.958	0.974	1.028				0.983	1.001	1.009	0.959	0.95
									0.982	0.999	1.008	0.961	0.975	0.953	0.996	0.98	0.964	0.963	0.98	0.986	0.938	0.98	0.972				0.982	0.999	1.008	0.961	0.957	0.931	0.926		0.977	0.916	0.918		0.96	0.977	1.027				0.982	0.999	1.008	0.961	0.954
									0.982	0.997	1.006	0.961	0.975	0.952	0.994	0.979	0.964	0.962	0.976	0.987	0.937	0.977	0.97				0.982	0.997	1.006	0.961	0.96	0.933	0.926		0.978	0.918	0.92		0.961	0.979	1.029				0.982	0.997	1.006	0.961	0.958
									0.982	0.996	1.01	0.963	0.974	0.951	0.995	0.974	0.962	0.96	0.98	0.988	0.935	0.977	0.966				0.982	0.996	1.01	0.963	0.965	0.931	0.932		0.981	0.918	0.923		0.963	0.978	1.029				0.982	0.996	1.01	0.963	0.961
									0.98	0.994	1.01	0.964	0.975	0.95	0.994	0.972	0.961	0.957	0.981	0.988	0.931	0.979	0.964				0.98	0.994	1.01	0.964	0.966	0.935	0.932		0.982	0.921	0.925		0.964	0.98	1.029				0.98	0.994	1.01	0.964	0.963
								1	0.98	0.992	1.01	0.966	0.975	0.948	0.995	0.97	0.961	0.956	0.983	0.987	0.931	0.981	0.962			1	0.98	0.992	1.01	0.966	0.968	0.936	0.935		0.982	0.924	0.929		0.965	0.982	1.03			1	0.98	0.992	1.01	0.966	0.967
									0.98	0.99	1.011	0.966	0.976	0.948	0.996	0.968	0.96	0.956	0.984	0.984	0.93	0.982	0.961				0.98	0.99	1.011	0.966	0.97	0.939	0.938		0.983	0.927	0.931		0.965	0.985	1.03				0.98	0.99	1.011	0.966	0.97
									0.978	0.987	1.008	0.967	0.976	0.946	0.993	0.967	0.959	0.955	0.984	0.983	0.928	0.978	0.961				0.978	0.987	1.008	0.967	0.972	0.938	0.94		0.984	0.926	0.932		0.966	0.983	1.031				0.978	0.987	1.008	0.967	0.972
									0.977	0.987	1.007	0.971	0.977	0.945	0.994	0.967	0.96	0.956	0.984	0.982	0.926	0.979	0.961				0.977	0.987	1.007	0.971	0.975	0.942	0.944		0.984	0.929	0.937		0.968	0.985	1.033				0.977	0.987	1.007	0.971	0.974
									0.975	0.986	1.007	0.973	0.977	0.943	0.996	0.968	0.961	0.956	0.986	0.981	0.924	0.979	0.962				0.975	0.986	1.007	0.973	0.976	0.943	0.947		0.983	0.932	0.937		0.969	0.987	1.033				0.975	0.986	1.007	0.973	0.975
									0.973	0.985	1.006	0.975	0.979	0.942	0.998	0.969	0.959	0.955	0.988	0.981	0.922	0.979	0.961				0.973	0.985	1.006	0.975	0.977	0.945	0.95		0.985	0.936	0.939		0.97	0.989	1.035				0.973	0.985	1.006	0.975	0.978
									0.972	0.985	1.005	0.974	0.981	0.941	0.998	0.967	0.959	0.953	0.989	0.98	0.92	0.977	0.958				0.972	0.985	1.005	0.974	0.979	0.948	0.954		0.986	0.939	0.94		0.97	0.99	1.035				0.972	0.985	1.005	0.974	0.979
									0.971	0.984	1.004	0.976	0.981	0.941	0.997	0.965	0.959	0.952	0.989	0.98	0.917	0.977	0.957				0.971	0.984	1.004	0.976	0.981	0.948	0.955		0.985	0.942	0.943		0.972	0.99	1.035				0.971	0.984	1.004	0.976	0.98
									0.97	0.983	1.004	0.976	0.981	0.94	0.998	0.965	0.959	0.949	0.99	0.979	0.916	0.978	0.957				0.97	0.983	1.004	0.976	0.982	0.951	0.958		0.984	0.944	0.945		0.974	0.992	1.037				0.97	0.983	1.004	0.976	0.981
									0.967	0.981	1.003	0.975	0.982	0.937	1	0.965	0.959	0.948	0.991	0.981	0.914	0.978	0.955				0.967	0.981	1.003	0.975	0.982	0.954	0.96		0.984	0.946	0.948		0.975	0.993	1.038				0.967	0.981	1.003	0.975	0.983
									0.966	0.979	1.004	0.974	0.982	0.936	1.002	0.964	0.958	0.947	0.99	0.981	0.912	0.977	0.953				0.966	0.979	1.004	0.974	0.983	0.956	0.962		0.984	0.948	0.949		0.976	0.994	1.038				0.966	0.979	1.004	0.974	0.984
									0.964	0.977	1.005	0.975	0.982	0.936	1.002	0.963	0.958	0.947	0.992	0.981	0.909	0.976	0.953				0.964	0.977	1.005	0.975	0.984	0.959	0.964		0.983	0.95	0.952		0.976	0.995	1.038				0.964	0.977	1.005	0.975	0.984
									0.963	0.975	1.004	0.975	0.981	0.936	1.001	0.964	0.958	0.946	0.991	0.982	0.908	0.975	0.952				0.963	0.975	1.004	0.975	0.984	0.957	0.967		0.982	0.951	0.953		0.976	0.993	1.038				0.963	0.975	1.004	0.975	0.984
									0.961	0.972	1.006	0.974	0.981	0.936	1.002	0.963	0.957	0.945	0.993	0.983	0.907	0.975	0.952				0.961	0.972	1.006	0.974	0.984	0.961	0.968		0.981	0.954	0.956		0.976	0.994	1.039				0.961	0.972	1.006	0.974	0.985
									0.96	0.971	1.006	0.975	0.982	0.934	1.003	0.962	0.956	0.943	0.991	0.985	0.906	0.975	0.951				0.96	0.971	1.006	0.975	0.984	0.963	0.97		0.98	0.955	0.958		0.978	0.995	1.04				0.96	0.971	1.006	0.975	0.985
									0.958	0.969	1.006	0.976	0.982	0.935	1.004	0.962	0.955	0.942	0.992	0.985	0.904	0.976	0.949				0.958	0.969	1.006	0.976	0.985	0.965	0.973		0.98	0.956	0.958		0.978	0.996	1.039				0.958	0.969	1.006	0.976	0.986
									0.956	0.968	1.008	0.976	0.981	0.933	1.005	0.963	0.954	0.94	0.993	0.986	0.902	0.975	0.949				0.956	0.968	1.008	0.976	0.986	0.966	0.975		0.98	0.96	0.961		0.977	0.997	1.039				0.956	0.968	1.008	0.976	0.985
									0.955	0.968	1.008	0.979	0.981	0.932	1.005	0.962	0.954	0.938	0.993	0.984	0.901	0.976	0.949				0.955	0.968	1.008	0.979	0.987	0.968	0.977		0.979	0.962	0.963		0.976	0.997	1.041				0.955	0.968	1.008	0.979	0.986
									0.955	0.967	1.009	0.98	0.982	0.93	1.008	0.961	0.954	0.937	0.993	0.985	0.899	0.977	0.948				0.955	0.967	1.009	0.98	0.987	0.97	0.978		0.979	0.962	0.964		0.975	0.998	1.041				0.955	0.967	1.009	0.98	0.985
									0.952	0.966	1.01	0.98	0.981	0.929	1.008	0.961	0.953	0.937	0.993	0.985	0.896	0.975	0.946				0.952	0.966	1.01	0.98	0.989	0.971	0.98		0.979	0.964	0.967		0.975	0.998	1.042				0.952	0.966	1.01	0.98	0.986
									0.952	0.965	1.01	0.979	0.981	0.928	1.008	0.962	0.953	0.936	0.993	0.984	0.895	0.973	0.947				0.952	0.965	1.01	0.979	0.989	0.972	0.982		0.978	0.965	0.967		0.973	0.998	1.041				0.952	0.965	1.01	0.979	0.987
									0.952	0.965	1.011	0.979	0.982	0.927	1.009	0.963	0.951	0.935	0.993	0.984	0.896	0.972	0.945				0.952	0.965	1.011	0.979	0.989	0.972	0.985		0.978	0.967	0.971		0.972	0.999	1.041				0.952	0.965	1.011	0.979	0.987
									0.952	0.963	1.01	0.98	0.981	0.926	1.009	0.963	0.95	0.934	0.993	0.984	0.895	0.972	0.944				0.952	0.963	1.01	0.98	0.99	0.973	0.986		0.979	0.97	0.974		0.971	0.999	1.041				0.952	0.963	1.01	0.98	0.987
									0.951	0.961	1.01	0.979	0.981	0.925	1.008	0.963	0.95	0.934	0.995	0.983	0.893	0.969	0.944				0.951	0.961	1.01	0.979	0.989	0.974	0.988		0.979	0.971	0.975		0.971	0.999	1.041				0.951	0.961	1.01	0.979	0.989
									0.95	0.959	1.01	0.976	0.981	0.923	1.008	0.963	0.95	0.931	0.995	0.983	0.891	0.969	0.944				0.95	0.959	1.01	0.976	0.99	0.976	0.99		0.977	0.973	0.977		0.971	1	1.043				0.95	0.959	1.01	0.976	0.989
									0.949	0.958	1.009	0.977	0.98	0.922	1.007	0.962	0.949	0.93	0.995	0.985	0.89	0.969	0.942				0.949	0.958	1.009	0.977	0.991	0.976	0.992		0.978	0.975	0.978		0.972	1	1.042				0.949	0.958	1.009	0.977	0.989
									0.949	0.957	1.006	0.981	0.981	0.921	1.003	0.961	0.948	0.928	0.992	0.985	0.889	0.966	0.94				0.949	0.957	1.006	0.981	0.99	0.977	0.995		0.977	0.976	0.983		0.972	1	1.042				0.949	0.957	1.006	0.981	0.99
									0.948	0.956	1.006	0.979	0.981	0.92	1.004	0.96	0.948	0.929	0.994	0.985	0.888	0.966	0.94				0.948	0.956	1.006	0.979	0.992	0.975	0.997		0.977	0.974	0.982		0.972	0.999	1.041				0.948	0.956	1.006	0.979	0.99
									0.947	0.954	1.006	0.981	0.982	0.919	1.004	0.959	0.948	0.928	0.994	0.986	0.888	0.965	0.94				0.947	0.954	1.006	0.981	0.992	0.977	0.998		0.978	0.977	0.985		0.972	0.998	1.04				0.947	0.954	1.006	0.981	0.991
									0.945	0.953	1.006	0.983	0.983	0.917	1.006	0.959	0.947	0.928	0.993	0.986	0.885	0.965	0.939				0.945	0.953	1.006	0.983	0.992	0.979	1		0.977	0.979	0.987		0.972	0.998	1.039				0.945	0.953	1.006	0.983	0.991
								2	0.945	0.95	1.006	0.982	0.982	0.917	1.006	0.957	0.947	0.928	0.993	0.984	0.883	0.965	0.94			2	0.945	0.95	1.006	0.982	0.993	0.979	1.002		0.977	0.98	0.989		0.972	0.997	1.04			2	0.945	0.95	1.006	0.982	0.991
									0.943	0.949	1.005	0.981	0.981	0.917	1.007	0.957	0.946	0.927	0.994	0.983	0.881	0.964	0.94				0.943	0.949	1.005	0.981	0.994	0.981	1.003		0.977	0.981	0.99		0.972	0.997	1.04				0.943	0.949	1.005	0.981	0.992
									0.943	0.948	1.005	0.982	0.981	0.916	1.007	0.957	0.945	0.925	0.996	0.982	0.881	0.964	0.941				0.943	0.948	1.005	0.982	0.995	0.981	1.006		0.977	0.983	0.992		0.971	0.997	1.04				0.943	0.948	1.005	0.982	0.994
									0.941	0.948	1.005	0.983	0.981	0.914	1.006	0.956	0.944	0.924	0.995	0.982	0.88	0.964	0.942				0.941	0.948	1.005	0.983	0.995	0.984	1.008		0.978	0.985	0.995		0.971	0.997	1.039				0.941	0.948	1.005	0.983	0.993
									0.939	0.947	1.005	0.983	0.981	0.913	1.007	0.956	0.944	0.922	0.996	0.984	0.879	0.964	0.941				0.939	0.947	1.005	0.983	0.996	0.985	1.009		0.977	0.987	0.997		0.969	0.998	1.037				0.939	0.947	1.005	0.983	0.994
									0.937	0.946	1.007	0.983	0.982	0.913	1.009	0.958	0.943	0.92	0.997	0.982	0.88	0.965	0.94				0.937	0.946	1.007	0.983	0.997	0.987	1.01		0.977	0.989	0.997		0.969	1	1.036				0.937	0.946	1.007	0.983	0.995
									0.938	0.946	1.006	0.983	0.981	0.913	1.007	0.958	0.943	0.92	0.996	0.98	0.88	0.963	0.939				0.938	0.946	1.006	0.983	0.997	0.99	1.011		0.977	0.99	1		0.969	0.997	1.036				0.938	0.946	1.006	0.983	0.994
									0.936	0.946	1.006	0.983	0.982	0.912	1.006	0.958	0.942	0.919	0.997	0.981	0.879	0.962	0.938				0.936	0.946	1.006	0.983	0.997	0.991	1.012		0.977	0.992	1.001		0.967	0.997	1.034				0.936	0.946	1.006	0.983	0.995
									0.936	0.947	1.006	0.981	0.981	0.91	1.007	0.957	0.942	0.919	0.998	0.982	0.878	0.964	0.937				0.936	0.947	1.006	0.981	0.997	0.991	1.012		0.977	0.992	1.002		0.966	0.996	1.033				0.936	0.947	1.006	0.981	0.995
									0.935	0.946	1.007	0.979	0.982	0.91	1.009	0.956	0.942	0.918	0.997	0.983	0.878	0.964	0.936				0.935	0.946	1.007	0.979	0.999	0.992	1.014		0.977	0.994	1.004		0.965	0.995	1.03				0.935	0.946	1.007	0.979	0.996
									0.935	0.945	1.004	0.979	0.981	0.912	1.008	0.956	0.94	0.917	0.994	0.982	0.878	0.965	0.934				0.935	0.945	1.004	0.979	0.999	0.994	1.014		0.978	0.997	1.006		0.963	0.994	1.029				0.935	0.945	1.004	0.979	0.996
									0.934	0.943	1.004	0.979	0.982	0.911	1.008	0.954	0.938	0.917	0.993	0.983	0.877	0.963	0.934				0.934	0.943	1.004	0.979	1	0.994	1.017		0.977	0.996	1.007		0.961	0.99	1.026				0.934	0.943	1.004	0.979	0.997
									0.932	0.942	1.005	0.979	0.98	0.91	1.007	0.954	0.936	0.916	0.993	0.981	0.877	0.962	0.933				0.932	0.942	1.005	0.979	1	0.992	1.017		0.976	0.996	1.009		0.96	0.987	1.024				0.932	0.942	1.005	0.979	0.998
									0.932	0.941	1.006	0.978	0.979	0.91	1.008	0.953	0.935	0.917	0.993	0.981	0.877	0.96	0.932				0.932	0.941	1.006	0.978	0.999	0.996	1.018		0.976	0.999	1.008		0.959	0.985	1.022				0.932	0.941	1.006	0.978	0.998
									0.931	0.94	1.009	0.978	0.979	0.911	1.008	0.951	0.935	0.918	0.994	0.98	0.876	0.962	0.931				0.931	0.94	1.009	0.978	0.999	0.998	1.02		0.976	1.001	1.009		0.957	0.984	1.021				0.931	0.94	1.009	0.978	0.998
									0.929	0.939	1.011	0.975	0.978	0.909	1.008	0.951	0.935	0.918	0.995	0.979	0.874	0.964	0.931				0.929	0.939	1.011	0.975	1	0.998	1.02		0.976	1.003	1.01		0.955	0.982	1.018				0.929	0.939	1.011	0.975	0.999
									0.929	0.938	1.013	0.974	0.979	0.909	1.008	0.95	0.936	0.919	0.994	0.979	0.874	0.964	0.931				0.929	0.938	1.013	0.974	1.001	0.999	1.021		0.976	1.006	1.011		0.954	0.98	1.016				0.929	0.938	1.013	0.974	0.998
									0.93	0.936	1.014	0.973	0.979	0.909	1.008	0.949	0.936	0.92	0.993	0.979	0.874	0.966	0.933				0.93	0.936	1.014	0.973	1	0.999	1.02		0.975	1.006	1.013		0.952	0.977	1.015				0.93	0.936	1.014	0.973	0.999
									0.929	0.934	1.014	0.971	0.978	0.908	1.008	0.947	0.934	0.919	0.994	0.978	0.874	0.968	0.931				0.929	0.934	1.014	0.971	1	1.001	1.02		0.974	1.007	1.013		0.95	0.975	1.013				0.929	0.934	1.014	0.971	0.998
									0.93	0.932	1.014	0.969	0.977	0.906	1.009	0.945	0.934	0.917	0.994	0.977	0.871	0.967	0.928				0.93	0.932	1.014	0.969	1.002	1.002	1.02		0.973	1.01	1.014		0.947	0.973	1.012				0.93	0.932	1.014	0.969	0.998
									0.928	0.93	1.015	0.967	0.976	0.905	1.007	0.944	0.933	0.918	0.993	0.975	0.871	0.967	0.926				0.928	0.93	1.015	0.967	1.001	1.003	1.019		0.972	1.011	1.013		0.944	0.972	1.01				0.928	0.93	1.015	0.967	0.997
									0.926	0.93	1.015	0.966	0.976	0.905	1.007	0.943	0.933	0.917	0.994	0.974	0.872	0.968	0.924				0.926	0.93	1.015	0.966	1.002	1.003	1.019		0.972	1.011	1.014		0.942	0.97	1.008				0.926	0.93	1.015	0.966	0.996
									0.926	0.929	1.017	0.967	0.975	0.906	1.005	0.944	0.933	0.914	0.995	0.976	0.871	0.969	0.925				0.926	0.929	1.017	0.967	1.002	1.004	1.022		0.971	1.013	1.014		0.939	0.969	1.007				0.926	0.929	1.017	0.967	0.997
									0.926	0.929	1.016	0.965	0.976	0.906	1.004	0.945	0.933	0.914	0.992	0.973	0.87	0.967	0.922				0.926	0.929	1.016	0.965	1.003	1.005	1.019		0.97	1.013	1.012		0.936	0.967	1.004				0.926	0.929	1.016	0.965	0.998
									0.926	0.93	1.014	0.965	0.975	0.906	1.003	0.945	0.932	0.914	0.992	0.973	0.869	0.966	0.92				0.926	0.93	1.014	0.965	1.003	1.003	1.02		0.969	1.012	1.013		0.934	0.964	1.002				0.926	0.93	1.014	0.965	0.998
									0.925	0.93	1.015	0.965	0.976	0.907	1.002	0.946	0.932	0.914	0.991	0.972	0.869	0.965	0.919				0.925	0.93	1.015	0.965	1.003	1.003	1.021		0.968	1.013	1.012		0.933	0.963	0.997				0.925	0.93	1.015	0.965	0.998
									0.925	0.931	1.019	0.968	0.975	0.906	1.005	0.946	0.932	0.913	0.994	0.971	0.868	0.967	0.919				0.925	0.931	1.019	0.968	1.002	1.006	1.02		0.967	1.016	1.012		0.931	0.963	0.993				0.925	0.931	1.019	0.968	0.999
									0.924	0.93	1.019	0.966	0.974	0.906	1.004	0.946	0.931	0.912	0.994	0.97	0.867	0.967	0.919				0.924	0.93	1.019	0.966	1.003	1.005	1.022		0.967	1.017	1.012		0.929	0.963	0.99				0.924	0.93	1.019	0.966	0.999
									0.923	0.929	1.019	0.967	0.973	0.906	1.004	0.945	0.931	0.911	0.993	0.97	0.867	0.966	0.919				0.923	0.929	1.019	0.967	1.002	1.004	1.023		0.966	1.017	1.013		0.926	0.962	0.988				0.923	0.929	1.019	0.967	0.999
									0.922	0.929	1.021	0.966	0.973	0.906	1.003	0.945	0.932	0.91	0.992	0.971	0.868	0.967	0.919				0.922	0.929	1.021	0.966	1.002	1.002	1.024		0.965	1.015	1.012		0.925	0.957	0.985				0.922	0.929	1.021	0.966	0.999
								3	0.923	0.93	1.022	0.967	0.973	0.905	1.004	0.946	0.931	0.908	0.992	0.971	0.868	0.967	0.919			3	0.923	0.93	1.022	0.967	1.003	1.005	1.023		0.964	1.016	1.013		0.923	0.954	0.983			3	0.923	0.93	1.022	0.967	1
									0.923	0.93	1.023	0.969	0.973	0.906	1.005	0.947	0.931	0.908	0.992	0.973	0.868	0.968	0.917				0.923	0.93	1.023	0.969	1.005	1.004	1.023		0.962	1.017	1.012		0.92	0.952	0.981				0.923	0.93	1.023	0.969	1
									0.922	0.932	1.024	0.97	0.973	0.907	1.005	0.946	0.93	0.908	0.992	0.973	0.868	0.967	0.915				0.922	0.932	1.024	0.97	1.003	1.005	1.022		0.961	1.018	1.011		0.92	0.949	0.979				0.922	0.932	1.024	0.97	0.998
									0.92	0.931	1.025	0.971	0.972	0.907	1.005	0.947	0.929	0.908	0.992	0.975	0.868	0.967	0.916				0.92	0.931	1.025	0.971	1.004	1.007	1.023		0.959	1.019	1.011		0.919	0.948	0.978				0.92	0.931	1.025	0.971	1
									0.92	0.931	1.025	0.97	0.971	0.905	1.006	0.946	0.928	0.906	0.992	0.975	0.867	0.967	0.916				0.92	0.931	1.025	0.97	1.002	1.007	1.023		0.958	1.021	1.011		0.917	0.946	0.976				0.92	0.931	1.025	0.97	0.999
									0.92	0.932	1.024	0.973	0.972	0.905	1.003	0.944	0.927	0.906	0.992	0.976	0.866	0.966	0.916				0.92	0.932	1.024	0.973	1.002	1.01	1.023		0.958	1.018	1.011		0.917	0.941	0.975				0.92	0.932	1.024	0.973	0.998
									0.92	0.931	1.021	0.973	0.971	0.903	1.001	0.945	0.925	0.905	0.989	0.975	0.865	0.966	0.917				0.92	0.931	1.021	0.973	1.001	1.011	1.025		0.957	1.022	1.011		0.915	0.94	0.973				0.92	0.931	1.021	0.973	0.997
									0.92	0.93	1.023	0.972	0.971	0.904	0.999	0.945	0.924	0.906	0.99	0.976	0.864	0.965	0.915				0.92	0.93	1.023	0.972	1	1.007	1.026		0.955	1.017	1.011		0.91	0.939	0.972				0.92	0.93	1.023	0.972	0.996
									0.919	0.93	1.022	0.972	0.97	0.903	1.001	0.945	0.923	0.905	0.989	0.977	0.865	0.966	0.914				0.919	0.93	1.022	0.972	0.999	1.01	1.024		0.954	1.02	1.011		0.908	0.938	0.97				0.919	0.93	1.022	0.972	0.996
									0.918	0.928	1.023	0.973	0.969	0.903	0.999	0.945	0.922	0.903	0.989	0.978	0.865	0.967	0.915				0.918	0.928	1.023	0.973	0.997	1.012	1.025		0.951	1.019	1.011		0.906	0.937	0.968				0.918	0.928	1.023	0.973	0.994
									0.92	0.927	1.023	0.974	0.968	0.902	0.999	0.946	0.922	0.901	0.99	0.978	0.864	0.967	0.914				0.92	0.927	1.023	0.974	0.995	1.013	1.027		0.95	1.02	1.011		0.904	0.935	0.967				0.92	0.927	1.023	0.974	0.993
									0.919	0.927	1.024	0.974	0.967	0.9	0.998	0.946	0.921	0.9	0.988	0.979	0.864	0.966	0.913				0.919	0.927	1.024	0.974	0.995	1.012	1.026		0.949	1.019	1.01		0.9	0.935	0.965				0.919	0.927	1.024	0.974	0.993
									0.921	0.927	1.026	0.972	0.966	0.899	0.998	0.947	0.92	0.9	0.988	0.978	0.863	0.968	0.913				0.921	0.927	1.026	0.972	0.994	1.014	1.025		0.946	1.019	1.01		0.898	0.932	0.962				0.921	0.927	1.026	0.972	0.993
									0.921	0.926	1.026	0.973	0.965	0.898	0.999	0.947	0.919	0.901	0.989	0.978	0.863	0.969	0.912				0.921	0.926	1.026	0.973	0.995	1.014	1.025		0.944	1.02	1.009		0.892	0.931	0.961				0.921	0.926	1.026	0.973	0.993
									0.922	0.925	1.027	0.975	0.964	0.898	0.998	0.948	0.918	0.9	0.989	0.977	0.862	0.97	0.913				0.922	0.925	1.027	0.975	0.993	1.016	1.026		0.943	1.02	1.009		0.889	0.929	0.96				0.922	0.925	1.027	0.975	0.992
									0.923	0.926	1.027	0.976	0.965	0.898	0.998	0.948	0.917	0.9	0.989	0.977	0.862	0.97	0.912				0.923	0.926	1.027	0.976	0.993	1.015	1.027		0.943	1.021	1.009		0.887	0.927	0.956				0.923	0.926	1.027	0.976	0.992
									0.923	0.926	1.027	0.974	0.965	0.898	0.997	0.948	0.918	0.899	0.989	0.978	0.863	0.97	0.912				0.923	0.926	1.027	0.974	0.993	1.015	1.027		0.942	1.023	1.009		0.885	0.926	0.954				0.923	0.926	1.027	0.974	0.992
									0.923	0.925	1.028	0.975	0.964	0.899	0.996	0.949	0.917	0.896	0.99	0.976	0.861	0.97	0.913				0.923	0.925	1.028	0.975	0.993	1.015	1.026		0.941	1.023	1.009		0.882	0.924	0.95				0.923	0.925	1.028	0.975	0.992
									0.924	0.93	1.028	0.975	0.964	0.899	0.998	0.949	0.917	0.896	0.991	0.975	0.864	0.971	0.913				0.924	0.93	1.028	0.975	0.993	1.016	1.027		0.941	1.025	1.009		0.879	0.922	0.946				0.924	0.93	1.028	0.975	0.991
									0.923	0.925	1.028	0.976	0.964	0.9	0.998	0.95	0.916	0.895	0.992	0.975	0.862	0.971	0.911				0.923	0.925	1.028	0.976	0.993	1.019	1.026		0.94	1.027	1.01		0.879	0.921	0.945				0.923	0.925	1.028	0.976	0.991
									0.924	0.926	1.025	0.978	0.964	0.9	0.998	0.949	0.915	0.893	0.992	0.977	0.861	0.969	0.911				0.924	0.926	1.025	0.978	0.991	1.018	1.026		0.938	1.026	1.011		0.877	0.919	0.943				0.924	0.926	1.025	0.978	0.99
									0.925	0.929	1.024	0.977	0.963	0.903	0.999	0.95	0.914	0.894	0.991	0.976	0.862	0.968	0.91				0.925	0.929	1.024	0.977	0.991	1.017	1.027		0.937	1.027	1.01		0.876	0.919	0.941				0.925	0.929	1.024	0.977	0.99
									0.925	0.927	1.023	0.977	0.962	0.901	0.998	0.951	0.913	0.892	0.993	0.976	0.859	0.966	0.911				0.925	0.927	1.023	0.977	0.99	1.016	1.027		0.936	1.026	1.011		0.875	0.919	0.939				0.925	0.927	1.023	0.977	0.988
									0.925	0.927	1.024	0.975	0.962	0.901	0.998	0.95	0.912	0.891	0.993	0.974	0.858	0.966	0.911				0.925	0.927	1.024	0.975	0.989	1.015	1.027		0.934	1.027	1.01		0.873	0.918	0.939				0.925	0.927	1.024	0.975	0.986
									0.925	0.926	1.025	0.976	0.962	0.901	0.998	0.951	0.912	0.89	0.994	0.973	0.856	0.966	0.912				0.925	0.926	1.025	0.976	0.988	1.017	1.027		0.933	1.026	1.01		0.872	0.917	0.938				0.925	0.926	1.025	0.976	0.984
									0.926	0.926	1.024	0.979	0.961	0.902	0.998	0.952	0.913	0.891	0.994	0.974	0.855	0.966	0.912				0.926	0.926	1.024	0.979	0.988	1.018	1.027		0.932	1.026	1.009		0.871	0.916	0.938				0.926	0.926	1.024	0.979	0.983
									0.927	0.928	1.025	0.978	0.961	0.905	0.997	0.951	0.912	0.892	0.994	0.974	0.855	0.965	0.911				0.927	0.928	1.025	0.978	0.988	1.016	1.027		0.93	1.026	1.008		0.872	0.916	0.937				0.927	0.928	1.025	0.978	0.983
									0.928	0.925	1.024	0.976	0.961	0.905	0.998	0.951	0.911	0.893	0.993	0.974	0.854	0.965	0.912				0.928	0.925	1.024	0.976	0.987	1.016	1.028		0.929	1.025	1.01		0.868	0.913	0.936				0.928	0.925	1.024	0.976	0.983
									0.928	0.925	1.023	0.973	0.959	0.905	0.998	0.95	0.91	0.894	0.994	0.973	0.854	0.964	0.911				0.928	0.925	1.023	0.973	0.987	1.018	1.028		0.927	1.024	1.009		0.864	0.913	0.935				0.928	0.925	1.023	0.973	0.983
									0.927	0.926	1.023	0.973	0.961	0.908	0.998	0.951	0.91	0.894	0.995	0.974	0.856	0.965	0.911				0.927	0.926	1.023	0.973	0.987	1.015	1.029		0.923	1.023	1.007		0.862	0.912	0.934				0.927	0.926	1.023	0.973	0.983
								4	0.927	0.928	1.024	0.974	0.962	0.91	0.998	0.952	0.911	0.897	0.993	0.974	0.856	0.966	0.91			4	0.927	0.928	1.024	0.974	0.987	1.012	1.029		0.921	1.021	1.007		0.864	0.91	0.933			4	0.927	0.928	1.024	0.974	0.981
									0.927	0.929	1.02	0.973	0.962	0.909	0.996	0.952	0.91	0.898	0.99	0.975	0.855	0.964	0.911				0.927	0.929	1.02	0.973	0.986	1.012	1.029		0.919	1.02	1.007		0.859	0.91	0.931				0.927	0.929	1.02	0.973	0.981
									0.927	0.929	1.022	0.973	0.963	0.908	0.998	0.951	0.91	0.899	0.991	0.977	0.856	0.966	0.912				0.927	0.929	1.022	0.973	0.986	1.011	1.029		0.918	1.018	1.008		0.858	0.909	0.93				0.927	0.929	1.022	0.973	0.982
									0.929	0.929	1.024	0.974	0.962	0.908	0.997	0.952	0.91	0.9	0.992	0.977	0.855	0.966	0.911				0.929	0.929	1.024	0.974	0.987	1.011	1.029		0.917	1.019	1.009		0.857	0.907	0.927				0.929	0.929	1.024	0.974	0.983
									0.933	0.925	1.022	0.974	0.965	0.905	0.995	0.951	0.912	0.897	0.989	0.976	0.852	0.964	0.909				0.933	0.925	1.022	0.974	0.986	1.011	1.028		0.916	1.019	1.009		0.853	0.905	0.924				0.933	0.925	1.022	0.974	0.983
									0.931	0.925	1.022	0.974	0.962	0.905	0.995	0.951	0.91	0.895	0.99	0.976	0.852	0.964	0.908				0.931	0.925	1.022	0.974	0.991	1.011	1.027		0.918	1.018	1.01		0.85	0.906	0.922				0.931	0.925	1.022	0.974	0.987
									0.93	0.928	1.022	0.975	0.962	0.906	0.995	0.951	0.906	0.897	0.989	0.976	0.854	0.964	0.908				0.93	0.928	1.022	0.975	0.99	1.012	1.026		0.912	1.019	1.01		0.849	0.905	0.92				0.93	0.928	1.022	0.975	0.985
									0.93	0.928	1.023	0.977	0.963	0.906	0.995	0.952	0.906	0.898	0.989	0.976	0.854	0.964	0.908				0.93	0.928	1.023	0.977	0.984	1.013	1.025		0.912	1.02	1.011		0.848	0.907	0.918				0.93	0.928	1.023	0.977	0.977
									0.93	0.929	1.022	0.976	0.963	0.906	0.993	0.952	0.907	0.898	0.988	0.976	0.853	0.963	0.908				0.93	0.929	1.022	0.976	0.984	1.013	1.024		0.912	1.019	1.01		0.845	0.905	0.918				0.93	0.929	1.022	0.976	0.976
									0.932	0.931	1.024	0.978	0.963	0.911	0.994	0.952	0.907	0.903	0.989	0.975	0.856	0.964	0.912				0.932	0.931	1.024	0.978	0.985	1.014	1.025		0.91	1.021	1.011		0.848	0.904	0.918				0.932	0.931	1.024	0.978	0.976
									0.932	0.93	1.024	0.976	0.964	0.908	0.994	0.952	0.907	0.901	0.992	0.974	0.853	0.964	0.907				0.932	0.93	1.024	0.976	0.984	1.014	1.025		0.909	1.021	1.012		0.843	0.904	0.918				0.932	0.93	1.024	0.976	0.974
									0.934	0.928	1.024	0.978	0.963	0.907	0.995	0.953	0.906	0.901	0.991	0.974	0.852	0.964	0.906				0.934	0.928	1.024	0.978	0.984	1.015	1.025		0.908	1.023	1.012		0.839	0.904	0.917				0.934	0.928	1.024	0.978	0.975
									0.936	0.929	1.021	0.979	0.963	0.907	0.994	0.954	0.907	0.901	0.988	0.974	0.853	0.963	0.906				0.936	0.929	1.021	0.979	0.984	1.015	1.023		0.907	1.022	1.011		0.837	0.903	0.915				0.936	0.929	1.021	0.979	0.976
									0.938	0.929	1.023	0.979	0.963	0.906	0.994	0.953	0.907	0.901	0.987	0.978	0.851	0.963	0.905				0.938	0.929	1.023	0.979	0.985	1.015	1.023		0.906	1.022	1.01		0.836	0.901	0.915				0.938	0.929	1.023	0.979	0.976
									0.939	0.931	1.024	0.979	0.963	0.906	0.994	0.954	0.907	0.901	0.987	0.974	0.85	0.965	0.905				0.939	0.931	1.024	0.979	0.985	1.016	1.023		0.906	1.021	1.01		0.834	0.9	0.915				0.939	0.931	1.024	0.979	0.977
									0.938	0.932	1.024	0.98	0.964	0.906	0.996	0.953	0.908	0.902	0.988	0.974	0.848	0.965	0.904				0.938	0.932	1.024	0.98	0.984	1.015	1.023		0.905	1.02	1.009		0.834	0.899	0.912				0.938	0.932	1.024	0.98	0.978
									0.939	0.934	1.026	0.981	0.964	0.905	0.994	0.954	0.908	0.902	0.988	0.974	0.848	0.966	0.905				0.939	0.934	1.026	0.981	0.985	1.016	1.02		0.903	1.02	1.008		0.834	0.898	0.911				0.939	0.934	1.026	0.981	0.978
									0.934	0.934	1.026	0.982	0.957	0.903	0.995	0.956	0.901	0.902	0.986	0.975	0.848	0.966	0.904				0.934	0.934	1.026	0.982	0.987	1.018	1.021		0.897	1.018	1.007		0.832	0.897	0.909				0.934	0.934	1.026	0.982	0.981
									0.935	0.935	1.025	0.982	0.957	0.904	0.995	0.957	0.901	0.901	0.986	0.975	0.847	0.964	0.906				0.935	0.935	1.025	0.982	0.979	1.019	1.021		0.897	1.017	1.007		0.831	0.895	0.908				0.935	0.935	1.025	0.982	0.975
									0.934	0.935	1.026	0.985	0.958	0.904	0.995	0.956	0.901	0.9	0.985	0.975	0.845	0.965	0.906				0.934	0.935	1.026	0.985	0.979	1.02	1.021		0.896	1.017	1.007		0.829	0.897	0.907				0.934	0.935	1.026	0.985	0.974
									0.935	0.936	1.026	0.985	0.958	0.905	0.996	0.956	0.9	0.9	0.986	0.973	0.844	0.966	0.906				0.935	0.936	1.026	0.985	0.979	1.022	1.021		0.894	1.017	1.006		0.827	0.897	0.903				0.935	0.936	1.026	0.985	0.973
									0.935	0.938	1.026	0.984	0.959	0.905	0.995	0.955	0.9	0.9	0.986	0.974	0.844	0.966	0.907				0.935	0.938	1.026	0.984	0.98	1.022	1.022		0.894	1.017	1.005		0.827	0.899	0.903				0.935	0.938	1.026	0.984	0.973
									0.937	0.939	1.028	0.985	0.957	0.906	0.995	0.958	0.9	0.901	0.985	0.972	0.844	0.966	0.907				0.937	0.939	1.028	0.985	0.98	1.022	1.021		0.892	1.017	1.003		0.826	0.9	0.903				0.937	0.939	1.028	0.985	0.974
									0.938	0.942	1.03	0.984	0.958	0.909	0.996	0.959	0.898	0.902	0.985	0.973	0.844	0.964	0.907				0.938	0.942	1.03	0.984	0.979	1.021	1.02		0.888	1.017	1.002		0.828	0.899	0.901				0.938	0.942	1.03	0.984	0.974
									0.938	0.943	1.031	0.986	0.958	0.908	0.996	0.957	0.899	0.901	0.985	0.971	0.844	0.965	0.907				0.938	0.943	1.031	0.986	0.979	1.022	1.02		0.886	1.016	1.002		0.829	0.899	0.899				0.938	0.943	1.031	0.986	0.972
									0.938	0.941	1.033	0.985	0.958	0.909	0.996	0.959	0.899	0.9	0.985	0.971	0.842	0.965	0.909				0.938	0.941	1.033	0.985	0.978	1.021	1.019		0.885	1.017	1.002		0.827	0.9	0.898				0.938	0.941	1.033	0.985	0.972
									0.938	0.941	1.028	0.985	0.958	0.908	0.99	0.961	0.898	0.899	0.981	0.97	0.841	0.962	0.909				0.938	0.941	1.028	0.985	0.978	1.019	1.02		0.884	1.012	1.001		0.825	0.895	0.895				0.938	0.941	1.028	0.985	0.971
									0.938	0.942	1.029	0.985	0.957	0.908	0.991	0.961	0.898	0.898	0.981	0.97	0.841	0.961	0.91				0.938	0.942	1.029	0.985	0.977	1.016	1.021		0.881	1.013	1.001		0.825	0.895	0.893				0.938	0.942	1.029	0.985	0.97
									0.938	0.943	1.03	0.987	0.958	0.909	0.994	0.962	0.897	0.899	0.982	0.97	0.841	0.959	0.91				0.938	0.943	1.03	0.987	0.976	1.015	1.02		0.881	1.013	0.999		0.825	0.894	0.892				0.938	0.943	1.03	0.987	0.97
									0.938	0.942	1.033	0.987	0.957	0.909	0.994	0.961	0.898	0.899	0.984	0.97	0.841	0.962	0.91				0.938	0.942	1.033	0.987	0.976	1.015	1.02		0.88	1.018	0.999		0.826	0.897	0.89				0.938	0.942	1.033	0.987	0.971
								5	0.939	0.943	1.036	0.987	0.958	0.909	0.996	0.962	0.897	0.899	0.984	0.973	0.841	0.961	0.909			5	0.939	0.943	1.036	0.987	0.975	1.015	1.018		0.878	1.015	1		0.823	0.898	0.889			5	0.939	0.943	1.036	0.987	0.971
									0.94	0.943	1.038	0.987	0.958	0.908	0.996	0.96	0.897	0.899	0.984	0.973	0.841	0.963	0.91				0.94	0.943	1.038	0.987	0.974	1.02	1.019		0.878	1.015	0.997		0.822	0.899	0.889				0.94	0.943	1.038	0.987	0.97
									0.939	0.943	1.038	0.988	0.957	0.909	0.996	0.962	0.897	0.899	0.983	0.973	0.841	0.963	0.91				0.939	0.943	1.038	0.988	0.975	1.018	1.019		0.877	1.012	0.996		0.822	0.898	0.89				0.939	0.943	1.038	0.988	0.971
									0.939	0.945	1.036	0.991	0.958	0.909	0.994	0.962	0.896	0.899	0.98	0.972	0.842	0.962	0.908				0.939	0.945	1.036	0.991	0.974	1.019	1.018		0.877	1.014	0.997		0.821	0.896	0.889				0.939	0.945	1.036	0.991	0.971
									0.939	0.946	1.036	0.99	0.957	0.909	0.994	0.963	0.896	0.899	0.981	0.972	0.842	0.962	0.91				0.939	0.946	1.036	0.99	0.974	1.018	1.019		0.876	1.011	0.997		0.822	0.893	0.89				0.939	0.946	1.036	0.99	0.97
									0.939	0.948	1.036	0.991	0.957	0.909	0.994	0.963	0.895	0.898	0.98	0.971	0.843	0.961	0.913				0.939	0.948	1.036	0.991	0.973	1.019	1.02		0.875	1.013	0.996		0.82	0.895	0.891				0.939	0.948	1.036	0.991	0.969
									0.939	0.95	1.036	0.99	0.956	0.908	0.993	0.962	0.896	0.898	0.98	0.971	0.842	0.959	0.914				0.939	0.95	1.036	0.99	0.973	1.017	1.019		0.873	1.012	0.996		0.82	0.895	0.89				0.939	0.95	1.036	0.99	0.968
									0.939	0.951	1.037	0.991	0.957	0.908	0.991	0.964	0.895	0.898	0.983	0.972	0.842	0.959	0.914				0.939	0.951	1.037	0.991	0.971	1.016	1.019		0.872	1.009	0.996		0.819	0.892	0.889				0.939	0.951	1.037	0.991	0.968
									0.94	0.951	1.039	0.991	0.956	0.908	0.993	0.964	0.895	0.896	0.982	0.974	0.843	0.959	0.914				0.94	0.951	1.039	0.991	0.97	1.016	1.019		0.871	1.009	0.995		0.819	0.893	0.889				0.94	0.951	1.039	0.991	0.967
									0.941	0.952	1.04	0.99	0.956	0.909	0.995	0.966	0.895	0.897	0.983	0.975	0.843	0.958	0.913				0.941	0.952	1.04	0.99	0.97	1.017	1.019		0.871	1.012	0.995		0.819	0.894	0.89				0.941	0.952	1.04	0.99	0.967
									0.942	0.952	1.042	0.991	0.957	0.908	0.993	0.966	0.895	0.898	0.985	0.972	0.845	0.963	0.913				0.942	0.952	1.042	0.991	0.969	1.018	1.02		0.87	1.011	0.994		0.818	0.893	0.891				0.942	0.952	1.042	0.991	0.968
									0.942	0.953	1.043	0.99	0.957	0.91	0.994	0.968	0.894	0.9	0.988	0.972	0.846	0.965	0.913				0.942	0.953	1.043	0.99	0.969	1.018	1.02		0.869	1.011	0.995		0.819	0.896	0.89				0.942	0.953	1.043	0.99	0.967
									0.942	0.953	1.043	0.992	0.957	0.911	0.993	0.969	0.894	0.899	0.988	0.972	0.846	0.964	0.914				0.942	0.953	1.043	0.992	0.969	1.016	1.02		0.867	1.01	0.994		0.819	0.896	0.889				0.942	0.953	1.043	0.992	0.966
									0.944	0.953	1.045	0.993	0.958	0.912	0.996	0.968	0.894	0.902	0.992	0.972	0.846	0.965	0.915				0.944	0.953	1.045	0.993	0.968	1.021	1.019		0.864	1.01	0.994		0.817	0.9	0.888				0.944	0.953	1.045	0.993	0.967
									0.945	0.955	1.049	0.992	0.958	0.912	0.993	0.968	0.894	0.904	0.992	0.972	0.848	0.966	0.917				0.945	0.955	1.049	0.992	0.968	1.022	1.018		0.862	1.01	0.994		0.818	0.901	0.887				0.945	0.955	1.049	0.992	0.968
									0.945	0.955	1.047	0.992	0.957	0.911	0.989	0.968	0.894	0.902	0.99	0.972	0.845	0.965	0.917				0.945	0.955	1.047	0.992	0.97	1.022	1.017		0.859	1.004	0.994		0.816	0.9	0.887				0.945	0.955	1.047	0.992	0.968
									0.946	0.955	1.044	0.993	0.956	0.913	0.989	0.969	0.894	0.903	0.989	0.971	0.846	0.964	0.918				0.946	0.955	1.044	0.993	0.969	1.018	1.017		0.855	1.004	0.995		0.816	0.9	0.886				0.946	0.955	1.044	0.993	0.967
									0.946	0.957	1.046	0.992	0.956	0.916	0.989	0.97	0.893	0.905	0.989	0.97	0.847	0.961	0.918				0.946	0.957	1.046	0.992	0.969	1.018	1.015		0.854	1.001	0.994		0.816	0.901	0.886				0.946	0.957	1.046	0.992	0.967
									0.946	0.956	1.049	0.992	0.956	0.915	0.99	0.97	0.893	0.904	0.993	0.968	0.847	0.961	0.918				0.946	0.956	1.049	0.992	0.969	1.018	1.014		0.853	1	0.995		0.815	0.901	0.886				0.946	0.956	1.049	0.992	0.967
									0.947	0.957	1.051	0.995	0.955	0.917	0.99	0.969	0.892	0.902	0.995	0.968	0.847	0.962	0.917				0.947	0.957	1.051	0.995	0.968	1.021	1.015		0.853	1	0.993		0.815	0.903	0.886				0.947	0.957	1.051	0.995	0.967
									0.947	0.959	1.051	0.994	0.955	0.919	0.991	0.969	0.891	0.904	0.995	0.967	0.847	0.963	0.917				0.947	0.959	1.051	0.994	0.968	1.021	1.016		0.852	0.998	0.992		0.815	0.905	0.886				0.947	0.959	1.051	0.994	0.967
									0.948	0.96	1.053	0.995	0.954	0.919	0.992	0.97	0.89	0.903	0.996	0.967	0.849	0.964	0.915				0.948	0.96	1.053	0.995	0.968	1.021	1.015		0.851	0.999	0.992		0.817	0.904	0.886				0.948	0.96	1.053	0.995	0.967
									0.948	0.96	1.053	0.996	0.954	0.92	0.994	0.97	0.89	0.904	0.996	0.967	0.849	0.964	0.915				0.948	0.96	1.053	0.996	0.966	1.023	1.013		0.851	0.999	0.992		0.815	0.904	0.886				0.948	0.96	1.053	0.996	0.968
									0.948	0.959	1.055	0.996	0.954	0.919	0.994	0.969	0.889	0.902	0.997	0.968	0.848	0.965	0.914				0.948	0.959	1.055	0.996	0.966	1.023	1.013		0.851	1	0.991		0.817	0.906	0.886				0.948	0.959	1.055	0.996	0.968
									0.947	0.959	1.056	0.998	0.952	0.919	0.995	0.969	0.889	0.901	0.998	0.97	0.847	0.965	0.913				0.947	0.959	1.056	0.998	0.964	1.024	1.012		0.85	1	0.99		0.816	0.905	0.886				0.947	0.959	1.056	0.998	0.968
									0.947	0.961	1.056	0.998	0.95	0.919	0.992	0.969	0.888	0.9	0.997	0.97	0.848	0.964	0.913				0.947	0.961	1.056	0.998	0.963	1.025	1.012		0.85	1	0.99		0.816	0.902	0.887				0.947	0.961	1.056	0.998	0.968
									0.947	0.962	1.058	0.998	0.951	0.919	0.993	0.97	0.888	0.9	0.998	0.969	0.849	0.964	0.913				0.947	0.962	1.058	0.998	0.963	1.024	1.008		0.85	0.999	0.989		0.817	0.901	0.888				0.947	0.962	1.058	0.998	0.968
									0.946	0.964	1.06	0.997	0.951	0.921	0.993	0.971	0.889	0.9	0.998	0.971	0.85	0.964	0.912				0.946	0.964	1.06	0.997	0.962	1.022	1.006		0.85	0.999	0.987		0.817	0.898	0.889				0.946	0.964	1.06	0.997	0.968
									0.946	0.965	1.06	0.999	0.952	0.922	0.993	0.972	0.888	0.901	0.996	0.971	0.85	0.963	0.912				0.946	0.965	1.06	0.999	0.962	1.023	1.004		0.85	1.001	0.986		0.817	0.897	0.889				0.946	0.965	1.06	0.999	0.968
									0.946	0.964	1.063	1.001	0.952	0.92	0.995	0.97	0.888	0.9	0.997	0.972	0.848	0.965	0.912				0.946	0.964	1.063	1.001	0.963	1.023	1.002		0.849	1	0.985		0.816	0.897	0.89				0.946	0.964	1.063	1.001	0.968
								6	0.946	0.963	1.063	1.001	0.951	0.921	0.992	0.971	0.887	0.899	0.993	0.972	0.847	0.962	0.913			6	0.946	0.963	1.063	1.001	0.962	1.024	1.001		0.849	0.997	0.985		0.814	0.896	0.89			6	0.946	0.963	1.063	1.001	0.969
									0.947	0.964	1.061	1	0.951	0.921	0.993	0.971	0.888	0.899	0.994	0.973	0.846	0.962	0.913				0.947	0.964	1.061	1	0.962	1.018	1.002		0.848	0.996	0.983		0.815	0.896	0.892				0.947	0.964	1.061	1	0.968
									0.947	0.963	1.065	1.002	0.95	0.921	0.993	0.972	0.888	0.898	0.994	0.974	0.845	0.961	0.913				0.947	0.963	1.065	1.002	0.962	1.019	1.001		0.847	0.996	0.982		0.816	0.897	0.893				0.947	0.963	1.065	1.002	0.969
									0.948	0.964	1.066	1.004	0.95	0.921	0.992	0.973	0.889	0.899	0.994	0.973	0.846	0.961	0.913				0.948	0.964	1.066	1.004	0.961	1.019	1.002		0.846	0.997	0.981		0.817	0.897	0.894				0.948	0.964	1.066	1.004	0.968
									0.949	0.964	1.067	1.005	0.95	0.923	0.993	0.972	0.888	0.898	0.995	0.971	0.846	0.96	0.914				0.949	0.964	1.067	1.005	0.961	1.021	1.001		0.846	0.998	0.98		0.818	0.899	0.895				0.949	0.964	1.067	1.005	0.967
									0.95	0.964	1.068	1.007	0.95	0.924	0.994	0.973	0.886	0.898	0.996	0.974	0.847	0.961	0.913				0.95	0.964	1.068	1.007	0.962	1.021	1.002		0.846	0.996	0.98		0.819	0.899	0.895				0.95	0.964	1.068	1.007	0.967
									0.951	0.965	1.068	1.006	0.95	0.927	0.994	0.974	0.887	0.9	0.997	0.975	0.849	0.961	0.913				0.951	0.965	1.068	1.006	0.961	1.022	1.003		0.845	0.994	0.979		0.822	0.901	0.896				0.951	0.965	1.068	1.006	0.967
									0.951	0.966	1.069	1.007	0.951	0.927	0.994	0.974	0.887	0.9	0.998	0.975	0.85	0.962	0.914				0.951	0.966	1.069	1.007	0.96	1.023	1.004		0.845	0.993	0.978		0.82	0.902	0.896				0.951	0.966	1.069	1.007	0.966
									0.95	0.964	1.068	1.005	0.95	0.926	0.995	0.974	0.887	0.898	0.998	0.974	0.85	0.963	0.914				0.95	0.964	1.068	1.005	0.96	1.025	1.003		0.844	0.992	0.977		0.822	0.902	0.896				0.95	0.964	1.068	1.005	0.965
									0.95	0.966	1.067	1.005	0.95	0.929	0.995	0.974	0.887	0.901	0.998	0.974	0.851	0.964	0.915				0.95	0.966	1.067	1.005	0.959	1.025	1.004		0.843	0.991	0.975		0.821	0.901	0.895				0.95	0.966	1.067	1.005	0.965
									0.952	0.965	1.067	1.005	0.949	0.926	0.993	0.972	0.887	0.9	0.999	0.974	0.851	0.964	0.916				0.952	0.965	1.067	1.005	0.957	1.024	1.006		0.841	0.99	0.975		0.821	0.902	0.896				0.952	0.965	1.067	1.005	0.965
									0.952	0.966	1.069	1.005	0.948	0.93	0.995	0.972	0.887	0.901	0.999	0.974	0.853	0.964	0.917				0.952	0.966	1.069	1.005	0.956	1.025	1.005		0.841	0.989	0.974		0.82	0.903	0.897				0.952	0.966	1.069	1.005	0.965
									0.953	0.964	1.068	1.007	0.948	0.928	0.996	0.972	0.887	0.899	1	0.976	0.853	0.965	0.915				0.953	0.964	1.068	1.007	0.957	1.023	1.005		0.839	0.989	0.973		0.82	0.902	0.896				0.953	0.964	1.068	1.007	0.965
									0.953	0.967	1.068	1.009	0.949	0.93	0.994	0.974	0.887	0.9	1.001	0.977	0.854	0.965	0.915				0.953	0.967	1.068	1.009	0.955	1.024	1.004		0.838	0.987	0.972		0.82	0.903	0.896				0.953	0.967	1.068	1.009	0.964
									0.954	0.965	1.069	1.008	0.951	0.927	0.993	0.976	0.889	0.899	1.003	0.977	0.853	0.966	0.915				0.954	0.965	1.069	1.008	0.956	1.024	1.005		0.84	0.987	0.971		0.818	0.903	0.895				0.954	0.965	1.069	1.008	0.965
									0.954	0.967	1.07	1.01	0.951	0.928	0.994	0.975	0.889	0.899	1.003	0.979	0.855	0.966	0.914				0.954	0.967	1.07	1.01	0.956	1.024	1.007		0.839	0.985	0.971		0.816	0.903	0.894				0.954	0.967	1.07	1.01	0.967
									0.951	0.967	1.073	1.01	0.947	0.928	0.995	0.977	0.887	0.898	1.003	0.979	0.854	0.967	0.918				0.951	0.967	1.073	1.01	0.952	1.024	1.007		0.833	0.984	0.972		0.817	0.904	0.895				0.951	0.967	1.073	1.01	0.964
									0.955	0.966	1.072	1.009	0.949	0.926	0.993	0.976	0.89	0.896	1	0.979	0.854	0.968	0.915				0.955	0.966	1.072	1.009	0.951	1.025	1.008		0.835	0.985	0.974		0.817	0.902	0.895				0.955	0.966	1.072	1.009	0.963
									0.953	0.967	1.069	1.01	0.95	0.927	0.993	0.977	0.888	0.897	0.999	0.979	0.856	0.963	0.914				0.953	0.967	1.069	1.01	0.954	1.025	1.009		0.834	0.984	0.974		0.814	0.9	0.894				0.953	0.967	1.069	1.01	0.965
									0.953	0.968	1.072	1.011	0.951	0.926	0.993	0.977	0.889	0.899	1	0.979	0.857	0.966	0.915				0.953	0.968	1.072	1.011	0.952	1.021	1.01		0.834	0.982	0.974		0.814	0.901	0.892				0.953	0.968	1.072	1.011	0.963
									0.952	0.968	1.073	1.014	0.95	0.926	0.996	0.979	0.89	0.899	1.001	0.98	0.858	0.965	0.916				0.952	0.968	1.073	1.014	0.952	1.023	1.009		0.833	0.983	0.974		0.815	0.904	0.894				0.952	0.968	1.073	1.014	0.963
									0.953	0.969	1.074	1.016	0.95	0.928	0.998	0.979	0.888	0.9	1.003	0.979	0.86	0.965	0.915				0.953	0.969	1.074	1.016	0.952	1.022	1.009		0.832	0.982	0.974		0.813	0.905	0.896				0.953	0.969	1.074	1.016	0.962
									0.952	0.97	1.075	1.016	0.951	0.929	0.999	0.979	0.889	0.9	1.003	0.98	0.86	0.968	0.914				0.952	0.97	1.075	1.016	0.95	1.022	1.009		0.832	0.981	0.975		0.812	0.904	0.896				0.952	0.97	1.075	1.016	0.961
									0.952	0.97	1.076	1.017	0.951	0.928	0.999	0.979	0.89	0.9	1.004	0.98	0.861	0.968	0.915				0.952	0.97	1.076	1.017	0.952	1.022	1.008		0.833	0.981	0.974		0.813	0.906	0.896				0.952	0.97	1.076	1.017	0.961
									0.953	0.97	1.077	1.019	0.952	0.928	0.999	0.98	0.889	0.901	1.004	0.982	0.863	0.972	0.916				0.953	0.97	1.077	1.019	0.953	1.02	1.009		0.834	0.981	0.975		0.813	0.908	0.897				0.953	0.97	1.077	1.019	0.962
									0.952	0.969	1.077	1.02	0.949	0.928	0.999	0.98	0.887	0.902	1.003	0.983	0.864	0.971	0.917				0.952	0.969	1.077	1.02	0.955	1.021	1.008		0.833	0.98	0.974		0.813	0.907	0.897				0.952	0.969	1.077	1.02	0.963
									0.951	0.972	1.08	1.02	0.949	0.93	1	0.982	0.887	0.903	1.001	0.983	0.865	0.972	0.917				0.951	0.972	1.08	1.02	0.953	1.02	1.007		0.831	0.98	0.974		0.813	0.907	0.898				0.951	0.972	1.08	1.02	0.96
									0.952	0.972	1.08	1.019	0.95	0.931	0.999	0.983	0.887	0.903	1.002	0.984	0.866	0.973	0.917				0.952	0.972	1.08	1.019	0.952	1.02	1.007		0.832	0.981	0.973		0.813	0.907	0.899				0.952	0.972	1.08	1.019	0.961
									0.953	0.974	1.081	1.017	0.95	0.933	0.998	0.986	0.887	0.903	1.002	0.985	0.867	0.973	0.917				0.953	0.974	1.081	1.017	0.952	1.02	1.008		0.833	0.982	0.974		0.813	0.909	0.899				0.953	0.974	1.081	1.017	0.961
									0.954	0.972	1.083	1.017	0.95	0.932	0.998	0.986	0.888	0.901	1.001	0.985	0.866	0.972	0.917				0.954	0.972	1.083	1.017	0.951	1.019	1.009		0.834	0.983	0.975		0.81	0.91	0.899				0.954	0.972	1.083	1.017	0.961
								7	0.954	0.973	1.083	1.018	0.95	0.931	0.997	0.987	0.887	0.904	1.001	0.985	0.866	0.97	0.914			7	0.954	0.973	1.083	1.018	0.949	1.018	1.01		0.832	0.982	0.977		0.809	0.909	0.899			7	0.954	0.973	1.083	1.018	0.96
									0.955	0.976	1.082	1.018	0.952	0.933	0.997	0.988	0.887	0.906	1.001	0.986	0.867	0.969	0.913				0.955	0.976	1.082	1.018	0.95	1.018	1.011		0.832	0.983	0.977		0.81	0.91	0.899				0.955	0.976	1.082	1.018	0.96
									0.955	0.978	1.082	1.017	0.952	0.934	0.996	0.989	0.886	0.907	1.001	0.987	0.867	0.966	0.914				0.955	0.978	1.082	1.017	0.949	1.019	1.014		0.832	0.983	0.977		0.81	0.91	0.9				0.955	0.978	1.082	1.017	0.96
									0.956	0.98	1.082	1.019	0.951	0.935	0.996	0.991	0.887	0.906	1	0.989	0.867	0.965	0.915				0.956	0.98	1.082	1.019	0.949	1.021	1.014		0.832	0.983	0.977		0.81	0.909	0.901				0.956	0.98	1.082	1.019	0.96
									0.956	0.982	1.083	1.02	0.95	0.935	0.996	0.995	0.888	0.906	1	0.993	0.867	0.964	0.918				0.956	0.982	1.083	1.02	0.949	1.021	1.015		0.827	0.982	0.978		0.809	0.909	0.902				0.956	0.982	1.083	1.02	0.957
									0.954	0.979	1.083	1.021	0.95	0.935	0.995	0.992	0.886	0.907	1.001	0.991	0.865	0.963	0.915				0.954	0.979	1.083	1.021	0.948	1.019	1.017		0.83	0.983	0.979		0.808	0.909	0.901				0.954	0.979	1.083	1.021	0.955
									0.956	0.981	1.084	1.02	0.951	0.936	0.995	0.991	0.884	0.908	1.002	0.992	0.866	0.964	0.914				0.956	0.981	1.084	1.02	0.95	1.019	1.018		0.825	0.983	0.979		0.808	0.908	0.9				0.956	0.981	1.084	1.02	0.958
									0.956	0.98	1.087	1.022	0.95	0.936	0.995	0.992	0.887	0.909	1.001	0.993	0.863	0.964	0.916				0.956	0.98	1.087	1.022	0.948	1.021	1.018		0.826	0.982	0.978		0.807	0.908	0.9				0.956	0.98	1.087	1.022	0.956
									0.957	0.98	1.087	1.024	0.949	0.937	0.994	0.994	0.886	0.911	1.003	0.994	0.862	0.964	0.915				0.957	0.98	1.087	1.024	0.947	1.021	1.019		0.825	0.981	0.979		0.807	0.906	0.9				0.957	0.98	1.087	1.024	0.956
									0.961	0.975	1.086	1.022	0.947	0.935	0.993	0.995	0.885	0.909	1.004	0.995	0.858	0.964	0.914				0.961	0.975	1.086	1.022	0.946	1.022	1.019		0.828	0.98	0.98		0.805	0.905	0.898				0.961	0.975	1.086	1.022	0.955
									0.956	0.978	1.087	1.021	0.95	0.939	0.994	0.993	0.883	0.914	1.004	0.994	0.861	0.965	0.915				0.956	0.978	1.087	1.021	0.944	1.022	1.02		0.821	0.98	0.982		0.806	0.903	0.897				0.956	0.978	1.087	1.021	0.956
									0.953	0.975	1.083	1.025	0.945	0.938	0.992	0.993	0.88	0.913	1.002	0.996	0.858	0.961	0.916				0.953	0.975	1.083	1.025	0.945	1.018	1.021		0.821	0.977	0.981		0.801	0.901	0.896				0.953	0.975	1.083	1.025	0.954
									0.953	0.975	1.081	1.023	0.945	0.938	0.991	0.993	0.879	0.914	0.999	0.998	0.857	0.962	0.916				0.953	0.975	1.081	1.023	0.942	1.014	1.022		0.823	0.975	0.981		0.804	0.903	0.895				0.953	0.975	1.081	1.023	0.95
									0.955	0.975	1.085	1.024	0.944	0.938	0.995	0.995	0.88	0.915	1.001	0.999	0.856	0.962	0.916				0.955	0.975	1.085	1.024	0.942	1.018	1.02		0.82	0.98	0.981		0.806	0.904	0.894				0.955	0.975	1.085	1.024	0.949
									0.956	0.978	1.087	1.027	0.946	0.939	0.994	0.995	0.879	0.916	1.005	0.999	0.857	0.965	0.916				0.956	0.978	1.087	1.027	0.944	1.019	1.021		0.82	0.977	0.981		0.803	0.905	0.893				0.956	0.978	1.087	1.027	0.948
									0.956	0.978	1.089	1.026	0.945	0.937	0.996	0.994	0.88	0.916	1.006	0.998	0.858	0.966	0.916				0.956	0.978	1.089	1.026	0.943	1.021	1.022		0.819	0.978	0.982		0.806	0.905	0.894				0.956	0.978	1.089	1.026	0.948
									0.957	0.981	1.086	1.027	0.945	0.937	0.995	0.995	0.879	0.915	1.004	0.998	0.857	0.961	0.918				0.957	0.981	1.086	1.027	0.944	1.02	1.021		0.818	0.976	0.982		0.806	0.904	0.895				0.957	0.981	1.086	1.027	0.949
									0.957	0.983	1.087	1.029	0.945	0.937	0.996	0.994	0.878	0.917	1.005	0.998	0.857	0.961	0.919				0.957	0.983	1.087	1.029	0.944	1.02	1.021		0.818	0.975	0.981		0.807	0.905	0.895				0.957	0.983	1.087	1.029	0.947
									0.96	0.983	1.089	1.032	0.95	0.938	0.998	0.998	0.881	0.918	1.007	1.001	0.858	0.962	0.92				0.96	0.983	1.089	1.032	0.944	1.019	1.02		0.817	0.974	0.983		0.808	0.904	0.895				0.96	0.983	1.089	1.032	0.947
									0.957	0.984	1.088	1.031	0.947	0.937	0.998	0.996	0.878	0.918	1.008	1.001	0.858	0.962	0.921				0.957	0.984	1.088	1.031	0.944	1.019	1.025		0.817	0.975	0.981		0.809	0.903	0.895				0.957	0.984	1.088	1.031	0.946
									0.957	0.986	1.09	1.031	0.947	0.938	0.997	0.999	0.878	0.92	1.009	1.004	0.86	0.961	0.922				0.957	0.986	1.09	1.031	0.945	1.02	1.024		0.817	0.975	0.979		0.81	0.904	0.895				0.957	0.986	1.09	1.031	0.946
									0.957	0.988	1.093	1.034	0.946	0.939	0.996	1	0.877	0.92	1.01	1.006	0.861	0.96	0.924				0.957	0.988	1.093	1.034	0.945	1.019	1.027		0.816	0.976	0.98		0.81	0.904	0.899				0.957	0.988	1.093	1.034	0.946
									0.959	0.989	1.093	1.035	0.947	0.939	0.995	1.003	0.877	0.921	1.011	1.007	0.861	0.959	0.927				0.959	0.989	1.093	1.035	0.946	1.019	1.028		0.815	0.976	0.982		0.81	0.904	0.9				0.959	0.989	1.093	1.035	0.945
									0.96	0.99	1.093	1.035	0.947	0.94	0.995	1.005	0.876	0.92	1.011	1.006	0.862	0.959	0.927				0.96	0.99	1.093	1.035	0.944	1.017	1.028		0.814	0.976	0.981		0.809	0.904	0.898				0.96	0.99	1.093	1.035	0.945
									0.961	0.992	1.095	1.031	0.947	0.939	0.996	0.999	0.878	0.919	1.011	1.002	0.862	0.96	0.922				0.961	0.992	1.095	1.031	0.944	1.018	1.026		0.813	0.976	0.982		0.808	0.902	0.893				0.961	0.992	1.095	1.031	0.946
									0.962	0.993	1.094	1.027	0.947	0.94	0.993	1.004	0.878	0.917	1.009	1.001	0.861	0.958	0.921				0.962	0.993	1.094	1.027	0.945	1.019	1.021		0.81	0.975	0.977		0.807	0.9	0.891				0.962	0.993	1.094	1.027	0.946
									0.963	0.994	1.096	1.025	0.947	0.94	0.993	1	0.879	0.916	1.011	1.001	0.861	0.958	0.92				0.963	0.994	1.096	1.025	0.945	1.017	1.021		0.808	0.973	0.978		0.807	0.898	0.889				0.963	0.994	1.096	1.025	0.946
									0.962	0.994	1.095	1.027	0.946	0.941	0.993	1.002	0.881	0.916	1.011	1.002	0.862	0.96	0.923				0.962	0.994	1.095	1.027	0.944	1.018	1.02		0.808	0.973	0.98		0.807	0.897	0.89				0.962	0.994	1.095	1.027	0.946
									0.961	0.995	1.097	1.027	0.945	0.942	0.993	1.004	0.88	0.917	1.011	1.002	0.864	0.958	0.924				0.961	0.995	1.097	1.027	0.945	1.019	1.021		0.807	0.972	0.981		0.807	0.898	0.887				0.961	0.995	1.097	1.027	0.948
									0.961	0.996	1.098	1.028	0.946	0.945	0.993	1.005	0.88	0.918	1.011	1.002	0.865	0.96	0.926				0.961	0.996	1.098	1.028	0.944	1.02	1.023		0.807	0.971	0.981		0.807	0.899	0.886				0.961	0.996	1.098	1.028	0.948
								8	0.962	0.998	1.099	1.028	0.946	0.946	0.993	1.006	0.88	0.919	1.011	1	0.866	0.96	0.925			8	0.962	0.998	1.099	1.028	0.945	1.021	1.024		0.807	0.972	0.982		0.807	0.899	0.886			8	0.962	0.998	1.099	1.028	0.947
									0.962	0.997	1.1	1.028	0.947	0.944	0.992	1.007	0.879	0.918	1.01	1.001	0.866	0.959	0.924				0.962	0.997	1.1	1.028	0.945	1.021	1.025		0.808	0.972	0.983		0.807	0.9	0.885				0.962	0.997	1.1	1.028	0.947
									0.962	0.997	1.102	1.029	0.949	0.943	0.992	1.009	0.88	0.918	1.01	1.003	0.866	0.96	0.924				0.962	0.997	1.102	1.029	0.946	1.021	1.025		0.808	0.971	0.983		0.807	0.899	0.885				0.962	0.997	1.102	1.029	0.947
									0.963	0.997	1.103	1.028	0.948	0.945	0.993	1.008	0.879	0.918	1.009	1.003	0.867	0.96	0.924				0.963	0.997	1.103	1.028	0.947	1.02	1.026		0.808	0.972	0.983		0.805	0.899	0.883				0.963	0.997	1.103	1.028	0.946
									0.964	1	1.104	1.027	0.948	0.947	0.994	1.007	0.879	0.922	1.01	1.004	0.869	0.96	0.926				0.964	1	1.104	1.027	0.947	1.021	1.027		0.808	0.971	0.984		0.805	0.897	0.883				0.964	1	1.104	1.027	0.945
									0.964	0.993	1.106	1.029	0.948	0.944	0.994	1.008	0.879	0.918	1.012	1.003	0.867	0.96	0.926				0.964	0.993	1.106	1.029	0.947	1.021	1.028		0.808	0.971	0.984		0.8	0.895	0.882				0.964	0.993	1.106	1.029	0.945
									0.964	0.996	1.106	1.029	0.948	0.949	0.997	1.007	0.879	0.922	1.012	1.001	0.87	0.96	0.926				0.964	0.996	1.106	1.029	0.947	1.021	1.028		0.809	0.973	0.984		0.802	0.894	0.881				0.964	0.996	1.106	1.029	0.946
									0.964	0.998	1.104	1.03	0.948	0.948	0.993	1.009	0.879	0.922	1.009	1	0.871	0.958	0.926				0.964	0.998	1.104	1.03	0.946	1.022	1.027		0.807	0.972	0.984		0.802	0.891	0.879				0.964	0.998	1.104	1.03	0.946
									0.963	0.998	1.101	1.029	0.949	0.949	0.993	1.009	0.879	0.923	1.005	1	0.87	0.957	0.927				0.963	0.998	1.101	1.029	0.946	1.021	1.028		0.807	0.968	0.986		0.803	0.887	0.88				0.963	0.998	1.101	1.029	0.946
									0.963	0.996	1.103	1.032	0.949	0.948	0.994	1.01	0.879	0.921	1.007	0.999	0.868	0.959	0.928				0.963	0.996	1.103	1.032	0.946	1.019	1.028		0.807	0.967	0.986		0.802	0.889	0.879				0.963	0.996	1.103	1.032	0.946
									0.963	0.994	1.104	1.033	0.949	0.946	0.995	1.011	0.879	0.92	1.011	0.999	0.869	0.961	0.929				0.963	0.994	1.104	1.033	0.946	1.021	1.029		0.806	0.966	0.986		0.8	0.887	0.879				0.963	0.994	1.104	1.033	0.945
									0.963	0.993	1.102	1.034	0.95	0.947	0.995	1.011	0.88	0.921	1.01	1	0.869	0.963	0.929				0.963	0.993	1.102	1.034	0.946	1.017	1.029		0.805	0.966	0.985		0.798	0.887	0.879				0.963	0.993	1.102	1.034	0.946
									0.963	0.998	1.102	1.034	0.949	0.948	0.995	1.011	0.88	0.92	1.01	1	0.871	0.962	0.93				0.963	0.998	1.102	1.034	0.947	1.018	1.03		0.805	0.968	0.987		0.798	0.885	0.879				0.963	0.998	1.102	1.034	0.946
									0.963	0.995	1.104	1.033	0.949	0.949	1.001	1.013	0.88	0.922	1.016	1.001	0.866	0.964	0.93				0.963	0.995	1.104	1.033	0.947	1.019	1.029		0.805	0.967	0.988		0.793	0.888	0.879				0.963	0.995	1.104	1.033	0.945
									0.963	0.993	1.101	1.033	0.949	0.948	0.995	1.014	0.882	0.922	1.011	1	0.866	0.958	0.93				0.963	0.993	1.101	1.033	0.946	1.02	1.031		0.805	0.966	0.987		0.793	0.883	0.879				0.963	0.993	1.101	1.033	0.945
									0.963	0.993	1.102	1.035	0.949	0.947	0.994	1.014	0.882	0.923	1.009	1.001	0.865	0.958	0.93				0.963	0.993	1.102	1.035	0.945	1.016	1.031		0.805	0.968	0.987		0.792	0.882	0.878				0.963	0.993	1.102	1.035	0.945
									0.966	0.993	1.103	1.036	0.949	0.945	0.993	1.015	0.885	0.923	1.009	1	0.863	0.959	0.931				0.966	0.993	1.103	1.036	0.944	1.017	1.031		0.803	0.967	0.988		0.792	0.882	0.877				0.966	0.993	1.103	1.036	0.944
									0.965	0.997	1.105	1.036	0.947	0.948	0.993	1.015	0.883	0.923	1.008	1.001	0.863	0.96	0.931				0.965	0.997	1.105	1.036	0.945	1.017	1.03		0.803	0.967	0.988		0.793	0.882	0.876				0.965	0.997	1.105	1.036	0.944
									0.965	0.998	1.108	1.037	0.947	0.947	0.994	1.016	0.883	0.923	1.008	1.003	0.864	0.961	0.931				0.965	0.998	1.108	1.037	0.945	1.018	1.031		0.802	0.968	0.989		0.792	0.88	0.875				0.965	0.998	1.108	1.037	0.944
									0.966	0.998	1.107	1.039	0.946	0.947	0.996	1.015	0.884	0.924	1.006	1.002	0.867	0.962	0.93				0.966	0.998	1.107	1.039	0.943	1.02	1.032		0.801	0.969	0.99		0.791	0.879	0.874				0.966	0.998	1.107	1.039	0.945
									0.965	0.999	1.108	1.038	0.945	0.948	0.996	1.015	0.884	0.924	1.006	1.002	0.867	0.963	0.929				0.965	0.999	1.108	1.038	0.945	1.019	1.032		0.801	0.969	0.991		0.79	0.879	0.873				0.965	0.999	1.108	1.038	0.946
									0.966	1	1.11	1.039	0.946	0.948	0.995	1.016	0.884	0.924	1.009	1.004	0.867	0.963	0.929				0.966	1	1.11	1.039	0.945	1.021	1.033		0.801	0.97	0.992		0.79	0.878	0.872				0.966	1	1.11	1.039	0.946
									0.966	1	1.11	1.04	0.944	0.949	0.997	1.018	0.883	0.923	1.007	1.007	0.869	0.963	0.931				0.966	1	1.11	1.04	0.945	1.021	1.034		0.801	0.97	0.993		0.79	0.878	0.872				0.966	1	1.11	1.04	0.945
									0.965	1.002	1.109	1.034	0.943	0.948	0.996	1.015	0.884	0.924	1.008	1.001	0.869	0.963	0.928				0.965	1.002	1.109	1.034	0.945	1.022	1.035		0.8	0.97	0.99		0.789	0.877	0.866				0.965	1.002	1.109	1.034	0.944
									0.965	1.002	1.11	1.034	0.943	0.947	0.996	1.013	0.884	0.924	1.006	1.007	0.87	0.963	0.931				0.965	1.002	1.11	1.034	0.946	1.023	1.03		0.8	0.97	0.992		0.789	0.876	0.869				0.965	1.002	1.11	1.034	0.945
									0.964	1.004	1.112	1.035	0.943	0.948	0.997	1.014	0.884	0.922	1.006	1.006	0.87	0.964	0.93				0.964	1.004	1.112	1.035	0.945	1.021	1.029		0.8	0.971	0.989		0.788	0.878	0.868				0.964	1.004	1.112	1.035	0.945
									0.964	1.005	1.113	1.029	0.943	0.949	0.997	1.014	0.884	0.921	1.007	1.005	0.871	0.965	0.929				0.964	1.005	1.113	1.029	0.947	1.021	1.028		0.801	0.972	0.988		0.788	0.877	0.869				0.964	1.005	1.113	1.029	0.945
									0.966	1.004	1.114	1.034	0.943	0.949	0.998	1.013	0.884	0.921	1.008	1.003	0.871	0.966	0.929				0.966	1.004	1.114	1.034	0.946	1.02	1.029		0.8	0.974	0.989		0.788	0.876	0.866				0.966	1.004	1.114	1.034	0.944
									0.967	1.005	1.116	1.027	0.944	0.95	0.997	1.017	0.884	0.921	1.009	1.006	0.871	0.967	0.933				0.967	1.005	1.116	1.027	0.946	1.021	1.03		0.799	0.975	0.994		0.789	0.875	0.864				0.967	1.005	1.116	1.027	0.943
									0.967	1.004	1.117	1.03	0.945	0.949	0.997	1.015	0.884	0.922	1.007	1.004	0.871	0.966	0.932				0.967	1.004	1.117	1.03	0.947	1.02	1.035		0.8	0.976	0.992		0.789	0.873	0.863				0.967	1.004	1.117	1.03	0.944
								9	0.968	1.007	1.118	1.032	0.945	0.95	0.998	1.017	0.884	0.923	1.006	1.002	0.87	0.967	0.931			9	0.968	1.007	1.118	1.032	0.947	1.02	1.031		0.799	0.978	0.991		0.789	0.872	0.859			9	0.968	1.007	1.118	1.032	0.943
									0.969	1.007	1.119	1.032	0.945	0.951	0.998	1.017	0.885	0.924	1.004	1.007	0.869	0.966	0.931				0.969	1.007	1.119	1.032	0.946	1.021	1.031		0.8	0.978	0.991		0.789	0.872	0.86				0.969	1.007	1.119	1.032	0.942
									0.97	1.009	1.12	1.031	0.945	0.953	0.997	1.018	0.885	0.925	1.004	1.002	0.87	0.965	0.933				0.97	1.009	1.12	1.031	0.946	1.023	1.031		0.801	0.977	0.988		0.791	0.872	0.861				0.97	1.009	1.12	1.031	0.941
									0.971	1.007	1.122	1.032	0.945	0.952	0.998	1.017	0.885	0.923	1.006	1.001	0.87	0.964	0.927				0.971	1.007	1.122	1.032	0.946	1.022	1.033		0.8	0.978	0.986		0.791	0.872	0.858				0.971	1.007	1.122	1.032	0.94
									0.971	1.007	1.124	1.034	0.946	0.953	0.999	1.019	0.885	0.922	1.006	1.001	0.873	0.963	0.93				0.971	1.007	1.124	1.034	0.947	1.022	1.034		0.8	0.98	0.988		0.789	0.874	0.86				0.971	1.007	1.124	1.034	0.94
									0.971	1.008	1.127	1.029	0.946	0.954	1	1.016	0.886	0.923	1.006	0.999	0.873	0.963	0.928				0.971	1.008	1.127	1.029	0.948	1.026	1.032		0.798	0.981	0.99		0.79	0.875	0.859				0.971	1.008	1.127	1.029	0.939
									0.971	1.008	1.132	1.028	0.946	0.954	1.002	1.016	0.886	0.923	1.006	1	0.874	0.965	0.929				0.971	1.008	1.132	1.028	0.948	1.027	1.031		0.799	0.984	0.992		0.791	0.877	0.855				0.971	1.008	1.132	1.028	0.939
									0.972	1.009	1.131	1.029	0.945	0.955	0.999	1.016	0.885	0.924	1.004	1	0.875	0.963	0.929				0.972	1.009	1.131	1.029	0.949	1.029	1.035		0.798	0.982	0.992		0.791	0.877	0.852				0.972	1.009	1.131	1.029	0.939
									0.972	1.01	1.134	1.032	0.945	0.956	1	1.019	0.886	0.924	1.006	0.998	0.876	0.965	0.927				0.972	1.01	1.134	1.032	0.948	1.028	1.033		0.798	0.984	0.996		0.791	0.877	0.856				0.972	1.01	1.134	1.032	0.939
									0.972	1.011	1.138	1.027	0.947	0.956	1	1.016	0.886	0.925	1.003	0.995	0.877	0.967	0.93				0.972	1.011	1.138	1.027	0.947	1.029	1.037		0.797	0.984	0.991		0.793	0.878	0.85				0.972	1.011	1.138	1.027	0.938
									0.973	1.012	1.14	1.025	0.947	0.957	1.001	1.016	0.887	0.923	1.003	0.998	0.877	0.968	0.929				0.973	1.012	1.14	1.025	0.948	1.029	1.031		0.797	0.983	0.991		0.791	0.878	0.848				0.973	1.012	1.14	1.025	0.938
									0.972	1.013	1.14	1.026	0.948	0.958	1.001	1.019	0.887	0.924	1.001	0.996	0.878	0.969	0.929				0.972	1.013	1.14	1.026	0.947	1.029	1.036		0.796	0.984	0.993		0.789	0.879	0.85				0.972	1.013	1.14	1.026	0.938
									0.971	1.016	1.141	1.031	0.949	0.959	1.001	1.017	0.888	0.925	1.001	0.998	0.878	0.969	0.929				0.971	1.016	1.141	1.031	0.946	1.03	1.038		0.796	0.984	0.997		0.789	0.878	0.848				0.971	1.016	1.141	1.031	0.94
									0.97	1.02	1.142	1.027	0.95	0.961	1.004	1.014	0.888	0.926	1.001	0.998	0.881	0.97	0.927				0.97	1.02	1.142	1.027	0.946	1.029	1.034		0.796	0.984	0.995		0.79	0.878	0.85				0.97	1.02	1.142	1.027	0.94
									0.97	1.021	1.143	1.032	0.95	0.962	1.005	1.015	0.889	0.926	0.998	1	0.882	0.97	0.929				0.97	1.021	1.143	1.032	0.946	1.031	1.038		0.796	0.984	0.996		0.789	0.877	0.849				0.97	1.021	1.143	1.032	0.939
									0.971	1.022	1.144	1.029	0.95	0.962	1.006	1.014	0.888	0.927	0.998	1	0.881	0.97	0.926				0.971	1.022	1.144	1.029	0.946	1.031	1.039		0.795	0.986	0.996		0.788	0.876	0.849				0.971	1.022	1.144	1.029	0.938
									0.971	1.022	1.145	1.027	0.951	0.963	1.006	1.016	0.888	0.927	0.998	0.996	0.88	0.97	0.927				0.971	1.022	1.145	1.027	0.947	1.031	1.039		0.793	0.987	0.995		0.786	0.875	0.851				0.971	1.022	1.145	1.027	0.938
									0.97	1.021	1.144	1.025	0.951	0.961	1.006	1.012	0.888	0.924	0.996	0.997	0.878	0.967	0.925				0.97	1.021	1.144	1.025	0.946	1.029	1.039		0.792	0.983	0.998		0.786	0.873	0.849				0.97	1.021	1.144	1.025	0.938
									0.972	1.024	1.144	1.025	0.952	0.962	1.005	1.015	0.889	0.926	0.995	0.998	0.879	0.967	0.927				0.972	1.024	1.144	1.025	0.946	1.03	1.037		0.791	0.982	0.996		0.785	0.873	0.85				0.972	1.024	1.144	1.025	0.938
									0.973	1.026	1.143	1.026	0.953	0.963	1.005	1.017	0.888	0.927	0.995	0.998	0.88	0.968	0.927				0.973	1.026	1.143	1.026	0.945	1.029	1.039		0.79	0.982	0.999		0.786	0.873	0.848				0.973	1.026	1.143	1.026	0.939
									0.972	1.026	1.144	1.028	0.953	0.963	1.006	1.016	0.887	0.926	0.995	0.995	0.881	0.969	0.925				0.972	1.026	1.144	1.028	0.944	1.03	1.037		0.79	0.983	0.999		0.786	0.873	0.846				0.972	1.026	1.144	1.028	0.939
									0.972	1.025	1.144	1.027	0.953	0.961	1.005	1.017	0.887	0.925	0.996	0.997	0.881	0.969	0.922				0.972	1.025	1.144	1.027	0.944	1.032	1.038		0.79	0.983	0.998		0.786	0.872	0.846				0.972	1.025	1.144	1.027	0.939
									0.974	1.028	1.145	1.032	0.954	0.964	1.004	1.018	0.888	0.928	0.994	0.996	0.883	0.969	0.924				0.974	1.028	1.145	1.032	0.944	1.032	1.039		0.79	0.983	0.997		0.784	0.872	0.844				0.974	1.028	1.145	1.032	0.94
									0.975	1.028	1.146	1.029	0.953	0.963	1.005	1.016	0.889	0.929	0.994	0.993	0.883	0.969	0.923				0.975	1.028	1.146	1.029	0.944	1.032	1.041		0.789	0.983	0.996		0.784	0.872	0.842				0.975	1.028	1.146	1.029	0.94
									0.976	1.029	1.148	1.029	0.953	0.963	1.006	1.015	0.89	0.929	0.994	0.994	0.882	0.968	0.926				0.976	1.029	1.148	1.029	0.944	1.031	1.039		0.789	0.984	0.998		0.784	0.872	0.841				0.976	1.029	1.148	1.029	0.939
									0.977	1.027	1.151	1.029	0.952	0.96	1.006	1.016	0.89	0.927	0.995	0.995	0.88	0.969	0.926				0.977	1.027	1.151	1.029	0.944	1.029	1.04		0.789	0.984	0.998		0.784	0.871	0.841				0.977	1.027	1.151	1.029	0.939
									0.976	1.029	1.153	1.028	0.953	0.96	1.006	1.013	0.891	0.927	0.995	0.992	0.879	0.968	0.924				0.976	1.029	1.153	1.028	0.943	1.029	1.04		0.788	0.985	0.998		0.783	0.87	0.843				0.976	1.029	1.153	1.028	0.94
									0.976	1.029	1.154	1.028	0.952	0.962	1.007	1.012	0.891	0.928	0.994	0.994	0.879	0.967	0.925				0.976	1.029	1.154	1.028	0.942	1.027	1.04		0.789	0.986	0.998		0.782	0.869	0.843				0.976	1.029	1.154	1.028	0.94
									0.976	1.028	1.154	1.026	0.952	0.96	1.007	1.015	0.892	0.927	0.994	0.994	0.88	0.965	0.924				0.976	1.028	1.154	1.026	0.941	1.027	1.04		0.789	0.987	0.998		0.782	0.868	0.843				0.976	1.028	1.154	1.026	0.94
									0.976	1.027	1.156	1.025	0.951	0.958	1.009	1.015	0.892	0.925	0.994	0.993	0.879	0.965	0.923				0.976	1.027	1.156	1.025	0.94	1.024	1.041		0.79	0.987	0.998		0.782	0.868	0.846				0.976	1.027	1.156	1.025	0.94
								10	0.976	1.029	1.159	1.027	0.951	0.959	1.008	1.011	0.892	0.928	0.993	0.994	0.879	0.964	0.925			10	0.976	1.029	1.159	1.027	0.941	1.025	1.042		0.79	0.988	0.998		0.783	0.868	0.844			10	0.976	1.029	1.159	1.027	0.94
									0.976	1.03	1.162	1.028	0.951	0.959	1.008	1.012	0.892	0.932	0.992	0.994	0.879	0.964	0.924				0.976	1.03	1.162	1.028	0.941	1.024	1.043		0.79	0.989	1		0.784	0.869	0.846				0.976	1.03	1.162	1.028	0.941
									0.977	1.031	1.164	1.027	0.952	0.959	1.01	1.011	0.892	0.931	0.994	0.995	0.878	0.963	0.925				0.977	1.031	1.164	1.027	0.942	1.024	1.043		0.79	0.99	1.002		0.783	0.87	0.846				0.977	1.031	1.164	1.027	0.942
									0.977	1.035	1.166	1.028	0.952	0.96	1.009	1.012	0.893	0.933	0.994	0.996	0.879	0.964	0.924				0.977	1.035	1.166	1.028	0.941	1.024	1.042		0.789	0.993	1.003		0.785	0.867	0.848				0.977	1.035	1.166	1.028	0.941
									0.979	1.035	1.167	1.027	0.954	0.962	1.009	1.011	0.894	0.935	0.992	0.996	0.877	0.963	0.923				0.979	1.035	1.167	1.027	0.941	1.024	1.043		0.789	0.993	1.002		0.787	0.869	0.847				0.979	1.035	1.167	1.027	0.941
									0.981	1.037	1.169	1.027	0.956	0.963	1.009	1.011	0.893	0.935	0.993	0.996	0.879	0.964	0.923				0.981	1.037	1.169	1.027	0.942	1.025	1.045		0.788	0.995	1.001		0.788	0.87	0.846				0.981	1.037	1.169	1.027	0.942
									0.982	1.037	1.171	1.027	0.956	0.964	1.007	1.009	0.893	0.937	0.992	0.997	0.879	0.964	0.923				0.982	1.037	1.171	1.027	0.942	1.025	1.045		0.788	0.995	1.001		0.786	0.869	0.847				0.982	1.037	1.171	1.027	0.941
									0.982	1.035	1.172	1.027	0.956	0.962	1.007	1.008	0.893	0.936	0.994	0.997	0.877	0.966	0.925				0.982	1.035	1.172	1.027	0.942	1.024	1.045		0.788	0.995	1.002		0.784	0.868	0.848				0.982	1.035	1.172	1.027	0.941
									0.982	1.038	1.175	1.026	0.956	0.966	1.005	1.008	0.893	0.938	0.994	0.998	0.877	0.965	0.924				0.982	1.038	1.175	1.026	0.942	1.025	1.045		0.788	0.995	1.003		0.789	0.868	0.849				0.982	1.038	1.175	1.026	0.941
									0.983	1.039	1.176	1.027	0.956	0.967	1.005	1.008	0.894	0.938	0.993	0.998	0.878	0.965	0.924				0.983	1.039	1.176	1.027	0.944	1.026	1.045		0.788	0.995	1.002		0.788	0.868	0.848				0.983	1.039	1.176	1.027	0.94
									0.983	1.04	1.178	1.028	0.957	0.966	1.003	1.008	0.894	0.937	0.993	0.998	0.878	0.964	0.925				0.983	1.04	1.178	1.028	0.944	1.027	1.046		0.787	0.996	1.001		0.788	0.869	0.848				0.983	1.04	1.178	1.028	0.94
									0.983	1.041	1.177	1.026	0.957	0.966	1.004	1.01	0.894	0.937	0.995	0.998	0.878	0.964	0.923				0.983	1.041	1.177	1.026	0.944	1.027	1.047		0.786	0.995	1.001		0.788	0.87	0.848				0.983	1.041	1.177	1.026	0.939
									0.985	1.041	1.179	1.026	0.958	0.966	1.004	1.011	0.895	0.935	0.994	1	0.879	0.963	0.923				0.985	1.041	1.179	1.026	0.943	1.027	1.047		0.786	0.994	1.002		0.789	0.869	0.848				0.985	1.041	1.179	1.026	0.941
									0.987	1.042	1.181	1.026	0.958	0.966	1.005	1.011	0.895	0.934	0.993	1	0.878	0.962	0.924				0.987	1.042	1.181	1.026	0.944	1.027	1.047		0.785	0.994	1.003		0.788	0.869	0.85				0.987	1.042	1.181	1.026	0.94
									0.988	1.043	1.18	1.025	0.957	0.967	1.004	1.012	0.895	0.935	0.993	1	0.88	0.961	0.925				0.988	1.043	1.18	1.025	0.943	1.028	1.048		0.785	0.992	1.001		0.787	0.87	0.849				0.988	1.043	1.18	1.025	0.94
									0.987	1.044	1.182	1.027	0.958	0.969	1.004	1.012	0.894	0.935	0.993	1	0.881	0.96	0.925				0.987	1.044	1.182	1.027	0.943	1.028	1.05		0.783	0.991	1		0.785	0.87	0.848				0.987	1.044	1.182	1.027	0.94
									0.988	1.045	1.184	1.026	0.958	0.969	1.006	1.013	0.895	0.935	0.994	1.001	0.882	0.963	0.926				0.988	1.045	1.184	1.026	0.943	1.028	1.051		0.783	0.989	0.999		0.785	0.87	0.847				0.988	1.045	1.184	1.026	0.941
									0.989	1.046	1.185	1.026	0.958	0.967	1.005	1.013	0.897	0.935	0.992	1	0.882	0.961	0.925				0.989	1.046	1.185	1.026	0.943	1.027	1.052		0.783	0.987	0.999		0.784	0.868	0.845				0.989	1.046	1.185	1.026	0.943
									0.989	1.048	1.187	1.027	0.958	0.967	1.007	1.013	0.896	0.935	0.991	0.999	0.882	0.962	0.926				0.989	1.048	1.187	1.027	0.942	1.027	1.053		0.782	0.985	0.997		0.784	0.868	0.846				0.989	1.048	1.187	1.027	0.943
									0.99	1.049	1.187	1.029	0.959	0.966	1.007	1.013	0.896	0.936	0.991	0.999	0.882	0.963	0.926				0.99	1.049	1.187	1.029	0.941	1.027	1.053		0.782	0.986	0.996		0.783	0.866	0.846				0.99	1.049	1.187	1.029	0.943
									0.989	1.051	1.182	1.029	0.958	0.967	1.004	1.014	0.896	0.938	0.986	0.999	0.883	0.959	0.927				0.989	1.051	1.182	1.029	0.942	1.029	1.053		0.782	0.987	0.996		0.783	0.865	0.846				0.989	1.051	1.182	1.029	0.942
									0.99	1.052	1.184	1.031	0.96	0.968	1.008	1.015	0.896	0.938	0.986	1	0.883	0.962	0.93				0.99	1.052	1.184	1.031	0.942	1.023	1.053		0.781	0.985	0.996		0.784	0.865	0.847				0.99	1.052	1.184	1.031	0.942
									0.991	1.053	1.183	1.029	0.96	0.968	1.007	1.016	0.896	0.938	0.987	0.998	0.884	0.959	0.931				0.991	1.053	1.183	1.029	0.943	1.022	1.052		0.78	0.986	0.997		0.783	0.863	0.848				0.991	1.053	1.183	1.029	0.942
									0.99	1.054	1.186	1.028	0.96	0.969	1.008	1.017	0.896	0.939	0.987	0.998	0.884	0.959	0.932				0.99	1.054	1.186	1.028	0.943	1.022	1.051		0.78	0.986	0.999		0.783	0.862	0.848				0.99	1.054	1.186	1.028	0.943
									0.989	1.054	1.187	1.029	0.959	0.968	1.009	1.019	0.896	0.94	0.987	0.997	0.885	0.959	0.932				0.989	1.054	1.187	1.029	0.944	1.021	1.052		0.78	0.989	0.999		0.782	0.862	0.847				0.989	1.054	1.187	1.029	0.942
									0.989	1.056	1.191	1.03	0.957	0.967	1.008	1.02	0.897	0.941	0.988	0.999	0.887	0.958	0.932				0.989	1.056	1.191	1.03	0.944	1.02	1.052		0.779	0.99	0.999		0.781	0.863	0.847				0.989	1.056	1.191	1.03	0.942
									0.989	1.056	1.192	1.034	0.957	0.968	1.007	1.021	0.897	0.94	0.989	1.001	0.888	0.96	0.932				0.989	1.056	1.192	1.034	0.944	1.022	1.054		0.778	0.991	0.999		0.78	0.865	0.847				0.989	1.056	1.192	1.034	0.943
									0.989	1.056	1.194	1.031	0.958	0.969	1.008	1.019	0.897	0.94	0.988	0.997	0.889	0.96	0.929				0.989	1.056	1.194	1.031	0.943	1.021	1.052		0.777	0.993	0.996		0.78	0.865	0.843				0.989	1.056	1.194	1.031	0.943
									0.99	1.059	1.195	1.029	0.959	0.97	1.008	1.021	0.897	0.94	0.987	0.998	0.889	0.961	0.93				0.99	1.059	1.195	1.029	0.944	1.021	1.051		0.776	0.993	0.994		0.779	0.867	0.842				0.99	1.059	1.195	1.029	0.943
									0.989	1.06	1.196	1.029	0.959	0.97	1.01	1.023	0.898	0.94	0.987	1	0.89	0.96	0.93				0.989	1.06	1.196	1.029	0.944	1.022	1.052		0.775	0.994	0.992		0.778	0.867	0.839				0.989	1.06	1.196	1.029	0.943
								11	0.989	1.061	1.195	1.029	0.959	0.97	1.011	1.023	0.899	0.941	0.987	1	0.891	0.961	0.932			11	0.989	1.061	1.195	1.029	0.944	1.024	1.053		0.775	0.994	0.992		0.776	0.866	0.839			11	0.989	1.061	1.195	1.029	0.944
									0.989	1.061	1.198	1.03	0.959	0.97	1.011	1.022	0.897	0.943	0.988	1.003	0.891	0.963	0.931				0.989	1.061	1.198	1.03	0.946	1.026	1.053		0.774	0.995	0.995		0.775	0.866	0.842				0.989	1.061	1.198	1.03	0.943
									0.988	1.06	1.198	1.033	0.959	0.971	1.011	1.017	0.897	0.943	0.989	1.002	0.892	0.962	0.931				0.988	1.06	1.198	1.033	0.947	1.028	1.054		0.774	0.995	0.992		0.776	0.866	0.841				0.988	1.06	1.198	1.033	0.944
									0.988	1.06	1.194	1.029	0.959	0.971	1.009	1.018	0.898	0.943	0.984	1.003	0.891	0.957	0.93				0.988	1.06	1.194	1.029	0.947	1.026	1.052		0.774	0.996	0.991		0.776	0.865	0.84				0.988	1.06	1.194	1.029	0.945
									0.988	1.06	1.196	1.028	0.959	0.97	1.008	1.015	0.899	0.943	0.985	1.003	0.891	0.956	0.932				0.988	1.06	1.196	1.028	0.946	1.026	1.053		0.773	0.994	0.992		0.775	0.866	0.839				0.988	1.06	1.196	1.028	0.945
									0.988	1.061	1.198	1.027	0.959	0.971	1.007	1.017	0.901	0.944	0.986	1.005	0.89	0.956	0.933				0.988	1.061	1.198	1.027	0.947	1.028	1.053		0.773	0.994	0.992		0.775	0.867	0.839				0.988	1.061	1.198	1.027	0.945
									0.987	1.062	1.199	1.025	0.959	0.972	1.007	1.017	0.901	0.945	0.986	1.005	0.89	0.958	0.931				0.987	1.062	1.199	1.025	0.947	1.028	1.054		0.773	0.995	0.991		0.776	0.868	0.838				0.987	1.062	1.199	1.025	0.946
									0.986	1.063	1.2	1.023	0.958	0.972	1.006	1.019	0.902	0.945	0.984	1.007	0.89	0.956	0.934				0.986	1.063	1.2	1.023	0.945	1.029	1.054		0.772	0.995	0.991		0.776	0.868	0.838				0.986	1.063	1.2	1.023	0.946
									0.987	1.064	1.201	1.024	0.959	0.972	1.005	1.018	0.902	0.947	0.984	1.006	0.891	0.956	0.933				0.987	1.064	1.201	1.024	0.946	1.03	1.056		0.772	0.995	0.992		0.776	0.869	0.838				0.987	1.064	1.201	1.024	0.945
									0.986	1.065	1.2	1.024	0.958	0.972	1.006	1.023	0.902	0.948	0.986	1.005	0.891	0.956	0.934				0.986	1.065	1.2	1.024	0.947	1.03	1.054		0.772	0.996	0.99		0.775	0.868	0.839				0.986	1.065	1.2	1.024	0.945
									0.986	1.064	1.201	1.023	0.958	0.973	1.004	1.022	0.903	0.949	0.988	1.006	0.891	0.954	0.934				0.986	1.064	1.201	1.023	0.947	1.029	1.054		0.771	0.996	0.989		0.775	0.867	0.838				0.986	1.064	1.201	1.023	0.945
									0.986	1.065	1.202	1.025	0.958	0.973	1.003	1.024	0.904	0.949	0.989	1.006	0.89	0.954	0.934				0.986	1.065	1.202	1.025	0.948	1.03	1.054		0.769	0.997	0.99		0.775	0.866	0.841				0.986	1.065	1.202	1.025	0.944
									0.986	1.066	1.203	1.022	0.958	0.974	1.001	1.025	0.903	0.95	0.989	1.004	0.89	0.954	0.934				0.986	1.066	1.203	1.022	0.949	1.03	1.055		0.769	0.998	0.991		0.775	0.866	0.84				0.986	1.066	1.203	1.022	0.943
									0.985	1.066	1.206	1.022	0.958	0.973	1.001	1.027	0.903	0.949	0.991	1.005	0.891	0.955	0.934				0.985	1.066	1.206	1.022	0.95	1.029	1.056		0.769	0.999	0.989		0.776	0.865	0.839				0.985	1.066	1.206	1.022	0.943
									0.985	1.067	1.207	1.023	0.959	0.973	1.001	1.027	0.903	0.95	0.993	1.003	0.891	0.955	0.935				0.985	1.067	1.207	1.023	0.949	1.029	1.057		0.769	0.998	0.99		0.775	0.865	0.838				0.985	1.067	1.207	1.023	0.943
									0.983	1.067	1.209	1.024	0.96	0.973	1.001	1.031	0.903	0.95	0.994	1.003	0.891	0.954	0.936				0.983	1.067	1.209	1.024	0.95	1.027	1.059		0.768	0.997	0.99		0.776	0.864	0.838				0.983	1.067	1.209	1.024	0.942
									0.982	1.067	1.21	1.023	0.959	0.972	1.003	1.034	0.903	0.951	0.993	1.006	0.893	0.954	0.937				0.982	1.067	1.21	1.023	0.949	1.026	1.059		0.768	0.997	0.991		0.776	0.863	0.839				0.982	1.067	1.21	1.023	0.943
									0.981	1.068	1.212	1.024	0.959	0.972	1.005	1.033	0.903	0.951	0.993	1.002	0.894	0.955	0.938				0.981	1.068	1.212	1.024	0.948	1.025	1.058		0.768	0.996	0.992		0.776	0.863	0.84				0.981	1.068	1.212	1.024	0.944
									0.982	1.068	1.212	1.023	0.958	0.972	1.006	1.034	0.904	0.951	0.993	1.003	0.895	0.954	0.937				0.982	1.068	1.212	1.023	0.948	1.025	1.057		0.767	0.995	0.992		0.776	0.862	0.84				0.982	1.068	1.212	1.023	0.946
									0.981	1.069	1.213	1.022	0.958	0.971	1.006	1.036	0.904	0.953	0.995	1.002	0.896	0.955	0.937				0.981	1.069	1.213	1.022	0.949	1.025	1.057		0.766	0.996	0.993		0.776	0.862	0.841				0.981	1.069	1.213	1.022	0.946
									0.981	1.068	1.215	1.022	0.958	0.971	1.006	1.037	0.904	0.953	0.994	1.002	0.896	0.955	0.936				0.981	1.068	1.215	1.022	0.949	1.026	1.057		0.766	0.996	0.993		0.777	0.864	0.842				0.981	1.068	1.215	1.022	0.946
									0.982	1.067	1.218	1.022	0.958	0.971	1.006	1.037	0.905	0.952	0.996	1.003	0.897	0.955	0.937				0.982	1.067	1.218	1.022	0.949	1.027	1.057		0.766	0.997	0.994		0.777	0.865	0.842				0.982	1.067	1.218	1.022	0.947
									0.982	1.063	1.218	1.022	0.959	0.965	1.007	1.04	0.905	0.949	0.995	1.003	0.894	0.955	0.937				0.982	1.063	1.218	1.022	0.949	1.027	1.057		0.765	0.998	0.995		0.776	0.865	0.842				0.982	1.063	1.218	1.022	0.947
									0.982	1.064	1.22	1.023	0.96	0.965	1.008	1.039	0.905	0.947	0.997	1.004	0.894	0.956	0.938				0.982	1.064	1.22	1.023	0.949	1.027	1.06		0.765	0.998	0.996		0.772	0.866	0.844				0.982	1.064	1.22	1.023	0.947
									0.981	1.065	1.219	1.021	0.961	0.967	1.008	1.038	0.906	0.949	0.996	1.002	0.894	0.957	0.935				0.981	1.065	1.219	1.021	0.948	1.026	1.06		0.764	0.998	0.995		0.772	0.867	0.841				0.981	1.065	1.219	1.021	0.949
									0.982	1.067	1.219	1.022	0.96	0.969	1.009	1.038	0.906	0.95	0.995	1.004	0.896	0.957	0.938				0.982	1.067	1.219	1.022	0.947	1.025	1.058		0.764	0.996	0.996		0.772	0.865	0.843				0.982	1.067	1.219	1.022	0.949
									0.982	1.07	1.22	1.02	0.961	0.972	1.007	1.038	0.905	0.952	0.998	1.003	0.898	0.957	0.938				0.982	1.07	1.22	1.02	0.946	1.023	1.058		0.764	0.991	0.995		0.775	0.867	0.843				0.982	1.07	1.22	1.02	0.948
									0.982	1.069	1.22	1.022	0.961	0.972	1.007	1.04	0.905	0.952	0.993	1.005	0.898	0.958	0.939				0.982	1.069	1.22	1.022	0.947	1.024	1.057		0.763	0.991	0.995		0.775	0.867	0.843				0.982	1.069	1.22	1.022	0.948
									0.982	1.069	1.22	1.022	0.962	0.971	1.008	1.042	0.906	0.954	0.993	1.005	0.897	0.956	0.937				0.982	1.069	1.22	1.022	0.948	1.023	1.058		0.762	0.99	0.994		0.776	0.868	0.844				0.982	1.069	1.22	1.022	0.949
									0.984	1.07	1.225	1.022	0.961	0.97	1.009	1.044	0.905	0.955	0.994	1.005	0.896	0.958	0.937				0.984	1.07	1.225	1.022	0.948	1.025	1.058		0.763	0.989	0.993		0.777	0.869	0.844				0.984	1.07	1.225	1.022	0.949
								12	0.985	1.068	1.225	1.023	0.961	0.967	1.009	1.045	0.906	0.953	0.993	1.005	0.894	0.957	0.936			12	0.985	1.068	1.225	1.023	0.945	1.022	1.058		0.762	0.99	0.993		0.778	0.868	0.845			12	0.985	1.068	1.225	1.023	0.948
[truncated: 39 more columns]

## Sheet: Figure 7
							Figure 7a	Mechanically lysed bacteria
								Normalized Resistance (900 Hz)
								Time (h)	PAO1 liquid culture, filtered												After ultrasonication, non-filtered												After ultrasonication, filtered												Untreated Control
								0	1	1	1	1	1	1	1	1	1	1	1	1	1	1	1	1	1	1	1	1	1	1	1	1	1	1	1	1	1	1	1	1	1	1	1	1	1	1	1	1	1
									0.999	1.001	1.001	1.003	1.002	1.001	1.002	1.001	1.001	1.006	1.007	1.008	1.004	1	1	0.996	1.001	1.002	1.002	1	1.003	1.006	0.998	0.999	0.999	1	1	1.002	0.995	0.998	0.996	0.999	1.005	1.002	1.002	1.001	0.998	1.002	1.001	0.997	1.003
									0.998	0.982	0.982	0.979	0.999	0.999	1.001	1.002	1.006	1.01	1.013	1.01	0.984	0.981	0.982	1.004	1.002	1.001	1.003	1	1.005	1.012	0.999	0.999	0.99	0.982	0.994	0.989	0.99	0.999	0.993	0.999	1.01	1.006	1.006	1.003	1.009	0.982	1.002	0.997	1.008
									0.978	0.989	0.99	0.984	0.996	1	1.001	1.003	1.01	1.013	1.016	1.012	0.979	0.977	0.969	0.966	1.001	1.001	1.005	0.999	1.011	1.012	0.999	0.997	0.959	0.975	0.957	0.964	0.987	1	0.993	0.999	1.012	1.008	1.007	1.004	1.001	0.976	1.002	0.996	1.01
									0.961	0.979	0.988	0.977	0.998	1.001	0.997	0.999	1.005	1.003	1.006	1.001	0.967	0.964	0.96	0.987	1	0.997	0.999	1	0.999	1.005	1.007	0.999	0.972	0.976	0.971	0.966	0.996	1.001	0.993	0.994	1.004	1	1	0.991	0.981	1.006	0.997	0.997	1.009
									0.948	0.971	0.985	0.971	1.004	0.992	0.992	0.988	0.986	0.987	0.988	0.984	0.975	0.975	0.969	0.986	0.986	0.987	0.989	0.999	0.98	0.986	1.009	1	0.984	0.986	0.986	0.98	1.007	0.998	0.989	0.988	0.994	0.989	0.99	0.982	0.978	0.999	0.99	1.002	0.983
									0.94	0.956	0.976	0.964	0.92	0.989	0.99	0.984	0.999	1.006	1.009	1.011	0.983	0.985	0.979	0.983	1.026	1.018	1.009	0.969	1.01	1.003	0.944	0.97	0.999	0.996	0.994	0.989	1.005	0.994	0.983	0.981	0.99	0.982	0.986	0.977	0.981	0.994	0.983	1.005	0.972
									0.939	0.948	0.968	0.956	0.922	0.972	0.974	0.973	0.987	0.998	1	0.994	0.988	0.996	0.989	0.987	0.98	0.973	0.974	0.978	0.992	0.997	0.984	0.944	1.005	1.003	0.998	0.995	0.92	0.975	0.966	0.978	1.009	0.992	0.996	1.007	0.979	0.991	0.982	1.002	0.977
									0.941	0.944	0.962	0.95	0.92	0.959	0.964	0.969	0.965	0.978	0.98	0.982	0.998	1.005	1.002	0.992	0.975	0.97	0.971	0.982	0.988	0.989	0.999	0.945	1.014	1.01	1.003	1.002	0.949	0.987	0.973	0.976	1.012	0.993	0.997	0.997	0.977	0.991	0.991	1.006	0.99
									0.945	0.944	0.961	0.951	0.917	0.947	0.957	0.967	0.948	0.965	0.965	0.99	1.01	1.016	1.014	0.996	0.981	0.976	0.975	0.985	0.997	0.992	1.002	0.945	1.019	1.018	1.003	1.005	0.967	1	0.983	0.987	1.013	1.001	1	1.001	0.975	0.986	0.992	1.007	1
									0.949	0.943	0.96	0.954	0.918	0.938	0.948	0.96	0.936	0.953	0.951	0.997	1.023	1.029	1.025	1	0.986	0.981	0.981	0.988	1.002	0.999	1.003	0.945	1.026	1.022	1.008	1.008	0.98	1.01	0.995	0.997	1.018	1.01	1.006	1.01	0.973	0.985	0.992	1.005	1.007
									0.954	0.948	0.961	0.954	0.919	0.93	0.943	0.954	0.929	0.945	0.942	0.999	1.031	1.035	1.034	1	0.989	0.988	0.982	0.99	1.007	1.003	1.007	0.946	1.027	1.026	1.012	1.01	0.988	1.02	1.003	1.003	1.02	1.015	1.012	1.014	0.969	0.984	0.992	1.003	1.005
									0.961	0.953	0.965	0.958	0.92	0.928	0.94	0.95	0.925	0.941	0.938	0.996	1.04	1.043	1.046	0.999	0.994	0.992	0.987	0.994	1.008	1.005	1.01	0.946	1.034	1.032	1.012	1.017	0.992	1.027	1.008	1.009	1.021	1.012	1.008	1.015	0.966	0.988	0.987	1.002	1
									0.966	0.956	0.97	0.962	0.92	0.928	0.939	0.948	0.924	0.941	0.937	0.993	1.047	1.051	1.055	0.998	0.995	0.995	0.99	0.995	1.001	1.001	1.012	0.947	1.037	1.039	1.014	1.02	0.993	1.033	1.011	1.01	1.018	1.008	1.005	1.012	0.964	0.995	0.982	1	0.992
									0.972	0.963	0.975	0.963	0.92	0.929	0.939	0.947	0.925	0.942	0.938	0.989	1.058	1.059	1.061	0.998	0.996	0.992	0.988	0.994	1.001	0.997	1.013	0.949	1.041	1.047	1.015	1.026	0.994	1.033	1.011	1.008	1.017	1.005	1.005	1.008	0.958	0.999	0.978	0.998	0.984
									0.975	0.968	0.981	0.973	0.92	0.93	0.938	0.949	0.928	0.945	0.939	0.99	1.064	1.067	1.066	0.999	0.994	0.99	0.988	0.994	0.998	0.997	1.013	0.951	1.045	1.05	1.018	1.03	0.995	1.034	1.011	1.007	1.016	1.006	1.006	1.006	0.955	1.002	0.977	0.998	0.979
									0.979	0.975	0.986	0.975	0.919	0.932	0.94	0.95	0.932	0.949	0.942	0.994	1.072	1.072	1.071	0.996	0.993	0.988	0.988	0.996	1.002	0.999	1.011	0.955	1.048	1.054	1.022	1.033	0.997	1.034	1.011	1.007	1.018	1.007	1.009	1.008	0.948	1.006	0.977	0.997	0.978
									0.983	0.979	0.994	0.981	0.919	0.936	0.942	0.952	0.938	0.955	0.948	0.998	1.078	1.078	1.077	0.995	0.994	0.99	0.989	0.996	1.008	1.006	1.011	0.957	1.049	1.057	1.023	1.036	0.999	1.034	1.011	1.008	1.023	1.007	1.011	1.007	0.941	1.01	0.978	0.998	0.978
									0.984	0.982	0.995	0.987	0.92	0.939	0.944	0.955	0.945	0.957	0.951	1.007	1.086	1.086	1.083	0.991	1	0.992	0.993	0.997	1.016	1.011	1.011	0.959	1.052	1.061	1.024	1.038	0.998	1.036	1.01	1.01	1.029	1.013	1.015	1.011	0.942	1.014	0.98	0.998	0.984
									0.987	0.989	1.001	0.99	0.921	0.942	0.947	0.958	0.949	0.967	0.958	1.016	1.09	1.09	1.087	0.992	1.003	0.999	1.001	0.998	1.027	1.021	1.013	0.96	1.054	1.064	1.025	1.039	0.995	1.038	1.012	1.012	1.034	1.017	1.021	1.016	0.943	1.015	0.982	1.001	0.99
									0.99	0.994	1.006	0.995	0.921	0.947	0.949	0.961	0.957	0.973	0.966	1.028	1.095	1.098	1.093	0.99	1.008	1.002	1.006	1	1.038	1.03	1.014	0.962	1.058	1.066	1.028	1.046	0.993	1.039	1.014	1.015	1.04	1.021	1.022	1.021	0.945	1.016	0.986	1.001	0.995
									0.991	0.997	1.009	0.997	0.921	0.949	0.952	0.965	0.963	0.98	0.974	1.041	1.102	1.104	1.098	0.985	1.016	1.009	1.014	1.005	1.052	1.039	1.015	0.964	1.059	1.067	1.026	1.048	0.991	1.041	1.017	1.019	1.045	1.028	1.032	1.026	0.946	1.019	0.988	1.002	1.001
									0.991	1.001	1.011	0.999	0.921	0.951	0.958	0.969	0.971	0.986	0.982	1.053	1.109	1.112	1.104	0.981	1.024	1.017	1.02	1.008	1.062	1.045	1.012	0.963	1.061	1.072	1.03	1.049	0.991	1.044	1.019	1.022	1.048	1.033	1.037	1.029	0.948	1.021	0.99	1	1.008
									0.994	1.004	1.018	1.004	0.921	0.957	0.961	0.971	0.979	0.995	0.988	1.068	1.118	1.116	1.11	0.975	1.03	1.026	1.027	1.011	1.074	1.056	1.011	0.962	1.061	1.076	1.031	1.049	0.989	1.046	1.021	1.027	1.051	1.039	1.04	1.035	0.948	1.023	0.992	1.001	1.014
									0.995	1.01	1.022	1.008	0.921	0.962	0.966	0.977	0.985	1.003	0.993	1.077	1.122	1.124	1.112	0.97	1.041	1.035	1.035	1.013	1.083	1.063	1.01	0.964	1.062	1.08	1.033	1.054	0.986	1.049	1.021	1.032	1.057	1.044	1.047	1.038	0.947	1.027	0.998	1	1.02
									0.998	1.012	1.023	1.012	0.919	0.965	0.969	0.98	0.99	1.01	1.001	1.087	1.128	1.129	1.117	0.966	1.048	1.044	1.04	1.016	1.093	1.073	1.002	0.963	1.064	1.083	1.035	1.057	0.984	1.051	1.024	1.034	1.058	1.046	1.055	1.039	0.948	1.03	0.999	1	1.026
									1.001	1.017	1.029	1.015	0.918	0.97	0.972	0.984	0.998	1.015	1.009	1.099	1.132	1.131	1.122	0.966	1.056	1.053	1.046	1.02	1.104	1.079	0.998	0.964	1.065	1.086	1.035	1.061	0.984	1.052	1.028	1.039	1.061	1.052	1.057	1.044	0.943	1.03	1.005	1.001	1.032
									1.002	1.021	1.034	1.018	0.917	0.972	0.976	0.989	1.005	1.021	1.016	1.108	1.138	1.135	1.126	0.961	1.064	1.056	1.053	1.022	1.111	1.086	0.994	0.961	1.068	1.09	1.039	1.066	0.981	1.054	1.031	1.042	1.063	1.054	1.06	1.049	0.942	1.031	1.006	1.003	1.037
									1.002	1.025	1.038	1.022	0.915	0.974	0.98	0.992	1.011	1.024	1.024	1.116	1.142	1.141	1.129	0.96	1.073	1.063	1.057	1.024	1.119	1.091	0.988	0.961	1.069	1.09	1.044	1.07	0.98	1.058	1.034	1.043	1.065	1.056	1.063	1.051	0.938	1.033	1.007	1.002	1.04
									1.009	1.031	1.045	1.037	0.915	0.977	0.984	0.997	1.015	1.031	1.029	1.126	1.162	1.159	1.14	0.961	1.082	1.073	1.064	1.027	1.13	1.097	0.984	0.957	1.072	1.095	1.048	1.073	0.979	1.059	1.039	1.048	1.067	1.055	1.067	1.053	0.934	1.035	1.006	1.004	1.045
								1	1.013	1.036	1.047	1.04	0.914	0.979	0.987	1	1.019	1.037	1.035	1.13	1.154	1.152	1.133	0.957	1.089	1.077	1.069	1.028	1.137	1.1	0.98	0.952	1.075	1.107	1.05	1.08	0.976	1.059	1.041	1.049	1.068	1.06	1.07	1.056	0.937	1.041	1.007	1.005	1.046
									1.004	1.033	1.048	1.033	0.913	0.983	0.989	1.003	1.026	1.041	1.038	1.137	1.157	1.148	1.13	0.943	1.098	1.081	1.076	1.03	1.147	1.104	0.976	0.949	1.069	1.103	1.054	1.08	0.975	1.06	1.042	1.05	1.066	1.06	1.072	1.056	0.929	1.04	1.009	1.004	1.05
									1.005	1.038	1.055	1.037	0.911	0.986	0.992	1.005	1.032	1.045	1.045	1.143	1.16	1.15	1.131	0.94	1.101	1.087	1.083	1.03	1.153	1.108	0.969	0.946	1.07	1.104	1.051	1.088	0.974	1.062	1.044	1.054	1.065	1.063	1.074	1.061	0.933	1.045	1.012	1.002	1.052
									1.005	1.041	1.064	1.039	0.911	0.987	0.993	1.01	1.035	1.053	1.051	1.149	1.162	1.152	1.131	0.933	1.108	1.092	1.086	1.031	1.159	1.11	0.964	0.941	1.074	1.116	1.059	1.084	0.97	1.064	1.045	1.057	1.065	1.064	1.075	1.063	0.928	1.046	1.012	1.002	1.057
									1.004	1.045	1.061	1.042	0.91	0.988	0.996	1.012	1.038	1.057	1.058	1.152	1.164	1.154	1.128	0.931	1.114	1.098	1.09	1.031	1.164	1.11	0.955	0.935	1.063	1.102	1.053	1.079	0.966	1.065	1.048	1.059	1.063	1.065	1.075	1.065	0.925	1.042	1.01	1.001	1.059
									1.001	1.046	1.064	1.045	0.909	0.991	1	1.013	1.042	1.06	1.064	1.155	1.168	1.154	1.127	0.923	1.119	1.101	1.093	1.031	1.169	1.112	0.948	0.933	1.059	1.102	1.053	1.081	0.962	1.065	1.047	1.061	1.062	1.064	1.074	1.068	0.92	1.043	1.01	1.001	1.059
									0.998	1.051	1.067	1.049	0.909	0.993	1.006	1.019	1.045	1.065	1.068	1.159	1.169	1.15	1.122	0.919	1.126	1.107	1.099	1.031	1.172	1.112	0.94	0.928	1.058	1.1	1.054	1.082	0.958	1.067	1.049	1.062	1.058	1.063	1.073	1.07	0.915	1.043	1.013	1.001	1.061
									0.997	1.055	1.071	1.051	0.907	0.996	1.008	1.019	1.049	1.071	1.071	1.16	1.168	1.147	1.121	0.919	1.132	1.112	1.105	1.031	1.176	1.112	0.933	0.928	1.054	1.098	1.056	1.084	0.954	1.068	1.054	1.065	1.053	1.062	1.071	1.072	0.913	1.044	1.016	1.001	1.063
									0.996	1.056	1.074	1.056	0.906	0.998	1.009	1.024	1.051	1.072	1.077	1.162	1.168	1.145	1.116	0.915	1.134	1.116	1.109	1.029	1.178	1.111	0.924	0.924	1.051	1.098	1.057	1.082	0.952	1.067	1.056	1.068	1.05	1.061	1.069	1.074	0.911	1.046	1.019	1	1.066
									0.993	1.062	1.086	1.066	0.904	1	1.011	1.027	1.058	1.075	1.083	1.163	1.165	1.147	1.114	0.908	1.138	1.119	1.112	1.029	1.179	1.111	0.918	0.921	1.047	1.095	1.057	1.083	0.946	1.068	1.057	1.069	1.044	1.059	1.067	1.076	0.907	1.045	1.019	1.001	1.066
									0.991	1.063	1.083	1.065	0.904	1.002	1.014	1.03	1.06	1.08	1.084	1.164	1.163	1.144	1.112	0.905	1.143	1.125	1.115	1.029	1.18	1.108	0.913	0.916	1.046	1.095	1.06	1.083	0.942	1.068	1.059	1.071	1.042	1.055	1.063	1.077	0.914	1.053	1.021	1.001	1.067
									0.989	1.067	1.094	1.074	0.904	1.006	1.019	1.034	1.062	1.084	1.087	1.164	1.176	1.153	1.12	0.907	1.147	1.13	1.118	1.028	1.181	1.107	0.905	0.912	1.039	1.094	1.062	1.087	0.937	1.067	1.06	1.072	1.038	1.052	1.061	1.078	0.906	1.053	1.022	1.002	1.066
									0.985	1.069	1.094	1.069	0.903	1.007	1.022	1.035	1.064	1.087	1.092	1.162	1.162	1.141	1.102	0.895	1.15	1.134	1.121	1.025	1.181	1.103	0.899	0.907	1.035	1.093	1.06	1.087	0.933	1.067	1.059	1.075	1.034	1.049	1.059	1.079	0.91	1.048	1.023	1.001	1.066
									0.984	1.07	1.098	1.071	0.902	1.009	1.025	1.036	1.068	1.091	1.097	1.16	1.162	1.14	1.098	0.889	1.154	1.137	1.123	1.024	1.18	1.101	0.894	0.901	1.033	1.089	1.059	1.08	0.93	1.064	1.06	1.075	1.027	1.047	1.054	1.082	0.909	1.048	1.026	1.002	1.068
									0.985	1.074	1.098	1.07	0.902	1.011	1.027	1.04	1.07	1.096	1.1	1.16	1.162	1.136	1.091	0.884	1.156	1.141	1.125	1.023	1.179	1.098	0.887	0.896	1.03	1.083	1.059	1.079	0.925	1.065	1.059	1.077	1.022	1.045	1.051	1.084	0.905	1.052	1.026	1.001	1.067
									0.985	1.069	1.1	1.073	0.901	1.013	1.029	1.045	1.073	1.099	1.105	1.158	1.158	1.135	1.088	0.884	1.157	1.143	1.126	1.021	1.177	1.095	0.878	0.893	1.024	1.084	1.058	1.078	0.918	1.064	1.061	1.078	1.019	1.042	1.046	1.083	0.903	1.051	1.028	1	1.068
									0.979	1.069	1.098	1.074	0.9	1.015	1.032	1.049	1.074	1.105	1.109	1.155	1.156	1.13	1.086	0.876	1.157	1.146	1.128	1.019	1.175	1.092	0.875	0.888	1.023	1.081	1.057	1.079	0.917	1.063	1.062	1.077	1.016	1.041	1.043	1.082	0.901	1.053	1.027	1.002	1.068
									0.977	1.07	1.101	1.075	0.899	1.017	1.032	1.052	1.077	1.108	1.111	1.152	1.154	1.13	1.079	0.874	1.158	1.15	1.128	1.013	1.172	1.088	0.869	0.884	1.015	1.077	1.061	1.076	0.907	1.061	1.062	1.075	1.01	1.038	1.041	1.084	0.903	1.053	1.028	1.003	1.068
									0.975	1.07	1.104	1.078	0.897	1.02	1.034	1.055	1.079	1.111	1.114	1.151	1.155	1.128	1.075	0.87	1.159	1.151	1.129	1.014	1.168	1.085	0.864	0.881	1.011	1.071	1.061	1.077	0.904	1.059	1.061	1.076	1.007	1.037	1.039	1.086	0.898	1.054	1.027	1.004	1.068
									0.973	1.07	1.109	1.08	0.896	1.021	1.038	1.058	1.079	1.114	1.117	1.148	1.154	1.125	1.075	0.868	1.16	1.153	1.128	1.012	1.166	1.084	0.859	0.878	1.004	1.061	1.06	1.073	0.902	1.059	1.061	1.072	1.002	1.034	1.031	1.087	0.899	1.055	1.025	1.004	1.07
									0.97	1.069	1.107	1.08	0.895	1.022	1.04	1.059	1.081	1.117	1.119	1.146	1.151	1.122	1.067	0.861	1.162	1.154	1.13	1.009	1.164	1.082	0.854	0.873	1.003	1.055	1.058	1.072	0.899	1.055	1.06	1.071	1.001	1.031	1.029	1.087	0.898	1.057	1.026	1.004	1.073
									0.967	1.067	1.106	1.079	0.893	1.024	1.043	1.061	1.084	1.119	1.124	1.145	1.15	1.119	1.063	0.858	1.162	1.155	1.129	1.008	1.161	1.077	0.848	0.871	1.001	1.052	1.057	1.07	0.895	1.054	1.059	1.072	0.998	1.03	1.029	1.088	0.894	1.055	1.026	1.005	1.072
									0.963	1.065	1.105	1.076	0.891	1.025	1.042	1.065	1.085	1.121	1.126	1.143	1.145	1.117	1.058	0.856	1.164	1.156	1.129	1.004	1.158	1.075	0.842	0.867	0.997	1.05	1.058	1.066	0.887	1.051	1.06	1.071	0.995	1.027	1.028	1.089	0.892	1.053	1.026	1.006	1.071
									0.963	1.065	1.105	1.076	0.889	1.027	1.044	1.067	1.086	1.127	1.128	1.141	1.141	1.112	1.057	0.852	1.164	1.157	1.128	1.002	1.156	1.072	0.838	0.864	0.995	1.047	1.056	1.059	0.888	1.047	1.059	1.071	0.992	1.026	1.027	1.09	0.889	1.053	1.026	1.005	1.07
									0.961	1.074	1.116	1.081	0.886	1.027	1.046	1.069	1.086	1.129	1.129	1.139	1.141	1.111	1.06	0.853	1.164	1.158	1.128	1	1.152	1.069	0.836	0.861	0.996	1.049	1.064	1.06	0.883	1.046	1.06	1.072	0.989	1.026	1.025	1.09	0.894	1.055	1.028	1.004	1.069
									0.963	1.066	1.111	1.073	0.886	1.027	1.048	1.072	1.087	1.13	1.13	1.135	1.145	1.111	1.058	0.849	1.164	1.159	1.126	0.998	1.15	1.068	0.832	0.857	0.985	1.041	1.052	1.052	0.878	1.043	1.059	1.071	0.987	1.025	1.022	1.09	0.886	1.048	1.029	1.004	1.067
									0.947	1.062	1.108	1.072	0.884	1.028	1.048	1.075	1.088	1.132	1.132	1.135	1.138	1.103	1.053	0.845	1.164	1.159	1.127	0.995	1.149	1.065	0.831	0.855	0.982	1.037	1.052	1.048	0.873	1.038	1.056	1.071	0.985	1.024	1.021	1.09	0.882	1.049	1.029	1.004	1.066
									0.958	1.069	1.114	1.078	0.881	1.029	1.05	1.076	1.088	1.135	1.133	1.132	1.145	1.101	1.056	0.847	1.163	1.157	1.125	0.993	1.147	1.064	0.826	0.853	0.981	1.04	1.05	1.052	0.869	1.033	1.054	1.069	0.98	1.022	1.019	1.089	0.891	1.054	1.027	1.002	1.067
									0.945	1.061	1.113	1.072	0.88	1.03	1.049	1.079	1.088	1.138	1.134	1.131	1.135	1.102	1.055	0.853	1.164	1.16	1.125	0.991	1.148	1.064	0.823	0.851	0.982	1.042	1.054	1.048	0.864	1.032	1.051	1.068	0.981	1.022	1.019	1.087	0.882	1.055	1.029	1.002	1.066
									0.943	1.06	1.106	1.065	0.875	1.029	1.05	1.081	1.087	1.139	1.136	1.128	1.13	1.097	1.045	0.842	1.162	1.159	1.123	0.988	1.147	1.062	0.822	0.849	0.978	1.036	1.049	1.039	0.864	1.03	1.048	1.067	0.981	1.021	1.02	1.087	0.883	1.048	1.03	1.003	1.066
								2	0.944	1.066	1.11	1.07	0.874	1.029	1.051	1.081	1.088	1.14	1.139	1.126	1.136	1.096	1.055	0.847	1.164	1.16	1.121	0.988	1.146	1.061	0.821	0.847	0.98	1.036	1.05	1.048	0.861	1.027	1.048	1.064	0.983	1.022	1.016	1.085	0.883	1.053	1.032	1.003	1.064
									0.936	1.062	1.105	1.067	0.871	1.029	1.052	1.084	1.088	1.14	1.141	1.125	1.124	1.094	1.043	0.843	1.162	1.16	1.12	0.988	1.147	1.061	0.82	0.846	0.973	1.033	1.047	1.045	0.859	1.026	1.048	1.062	0.979	1.02	1.015	1.084	0.882	1.05	1.032	1.003	1.064
									0.939	1.066	1.111	1.071	0.866	1.028	1.053	1.084	1.089	1.142	1.142	1.125	1.138	1.102	1.048	0.854	1.16	1.159	1.116	0.985	1.145	1.058	0.819	0.843	0.975	1.04	1.052	1.043	0.856	1.023	1.047	1.061	0.979	1.02	1.018	1.083	0.88	1.05	1.034	1.003	1.063
									0.925	1.059	1.1	1.066	0.863	1.028	1.053	1.085	1.09	1.143	1.142	1.123	1.126	1.092	1.036	0.841	1.155	1.157	1.116	0.983	1.145	1.058	0.817	0.839	0.971	1.035	1.044	1.038	0.854	1.02	1.048	1.063	0.98	1.02	1.019	1.083	0.877	1.051	1.033	1.004	1.063
									0.932	1.069	1.109	1.074	0.862	1.029	1.055	1.086	1.09	1.142	1.144	1.122	1.137	1.101	1.035	0.848	1.154	1.155	1.116	0.98	1.144	1.058	0.817	0.838	0.986	1.033	1.047	1.046	0.85	1.021	1.046	1.062	0.979	1.02	1.018	1.082	0.887	1.059	1.032	1.002	1.062
									0.926	1.067	1.109	1.061	0.859	1.029	1.054	1.089	1.089	1.141	1.143	1.121	1.134	1.106	1.048	0.849	1.153	1.155	1.114	0.978	1.144	1.058	0.82	0.834	0.974	1.039	1.044	1.037	0.848	1.024	1.045	1.061	0.982	1.02	1.018	1.081	0.886	1.063	1.031	1.001	1.065
									0.922	1.052	1.099	1.062	0.857	1.029	1.054	1.09	1.09	1.139	1.144	1.12	1.125	1.096	1.035	0.845	1.153	1.156	1.113	0.977	1.14	1.059	0.82	0.834	0.977	1.034	1.038	1.037	0.847	1.019	1.046	1.059	0.982	1.02	1.019	1.081	0.878	1.05	1.03	1.002	1.062
									0.922	1.05	1.099	1.06	0.855	1.03	1.055	1.092	1.09	1.136	1.143	1.12	1.127	1.094	1.036	0.842	1.153	1.156	1.112	0.975	1.14	1.058	0.819	0.833	0.977	1.03	1.035	1.039	0.845	1.02	1.046	1.058	0.982	1.022	1.018	1.08	0.887	1.051	1.031	1.002	1.062
									0.918	1.049	1.098	1.059	0.853	1.028	1.056	1.093	1.089	1.135	1.143	1.119	1.129	1.093	1.036	0.847	1.153	1.158	1.109	0.973	1.141	1.058	0.818	0.831	0.977	1.033	1.037	1.036	0.843	1.019	1.045	1.058	0.985	1.021	1.016	1.078	0.881	1.049	1.032	1.001	1.065
									0.92	1.049	1.096	1.064	0.851	1.027	1.056	1.092	1.09	1.135	1.145	1.12	1.129	1.092	1.035	0.847	1.154	1.157	1.11	0.972	1.141	1.06	0.82	0.831	0.976	1.031	1.031	1.035	0.841	1.018	1.043	1.06	0.986	1.022	1.016	1.078	0.88	1.048	1.033	1.001	1.065
									0.913	1.047	1.095	1.058	0.849	1.025	1.057	1.095	1.088	1.135	1.145	1.119	1.127	1.093	1.035	0.846	1.151	1.158	1.111	0.971	1.141	1.061	0.82	0.833	0.977	1.031	1.031	1.035	0.841	1.016	1.043	1.058	0.989	1.022	1.014	1.077	0.877	1.05	1.03	1	1.065
									0.91	1.046	1.093	1.058	0.846	1.024	1.057	1.095	1.089	1.136	1.145	1.117	1.13	1.094	1.038	0.848	1.151	1.158	1.11	0.971	1.142	1.059	0.823	0.835	0.973	1.032	1.032	1.038	0.84	1.012	1.041	1.056	0.992	1.023	1.016	1.077	0.874	1.05	1.03	0.999	1.062
									0.908	1.046	1.093	1.056	0.842	1.023	1.057	1.098	1.089	1.136	1.146	1.118	1.129	1.095	1.042	0.848	1.147	1.156	1.108	0.969	1.14	1.058	0.822	0.836	0.977	1.03	1.033	1.04	0.84	1.011	1.04	1.057	0.996	1.024	1.018	1.077	0.873	1.049	1.032	1	1.065
									0.907	1.045	1.092	1.057	0.841	1.023	1.056	1.097	1.089	1.136	1.146	1.117	1.128	1.095	1.041	0.851	1.147	1.156	1.106	0.967	1.139	1.058	0.826	0.835	0.978	1.028	1.035	1.042	0.837	1.012	1.04	1.056	0.999	1.025	1.021	1.076	0.875	1.05	1.032	0.998	1.065
									0.907	1.043	1.09	1.057	0.84	1.022	1.056	1.097	1.089	1.137	1.144	1.116	1.126	1.095	1.042	0.854	1.145	1.158	1.102	0.967	1.138	1.059	0.83	0.836	0.98	1.028	1.032	1.043	0.838	1.012	1.038	1.056	1.002	1.024	1.022	1.076	0.874	1.049	1.031	0.999	1.063
									0.906	1.044	1.09	1.057	0.837	1.02	1.054	1.099	1.086	1.136	1.142	1.115	1.126	1.097	1.04	0.855	1.145	1.156	1.104	0.967	1.139	1.06	0.832	0.836	0.985	1.03	1.037	1.043	0.838	1.01	1.036	1.056	1.006	1.025	1.023	1.076	0.874	1.049	1.031	1	1.064
									0.906	1.042	1.087	1.055	0.835	1.018	1.054	1.099	1.085	1.134	1.142	1.116	1.125	1.093	1.042	0.855	1.145	1.155	1.102	0.964	1.139	1.063	0.833	0.835	0.985	1.03	1.037	1.044	0.839	1.01	1.036	1.055	1.008	1.028	1.024	1.076	0.875	1.05	1.03	1	1.066
									0.906	1.04	1.084	1.053	0.832	1.017	1.053	1.098	1.082	1.134	1.142	1.116	1.12	1.092	1.043	0.857	1.143	1.155	1.103	0.966	1.139	1.065	0.834	0.834	0.989	1.033	1.036	1.047	0.839	1.009	1.035	1.055	1.011	1.028	1.026	1.076	0.876	1.051	1.03	0.999	1.065
									0.905	1.039	1.083	1.051	0.829	1.017	1.053	1.1	1.081	1.135	1.141	1.116	1.123	1.095	1.045	0.858	1.142	1.152	1.102	0.967	1.137	1.064	0.836	0.835	0.99	1.036	1.037	1.046	0.839	1.008	1.035	1.056	1.013	1.025	1.025	1.074	0.878	1.05	1.031	0.999	1.064
									0.904	1.038	1.082	1.049	0.826	1.016	1.053	1.098	1.079	1.136	1.141	1.116	1.123	1.095	1.043	0.857	1.141	1.15	1.099	0.965	1.134	1.063	0.839	0.836	0.995	1.041	1.037	1.047	0.836	1.007	1.034	1.055	1.015	1.026	1.029	1.073	0.876	1.051	1.032	1	1.065
									0.901	1.041	1.078	1.047	0.824	1.016	1.054	1.095	1.077	1.135	1.139	1.117	1.123	1.096	1.041	0.863	1.144	1.151	1.099	0.966	1.132	1.063	0.842	0.833	0.995	1.041	1.037	1.048	0.838	1.008	1.035	1.056	1.017	1.029	1.025	1.073	0.875	1.051	1.033	1.001	1.065
									0.901	1.037	1.081	1.048	0.819	1.016	1.053	1.095	1.074	1.135	1.139	1.115	1.126	1.097	1.042	0.859	1.142	1.149	1.097	0.967	1.131	1.062	0.845	0.834	1.002	1.044	1.038	1.047	0.837	1.006	1.035	1.055	1.018	1.03	1.029	1.073	0.888	1.049	1.033	0.999	1.066
									0.901	1.036	1.075	1.045	0.816	1.014	1.052	1.096	1.071	1.135	1.138	1.114	1.133	1.108	1.048	0.859	1.143	1.149	1.096	0.965	1.129	1.061	0.846	0.834	0.996	1.041	1.035	1.047	0.834	1.008	1.034	1.053	1.019	1.031	1.03	1.072	0.881	1.052	1.031	0.999	1.064
									0.897	1.036	1.074	1.039	0.813	1.015	1.052	1.096	1.071	1.137	1.138	1.113	1.128	1.097	1.044	0.86	1.14	1.149	1.097	0.965	1.128	1.062	0.849	0.835	0.992	1.039	1.038	1.048	0.835	1.007	1.034	1.055	1.021	1.031	1.029	1.072	0.878	1.047	1.032	0.998	1.063
									0.898	1.035	1.072	1.038	0.811	1.013	1.051	1.096	1.07	1.136	1.136	1.111	1.126	1.097	1.045	0.858	1.141	1.149	1.095	0.964	1.127	1.061	0.85	0.837	0.995	1.041	1.037	1.045	0.836	1.008	1.035	1.055	1.021	1.033	1.029	1.069	0.879	1.046	1.03	0.997	1.064
									0.901	1.026	1.077	1.037	0.808	1.013	1.051	1.096	1.069	1.138	1.135	1.108	1.13	1.101	1.05	0.86	1.139	1.146	1.094	0.965	1.125	1.061	0.855	0.838	0.994	1.042	1.039	1.045	0.836	1.009	1.036	1.053	1.022	1.032	1.03	1.069	0.881	1.049	1.029	0.995	1.063
									0.897	1.033	1.073	1.037	0.805	1.01	1.051	1.096	1.068	1.138	1.136	1.107	1.126	1.096	1.045	0.861	1.139	1.144	1.093	0.966	1.123	1.061	0.859	0.839	0.997	1.048	1.041	1.046	0.837	1.009	1.036	1.054	1.023	1.031	1.031	1.068	0.88	1.051	1.03	0.995	1.062
									0.893	1.03	1.07	1.042	0.802	1.009	1.051	1.095	1.068	1.136	1.135	1.105	1.128	1.093	1.046	0.864	1.139	1.145	1.093	0.967	1.119	1.062	0.861	0.842	0.995	1.044	1.04	1.046	0.836	1.008	1.038	1.053	1.022	1.032	1.03	1.066	0.88	1.048	1.031	0.994	1.062
									0.892	1.028	1.068	1.038	0.801	1.009	1.05	1.095	1.069	1.135	1.135	1.103	1.124	1.092	1.05	0.865	1.139	1.144	1.091	0.964	1.117	1.062	0.866	0.844	0.999	1.049	1.041	1.048	0.837	1.01	1.038	1.053	1.022	1.031	1.03	1.065	0.885	1.047	1.031	0.994	1.061
									0.892	1.029	1.072	1.04	0.797	1.007	1.049	1.095	1.07	1.134	1.134	1.1	1.125	1.093	1.05	0.869	1.137	1.143	1.092	0.965	1.115	1.062	0.868	0.844	1.002	1.047	1.044	1.051	0.841	1.011	1.038	1.051	1.023	1.032	1.028	1.063	0.887	1.049	1.033	0.994	1.059
								3	0.89	1.029	1.067	1.037	0.793	1.007	1.046	1.093	1.071	1.133	1.133	1.098	1.122	1.09	1.052	0.872	1.135	1.141	1.093	0.964	1.112	1.06	0.87	0.847	1.001	1.046	1.039	1.05	0.841	1.01	1.039	1.049	1.024	1.032	1.028	1.062	0.881	1.048	1.033	0.994	1.059
									0.891	1.029	1.067	1.035	0.79	1.004	1.045	1.095	1.071	1.133	1.133	1.096	1.122	1.089	1.049	0.869	1.135	1.14	1.091	0.962	1.109	1.059	0.871	0.847	1.005	1.047	1.036	1.05	0.844	1.012	1.038	1.049	1.025	1.033	1.027	1.06	0.882	1.052	1.033	0.995	1.06
									0.892	1.031	1.068	1.035	0.789	1.003	1.044	1.094	1.071	1.134	1.131	1.094	1.12	1.086	1.048	0.873	1.132	1.138	1.092	0.963	1.107	1.058	0.873	0.849	1.003	1.042	1.038	1.05	0.844	1.014	1.037	1.051	1.025	1.032	1.027	1.059	0.883	1.048	1.033	0.995	1.059
									0.891	1.031	1.066	1.032	0.787	1	1.044	1.094	1.071	1.133	1.13	1.092	1.12	1.085	1.048	0.873	1.131	1.137	1.092	0.962	1.105	1.056	0.874	0.85	1	1.043	1.039	1.051	0.845	1.014	1.038	1.051	1.025	1.03	1.026	1.058	0.883	1.049	1.032	0.994	1.061
									0.89	1.033	1.067	1.03	0.783	1.001	1.043	1.093	1.072	1.131	1.127	1.089	1.117	1.083	1.047	0.877	1.129	1.137	1.092	0.964	1.1	1.055	0.874	0.85	1.003	1.043	1.039	1.053	0.848	1.013	1.038	1.051	1.027	1.03	1.026	1.056	0.882	1.05	1.031	0.992	1.06
									0.887	1.032	1.066	1.029	0.78	0.998	1.041	1.093	1.073	1.129	1.126	1.085	1.116	1.081	1.046	0.877	1.128	1.136	1.09	0.962	1.095	1.053	0.875	0.85	1.001	1.043	1.038	1.052	0.85	1.014	1.038	1.05	1.025	1.03	1.025	1.055	0.883	1.047	1.031	0.99	1.059
									0.886	1.031	1.067	1.028	0.778	1	1.04	1.095	1.072	1.129	1.127	1.084	1.113	1.081	1.045	0.877	1.126	1.135	1.093	0.965	1.092	1.051	0.877	0.85	0.999	1.04	1.04	1.052	0.85	1.018	1.038	1.048	1.024	1.028	1.028	1.054	0.883	1.047	1.03	0.99	1.057
									0.887	1.034	1.065	1.032	0.776	0.998	1.039	1.094	1.073	1.127	1.126	1.079	1.118	1.085	1.044	0.882	1.125	1.134	1.093	0.962	1.087	1.049	0.88	0.849	0.999	1.04	1.038	1.053	0.852	1.019	1.04	1.048	1.023	1.028	1.026	1.052	0.882	1.046	1.029	0.989	1.058
									0.883	1.03	1.068	1.03	0.774	0.997	1.04	1.093	1.073	1.124	1.126	1.075	1.107	1.078	1.043	0.881	1.123	1.131	1.093	0.958	1.083	1.047	0.883	0.849	1.003	1.04	1.041	1.055	0.852	1.019	1.041	1.049	1.021	1.028	1.025	1.048	0.883	1.048	1.028	0.99	1.059
									0.882	1.03	1.06	1.029	0.772	0.994	1.038	1.093	1.073	1.126	1.126	1.073	1.114	1.077	1.042	0.879	1.119	1.131	1.093	0.957	1.081	1.045	0.887	0.849	1.002	1.044	1.042	1.053	0.852	1.02	1.039	1.048	1.021	1.028	1.024	1.044	0.886	1.05	1.026	0.99	1.058
									0.881	1.029	1.058	1.029	0.769	0.993	1.039	1.093	1.074	1.125	1.124	1.07	1.114	1.076	1.043	0.879	1.118	1.127	1.09	0.954	1.076	1.044	0.887	0.848	1.002	1.04	1.037	1.053	0.853	1.02	1.038	1.048	1.02	1.026	1.023	1.044	0.888	1.049	1.027	0.992	1.06
									0.88	1.028	1.056	1.029	0.766	0.991	1.038	1.092	1.074	1.124	1.125	1.066	1.113	1.075	1.041	0.882	1.118	1.127	1.089	0.954	1.07	1.042	0.888	0.848	1.003	1.04	1.038	1.055	0.853	1.023	1.039	1.048	1.018	1.025	1.024	1.044	0.888	1.051	1.025	0.992	1.06
									0.878	1.026	1.056	1.032	0.763	0.992	1.038	1.093	1.073	1.125	1.125	1.062	1.114	1.075	1.037	0.882	1.116	1.124	1.088	0.951	1.068	1.041	0.889	0.85	1.004	1.041	1.037	1.054	0.855	1.021	1.038	1.048	1.017	1.023	1.021	1.045	0.888	1.05	1.026	0.993	1.059
									0.877	1.024	1.054	1.027	0.761	0.991	1.037	1.092	1.073	1.124	1.125	1.061	1.108	1.071	1.039	0.883	1.115	1.122	1.088	0.954	1.066	1.037	0.89	0.852	1.005	1.041	1.039	1.054	0.856	1.021	1.039	1.049	1.015	1.021	1.018	1.042	0.887	1.051	1.024	0.991	1.059
									0.875	1.02	1.054	1.026	0.759	0.988	1.036	1.092	1.071	1.124	1.124	1.055	1.107	1.069	1.041	0.882	1.113	1.12	1.086	0.956	1.062	1.034	0.891	0.853	1.006	1.041	1.036	1.053	0.856	1.022	1.042	1.047	1.013	1.019	1.014	1.041	0.884	1.051	1.024	0.987	1.06
									0.879	1.023	1.054	1.02	0.757	0.986	1.036	1.09	1.071	1.125	1.123	1.05	1.105	1.069	1.041	0.885	1.111	1.118	1.085	0.954	1.061	1.03	0.891	0.854	1.012	1.047	1.05	1.058	0.86	1.021	1.041	1.047	1.012	1.017	1.013	1.042	0.889	1.056	1.024	0.987	1.061
									0.876	1.018	1.05	1.022	0.754	0.986	1.035	1.091	1.071	1.124	1.122	1.048	1.103	1.065	1.039	0.883	1.111	1.117	1.086	0.953	1.059	1.029	0.893	0.856	1.009	1.041	1.041	1.059	0.86	1.022	1.04	1.047	1.01	1.016	1.01	1.041	0.887	1.051	1.024	0.987	1.06
									0.876	1.017	1.05	1.02	0.753	0.983	1.034	1.088	1.071	1.124	1.121	1.046	1.101	1.063	1.042	0.892	1.107	1.114	1.085	0.952	1.054	1.026	0.893	0.858	1.01	1.041	1.033	1.053	0.864	1.023	1.041	1.045	1.008	1.017	1.009	1.038	0.887	1.051	1.025	0.988	1.059
									0.874	1.016	1.051	1.022	0.751	0.982	1.033	1.085	1.071	1.125	1.122	1.042	1.098	1.06	1.035	0.886	1.106	1.112	1.085	0.953	1.049	1.023	0.893	0.858	1.011	1.042	1.035	1.052	0.864	1.025	1.04	1.044	1.007	1.018	1.007	1.035	0.891	1.051	1.024	0.988	1.059
									0.872	1.015	1.05	1.023	0.749	0.982	1.033	1.083	1.072	1.123	1.121	1.041	1.096	1.059	1.033	0.887	1.102	1.11	1.084	0.953	1.046	1.02	0.894	0.859	1.012	1.042	1.033	1.051	0.867	1.025	1.041	1.043	1.005	1.017	1.007	1.034	0.893	1.052	1.023	0.988	1.057
									0.878	1.024	1.054	1.025	0.749	0.981	1.032	1.083	1.072	1.122	1.12	1.038	1.099	1.068	1.046	0.898	1.102	1.108	1.083	0.951	1.043	1.017	0.894	0.859	1.021	1.049	1.031	1.054	0.868	1.026	1.041	1.045	1.003	1.016	1.004	1.033	0.897	1.051	1.024	0.99	1.058
									0.871	1.016	1.049	1.024	0.749	0.98	1.034	1.084	1.072	1.123	1.12	1.031	1.093	1.058	1.032	0.888	1.099	1.107	1.081	0.951	1.04	1.016	0.897	0.861	1.018	1.044	1.029	1.053	0.869	1.027	1.042	1.044	1	1.014	1.001	1.033	0.896	1.052	1.025	0.99	1.059
									0.871	1.014	1.044	1.022	0.747	0.979	1.035	1.082	1.07	1.122	1.118	1.028	1.091	1.055	1.028	0.889	1.096	1.106	1.081	0.951	1.036	1.011	0.9	0.861	1.018	1.043	1.026	1.051	0.873	1.028	1.041	1.044	0.999	1.012	1.001	1.032	0.894	1.054	1.026	0.989	1.058
									0.869	1.014	1.045	1.021	0.746	0.977	1.034	1.081	1.07	1.12	1.116	1.024	1.091	1.054	1.028	0.888	1.094	1.105	1.081	0.952	1.032	1.01	0.9	0.861	1.015	1.042	1.027	1.051	0.874	1.025	1.041	1.044	0.996	1.012	0.998	1.03	0.894	1.054	1.025	0.988	1.058
									0.871	1.014	1.046	1.02	0.745	0.98	1.035	1.081	1.069	1.122	1.114	1.02	1.087	1.054	1.027	0.89	1.092	1.103	1.081	0.952	1.031	1.007	0.899	0.862	1.014	1.04	1.025	1.052	0.875	1.027	1.04	1.044	0.996	1.008	0.997	1.03	0.896	1.053	1.025	0.99	1.058
									0.871	1.014	1.046	1.02	0.744	0.979	1.034	1.08	1.068	1.122	1.11	1.018	1.086	1.054	1.027	0.892	1.093	1.1	1.08	0.952	1.025	1.003	0.898	0.863	1.015	1.039	1.026	1.053	0.876	1.028	1.04	1.045	0.994	1.01	0.994	1.028	0.895	1.053	1.027	0.993	1.06
									0.872	1.012	1.046	1.018	0.742	0.979	1.033	1.08	1.067	1.123	1.106	1.017	1.086	1.055	1.026	0.892	1.089	1.1	1.078	0.954	1.021	1.002	0.896	0.863	1.015	1.041	1.023	1.051	0.877	1.031	1.039	1.043	0.992	1.008	0.993	1.026	0.895	1.052	1.026	0.995	1.062
									0.871	1.011	1.046	1.018	0.741	0.98	1.032	1.081	1.068	1.124	1.108	1.013	1.084	1.053	1.025	0.89	1.087	1.095	1.078	0.956	1.019	1	0.896	0.863	1.015	1.04	1.022	1.051	0.881	1.034	1.039	1.043	0.99	1.008	0.991	1.026	0.896	1.053	1.026	0.995	1.063
									0.868	1.008	1.047	1.019	0.74	0.979	1.031	1.081	1.068	1.127	1.108	1.009	1.081	1.051	1.025	0.892	1.085	1.094	1.078	0.959	1.016	0.996	0.896	0.862	1.014	1.039	1.022	1.051	0.881	1.036	1.039	1.042	0.99	1.003	0.99	1.025	0.896	1.053	1.026	0.995	1.064
									0.869	1.011	1.045	1.016	0.738	0.98	1.03	1.081	1.071	1.128	1.109	1.007	1.08	1.048	1.024	0.891	1.083	1.092	1.077	0.959	1.015	0.996	0.896	0.861	1.012	1.039	1.021	1.051	0.88	1.038	1.039	1.042	0.988	1.001	0.986	1.023	0.895	1.054	1.025	0.996	1.063
								4	0.87	1.011	1.045	1.016	0.737	0.979	1.029	1.079	1.071	1.129	1.108	1.005	1.079	1.048	1.022	0.893	1.082	1.089	1.075	0.959	1.013	0.995	0.898	0.863	1.011	1.04	1.019	1.048	0.882	1.039	1.039	1.043	0.986	1.001	0.985	1.023	0.896	1.054	1.024	0.995	1.063
									0.87	1.01	1.045	1.016	0.736	0.979	1.03	1.079	1.071	1.129	1.108	1.002	1.078	1.047	1.02	0.892	1.079	1.088	1.074	0.962	1.011	0.994	0.897	0.863	1.011	1.038	1.019	1.048	0.883	1.039	1.038	1.043	0.986	1.001	0.982	1.021	0.896	1.054	1.023	0.997	1.064
									0.869	1.01	1.044	1.015	0.734	0.977	1.031	1.078	1.07	1.129	1.109	1.001	1.077	1.045	1.02	0.893	1.075	1.084	1.075	0.962	1.008	0.995	0.899	0.862	1.011	1.038	1.019	1.05	0.886	1.041	1.036	1.044	0.982	0.999	0.978	1.02	0.896	1.058	1.025	1	1.063
									0.87	1.008	1.043	1.013	0.733	0.974	1.031	1.078	1.07	1.13	1.109	0.999	1.076	1.047	1.018	0.893	1.074	1.083	1.072	0.961	1.006	0.994	0.898	0.861	1.011	1.036	1.017	1.048	0.887	1.042	1.035	1.044	0.982	0.995	0.978	1.02	0.897	1.054	1.027	1	1.063
									0.87	1.009	1.044	1.011	0.731	0.975	1.029	1.078	1.07	1.129	1.11	1	1.074	1.044	1.017	0.894	1.072	1.081	1.072	0.961	1.008	0.992	0.899	0.861	1.009	1.036	1.019	1.046	0.889	1.043	1.034	1.044	0.981	0.993	0.978	1.019	0.898	1.052	1.026	1	1.062
									0.871	1.012	1.049	1.013	0.73	0.976	1.028	1.077	1.07	1.129	1.111	0.997	1.072	1.044	1.018	0.898	1.07	1.079	1.07	0.961	1.007	0.993	0.899	0.859	1.01	1.039	1.021	1.047	0.892	1.043	1.034	1.044	0.98	0.994	0.976	1.021	0.898	1.053	1.028	1.002	1.063
									0.871	1.012	1.043	1.007	0.729	0.975	1.027	1.078	1.07	1.13	1.112	0.996	1.069	1.041	1.016	0.896	1.067	1.077	1.068	0.96	1.004	0.99	0.9	0.857	1.015	1.039	1.018	1.05	0.893	1.042	1.034	1.044	0.979	0.994	0.977	1.02	0.901	1.055	1.027	1.003	1.062
									0.877	1.022	1.053	1.011	0.728	0.976	1.028	1.075	1.07	1.129	1.114	0.99	1.073	1.046	1.018	0.903	1.065	1.075	1.068	0.962	1.002	0.988	0.9	0.857	1.024	1.044	1.019	1.043	0.894	1.044	1.034	1.042	0.979	0.991	0.975	1.018	0.909	1.065	1.028	1.005	1.064
									0.872	1.012	1.043	1.007	0.726	0.976	1.027	1.072	1.069	1.13	1.115	0.99	1.067	1.041	1.011	0.896	1.065	1.071	1.068	0.96	1.001	0.985	0.901	0.855	1.011	1.038	1.02	1.038	0.896	1.044	1.032	1.043	0.979	0.99	0.976	1.018	0.895	1.056	1.029	1.005	1.063
									0.869	1.01	1.046	1.009	0.725	0.974	1.026	1.07	1.068	1.128	1.115	0.989	1.069	1.041	1.012	0.896	1.063	1.07	1.067	0.962	0.998	0.984	0.9	0.855	1.017	1.037	1.02	1.048	0.899	1.042	1.034	1.042	0.977	0.988	0.973	1.017	0.896	1.065	1.029	1.004	1.063
									0.876	1.019	1.049	1.007	0.723	0.972	1.025	1.07	1.067	1.127	1.116	0.988	1.066	1.044	1.015	0.898	1.061	1.069	1.067	0.963	0.999	0.983	0.901	0.854	1.01	1.036	1.021	1.039	0.9	1.041	1.034	1.042	0.975	0.987	0.973	1.016	0.892	1.057	1.029	1.003	1.064
									0.874	1.013	1.047	1.009	0.722	0.972	1.025	1.069	1.067	1.128	1.116	0.985	1.065	1.046	1.012	0.904	1.058	1.066	1.066	0.964	1	0.981	0.9	0.854	1.016	1.039	1.021	1.043	0.902	1.042	1.032	1.042	0.974	0.987	0.97	1.017	0.892	1.061	1.027	1.004	1.065
									0.873	1.01	1.045	1.008	0.72	0.971	1.024	1.071	1.067	1.129	1.118	0.984	1.064	1.04	1.008	0.903	1.057	1.064	1.065	0.963	1.001	0.98	0.901	0.854	1.019	1.041	1.028	1.042	0.903	1.04	1.031	1.042	0.974	0.985	0.97	1.015	0.904	1.061	1.025	1.005	1.065
									0.874	1.009	1.046	1.01	0.719	0.971	1.026	1.071	1.068	1.13	1.118	0.985	1.063	1.041	1.008	0.9	1.054	1.062	1.063	0.963	0.997	0.978	0.898	0.853	1.01	1.037	1.017	1.039	0.902	1.039	1.03	1.043	0.975	0.982	0.969	1.015	0.893	1.057	1.025	1.006	1.064
									0.875	1.01	1.047	1.01	0.718	0.97	1.026	1.071	1.07	1.13	1.119	0.983	1.062	1.04	1.005	0.899	1.052	1.061	1.062	0.962	1	0.976	0.899	0.852	1.009	1.035	1.019	1.039	0.903	1.04	1.031	1.042	0.973	0.981	0.969	1.016	0.892	1.057	1.027	1.006	1.065
									0.875	1.011	1.044	1.01	0.716	0.971	1.025	1.072	1.071	1.132	1.119	0.979	1.06	1.037	1.005	0.899	1.051	1.057	1.06	0.963	0.998	0.978	0.898	0.85	1.012	1.033	1.018	1.041	0.904	1.041	1.029	1.041	0.974	0.979	0.967	1.015	0.894	1.058	1.025	1.007	1.066
									0.877	1.011	1.043	1.011	0.715	0.972	1.024	1.071	1.071	1.132	1.121	0.979	1.058	1.036	1.003	0.899	1.05	1.057	1.058	0.961	0.996	0.977	0.899	0.851	1.012	1.033	1.018	1.039	0.907	1.041	1.028	1.041	0.974	0.978	0.966	1.014	0.894	1.06	1.026	1.008	1.068
									0.879	1.01	1.044	1.009	0.714	0.97	1.024	1.071	1.072	1.131	1.121	0.982	1.057	1.037	1.003	0.898	1.047	1.053	1.058	0.962	0.998	0.974	0.898	0.847	1.01	1.033	1.018	1.039	0.908	1.041	1.028	1.041	0.972	0.978	0.965	1.013	0.894	1.061	1.025	1.007	1.07
									0.879	1.007	1.045	1.011	0.711	0.968	1.024	1.071	1.074	1.131	1.121	0.978	1.056	1.035	1.002	0.896	1.045	1.052	1.055	0.961	0.995	0.973	0.899	0.846	1.008	1.033	1.022	1.038	0.907	1.041	1.028	1.041	0.973	0.977	0.965	1.013	0.896	1.062	1.025	1.006	1.072
									0.88	1.006	1.044	1.013	0.71	0.967	1.023	1.072	1.074	1.131	1.121	0.979	1.055	1.034	1.002	0.895	1.043	1.052	1.053	0.962	0.994	0.972	0.898	0.844	1.01	1.033	1.019	1.036	0.908	1.041	1.028	1.041	0.973	0.975	0.963	1.012	0.896	1.063	1.026	1.005	1.073
									0.881	1.005	1.043	1.012	0.709	0.968	1.023	1.071	1.076	1.131	1.12	0.978	1.055	1.035	1.001	0.892	1.041	1.049	1.052	0.96	0.994	0.972	0.899	0.842	1.011	1.032	1.018	1.036	0.907	1.042	1.027	1.041	0.972	0.974	0.963	1.013	0.895	1.061	1.026	1.006	1.072
									0.879	1.005	1.043	1.013	0.706	0.967	1.022	1.072	1.075	1.13	1.122	0.977	1.055	1.036	1.001	0.89	1.041	1.048	1.05	0.959	0.993	0.973	0.899	0.842	1.01	1.032	1.018	1.036	0.907	1.044	1.026	1.041	0.973	0.973	0.964	1.011	0.897	1.064	1.024	1.004	1.074
									0.88	1.004	1.052	1.018	0.705	0.966	1.022	1.072	1.076	1.133	1.122	0.978	1.056	1.039	1.002	0.887	1.039	1.047	1.046	0.958	0.994	0.973	0.898	0.839	1.011	1.032	1.021	1.04	0.906	1.043	1.026	1.041	0.975	0.974	0.963	1.01	0.896	1.064	1.023	1.006	1.075
									0.881	1.006	1.048	1.013	0.703	0.966	1.021	1.072	1.078	1.134	1.123	0.982	1.051	1.034	1.003	0.888	1.038	1.045	1.045	0.959	0.992	0.973	0.897	0.837	1.012	1.029	1.013	1.032	0.907	1.046	1.026	1.041	0.976	0.971	0.961	1.013	0.896	1.064	1.022	1.004	1.077
									0.88	1.006	1.049	1.01	0.702	0.966	1.02	1.071	1.078	1.135	1.123	0.98	1.05	1.031	0.996	0.881	1.038	1.046	1.044	0.958	0.993	0.975	0.896	0.837	1.017	1.03	1.015	1.032	0.906	1.046	1.024	1.041	0.977	0.971	0.961	1.013	0.897	1.064	1.022	1.004	1.079
									0.877	1.003	1.048	1.016	0.703	0.966	1.018	1.07	1.078	1.135	1.124	0.979	1.061	1.037	0.999	0.884	1.038	1.044	1.043	0.957	0.996	0.975	0.895	0.836	1.012	1.029	1.017	1.031	0.907	1.047	1.024	1.041	0.976	0.973	0.962	1.015	0.899	1.065	1.021	1.005	1.08
									0.877	1.007	1.051	1.012	0.702	0.965	1.017	1.069	1.078	1.134	1.122	0.982	1.053	1.033	0.998	0.885	1.034	1.042	1.042	0.958	0.996	0.975	0.893	0.836	1.016	1.031	1.022	1.035	0.909	1.047	1.022	1.039	0.977	0.97	0.96	1.015	0.898	1.065	1.021	1.006	1.079
									0.882	1.008	1.052	1.012	0.702	0.964	1.017	1.07	1.077	1.135	1.12	0.985	1.053	1.038	1.005	0.888	1.032	1.042	1.042	0.958	0.996	0.974	0.893	0.836	1.009	1.032	1.016	1.029	0.908	1.047	1.022	1.039	0.975	0.969	0.961	1.014	0.899	1.065	1.021	1.006	1.079
									0.883	1.01	1.056	1.025	0.701	0.964	1.015	1.069	1.076	1.135	1.12	0.984	1.058	1.034	1.006	0.886	1.033	1.042	1.041	0.957	0.997	0.976	0.893	0.836	1.014	1.035	1.018	1.028	0.907	1.047	1.021	1.038	0.977	0.972	0.961	1.013	0.902	1.071	1.021	1.006	1.079
									0.877	1.012	1.052	1.014	0.7	0.964	1.014	1.068	1.076	1.136	1.119	0.981	1.051	1.033	0.999	0.883	1.033	1.04	1.039	0.956	0.998	0.976	0.892	0.834	1.014	1.036	1.014	1.037	0.908	1.047	1.019	1.036	0.98	0.973	0.961	1.014	0.903	1.068	1.019	1.006	1.083
								5	0.875	1.013	1.053	1.014	0.698	0.965	1.013	1.067	1.077	1.137	1.118	0.982	1.052	1.031	0.999	0.881	1.028	1.038	1.036	0.955	0.998	0.976	0.891	0.831	1.008	1.03	1.008	1.028	0.909	1.048	1.018	1.038	0.979	0.975	0.958	1.014	0.903	1.06	1.019	1.007	1.083
									0.874	1.014	1.053	1.015	0.699	0.966	1.012	1.066	1.076	1.139	1.119	0.985	1.049	1.031	0.998	0.881	1.025	1.034	1.036	0.957	0.998	0.976	0.89	0.831	1.006	1.028	1.009	1.026	0.911	1.048	1.017	1.038	0.979	0.972	0.958	1.016	0.904	1.06	1.017	1.007	1.087
									0.874	1.016	1.054	1.019	0.697	0.965	1.012	1.066	1.075	1.139	1.12	0.987	1.051	1.033	0.999	0.881	1.025	1.033	1.036	0.957	0.998	0.976	0.889	0.831	1.007	1.028	1.009	1.026	0.911	1.048	1.015	1.035	0.979	0.973	0.958	1.015	0.907	1.063	1.016	1.007	1.089
									0.875	1.019	1.052	1.021	0.696	0.965	1.009	1.065	1.075	1.14	1.121	0.987	1.053	1.031	0.999	0.88	1.026	1.033	1.036	0.957	0.999	0.976	0.888	0.829	1.007	1.027	1.009	1.024	0.913	1.048	1.015	1.034	0.98	0.971	0.96	1.015	0.906	1.065	1.016	1.008	1.089
									0.876	1.021	1.051	1.02	0.696	0.965	1.01	1.065	1.076	1.14	1.121	0.988	1.051	1.032	1	0.878	1.025	1.032	1.034	0.956	0.999	0.976	0.888	0.826	1.006	1.029	1.008	1.024	0.914	1.047	1.016	1.034	0.982	0.972	0.96	1.018	0.905	1.066	1.017	1.009	1.091
									0.876	1.022	1.051	1.021	0.696	0.965	1.009	1.063	1.079	1.139	1.122	0.992	1.052	1.03	0.999	0.879	1.025	1.031	1.035	0.955	1.001	0.978	0.888	0.824	1.008	1.029	1.009	1.026	0.915	1.048	1.014	1.033	0.985	0.971	0.961	1.017	0.91	1.068	1.016	1.009	1.09
									0.877	1.022	1.053	1.022	0.695	0.965	1.009	1.063	1.08	1.141	1.124	0.993	1.051	1.032	0.999	0.878	1.025	1.028	1.035	0.955	1.003	0.978	0.888	0.823	1.007	1.029	1.01	1.026	0.916	1.048	1.012	1.032	0.986	0.971	0.96	1.018	0.909	1.069	1.015	1.011	1.092
									0.875	1.021	1.054	1.023	0.694	0.966	1.009	1.061	1.08	1.141	1.124	0.992	1.051	1.032	0.998	0.877	1.024	1.029	1.034	0.954	1.003	0.98	0.887	0.82	1.008	1.029	1.008	1.028	0.916	1.049	1.012	1.033	0.986	0.97	0.96	1.018	0.908	1.07	1.015	1.013	1.092
									0.879	1.023	1.055	1.023	0.692	0.965	1.009	1.061	1.081	1.142	1.127	0.993	1.05	1.033	0.999	0.877	1.026	1.029	1.031	0.955	1.003	0.981	0.885	0.82	1.01	1.03	1.011	1.028	0.917	1.049	1.011	1.032	0.989	0.97	0.959	1.018	0.909	1.072	1.015	1.014	1.093
									0.88	1.021	1.057	1.023	0.69	0.965	1.009	1.059	1.083	1.143	1.128	0.992	1.049	1.033	1.001	0.877	1.024	1.029	1.03	0.957	1.002	0.983	0.882	0.821	1.011	1.03	1.012	1.026	0.917	1.05	1.011	1.033	0.991	0.97	0.959	1.019	0.912	1.073	1.016	1.015	1.094
									0.88	1.021	1.054	1.024	0.69	0.963	1.009	1.059	1.084	1.144	1.131	0.995	1.049	1.033	1.003	0.876	1.023	1.027	1.03	0.957	1.005	0.983	0.884	0.822	1.014	1.029	1.01	1.026	0.92	1.05	1.011	1.032	0.991	0.97	0.958	1.02	0.913	1.072	1.016	1.015	1.092
									0.886	1.025	1.061	1.032	0.689	0.963	1.009	1.058	1.084	1.146	1.134	0.997	1.059	1.044	1.008	0.882	1.022	1.025	1.03	0.957	1.006	0.983	0.883	0.821	1.023	1.039	1.013	1.032	0.921	1.049	1.012	1.033	0.993	0.97	0.959	1.021	0.924	1.08	1.014	1.015	1.092
									0.881	1.03	1.061	1.03	0.688	0.961	1.01	1.056	1.085	1.147	1.134	0.997	1.049	1.034	1.007	0.872	1.022	1.024	1.028	0.957	1.007	0.984	0.883	0.819	1.017	1.03	1.009	1.027	0.921	1.048	1.012	1.032	0.995	0.968	0.959	1.023	0.914	1.07	1.014	1.016	1.094
									0.889	1.038	1.064	1.031	0.687	0.963	1.01	1.056	1.086	1.149	1.135	1	1.05	1.039	1.014	0.877	1.021	1.022	1.027	0.957	1.011	0.983	0.884	0.816	1.016	1.031	1.012	1.028	0.922	1.05	1.011	1.031	0.997	0.97	0.958	1.026	0.916	1.076	1.013	1.015	1.094
									0.88	1.03	1.06	1.03	0.686	0.964	1.01	1.057	1.086	1.151	1.136	1.001	1.046	1.035	1.009	0.868	1.019	1.021	1.027	0.957	1.01	0.983	0.883	0.814	1.018	1.032	1.007	1.028	0.924	1.05	1.011	1.031	1	0.972	0.959	1.026	0.915	1.073	1.013	1.015	1.097
									0.884	1.037	1.061	1.031	0.685	0.965	1.01	1.056	1.086	1.154	1.137	1.004	1.048	1.035	1.01	0.866	1.017	1.021	1.026	0.959	1.012	0.984	0.884	0.813	1.016	1.03	1.006	1.036	0.926	1.051	1.01	1.032	1.001	0.973	0.958	1.028	0.922	1.076	1.012	1.014	1.099
									0.879	1.03	1.059	1.034	0.684	0.965	1.01	1.056	1.086	1.156	1.136	1.008	1.05	1.04	1.012	0.867	1.019	1.02	1.027	0.957	1.013	0.984	0.881	0.811	1.018	1.026	1.005	1.03	0.927	1.051	1.009	1.032	1.002	0.975	0.958	1.029	0.917	1.079	1.011	1.014	1.101
									0.878	1.035	1.06	1.038	0.682	0.964	1.01	1.055	1.084	1.157	1.136	1.008	1.049	1.038	1.009	0.866	1.02	1.019	1.025	0.957	1.013	0.986	0.878	0.812	1.019	1.026	1.005	1.03	0.927	1.05	1.009	1.032	1.004	0.974	0.955	1.03	0.917	1.075	1.01	1.014	1.103
									0.878	1.033	1.061	1.039	0.682	0.965	1.01	1.055	1.083	1.156	1.136	1.009	1.052	1.038	1.01	0.866	1.022	1.018	1.025	0.957	1.015	0.987	0.877	0.81	1.017	1.025	1.006	1.031	0.928	1.05	1.009	1.03	1.007	0.977	0.953	1.032	0.916	1.077	1.008	1.016	1.105
									0.876	1.031	1.062	1.043	0.682	0.964	1.011	1.055	1.083	1.155	1.137	1.012	1.049	1.037	1.012	0.866	1.022	1.02	1.025	0.956	1.016	0.99	0.877	0.811	1.017	1.023	1.006	1.03	0.928	1.052	1.009	1.031	1.008	0.978	0.953	1.033	0.92	1.074	1.008	1.018	1.106
									0.878	1.032	1.064	1.043	0.681	0.964	1.011	1.055	1.084	1.158	1.138	1.014	1.048	1.039	1.014	0.866	1.021	1.019	1.026	0.957	1.017	0.991	0.877	0.809	1.016	1.022	1.004	1.029	0.928	1.052	1.01	1.032	1.008	0.979	0.956	1.034	0.922	1.071	1.007	1.018	1.107
									0.877	1.033	1.064	1.043	0.681	0.965	1.013	1.055	1.085	1.159	1.139	1.015	1.049	1.038	1.015	0.865	1.023	1.019	1.025	0.957	1.018	0.99	0.877	0.808	1.016	1.021	1.004	1.028	0.928	1.053	1.01	1.032	1.011	0.981	0.959	1.037	0.923	1.069	1.008	1.019	1.109
									0.88	1.034	1.065	1.044	0.68	0.965	1.013	1.053	1.088	1.16	1.141	1.022	1.047	1.04	1.015	0.864	1.024	1.02	1.024	0.957	1.022	0.994	0.876	0.806	1.018	1.021	1.003	1.03	0.927	1.055	1.01	1.033	1.012	0.982	0.954	1.037	0.927	1.069	1.008	1.02	1.108
									0.879	1.034	1.067	1.044	0.679	0.964	1.014	1.051	1.091	1.162	1.141	1.025	1.048	1.04	1.016	0.861	1.02	1.019	1.026	0.956	1.026	0.995	0.875	0.805	1.019	1.021	1.002	1.032	0.927	1.055	1.009	1.033	1.014	0.981	0.946	1.04	0.93	1.072	1.008	1.02	1.106
									0.879	1.034	1.068	1.046	0.677	0.963	1.015	1.051	1.092	1.163	1.141	1.027	1.049	1.041	1.02	0.861	1.019	1.019	1.026	0.956	1.028	0.997	0.874	0.805	1.018	1.018	1.004	1.032	0.93	1.056	1.01	1.035	1.015	0.981	0.944	1.042	0.93	1.073	1.01	1.019	1.108
									0.884	1.038	1.073	1.048	0.676	0.962	1.017	1.05	1.093	1.163	1.142	1.03	1.055	1.04	1.023	0.865	1.019	1.017	1.025	0.957	1.026	0.999	0.871	0.803	1.019	1.02	1.008	1.031	0.931	1.056	1.01	1.033	1.016	0.983	0.943	1.046	0.928	1.074	1.011	1.018	1.109
									0.872	1.034	1.072	1.048	0.676	0.963	1.016	1.051	1.094	1.162	1.144	1.033	1.052	1.04	1.023	0.862	1.02	1.018	1.026	0.956	1.027	1.001	0.871	0.802	1.022	1.024	1.002	1.03	0.929	1.056	1.009	1.033	1.017	0.983	0.943	1.047	0.925	1.076	1.01	1.02	1.111
									0.88	1.031	1.075	1.05	0.674	0.963	1.017	1.052	1.095	1.162	1.147	1.035	1.052	1.039	1.019	0.861	1.019	1.02	1.025	0.959	1.029	1.001	0.869	0.802	1.02	1.024	1.002	1.029	0.928	1.057	1.009	1.035	1.018	0.985	0.945	1.047	0.921	1.078	1.008	1.021	1.113
									0.88	1.031	1.075	1.051	0.673	0.964	1.016	1.053	1.095	1.163	1.148	1.038	1.052	1.04	1.018	0.86	1.018	1.018	1.026	0.96	1.032	1.002	0.867	0.803	1.02	1.019	1.003	1.03	0.929	1.058	1.008	1.033	1.018	0.986	0.945	1.049	0.921	1.077	1.008	1.021	1.114
									0.885	1.031	1.079	1.052	0.673	0.964	1.015	1.054	1.094	1.164	1.149	1.041	1.052	1.04	1.017	0.858	1.02	1.019	1.026	0.961	1.033	1.002	0.867	0.804	1.02	1.017	1.001	1.027	0.929	1.059	1.008	1.034	1.019	0.988	0.946	1.051	0.921	1.078	1.008	1.025	1.114
								6	0.88	1.032	1.076	1.055	0.671	0.966	1.013	1.054	1.093	1.166	1.15	1.043	1.053	1.041	1.017	0.857	1.02	1.017	1.027	0.962	1.036	1.004	0.864	0.804	1.019	1.017	1.001	1.026	0.929	1.06	1.01	1.034	1.02	0.991	0.946	1.054	0.923	1.078	1.007	1.026	1.113
									0.882	1.033	1.077	1.054	0.671	0.968	1.013	1.053	1.095	1.167	1.151	1.046	1.055	1.042	1.017	0.856	1.022	1.018	1.026	0.962	1.037	1.004	0.863	0.803	1.018	1.016	1.004	1.027	0.93	1.06	1.01	1.034	1.022	0.992	0.949	1.054	0.923	1.078	1.008	1.027	1.113
									0.877	1.034	1.074	1.056	0.669	0.969	1.012	1.052	1.093	1.169	1.15	1.051	1.054	1.041	1.018	0.855	1.023	1.018	1.028	0.962	1.038	1.006	0.862	0.804	1.019	1.021	1.007	1.026	0.93	1.062	1.011	1.033	1.023	0.994	0.949	1.055	0.924	1.077	1.009	1.027	1.114
									0.876	1.036	1.074	1.058	0.668	0.969	1.012	1.051	1.094	1.17	1.151	1.051	1.053	1.042	1.021	0.855	1.023	1.018	1.027	0.964	1.04	1.008	0.863	0.803	1.018	1.018	1.005	1.024	0.928	1.063	1.011	1.032	1.026	0.995	0.951	1.056	0.923	1.076	1.011	1.026	1.116
									0.878	1.034	1.073	1.061	0.667	0.97	1.011	1.05	1.092	1.171	1.152	1.052	1.054	1.042	1.021	0.854	1.022	1.018	1.026	0.964	1.04	1.011	0.864	0.802	1.015	1.018	1.004	1.024	0.928	1.065	1.01	1.032	1.028	0.997	0.953	1.058	0.92	1.078	1.009	1.028	1.118
									0.877	1.034	1.076	1.061	0.665	0.971	1.011	1.051	1.09	1.174	1.154	1.054	1.056	1.045	1.021	0.853	1.023	1.019	1.026	0.963	1.043	1.013	0.864	0.801	1.014	1.02	1.007	1.025	0.928	1.065	1.012	1.03	1.029	0.997	0.952	1.058	0.919	1.078	1.009	1.03	1.12
									0.877	1.032	1.076	1.061	0.663	0.972	1.011	1.053	1.089	1.176	1.156	1.058	1.056	1.046	1.02	0.85	1.023	1.016	1.026	0.962	1.046	1.015	0.863	0.802	1.015	1.018	1.008	1.025	0.927	1.067	1.014	1.031	1.032	0.999	0.954	1.058	0.922	1.078	1.01	1.033	1.123
									0.877	1.033	1.078	1.061	0.661	0.971	1.011	1.054	1.088	1.177	1.156	1.062	1.057	1.046	1.021	0.85	1.019	1.017	1.028	0.962	1.046	1.015	0.863	0.801	1.015	1.019	1.008	1.026	0.927	1.066	1.015	1.032	1.033	1.001	0.953	1.06	0.925	1.078	1.01	1.035	1.123
									0.879	1.034	1.079	1.06	0.659	0.97	1.01	1.053	1.088	1.177	1.155	1.063	1.058	1.046	1.023	0.85	1.017	1.018	1.028	0.962	1.047	1.017	0.862	0.801	1.014	1.017	1.009	1.029	0.929	1.066	1.016	1.031	1.034	1.006	0.955	1.059	0.929	1.079	1.011	1.036	1.12
									0.879	1.034	1.078	1.057	0.659	0.969	1.011	1.052	1.088	1.177	1.154	1.066	1.058	1.047	1.022	0.848	1.02	1.017	1.028	0.959	1.049	1.018	0.861	0.799	1.014	1.018	1.011	1.03	0.929	1.067	1.016	1.034	1.034	1.006	0.957	1.059	0.932	1.077	1.011	1.035	1.119
									0.88	1.036	1.078	1.057	0.657	0.969	1.01	1.054	1.089	1.176	1.153	1.071	1.057	1.049	1.023	0.847	1.018	1.017	1.03	0.962	1.05	1.019	0.861	0.798	1.014	1.02	1.013	1.031	0.929	1.067	1.018	1.033	1.033	1.005	0.959	1.061	0.937	1.075	1.012	1.035	1.118
									0.881	1.039	1.081	1.058	0.657	0.968	1.011	1.056	1.091	1.176	1.154	1.072	1.059	1.05	1.025	0.848	1.022	1.018	1.031	0.961	1.053	1.021	0.861	0.797	1.015	1.019	1.018	1.029	0.929	1.066	1.019	1.033	1.036	1.006	0.962	1.061	0.935	1.075	1.011	1.034	1.12
									0.886	1.039	1.08	1.06	0.656	0.968	1.012	1.057	1.091	1.175	1.154	1.074	1.06	1.051	1.023	0.848	1.023	1.016	1.03	0.962	1.054	1.023	0.862	0.797	1.017	1.021	1.013	1.029	0.93	1.065	1.019	1.034	1.039	1.006	0.96	1.062	0.937	1.073	1.012	1.033	1.121
									0.888	1.04	1.079	1.062	0.655	0.967	1.012	1.055	1.092	1.174	1.156	1.077	1.058	1.051	1.024	0.85	1.024	1.02	1.03	0.962	1.056	1.025	0.862	0.797	1.017	1.02	1.014	1.03	0.93	1.065	1.019	1.034	1.041	1.007	0.96	1.064	0.939	1.074	1.013	1.033	1.12
									0.889	1.04	1.081	1.067	0.655	0.968	1.013	1.054	1.093	1.175	1.157	1.083	1.058	1.054	1.027	0.849	1.026	1.019	1.031	0.961	1.059	1.028	0.863	0.796	1.016	1.018	1.014	1.03	0.929	1.067	1.021	1.034	1.042	1.009	0.961	1.065	0.941	1.073	1.013	1.033	1.121
									0.886	1.041	1.081	1.07	0.654	0.969	1.013	1.054	1.092	1.176	1.156	1.087	1.06	1.052	1.026	0.849	1.025	1.022	1.031	0.96	1.061	1.03	0.863	0.795	1.016	1.018	1.016	1.031	0.927	1.068	1.021	1.036	1.044	1.012	0.965	1.066	0.939	1.072	1.013	1.034	1.123
									0.886	1.041	1.081	1.074	0.654	0.971	1.013	1.054	1.092	1.178	1.154	1.088	1.06	1.054	1.026	0.848	1.028	1.023	1.03	0.959	1.065	1.031	0.864	0.794	1.016	1.018	1.016	1.032	0.929	1.068	1.02	1.036	1.044	1.011	0.965	1.068	0.938	1.072	1.014	1.035	1.123
									0.887	1.041	1.082	1.077	0.653	0.973	1.014	1.055	1.09	1.177	1.155	1.091	1.06	1.053	1.027	0.847	1.029	1.023	1.031	0.961	1.067	1.034	0.863	0.793	1.017	1.02	1.016	1.032	0.93	1.069	1.021	1.036	1.045	1.012	0.964	1.069	0.937	1.071	1.015	1.036	1.127
									0.887	1.041	1.085	1.076	0.651	0.974	1.016	1.056	1.09	1.177	1.157	1.094	1.061	1.055	1.03	0.846	1.029	1.022	1.032	0.959	1.069	1.034	0.863	0.794	1.016	1.021	1.016	1.032	0.929	1.069	1.021	1.035	1.046	1.012	0.966	1.071	0.936	1.069	1.016	1.037	1.128
									0.89	1.041	1.085	1.077	0.649	0.974	1.016	1.056	1.089	1.179	1.157	1.097	1.064	1.056	1.03	0.844	1.031	1.024	1.031	0.959	1.074	1.035	0.863	0.793	1.016	1.022	1.014	1.034	0.928	1.07	1.023	1.037	1.048	1.014	0.967	1.073	0.935	1.066	1.015	1.036	1.128
									0.887	1.041	1.086	1.076	0.648	0.975	1.015	1.057	1.087	1.181	1.158	1.099	1.066	1.058	1.032	0.844	1.032	1.023	1.033	0.96	1.074	1.038	0.862	0.792	1.016	1.023	1.017	1.035	0.928	1.071	1.024	1.036	1.047	1.016	0.969	1.074	0.938	1.065	1.014	1.037	1.131
									0.884	1.039	1.085	1.078	0.647	0.973	1.017	1.058	1.088	1.181	1.16	1.102	1.066	1.059	1.033	0.845	1.031	1.026	1.034	0.96	1.076	1.038	0.861	0.792	1.015	1.024	1.017	1.035	0.928	1.068	1.025	1.034	1.048	1.016	0.969	1.076	0.941	1.064	1.015	1.038	1.133
									0.885	1.037	1.087	1.077	0.646	0.973	1.019	1.058	1.087	1.182	1.162	1.104	1.067	1.059	1.034	0.844	1.032	1.028	1.036	0.96	1.078	1.039	0.861	0.79	1.016	1.024	1.019	1.036	0.927	1.068	1.025	1.034	1.049	1.02	0.97	1.077	0.942	1.064	1.018	1.039	1.135
									0.882	1.037	1.087	1.081	0.644	0.975	1.02	1.06	1.085	1.185	1.165	1.108	1.066	1.06	1.033	0.846	1.034	1.03	1.035	0.959	1.079	1.039	0.859	0.79	1.012	1.025	1.021	1.034	0.927	1.07	1.025	1.035	1.052	1.018	0.972	1.076	0.943	1.063	1.018	1.04	1.136
									0.88	1.039	1.086	1.08	0.643	0.975	1.021	1.06	1.081	1.187	1.168	1.11	1.067	1.059	1.034	0.846	1.033	1.031	1.036	0.959	1.08	1.041	0.86	0.788	1.012	1.025	1.021	1.033	0.927	1.071	1.024	1.036	1.054	1.021	0.975	1.08	0.94	1.063	1.019	1.043	1.137
									0.882	1.039	1.085	1.084	0.641	0.976	1.024	1.06	1.081	1.189	1.169	1.113	1.067	1.059	1.035	0.846	1.035	1.033	1.035	0.958	1.083	1.044	0.859	0.789	1.012	1.026	1.022	1.032	0.927	1.072	1.026	1.036	1.056	1.02	0.976	1.081	0.94	1.064	1.018	1.044	1.138
									0.882	1.038	1.084	1.082	0.641	0.976	1.023	1.063	1.082	1.188	1.169	1.116	1.069	1.059	1.036	0.845	1.036	1.033	1.036	0.958	1.084	1.047	0.856	0.788	1.012	1.029	1.02	1.033	0.927	1.073	1.027	1.035	1.055	1.021	0.978	1.082	0.94	1.064	1.02	1.045	1.138
									0.882	1.036	1.083	1.083	0.639	0.977	1.023	1.063	1.083	1.188	1.168	1.114	1.07	1.06	1.036	0.846	1.037	1.035	1.038	0.956	1.085	1.047	0.856	0.789	1.014	1.028	1.018	1.033	0.928	1.072	1.029	1.034	1.055	1.023	0.979	1.082	0.94	1.064	1.019	1.047	1.139
									0.882	1.036	1.085	1.084	0.638	0.976	1.024	1.066	1.083	1.188	1.168	1.116	1.073	1.06	1.035	0.845	1.04	1.033	1.039	0.958	1.09	1.049	0.856	0.788	1.014	1.029	1.019	1.035	0.929	1.07	1.031	1.035	1.057	1.024	0.98	1.083	0.94	1.064	1.019	1.048	1.139
									0.881	1.038	1.087	1.084	0.638	0.977	1.026	1.068	1.084	1.189	1.167	1.117	1.072	1.061	1.037	0.845	1.044	1.035	1.041	0.959	1.091	1.049	0.859	0.786	1.013	1.026	1.017	1.036	0.928	1.071	1.033	1.036	1.056	1.024	0.979	1.083	0.938	1.065	1.02	1.048	1.139
								7	0.877	1.039	1.088	1.082	0.637	0.976	1.027	1.07	1.082	1.189	1.166	1.119	1.073	1.061	1.038	0.844	1.043	1.036	1.043	0.959	1.093	1.05	0.859	0.785	1.015	1.027	1.014	1.037	0.926	1.072	1.034	1.038	1.055	1.026	0.98	1.084	0.939	1.065	1.021	1.048	1.138
									0.875	1.038	1.087	1.082	0.636	0.976	1.028	1.07	1.081	1.19	1.165	1.12	1.076	1.061	1.039	0.843	1.043	1.038	1.045	0.96	1.092	1.051	0.86	0.783	1.017	1.026	1.015	1.036	0.924	1.072	1.034	1.038	1.058	1.026	0.983	1.084	0.941	1.064	1.022	1.05	1.138
									0.872	1.038	1.088	1.081	0.635	0.976	1.029	1.07	1.079	1.189	1.165	1.122	1.075	1.061	1.04	0.845	1.047	1.04	1.044	0.96	1.093	1.052	0.863	0.782	1.019	1.025	1.016	1.035	0.923	1.073	1.037	1.039	1.058	1.027	0.984	1.083	0.946	1.064	1.023	1.052	1.138
									0.871	1.04	1.087	1.083	0.635	0.976	1.03	1.069	1.077	1.19	1.165	1.126	1.073	1.062	1.041	0.846	1.047	1.039	1.046	0.961	1.095	1.055	0.865	0.781	1.018	1.025	1.017	1.038	0.923	1.074	1.036	1.039	1.058	1.028	0.984	1.085	0.946	1.064	1.023	1.053	1.137
									0.872	1.041	1.087	1.087	0.634	0.977	1.031	1.071	1.075	1.19	1.165	1.129	1.073	1.061	1.042	0.848	1.048	1.04	1.046	0.962	1.099	1.058	0.866	0.78	1.018	1.025	1.018	1.038	0.923	1.074	1.037	1.04	1.061	1.032	0.983	1.085	0.948	1.063	1.023	1.052	1.138
									0.875	1.039	1.087	1.088	0.633	0.979	1.032	1.07	1.073	1.189	1.164	1.13	1.073	1.065	1.043	0.85	1.051	1.044	1.047	0.961	1.101	1.059	0.868	0.777	1.017	1.025	1.018	1.037	0.92	1.073	1.036	1.039	1.061	1.032	0.984	1.086	0.948	1.06	1.023	1.055	1.138
									0.879	1.039	1.09	1.089	0.631	0.98	1.033	1.072	1.073	1.189	1.163	1.132	1.077	1.065	1.043	0.852	1.052	1.047	1.048	0.962	1.103	1.059	0.867	0.777	1.017	1.026	1.019	1.038	0.92	1.072	1.037	1.041	1.061	1.033	0.986	1.087	0.948	1.061	1.024	1.058	1.139
									0.881	1.039	1.089	1.087	0.63	0.979	1.032	1.073	1.073	1.189	1.166	1.133	1.076	1.067	1.044	0.852	1.054	1.048	1.047	0.962	1.105	1.061	0.867	0.774	1.017	1.025	1.023	1.038	0.919	1.072	1.04	1.041	1.062	1.032	0.988	1.088	0.951	1.061	1.023	1.06	1.138
									0.883	1.037	1.091	1.082	0.629	0.98	1.033	1.072	1.074	1.187	1.166	1.133	1.079	1.066	1.043	0.85	1.057	1.048	1.049	0.963	1.106	1.063	0.866	0.773	1.019	1.025	1.025	1.04	0.917	1.071	1.041	1.042	1.063	1.033	0.989	1.088	0.953	1.062	1.024	1.061	1.137
									0.883	1.035	1.09	1.08	0.628	0.981	1.034	1.074	1.072	1.187	1.165	1.135	1.079	1.067	1.044	0.851	1.056	1.05	1.049	0.962	1.108	1.065	0.865	0.772	1.018	1.027	1.026	1.04	0.916	1.071	1.042	1.042	1.065	1.035	0.991	1.087	0.958	1.061	1.026	1.061	1.136
									0.883	1.035	1.09	1.081	0.627	0.979	1.036	1.077	1.071	1.187	1.165	1.137	1.081	1.067	1.045	0.852	1.058	1.052	1.05	0.962	1.11	1.065	0.865	0.77	1.021	1.027	1.029	1.04	0.914	1.07	1.043	1.043	1.066	1.035	0.993	1.086	0.96	1.063	1.026	1.063	1.135
									0.886	1.036	1.091	1.081	0.626	0.979	1.038	1.077	1.068	1.186	1.162	1.138	1.083	1.068	1.045	0.854	1.059	1.052	1.05	0.962	1.113	1.068	0.865	0.769	1.02	1.027	1.029	1.041	0.912	1.069	1.045	1.042	1.067	1.035	0.992	1.086	0.963	1.061	1.027	1.064	1.136
									0.887	1.037	1.094	1.081	0.625	0.98	1.038	1.078	1.066	1.184	1.162	1.141	1.084	1.068	1.046	0.854	1.06	1.055	1.052	0.962	1.114	1.069	0.865	0.769	1.023	1.027	1.031	1.043	0.911	1.069	1.046	1.043	1.07	1.036	0.993	1.086	0.966	1.06	1.027	1.065	1.135
									0.889	1.039	1.097	1.082	0.624	0.979	1.038	1.079	1.064	1.184	1.162	1.141	1.087	1.068	1.045	0.855	1.061	1.056	1.053	0.962	1.118	1.07	0.867	0.768	1.022	1.027	1.03	1.044	0.911	1.067	1.046	1.045	1.071	1.036	0.993	1.086	0.968	1.061	1.025	1.064	1.137
									0.89	1.039	1.095	1.083	0.622	0.978	1.039	1.081	1.064	1.182	1.162	1.142	1.087	1.069	1.046	0.854	1.062	1.055	1.054	0.962	1.121	1.073	0.866	0.767	1.024	1.026	1.031	1.043	0.911	1.068	1.046	1.045	1.071	1.038	0.993	1.085	0.966	1.061	1.023	1.065	1.137
									0.891	1.039	1.095	1.086	0.62	0.978	1.04	1.081	1.064	1.18	1.163	1.144	1.087	1.068	1.046	0.853	1.065	1.056	1.055	0.962	1.122	1.073	0.867	0.766	1.023	1.025	1.032	1.042	0.911	1.068	1.046	1.044	1.072	1.04	0.994	1.085	0.971	1.061	1.023	1.067	1.135
									0.89	1.037	1.096	1.085	0.619	0.977	1.04	1.081	1.062	1.179	1.164	1.145	1.088	1.068	1.049	0.854	1.066	1.056	1.056	0.963	1.124	1.075	0.87	0.765	1.022	1.027	1.034	1.042	0.911	1.068	1.047	1.044	1.072	1.042	0.994	1.086	0.969	1.062	1.025	1.068	1.134
									0.888	1.036	1.1	1.088	0.618	0.976	1.04	1.08	1.06	1.181	1.162	1.147	1.091	1.067	1.048	0.854	1.065	1.058	1.057	0.963	1.125	1.077	0.871	0.765	1.021	1.028	1.033	1.043	0.91	1.067	1.048	1.043	1.074	1.044	0.996	1.087	0.97	1.059	1.025	1.066	1.136
									0.885	1.032	1.099	1.09	0.615	0.976	1.042	1.08	1.06	1.181	1.162	1.15	1.095	1.072	1.055	0.853	1.066	1.06	1.057	0.963	1.127	1.077	0.871	0.765	1.022	1.026	1.032	1.042	0.909	1.067	1.048	1.043	1.074	1.043	0.996	1.087	0.974	1.056	1.024	1.066	1.136
									0.885	1.03	1.098	1.092	0.614	0.976	1.043	1.079	1.06	1.181	1.162	1.152	1.089	1.068	1.049	0.853	1.067	1.059	1.058	0.964	1.126	1.079	0.87	0.765	1.022	1.027	1.031	1.04	0.909	1.066	1.047	1.045	1.076	1.045	1	1.084	0.976	1.058	1.025	1.066	1.135
									0.885	1.031	1.097	1.092	0.613	0.975	1.043	1.08	1.058	1.18	1.162	1.152	1.09	1.067	1.048	0.855	1.069	1.063	1.059	0.963	1.128	1.078	0.871	0.765	1.024	1.029	1.029	1.04	0.91	1.066	1.047	1.045	1.076	1.047	1.002	1.081	0.979	1.056	1.024	1.066	1.135
									0.883	1.031	1.099	1.092	0.611	0.976	1.043	1.082	1.057	1.179	1.159	1.151	1.09	1.069	1.048	0.855	1.07	1.065	1.06	0.962	1.129	1.08	0.872	0.765	1.025	1.029	1.031	1.042	0.911	1.067	1.047	1.045	1.076	1.047	1.006	1.079	0.982	1.057	1.023	1.069	1.137
									0.885	1.029	1.099	1.092	0.61	0.978	1.04	1.084	1.055	1.176	1.156	1.152	1.091	1.07	1.048	0.856	1.071	1.066	1.06	0.963	1.133	1.081	0.874	0.763	1.025	1.028	1.032	1.044	0.912	1.067	1.049	1.044	1.075	1.047	1.006	1.079	0.983	1.055	1.023	1.07	1.135
									0.883	1.03	1.103	1.091	0.608	0.979	1.04	1.086	1.054	1.175	1.153	1.154	1.092	1.071	1.047	0.857	1.072	1.066	1.061	0.963	1.132	1.083	0.877	0.761	1.025	1.027	1.033	1.043	0.912	1.067	1.049	1.045	1.076	1.047	1.008	1.079	0.984	1.053	1.024	1.072	1.134
									0.881	1.028	1.105	1.091	0.607	0.981	1.04	1.088	1.056	1.173	1.152	1.155	1.092	1.071	1.048	0.859	1.073	1.068	1.061	0.965	1.135	1.083	0.878	0.759	1.026	1.026	1.032	1.043	0.911	1.067	1.049	1.045	1.075	1.048	1.009	1.079	0.989	1.053	1.022	1.073	1.133
									0.88	1.027	1.105	1.091	0.606	0.982	1.039	1.089	1.058	1.171	1.151	1.155	1.094	1.071	1.046	0.86	1.074	1.069	1.062	0.965	1.135	1.084	0.879	0.759	1.03	1.028	1.033	1.043	0.908	1.068	1.049	1.047	1.076	1.048	1.008	1.079	0.992	1.053	1.02	1.073	1.133
									0.877	1.025	1.105	1.091	0.605	0.983	1.04	1.088	1.057	1.17	1.149	1.156	1.095	1.068	1.046	0.86	1.074	1.069	1.064	0.966	1.137	1.083	0.882	0.758	1.026	1.026	1.036	1.044	0.907	1.068	1.052	1.045	1.075	1.052	1.008	1.081	0.992	1.051	1.019	1.072	1.132
									0.878	1.026	1.105	1.092	0.605	0.983	1.042	1.087	1.052	1.17	1.148	1.156	1.095	1.068	1.045	0.86	1.076	1.07	1.064	0.966	1.137	1.082	0.883	0.756	1.026	1.026	1.035	1.045	0.907	1.067	1.053	1.045	1.077	1.051	1.007	1.081	0.993	1.052	1.017	1.072	1.133
									0.875	1.027	1.105	1.091	0.605	0.982	1.043	1.087	1.046	1.169	1.147	1.156	1.096	1.067	1.045	0.859	1.077	1.072	1.065	0.967	1.14	1.083	0.885	0.756	1.025	1.025	1.035	1.044	0.907	1.067	1.054	1.044	1.077	1.053	1.007	1.082	0.992	1.053	1.016	1.073	1.133
									0.876	1.028	1.104	1.091	0.605	0.981	1.045	1.088	1.042	1.169	1.145	1.155	1.096	1.068	1.045	0.856	1.078	1.075	1.067	0.967	1.141	1.084	0.886	0.755	1.026	1.025	1.036	1.044	0.907	1.065	1.054	1.042	1.077	1.053	1.006	1.08	0.993	1.05	1.016	1.071	1.131
								8	0.874	1.029	1.101	1.09	0.605	0.983	1.044	1.089	1.039	1.169	1.143	1.154	1.097	1.068	1.044	0.856	1.081	1.076	1.069	0.967	1.142	1.085	0.888	0.756	1.025	1.027	1.039	1.042	0.907	1.062	1.056	1.04	1.077	1.052	1.007	1.081	0.993	1.049	1.017	1.074	1.132
									0.876	1.027	1.099	1.09	0.605	0.984	1.043	1.09	1.039	1.168	1.142	1.154	1.097	1.069	1.045	0.856	1.081	1.077	1.071	0.968	1.143	1.086	0.891	0.755	1.026	1.026	1.039	1.044	0.907	1.059	1.057	1.041	1.078	1.053	1.008	1.083	0.99	1.049	1.017	1.076	1.132
									0.875	1.026	1.095	1.088	0.605	0.983	1.043	1.088	1.037	1.169	1.141	1.154	1.097	1.069	1.045	0.859	1.082	1.078	1.071	0.969	1.144	1.088	0.892	0.756	1.025	1.026	1.041	1.042	0.907	1.059	1.056	1.042	1.079	1.051	1.01	1.083	0.989	1.048	1.015	1.08	1.131
									0.875	1.025	1.095	1.086	0.605	0.983	1.044	1.09	1.035	1.168	1.142	1.155	1.098	1.069	1.044	0.864	1.085	1.078	1.071	0.969	1.144	1.089	0.893	0.756	1.032	1.026	1.043	1.043	0.907	1.06	1.058	1.041	1.079	1.05	1.01	1.084	0.991	1.049	1.015	1.082	1.132
									0.879	1.03	1.106	1.09	0.604	0.981	1.045	1.091	1.032	1.167	1.142	1.157	1.104	1.078	1.047	0.869	1.085	1.081	1.072	0.97	1.146	1.089	0.896	0.756	1.03	1.031	1.054	1.053	0.907	1.061	1.059	1.041	1.08	1.049	1.009	1.083	0.991	1.058	1.015	1.083	1.132
									0.877	1.027	1.1	1.083	0.604	0.979	1.044	1.092	1.032	1.167	1.141	1.155	1.101	1.07	1.046	0.862	1.087	1.081	1.071	0.969	1.146	1.089	0.898	0.755	1.028	1.026	1.047	1.043	0.909	1.061	1.059	1.041	1.08	1.052	1.01	1.082	0.991	1.049	1.016	1.084	1.132
									0.88	1.028	1.1	1.083	0.603	0.977	1.045	1.093	1.031	1.166	1.141	1.155	1.103	1.07	1.045	0.863	1.086	1.083	1.072	0.968	1.147	1.088	0.901	0.753	1.028	1.024	1.044	1.038	0.909	1.062	1.062	1.042	1.082	1.053	1.011	1.083	0.993	1.048	1.015	1.084	1.129
									0.88	1.029	1.1	1.082	0.603	0.977	1.043	1.095	1.03	1.166	1.141	1.155	1.104	1.07	1.044	0.862	1.086	1.085	1.072	0.969	1.147	1.087	0.904	0.753	1.033	1.028	1.044	1.037	0.91	1.062	1.062	1.043	1.083	1.055	1.012	1.082	0.995	1.052	1.016	1.083	1.13
									0.882	1.029	1.101	1.083	0.602	0.976	1.044	1.097	1.03	1.167	1.141	1.157	1.107	1.072	1.044	0.865	1.088	1.086	1.072	0.969	1.148	1.086	0.906	0.753	1.027	1.026	1.038	1.037	0.907	1.063	1.061	1.044	1.083	1.058	1.013	1.079	0.998	1.045	1.019	1.085	1.13
									0.883	1.026	1.099	1.084	0.602	0.975	1.042	1.097	1.03	1.166	1.14	1.157	1.107	1.071	1.045	0.866	1.09	1.086	1.073	0.97	1.146	1.088	0.908	0.753	1.031	1.03	1.041	1.039	0.906	1.062	1.062	1.043	1.082	1.057	1.014	1.079	0.998	1.04	1.019	1.083	1.126
									0.886	1.029	1.1	1.089	0.602	0.973	1.043	1.099	1.03	1.163	1.137	1.158	1.112	1.072	1.049	0.87	1.09	1.083	1.074	0.968	1.148	1.088	0.912	0.753	1.031	1.03	1.049	1.051	0.906	1.065	1.064	1.043	1.081	1.058	1.014	1.08	1.009	1.041	1.02	1.085	1.127
									0.885	1.024	1.098	1.085	0.603	0.975	1.042	1.1	1.029	1.158	1.135	1.158	1.107	1.071	1.046	0.869	1.092	1.085	1.075	0.967	1.148	1.088	0.913	0.751	1.024	1.026	1.044	1.04	0.905	1.066	1.065	1.043	1.081	1.057	1.011	1.08	1	1.034	1.021	1.087	1.125
									0.889	1.03	1.101	1.087	0.603	0.975	1.041	1.1	1.028	1.157	1.134	1.16	1.11	1.076	1.05	0.87	1.093	1.086	1.074	0.967	1.15	1.086	0.916	0.75	1.023	1.028	1.048	1.043	0.906	1.066	1.066	1.044	1.08	1.056	1.009	1.078	1.004	1.036	1.02	1.088	1.125
									0.892	1.029	1.104	1.088	0.603	0.974	1.041	1.1	1.029	1.157	1.134	1.16	1.11	1.072	1.051	0.879	1.093	1.086	1.074	0.967	1.151	1.086	0.917	0.75	1.032	1.04	1.055	1.047	0.905	1.067	1.067	1.046	1.075	1.056	1.009	1.077	1.01	1.037	1.02	1.09	1.124
									0.882	1.026	1.101	1.082	0.602	0.975	1.041	1.103	1.027	1.157	1.133	1.159	1.106	1.072	1.047	0.873	1.092	1.087	1.075	0.967	1.152	1.087	0.919	0.75	1.024	1.025	1.049	1.047	0.906	1.069	1.068	1.047	1.074	1.055	1.009	1.077	1.008	1.036	1.019	1.091	1.125
									0.882	1.026	1.102	1.082	0.603	0.976	1.04	1.103	1.024	1.156	1.133	1.158	1.107	1.072	1.046	0.872	1.095	1.09	1.076	0.967	1.153	1.088	0.922	0.751	1.024	1.023	1.048	1.045	0.907	1.07	1.068	1.047	1.073	1.053	1.008	1.078	1.01	1.034	1.018	1.092	1.124
									0.883	1.025	1.103	1.082	0.603	0.978	1.04	1.102	1.021	1.155	1.134	1.157	1.107	1.071	1.045	0.872	1.093	1.092	1.077	0.967	1.153	1.087	0.921	0.751	1.027	1.024	1.053	1.044	0.905	1.07	1.069	1.047	1.073	1.054	1.008	1.079	1.013	1.032	1.019	1.095	1.125
									0.881	1.026	1.104	1.081	0.603	0.981	1.041	1.102	1.021	1.153	1.131	1.158	1.109	1.071	1.045	0.872	1.095	1.093	1.078	0.969	1.153	1.086	0.922	0.75	1.028	1.026	1.052	1.049	0.906	1.07	1.072	1.047	1.075	1.055	1.007	1.083	1.013	1.032	1.019	1.096	1.123
									0.882	1.026	1.106	1.083	0.602	0.982	1.042	1.103	1.019	1.151	1.13	1.156	1.108	1.07	1.044	0.872	1.097	1.095	1.078	0.969	1.154	1.084	0.923	0.75	1.024	1.022	1.048	1.046	0.906	1.07	1.073	1.048	1.073	1.057	1.008	1.082	1.014	1.03	1.018	1.097	1.121
									0.883	1.026	1.106	1.085	0.602	0.983	1.043	1.105	1.019	1.151	1.127	1.157	1.108	1.07	1.045	0.872	1.098	1.098	1.078	0.971	1.154	1.084	0.923	0.751	1.022	1.025	1.049	1.046	0.905	1.071	1.075	1.048	1.073	1.058	1.009	1.082	1.015	1.032	1.017	1.098	1.121
									0.88	1.025	1.107	1.086	0.602	0.982	1.042	1.106	1.019	1.148	1.123	1.156	1.109	1.069	1.046	0.872	1.099	1.097	1.078	0.971	1.155	1.086	0.924	0.751	1.02	1.027	1.049	1.044	0.905	1.07	1.076	1.048	1.076	1.059	1.01	1.081	1.018	1.033	1.02	1.098	1.121
									0.882	1.026	1.107	1.086	0.601	0.984	1.042	1.108	1.019	1.149	1.119	1.154	1.109	1.068	1.046	0.871	1.1	1.097	1.077	0.971	1.155	1.088	0.923	0.752	1.019	1.027	1.052	1.039	0.905	1.071	1.077	1.046	1.076	1.059	1.01	1.081	1.018	1.035	1.021	1.096	1.12
									0.882	1.025	1.106	1.087	0.6	0.983	1.041	1.11	1.017	1.149	1.119	1.153	1.112	1.068	1.045	0.874	1.102	1.097	1.078	0.973	1.155	1.089	0.924	0.751	1.017	1.027	1.052	1.039	0.904	1.072	1.076	1.046	1.077	1.058	1.012	1.082	1.023	1.032	1.021	1.093	1.117
									0.881	1.025	1.102	1.088	0.599	0.985	1.04	1.112	1.014	1.147	1.119	1.155	1.112	1.069	1.044	0.875	1.104	1.097	1.079	0.975	1.156	1.091	0.926	0.751	1.016	1.029	1.054	1.038	0.901	1.073	1.077	1.047	1.076	1.058	1.012	1.083	1.023	1.03	1.02	1.091	1.116
									0.882	1.026	1.102	1.088	0.597	0.986	1.04	1.113	1.011	1.148	1.116	1.154	1.112	1.067	1.044	0.878	1.105	1.098	1.081	0.973	1.158	1.092	0.928	0.752	1.016	1.03	1.052	1.039	0.9	1.073	1.077	1.046	1.076	1.059	1.013	1.083	1.023	1.028	1.019	1.093	1.114
									0.881	1.027	1.099	1.09	0.597	0.986	1.04	1.113	1.009	1.149	1.116	1.154	1.112	1.067	1.044	0.877	1.105	1.1	1.081	0.974	1.159	1.093	0.931	0.754	1.017	1.029	1.052	1.039	0.9	1.074	1.076	1.046	1.075	1.058	1.012	1.084	1.024	1.029	1.018	1.092	1.115
									0.881	1.029	1.096	1.09	0.596	0.985	1.04	1.114	1.007	1.145	1.115	1.155	1.112	1.066	1.044	0.877	1.106	1.101	1.082	0.975	1.159	1.093	0.933	0.755	1.017	1.029	1.052	1.035	0.899	1.073	1.077	1.046	1.075	1.06	1.011	1.083	1.027	1.029	1.016	1.093	1.114
									0.881	1.03	1.096	1.089	0.596	0.985	1.04	1.115	1.006	1.145	1.113	1.153	1.112	1.065	1.045	0.878	1.106	1.1	1.084	0.974	1.16	1.093	0.935	0.756	1.02	1.03	1.051	1.033	0.897	1.073	1.075	1.046	1.075	1.059	1.011	1.083	1.025	1.027	1.015	1.093	1.113
									0.878	1.03	1.096	1.085	0.595	0.982	1.038	1.117	1.003	1.143	1.111	1.152	1.11	1.066	1.045	0.88	1.108	1.102	1.084	0.973	1.16	1.093	0.936	0.757	1.018	1.032	1.049	1.034	0.898	1.071	1.073	1.046	1.074	1.06	1.011	1.084	1.027	1.026	1.016	1.094	1.111
									0.879	1.029	1.096	1.086	0.594	0.982	1.038	1.118	1.003	1.142	1.109	1.151	1.11	1.066	1.046	0.881	1.109	1.104	1.083	0.973	1.16	1.092	0.937	0.757	1.019	1.032	1.05	1.033	0.897	1.07	1.073	1.047	1.075	1.057	1.011	1.085	1.027	1.025	1.017	1.095	1.11
								9	0.879	1.029	1.095	1.086	0.592	0.982	1.037	1.12	1.004	1.141	1.108	1.151	1.111	1.065	1.046	0.883	1.108	1.104	1.083	0.972	1.16	1.092	0.938	0.756	1.018	1.032	1.052	1.034	0.897	1.071	1.073	1.048	1.077	1.057	1.012	1.088	1.027	1.022	1.019	1.098	1.108
									0.877	1.03	1.095	1.085	0.591	0.981	1.037	1.12	1.004	1.139	1.108	1.151	1.112	1.064	1.047	0.885	1.11	1.105	1.083	0.973	1.158	1.09	0.94	0.757	1.017	1.032	1.054	1.035	0.898	1.071	1.074	1.049	1.077	1.057	1.013	1.09	1.027	1.021	1.019	1.098	1.107
									0.876	1.029	1.097	1.086	0.59	0.98	1.037	1.119	1.003	1.139	1.109	1.153	1.113	1.063	1.048	0.887	1.111	1.105	1.084	0.972	1.159	1.089	0.941	0.757	1.017	1.031	1.054	1.035	0.897	1.068	1.076	1.05	1.078	1.057	1.014	1.089	1.027	1.022	1.019	1.099	1.107
									0.876	1.029	1.1	1.088	0.59	0.979	1.036	1.117	1	1.139	1.107	1.154	1.112	1.062	1.047	0.886	1.111	1.104	1.082	0.973	1.159	1.088	0.943	0.757	1.016	1.032	1.058	1.035	0.895	1.067	1.079	1.05	1.076	1.058	1.015	1.089	1.03	1.02	1.018	1.097	1.104
									0.875	1.028	1.1	1.087	0.589	0.976	1.037	1.115	1.001	1.139	1.105	1.153	1.112	1.062	1.048	0.888	1.113	1.107	1.082	0.975	1.158	1.088	0.946	0.758	1.016	1.03	1.058	1.035	0.895	1.069	1.078	1.051	1.075	1.057	1.01	1.089	1.032	1.02	1.017	1.098	1.101
									0.876	1.024	1.1	1.085	0.588	0.975	1.037	1.114	0.999	1.137	1.104	1.153	1.113	1.063	1.047	0.887	1.113	1.107	1.081	0.975	1.159	1.09	0.948	0.758	1.016	1.031	1.062	1.035	0.896	1.07	1.074	1.053	1.075	1.059	1.009	1.087	1.037	1.018	1.016	1.1	1.099
									0.876	1.023	1.099	1.086	0.586	0.975	1.037	1.114	0.997	1.137	1.103	1.151	1.11	1.064	1.046	0.886	1.112	1.108	1.081	0.976	1.159	1.091	0.949	0.758	1.018	1.033	1.063	1.036	0.897	1.071	1.073	1.052	1.076	1.057	1.01	1.089	1.038	1.017	1.017	1.102	1.098
									0.877	1.024	1.098	1.086	0.585	0.976	1.038	1.115	0.995	1.137	1.102	1.148	1.11	1.066	1.045	0.886	1.112	1.11	1.081	0.976	1.161	1.091	0.951	0.758	1.019	1.032	1.064	1.036	0.896	1.072	1.072	1.053	1.075	1.058	1.01	1.09	1.038	1.013	1.017	1.102	1.096
									0.875	1.024	1.098	1.086	0.584	0.978	1.04	1.116	0.996	1.135	1.099	1.147	1.106	1.067	1.045	0.89	1.11	1.11	1.082	0.98	1.162	1.092	0.954	0.758	1.019	1.035	1.064	1.034	0.895	1.073	1.073	1.054	1.074	1.056	1.01	1.09	1.039	1.01	1.016	1.101	1.096
									0.877	1.023	1.095	1.087	0.583	0.977	1.042	1.116	0.997	1.129	1.096	1.147	1.104	1.066	1.046	0.891	1.113	1.111	1.082	0.981	1.162	1.092	0.954	0.758	1.021	1.034	1.064	1.034	0.897	1.074	1.075	1.056	1.074	1.057	1.01	1.089	1.04	1.01	1.018	1.102	1.096
									0.876	1.007	1.095	1.087	0.582	0.978	1.042	1.117	0.996	1.125	1.095	1.146	1.104	1.065	1.046	0.889	1.112	1.112	1.083	0.982	1.162	1.09	0.956	0.76	1.02	1.033	1.065	1.036	0.899	1.074	1.079	1.056	1.075	1.057	1.008	1.086	1.039	1.01	1.017	1.103	1.094
									0.875	1.008	1.091	1.087	0.58	0.976	1.042	1.117	0.996	1.122	1.091	1.146	1.103	1.064	1.045	0.887	1.113	1.112	1.085	0.982	1.162	1.09	0.957	0.76	1.023	1.033	1.065	1.034	0.899	1.074	1.081	1.055	1.076	1.055	1.006	1.086	1.039	1.011	1.018	1.103	1.093
									0.873	1.008	1.092	1.086	0.578	0.975	1.042	1.117	0.994	1.12	1.089	1.145	1.101	1.065	1.045	0.887	1.114	1.114	1.087	0.983	1.161	1.088	0.96	0.759	1.023	1.03	1.066	1.035	0.897	1.072	1.082	1.055	1.077	1.055	1.007	1.084	1.04	1.014	1.019	1.104	1.092
									0.873	1.006	1.095	1.085	0.577	0.975	1.043	1.117	0.993	1.116	1.088	1.146	1.1	1.065	1.045	0.888	1.116	1.114	1.087	0.983	1.163	1.085	0.962	0.757	1.023	1.029	1.063	1.036	0.895	1.071	1.081	1.057	1.077	1.054	1.008	1.083	1.041	1.012	1.02	1.105	1.089
									0.872	1.001	1.095	1.083	0.576	0.975	1.042	1.118	0.991	1.114	1.088	1.146	1.099	1.067	1.044	0.89	1.118	1.116	1.086	0.983	1.16	1.085	0.964	0.756	1.024	1.03	1.062	1.036	0.897	1.072	1.081	1.058	1.077	1.053	1.009	1.082	1.044	1.012	1.021	1.105	1.087
									0.869	1	1.096	1.08	0.575	0.975	1.042	1.117	0.99	1.111	1.088	1.146	1.099	1.068	1.043	0.891	1.118	1.117	1.086	0.982	1.159	1.084	0.965	0.754	1.023	1.03	1.063	1.038	0.896	1.073	1.081	1.058	1.076	1.053	1.011	1.085	1.047	1.012	1.021	1.104	1.09
									0.87	1.001	1.095	1.079	0.573	0.975	1.043	1.116	0.99	1.113	1.088	1.145	1.1	1.067	1.042	0.895	1.12	1.118	1.085	0.982	1.157	1.086	0.966	0.754	1.023	1.03	1.062	1.039	0.897	1.074	1.08	1.059	1.076	1.054	1.01	1.084	1.048	1.011	1.021	1.105	1.089
									0.873	1.003	1.095	1.081	0.573	0.973	1.042	1.116	0.989	1.115	1.09	1.144	1.1	1.07	1.042	0.898	1.119	1.118	1.085	0.983	1.157	1.086	0.966	0.752	1.022	1.031	1.065	1.039	0.899	1.074	1.076	1.057	1.074	1.054	1.011	1.085	1.049	1.011	1.018	1.106	1.087
									0.873	1.003	1.095	1.079	0.572	0.97	1.042	1.114	0.989	1.116	1.089	1.14	1.098	1.068	1.044	0.901	1.119	1.119	1.084	0.981	1.156	1.085	0.966	0.751	1.021	1.03	1.064	1.038	0.9	1.076	1.069	1.059	1.073	1.054	1.01	1.084	1.05	1.01	1.018	1.106	1.086
									0.877	1.007	1.094	1.077	0.571	0.969	1.041	1.114	0.988	1.114	1.085	1.139	1.098	1.067	1.045	0.903	1.121	1.12	1.084	0.982	1.156	1.085	0.967	0.749	1.02	1.03	1.066	1.039	0.9	1.074	1.069	1.059	1.074	1.055	1.01	1.085	1.05	1.01	1.017	1.106	1.084
									0.879	1.009	1.097	1.077	0.572	0.969	1.039	1.112	0.987	1.112	1.082	1.14	1.099	1.07	1.048	0.903	1.123	1.121	1.083	0.982	1.157	1.083	0.969	0.747	1.025	1.039	1.076	1.041	0.9	1.073	1.067	1.061	1.075	1.055	1.009	1.086	1.054	1.011	1.015	1.107	1.085
									0.88	1.01	1.098	1.071	0.572	0.968	1.038	1.112	0.987	1.111	1.084	1.141	1.1	1.066	1.044	0.902	1.125	1.122	1.082	0.981	1.155	1.083	0.974	0.747	1.028	1.039	1.072	1.047	0.899	1.072	1.067	1.061	1.074	1.054	1.009	1.086	1.059	1.018	1.014	1.109	1.083
									0.879	1.012	1.1	1.07	0.571	0.97	1.039	1.112	0.987	1.111	1.084	1.14	1.097	1.066	1.044	0.901	1.128	1.123	1.083	0.98	1.154	1.083	0.978	0.746	1.021	1.029	1.073	1.044	0.899	1.071	1.069	1.062	1.075	1.055	1.009	1.086	1.055	1.007	1.014	1.112	1.085
									0.882	1.011	1.101	1.069	0.57	0.97	1.04	1.113	0.987	1.105	1.085	1.139	1.103	1.072	1.044	0.901	1.128	1.123	1.084	0.978	1.154	1.084	0.981	0.746	1.021	1.029	1.069	1.045	0.897	1.071	1.071	1.061	1.076	1.056	1.009	1.087	1.058	1.007	1.013	1.112	1.082
									0.885	1.017	1.111	1.067	0.569	0.97	1.039	1.113	0.986	1.101	1.088	1.138	1.097	1.064	1.044	0.906	1.128	1.124	1.083	0.975	1.156	1.084	0.984	0.745	1.019	1.028	1.068	1.044	0.897	1.072	1.073	1.06	1.074	1.055	1.009	1.087	1.059	1.004	1.012	1.114	1.081
									0.882	1.013	1.1	1.065	0.569	0.969	1.037	1.115	0.984	1.097	1.091	1.137	1.095	1.064	1.044	0.902	1.127	1.126	1.083	0.976	1.154	1.083	0.987	0.744	1.02	1.029	1.068	1.044	0.896	1.07	1.073	1.06	1.072	1.053	1.008	1.087	1.058	1.003	1.012	1.116	1.079
									0.883	1.012	1.098	1.064	0.569	0.968	1.034	1.114	0.984	1.093	1.092	1.136	1.093	1.063	1.045	0.903	1.127	1.125	1.082	0.977	1.153	1.083	0.99	0.742	1.02	1.031	1.065	1.043	0.895	1.07	1.072	1.06	1.072	1.053	1.01	1.087	1.061	1.003	1.013	1.116	1.077
									0.883	1.013	1.098	1.064	0.569	0.966	1.035	1.114	0.986	1.094	1.094	1.136	1.092	1.065	1.046	0.905	1.127	1.125	1.083	0.977	1.152	1.082	0.992	0.741	1.022	1.032	1.066	1.041	0.894	1.069	1.072	1.061	1.07	1.052	1.01	1.083	1.066	1.004	1.012	1.117	1.075
									0.886	1.014	1.096	1.063	0.569	0.965	1.036	1.112	0.987	1.095	1.096	1.135	1.091	1.065	1.045	0.906	1.127	1.123	1.084	0.977	1.153	1.081	0.996	0.741	1.022	1.032	1.067	1.042	0.892	1.07	1.071	1.062	1.069	1.052	1.01	1.083	1.069	1.005	1.013	1.118	1.072
									0.883	1.016	1.095	1.066	0.568	0.965	1.035	1.112	0.989	1.094	1.096	1.133	1.092	1.066	1.046	0.907	1.125	1.123	1.086	0.979	1.15	1.08	0.997	0.739	1.022	1.032	1.074	1.041	0.891	1.071	1.073	1.064	1.068	1.049	1.011	1.082	1.073	1.003	1.014	1.116	1.07
								10	0.883	1.016	1.094	1.066	0.567	0.962	1.036	1.112	0.989	1.096	1.097	1.132	1.092	1.069	1.046	0.907	1.125	1.122	1.086	0.979	1.148	1.079	0.999	0.737	1.022	1.033	1.071	1.04	0.893	1.07	1.073	1.063	1.068	1.047	1.01	1.082	1.074	1.001	1.014	1.116	1.07
									0.883	1.018	1.092	1.067	0.566	0.961	1.036	1.113	0.989	1.098	1.096	1.132	1.093	1.069	1.045	0.907	1.125	1.121	1.085	0.98	1.146	1.078	0.999	0.736	1.021	1.031	1.072	1.041	0.893	1.071	1.072	1.064	1.068	1.049	1.012	1.085	1.074	1	1.015	1.116	1.068
									0.88	1.018	1.094	1.066	0.565	0.959	1.035	1.113	0.987	1.102	1.096	1.131	1.092	1.067	1.045	0.907	1.125	1.12	1.085	0.983	1.146	1.079	0.999	0.736	1.021	1.032	1.072	1.039	0.892	1.072	1.071	1.064	1.068	1.048	1.011	1.084	1.078	1	1.015	1.114	1.069
									0.88	1.019	1.094	1.069	0.566	0.96	1.037	1.114	0.987	1.103	1.096	1.129	1.091	1.068	1.046	0.909	1.126	1.12	1.084	0.984	1.145	1.078	1	0.736	1.023	1.033	1.073	1.036	0.894	1.073	1.07	1.064	1.068	1.047	1.01	1.082	1.08	1	1.016	1.115	1.065
									0.883	1.018	1.092	1.069	0.566	0.959	1.038	1.114	0.986	1.106	1.094	1.128	1.093	1.067	1.045	0.91	1.127	1.122	1.084	0.984	1.142	1.076	1	0.735	1.023	1.032	1.07	1.037	0.893	1.074	1.07	1.064	1.067	1.046	1.009	1.082	1.079	0.999	1.018	1.117	1.063
									0.883	1.018	1.092	1.069	0.566	0.959	1.038	1.117	0.984	1.106	1.094	1.129	1.092	1.069	1.046	0.91	1.126	1.123	1.085	0.985	1.14	1.075	1.002	0.735	1.022	1.033	1.07	1.036	0.893	1.074	1.072	1.065	1.066	1.047	1.009	1.08	1.082	0.997	1.019	1.117	1.061
									0.888	1.015	1.092	1.07	0.566	0.96	1.039	1.119	0.982	1.108	1.094	1.129	1.09	1.069	1.044	0.912	1.128	1.123	1.085	0.985	1.142	1.074	1.004	0.735	1.02	1.033	1.067	1.035	0.891	1.075	1.073	1.066	1.067	1.047	1.009	1.077	1.083	0.996	1.021	1.118	1.06
									0.884	1.015	1.092	1.07	0.565	0.96	1.038	1.118	0.981	1.109	1.096	1.129	1.088	1.069	1.043	0.912	1.128	1.124	1.084	0.985	1.141	1.073	1.008	0.736	1.018	1.031	1.066	1.033	0.893	1.075	1.074	1.067	1.067	1.044	1.008	1.075	1.084	0.998	1.021	1.119	1.058
									0.882	1.014	1.089	1.068	0.564	0.957	1.036	1.116	0.979	1.109	1.097	1.127	1.089	1.069	1.042	0.915	1.128	1.124	1.083	0.985	1.142	1.072	1.011	0.736	1.019	1.032	1.065	1.031	0.895	1.075	1.074	1.068	1.067	1.042	1.007	1.078	1.087	0.998	1.021	1.119	1.058
									0.881	1.016	1.088	1.066	0.564	0.954	1.037	1.117	0.975	1.109	1.096	1.125	1.088	1.069	1.041	0.916	1.128	1.123	1.083	0.986	1.141	1.071	1.013	0.737	1.02	1.032	1.068	1.032	0.896	1.075	1.073	1.066	1.067	1.041	1.008	1.079	1.088	0.998	1.02	1.119	1.059
									0.881	1.017	1.089	1.066	0.564	0.95	1.038	1.116	0.973	1.108	1.094	1.125	1.088	1.069	1.041	0.917	1.128	1.122	1.083	0.985	1.141	1.071	1.016	0.738	1.02	1.034	1.069	1.031	0.897	1.074	1.072	1.066	1.067	1.039	1.007	1.082	1.09	0.998	1.02	1.122	1.058
									0.881	1.018	1.091	1.067	0.564	0.949	1.036	1.114	0.972	1.107	1.095	1.124	1.087	1.067	1.043	0.916	1.129	1.121	1.082	0.983	1.139	1.07	1.018	0.736	1.02	1.034	1.07	1.033	0.897	1.076	1.071	1.067	1.067	1.04	1.005	1.079	1.092	0.999	1.019	1.124	1.055
									0.884	1.015	1.091	1.07	0.563	0.946	1.035	1.112	0.973	1.106	1.096	1.124	1.086	1.07	1.046	0.916	1.129	1.122	1.081	0.983	1.138	1.069	1.02	0.735	1.02	1.038	1.073	1.037	0.899	1.075	1.07	1.066	1.067	1.039	1.004	1.08	1.092	0.999	1.019	1.125	1.053
									0.884	1.016	1.091	1.071	0.562	0.946	1.035	1.111	0.974	1.106	1.097	1.123	1.083	1.069	1.042	0.916	1.129	1.122	1.081	0.983	1.137	1.071	1.021	0.734	1.02	1.034	1.079	1.034	0.9	1.075	1.069	1.067	1.068	1.038	1.002	1.078	1.093	1	1.019	1.126	1.053
									0.884	1.018	1.093	1.073	0.563	0.944	1.036	1.11	0.976	1.106	1.097	1.122	1.085	1.067	1.043	0.916	1.13	1.121	1.081	0.984	1.136	1.071	1.024	0.735	1.02	1.034	1.075	1.035	0.902	1.075	1.069	1.068	1.068	1.037	1.003	1.079	1.097	1.001	1.019	1.125	1.05
									0.883	1.019	1.093	1.072	0.563	0.943	1.038	1.109	0.976	1.107	1.096	1.121	1.084	1.068	1.041	0.917	1.131	1.12	1.082	0.985	1.133	1.071	1.026	0.734	1.018	1.034	1.078	1.033	0.903	1.077	1.069	1.067	1.068	1.038	1.002	1.078	1.099	1	1.02	1.125	1.048
									0.882	1.02	1.093	1.074	0.563	0.941	1.038	1.108	0.977	1.106	1.094	1.121	1.084	1.068	1.041	0.919	1.131	1.12	1.082	0.986	1.132	1.07	1.029	0.734	1.015	1.036	1.078	1.031	0.903	1.077	1.069	1.067	1.067	1.036	1	1.077	1.1	1	1.021	1.126	1.047
									0.883	1.021	1.094	1.074	0.562	0.939	1.039	1.107	0.977	1.106	1.095	1.119	1.082	1.069	1.041	0.921	1.132	1.122	1.08	0.987	1.132	1.07	1.03	0.735	1.016	1.034	1.077	1.03	0.904	1.079	1.07	1.067	1.064	1.037	1	1.075	1.103	1	1.022	1.129	1.048
									0.882	1.021	1.096	1.074	0.561	0.938	1.039	1.106	0.978	1.106	1.095	1.117	1.078	1.067	1.041	0.923	1.132	1.122	1.081	0.988	1.13	1.069	1.031	0.737	1.016	1.033	1.078	1.031	0.906	1.08	1.071	1.065	1.063	1.037	0.998	1.077	1.106	1	1.023	1.132	1.046
									0.881	1.02	1.098	1.076	0.561	0.938	1.039	1.105	0.979	1.106	1.095	1.117	1.078	1.069	1.042	0.923	1.13	1.123	1.081	0.988	1.129	1.067	1.031	0.737	1.017	1.034	1.073	1.029	0.906	1.078	1.072	1.063	1.063	1.036	0.995	1.076	1.108	1	1.023	1.132	1.047
									0.881	1.019	1.097	1.077	0.56	0.936	1.038	1.104	0.979	1.102	1.095	1.116	1.078	1.067	1.042	0.924	1.131	1.123	1.08	0.989	1.128	1.068	1.034	0.737	1.015	1.032	1.073	1.029	0.908	1.078	1.072	1.061	1.061	1.035	0.997	1.077	1.109	1.001	1.023	1.132	1.045
									0.884	1.019	1.099	1.078	0.559	0.937	1.036	1.104	0.978	1.1	1.095	1.118	1.077	1.066	1.044	0.926	1.131	1.123	1.08	0.99	1.125	1.068	1.035	0.739	1.015	1.031	1.073	1.031	0.908	1.077	1.073	1.06	1.061	1.032	0.997	1.077	1.11	0.998	1.026	1.134	1.047
									0.883	1.017	1.098	1.078	0.56	0.936	1.035	1.104	0.977	1.1	1.093	1.115	1.077	1.065	1.043	0.927	1.132	1.122	1.079	0.991	1.125	1.069	1.039	0.739	1.012	1.031	1.073	1.029	0.909	1.078	1.071	1.061	1.06	1.032	0.995	1.079	1.114	0.996	1.025	1.136	1.045
									0.885	1.015	1.098	1.077	0.56	0.935	1.035	1.105	0.978	1.101	1.093	1.113	1.074	1.064	1.042	0.928	1.132	1.123	1.08	0.99	1.125	1.066	1.039	0.737	1.013	1.031	1.075	1.03	0.911	1.078	1.072	1.063	1.061	1.03	0.994	1.081	1.113	0.996	1.025	1.139	1.042
									0.885	1.015	1.097	1.078	0.561	0.934	1.036	1.106	0.977	1.102	1.093	1.112	1.074	1.063	1.042	0.927	1.131	1.123	1.08	0.992	1.123	1.065	1.04	0.738	1.013	1.03	1.074	1.03	0.911	1.081	1.073	1.067	1.06	1.028	0.995	1.079	1.113	0.994	1.024	1.142	1.043
									0.885	1.015	1.095	1.077	0.56	0.936	1.035	1.106	0.976	1.104	1.09	1.111	1.074	1.063	1.042	0.926	1.132	1.123	1.079	0.992	1.122	1.064	1.039	0.738	1.013	1.027	1.073	1.03	0.913	1.079	1.074	1.067	1.06	1.026	0.993	1.078	1.117	0.994	1.024	1.143	1.04
									0.882	1.017	1.098	1.075	0.56	0.937	1.034	1.104	0.976	1.105	1.09	1.11	1.074	1.061	1.043	0.927	1.132	1.121	1.078	0.992	1.12	1.063	1.041	0.741	1.014	1.027	1.072	1.031	0.912	1.079	1.073	1.069	1.059	1.024	0.993	1.078	1.12	0.995	1.024	1.143	1.04
									0.882	1.017	1.098	1.074	0.561	0.934	1.032	1.103	0.976	1.105	1.091	1.11	1.071	1.061	1.044	0.928	1.133	1.121	1.079	0.993	1.117	1.063	1.042	0.741	1.015	1.027	1.072	1.031	0.911	1.079	1.074	1.068	1.059	1.023	0.991	1.076	1.122	0.994	1.025	1.144	1.04
									0.878	1.019	1.094	1.073	0.561	0.934	1.033	1.101	0.976	1.104	1.09	1.109	1.069	1.062	1.045	0.928	1.132	1.122	1.078	0.993	1.116	1.061	1.043	0.741	1.014	1.027	1.07	1.029	0.911	1.079	1.073	1.071	1.059	1.022	0.99	1.077	1.124	0.99	1.024	1.145	1.04
									0.878	1.022	1.092	1.075	0.56	0.932	1.032	1.1	0.977	1.103	1.091	1.106	1.069	1.061	1.044	0.93	1.132	1.123	1.077	0.994	1.116	1.059	1.043	0.742	1.016	1.026	1.068	1.03	0.911	1.079	1.072	1.072	1.057	1.022	0.99	1.074	1.127	0.99	1.025	1.148	1.035
								11	0.876	1.022	1.092	1.075	0.56	0.93	1.033	1.097	0.978	1.102	1.091	1.106	1.066	1.062	1.045	0.932	1.132	1.123	1.077	0.996	1.113	1.057	1.044	0.742	1.017	1.026	1.069	1.029	0.913	1.077	1.07	1.072	1.059	1.022	0.989	1.074	1.127	0.99	1.026	1.151	1.034
									0.878	1.024	1.091	1.075	0.561	0.928	1.032	1.096	0.979	1.102	1.094	1.104	1.066	1.06	1.046	0.933	1.132	1.123	1.076	0.997	1.113	1.055	1.045	0.743	1.016	1.027	1.067	1.029	0.912	1.079	1.071	1.072	1.057	1.02	0.989	1.071	1.128	0.988	1.027	1.153	1.033
									0.879	1.025	1.092	1.076	0.561	0.928	1.03	1.094	0.98	1.103	1.095	1.102	1.067	1.061	1.046	0.934	1.132	1.124	1.075	0.997	1.111	1.052	1.046	0.742	1.017	1.027	1.066	1.028	0.911	1.078	1.07	1.072	1.058	1.014	0.988	1.068	1.129	0.988	1.026	1.155	1.031
									0.879	1.025	1.091	1.077	0.561	0.927	1.027	1.09	0.982	1.104	1.095	1.102	1.066	1.059	1.047	0.934	1.13	1.124	1.074	0.998	1.111	1.05	1.048	0.743	1.017	1.028	1.067	1.028	0.912	1.079	1.069	1.074	1.058	1.014	0.988	1.068	1.13	0.988	1.026	1.157	1.03
									0.878	1.024	1.089	1.078	0.562	0.926	1.026	1.089	0.981	1.104	1.096	1.101	1.067	1.057	1.047	0.935	1.129	1.124	1.074	0.997	1.108	1.048	1.052	0.744	1.017	1.029	1.069	1.028	0.91	1.079	1.069	1.075	1.058	1.011	0.988	1.068	1.132	0.989	1.027	1.158	1.029
									0.88	1.027	1.087	1.081	0.562	0.927	1.025	1.09	0.979	1.105	1.096	1.099	1.066	1.058	1.051	0.938	1.127	1.125	1.074	0.998	1.107	1.047	1.053	0.744	1.024	1.034	1.075	1.032	0.908	1.08	1.07	1.075	1.056	1.012	0.988	1.069	1.135	0.997	1.026	1.161	1.029
									0.873	1.022	1.088	1.076	0.562	0.926	1.024	1.089	0.981	1.105	1.098	1.098	1.065	1.054	1.044	0.934	1.128	1.126	1.073	0.997	1.107	1.047	1.053	0.745	1.015	1.026	1.069	1.028	0.909	1.081	1.071	1.075	1.055	1.013	0.986	1.066	1.136	0.99	1.027	1.162	1.027
									0.871	1.023	1.086	1.075	0.562	0.925	1.022	1.089	0.982	1.106	1.096	1.097	1.064	1.055	1.044	0.931	1.128	1.127	1.071	0.995	1.104	1.045	1.051	0.745	1.013	1.026	1.071	1.026	0.911	1.082	1.071	1.075	1.052	1.011	0.985	1.067	1.138	0.988	1.026	1.163	1.029
									0.87	1.023	1.085	1.077	0.562	0.925	1.021	1.089	0.984	1.107	1.097	1.095	1.064	1.053	1.042	0.93	1.13	1.127	1.072	0.995	1.103	1.046	1.05	0.746	1.014	1.027	1.07	1.026	0.911	1.086	1.072	1.074	1.051	1.01	0.984	1.068	1.138	0.988	1.024	1.163	1.028
									0.872	1.023	1.083	1.077	0.562	0.923	1.02	1.087	0.984	1.105	1.096	1.093	1.063	1.055	1.042	0.929	1.13	1.125	1.073	0.995	1.103	1.046	1.051	0.748	1.014	1.025	1.072	1.025	0.911	1.086	1.073	1.075	1.049	1.009	0.981	1.067	1.139	0.989	1.024	1.164	1.026
									0.874	1.022	1.083	1.076	0.561	0.921	1.021	1.086	0.984	1.103	1.094	1.091	1.063	1.054	1.041	0.931	1.128	1.127	1.073	0.996	1.103	1.045	1.052	0.749	1.013	1.025	1.072	1.024	0.913	1.088	1.072	1.075	1.049	1.01	0.98	1.068	1.14	0.99	1.025	1.164	1.026
									0.876	1.019	1.083	1.073	0.562	0.92	1.022	1.086	0.982	1.101	1.091	1.089	1.061	1.052	1.041	0.933	1.129	1.127	1.074	0.997	1.103	1.044	1.054	0.749	1.013	1.025	1.071	1.018	0.913	1.089	1.071	1.076	1.05	1.007	0.979	1.069	1.143	0.986	1.026	1.166	1.024
									0.877	1.017	1.085	1.074	0.562	0.919	1.022	1.086	0.984	1.098	1.088	1.088	1.062	1.05	1.042	0.933	1.129	1.125	1.075	0.998	1.101	1.043	1.054	0.75	1.014	1.023	1.073	1.017	0.913	1.089	1.069	1.077	1.05	1.007	0.977	1.069	1.144	0.987	1.025	1.166	1.023
									0.879	1.016	1.084	1.074	0.562	0.917	1.021	1.085	0.986	1.095	1.085	1.086	1.062	1.047	1.041	0.935	1.128	1.125	1.076	0.996	1.1	1.041	1.054	0.749	1.01	1.023	1.073	1.017	0.914	1.09	1.068	1.076	1.052	1.004	0.977	1.07	1.147	0.984	1.026	1.168	1.024
									0.876	1.015	1.084	1.072	0.562	0.916	1.022	1.082	0.989	1.095	1.085	1.084	1.06	1.047	1.041	0.933	1.129	1.123	1.076	0.998	1.1	1.04	1.056	0.751	1.012	1.024	1.074	1.018	0.915	1.089	1.067	1.077	1.051	1.006	0.975	1.068	1.148	0.986	1.028	1.168	1.024
									0.875	1.016	1.085	1.066	0.562	0.918	1.021	1.08	0.989	1.097	1.084	1.083	1.061	1.046	1.041	0.933	1.128	1.121	1.078	0.998	1.1	1.039	1.056	0.751	1.011	1.024	1.073	1.019	0.914	1.091	1.067	1.076	1.052	1.007	0.973	1.069	1.15	0.985	1.03	1.168	1.022
									0.876	1.017	1.085	1.066	0.561	0.916	1.02	1.081	0.99	1.099	1.084	1.081	1.061	1.045	1.041	0.933	1.127	1.122	1.077	1	1.1	1.038	1.057	0.751	1.01	1.023	1.072	1.019	0.914	1.092	1.068	1.076	1.049	1.006	0.974	1.069	1.15	0.984	1.03	1.171	1.022
									0.877	1.017	1.085	1.066	0.561	0.915	1.017	1.081	0.99	1.1	1.082	1.08	1.061	1.043	1.041	0.933	1.128	1.123	1.078	1.001	1.098	1.038	1.058	0.751	1.008	1.024	1.07	1.02	0.913	1.093	1.068	1.077	1.048	1.005	0.973	1.068	1.15	0.983	1.03	1.172	1.022
									0.878	1.014	1.085	1.068	0.561	0.915	1.016	1.081	0.99	1.102	1.081	1.077	1.06	1.043	1.04	0.933	1.129	1.123	1.078	1.001	1.096	1.037	1.059	0.75	1.006	1.023	1.069	1.022	0.911	1.094	1.067	1.077	1.048	1.004	0.971	1.068	1.151	0.983	1.03	1.173	1.022
									0.878	1.014	1.084	1.07	0.562	0.915	1.013	1.08	0.991	1.103	1.08	1.077	1.06	1.042	1.037	0.936	1.13	1.123	1.078	1.001	1.097	1.034	1.062	0.751	1.006	1.024	1.069	1.021	0.91	1.094	1.067	1.075	1.048	1.003	0.971	1.069	1.151	0.983	1.031	1.174	1.022
									0.879	1.015	1.086	1.07	0.561	0.915	1.01	1.08	0.993	1.103	1.076	1.076	1.06	1.043	1.036	0.937	1.129	1.123	1.079	1.002	1.095	1.034	1.063	0.75	1.008	1.022	1.071	1.022	0.91	1.093	1.066	1.074	1.048	1.003	0.97	1.069	1.154	0.981	1.031	1.175	1.022
									0.879	1.015	1.087	1.071	0.561	0.916	1.007	1.08	0.994	1.104	1.076	1.074	1.061	1.044	1.034	0.938	1.128	1.124	1.079	1.003	1.092	1.033	1.065	0.748	1.008	1.022	1.071	1.021	0.91	1.094	1.064	1.074	1.046	1.003	0.969	1.07	1.156	0.981	1.031	1.176	1.022
									0.881	1.015	1.089	1.073	0.561	0.916	1.008	1.079	0.992	1.106	1.076	1.073	1.061	1.045	1.035	0.938	1.129	1.124	1.079	1.003	1.091	1.032	1.065	0.748	1.008	1.022	1.072	1.019	0.911	1.093	1.063	1.075	1.045	1.003	0.968	1.069	1.155	0.982	1.032	1.178	1.022
									0.882	1.016	1.088	1.073	0.561	0.915	1.008	1.08	0.99	1.107	1.077	1.072	1.059	1.044	1.035	0.938	1.13	1.125	1.078	1.005	1.091	1.03	1.064	0.748	1.007	1.021	1.072	1.02	0.912	1.09	1.063	1.075	1.047	1.001	0.966	1.07	1.156	0.981	1.03	1.181	1.021
									0.884	1.015	1.088	1.073	0.56	0.913	1.009	1.079	0.989	1.108	1.076	1.07	1.057	1.042	1.036	0.939	1.13	1.124	1.079	1.005	1.088	1.029	1.062	0.749	1.007	1.02	1.072	1.021	0.915	1.087	1.063	1.075	1.047	0.999	0.966	1.072	1.157	0.983	1.03	1.182	1.019
									0.884	1.017	1.093	1.076	0.56	0.912	1.01	1.078	0.99	1.108	1.074	1.072	1.061	1.048	1.035	0.944	1.131	1.124	1.08	1.005	1.086	1.027	1.062	0.749	1.012	1.02	1.078	1.028	0.915	1.087	1.065	1.075	1.044	0.997	0.965	1.071	1.161	0.984	1.03	1.183	1.02
									0.884	1.017	1.089	1.071	0.559	0.91	1.011	1.077	0.99	1.104	1.076	1.07	1.054	1.043	1.035	0.941	1.131	1.124	1.079	1.005	1.086	1.027	1.062	0.75	1.004	1.017	1.074	1.023	0.918	1.087	1.066	1.075	1.045	0.996	0.965	1.071	1.16	0.983	1.032	1.184	1.021
									0.884	1.02	1.09	1.071	0.559	0.908	1.012	1.076	0.991	1.103	1.077	1.068	1.055	1.038	1.034	0.943	1.13	1.124	1.08	1.003	1.087	1.026	1.063	0.752	1.009	1.018	1.076	1.023	0.922	1.087	1.067	1.074	1.044	0.995	0.964	1.072	1.162	0.983	1.032	1.187	1.021
									0.885	1.02	1.09	1.07	0.558	0.907	1.012	1.076	0.988	1.103	1.078	1.066	1.055	1.031	1.034	0.943	1.129	1.122	1.081	1.002	1.085	1.025	1.064	0.753	1.005	1.016	1.074	1.022	0.922	1.089	1.067	1.073	1.043	0.995	0.963	1.07	1.163	0.985	1.034	1.189	1.018
									0.894	1.03	1.095	1.074	0.557	0.904	1.013	1.075	0.988	1.106	1.077	1.066	1.061	1.033	1.037	0.948	1.129	1.121	1.081	1.003	1.083	1.022	1.066	0.754	1.015	1.024	1.086	1.025	0.923	1.088	1.069	1.073	1.043	0.995	0.964	1.07	1.179	0.983	1.035	1.189	1.018
								12	0.89	1.021	1.089	1.077	0.555	0.903	1.013	1.075	0.988	1.107	1.076	1.063	1.055	1.03	1.041	0.948	1.129	1.124	1.08	1.002	1.083	1.023	1.066	0.753	1.008	1.016	1.079	1.02	0.924	1.089	1.07	1.072	1.042	0.994	0.963	1.069	1.164	0.98	1.036	1.189	1.018
[truncated: 28 more columns]

## Sheet: Figure 8
							Figure 8a	Meropenem																				Figure 8b	Phages																				Figure 8c
								Normalized Resistance (4000 Hz)																					Normalized Resistance (4000 Hz)
								Time (h)	Mero 0.05 µg/mL			Mero 5 µg/mL			Mero 50 µg/mL			Uninfected Control + Mero 50 µg/mL			Uninfected Control			Infection Control					Time (h)	Phages MOI 0.005			Phages MOI 0.5			Phages MOI 50			Uninfeted Control + Phages MOI 5			Uninfected Control			Infection Control
								-3	1	1	1	1	1	1	1	1	1	1	1	1	1	1	1	1	1	1			-3	1	1	1	1	1	1	1	1		1	1	1	1	1	1	1	1	1
									1	1.006	1.002	0.999	1.002	1.002	0.999	1.001	1	0.998	1	1	1	0.999	1	1	0.999	1				1.001	1.001	0.999	1.003	0.999	0.999	1	1.001		1.001	0.999	1	1	0.999	1	1	0.999	1
									0.999	1.005	1	0.998	1.001	1.001	1	1.003	1.001	0.999	1.001	0.997	1.001	0.997	1	1.001	0.997	0.998				1.001	1.001	0.999	1.002	0.999	0.998	0.998	1.001		1.001	0.997	0.999	1.001	0.997	1	1.001	0.997	0.998
									1	1.004	0.998	0.996	1.001	1.001	1.002	1.001	1.002	1	1.003	0.997	1.002	0.996	1.001	1.001	0.997	0.998				1.001	1.002	0.996	1.001	1	1	1	1.001		1	0.995	0.999	1.002	0.996	1.001	1.001	0.997	0.998
									0.999	1.003	0.998	0.997	0.999	0.999	1.003	1.002	1.003	1.002	1.002	0.996	1.004	0.995	1.002	1	0.997	0.998				1.002	1.002	0.997	1.002	0.999	1	0.997	1.002		1.001	0.994	0.997	1.004	0.995	1.002	1	0.997	0.998
									0.998	1.003	0.997	0.998	0.998	0.998	1.004	1.004	1.002	1.001	1.003	0.994	1.003	0.995	1.002	1.002	0.997	0.998				1.002	1.002	0.995	1.003	0.999	1	0.994	1.002		1	0.994	0.997	1.003	0.995	1.002	1.002	0.997	0.998
									0.997	1.002	0.996	0.998	0.999	0.999	1.005	1.004	1.002	1.001	1.002	0.993	1.003	0.995	1.002	1.001	0.997	0.998				1.001	1	0.991	1.004	0.997	1	0.993	1.001		1	0.994	0.997	1.003	0.995	1.002	1.001	0.997	0.998
									0.997	1.003	0.995	0.999	0.999	0.999	1.005	1.003	1.001	1	1	0.991	1.003	0.995	1.005	1	0.994	0.998				1	0.999	0.99	1.004	0.996	1	0.993	1.002		1	0.993	0.998	1.003	0.995	1.005	1	0.994	0.998
									0.998	1.002	0.994	1	1.001	1.001	1.006	1.003	1.003	1	0.999	0.99	1.003	0.996	1.005	1.001	0.994	0.999				0.998	0.999	0.988	1.004	0.997	0.999	0.993	1.004		1.001	0.991	0.999	1.003	0.996	1.005	1.001	0.994	0.999
									0.999	0.998	0.994	0.999	1.001	1.001	1.006	1.005	1.003	0.999	0.999	0.989	1.002	0.995	1.005	1.003	0.99	0.999				0.997	0.999	0.984	1.003	0.999	0.998	0.993	1.003		1.002	0.99	1.001	1.002	0.995	1.005	1.003	0.99	0.999
									1.002	0.995	0.996	0.999	1.001	1.001	1.005	1.004	1.004	0.999	1	0.99	1.002	0.994	1.004	1.003	0.989	0.999				0.998	0.999	0.983	1.004	0.998	0.998	0.994	1		1.002	0.99	1.002	1.002	0.994	1.004	1.003	0.989	0.999
									1.002	0.994	0.995	0.999	1.001	1.001	1.006	1.004	1.004	1	0.997	0.99	1.002	0.994	1.002	1.004	0.988	1.001				0.999	0.999	0.981	1.004	1.001	1	0.997	0.998		1.002	0.988	1.001	1.002	0.994	1.002	1.004	0.988	1.001
									1.003	0.994	0.996	1	1.003	1.003	1.007	1.005	1.006	1.002	0.998	0.99	1.003	0.992	1.001	1.006	0.989	1				0.999	0.999	0.979	1.002	1.002	0.999	0.996	0.997		1.001	0.988	1	1.003	0.992	1.001	1.006	0.989	1
									1.001	0.907	0.996	1	0.904	0.904	1.007	0.906	1.005	1.002	0.914	0.989	1.004	0.844	1.003	1.006	0.885	1				0.999	0.915	0.979	1.002	0.908	1	0.907	0.997		1.001	0.918	0.999	1.004	0.844	1.003	1.006	0.885	1
									1.001	0.92	0.892	0.999	0.919	0.919	1.007	0.92	0.88	1.002	0.922	0.883	1.005	0.886	0.886	1.008	0.903	0.89				1.001	0.925	0.873	1.002	0.919	0.887	0.916	0.88		1.001	0.934	0.89	1.005	0.886	0.886	1.008	0.903	0.89
								-2	1.002	0.925	0.902	1	0.926	0.926	1.004	0.931	0.893	1.001	0.924	0.895	1.005	0.911	0.903	1.011	0.913	0.901			-2	0.999	0.932	0.873	1.004	0.927	0.899	0.914	0.895		1.001	0.937	0.908	1.005	0.911	0.903	1.011	0.913	0.901
									0.93	0.925	0.911	0.922	0.928	0.928	0.934	0.935	0.905	0.933	0.92	0.902	0.93	0.918	0.917	0.935	0.914	0.906				0.928	0.929	0.884	0.929	0.927	0.912	0.908	0.905		0.937	0.933	0.918	0.93	0.918	0.917	0.935	0.914	0.906
									0.932	0.922	0.917	0.928	0.925	0.925	0.94	0.936	0.91	0.934	0.915	0.904	0.931	0.919	0.923	0.938	0.909	0.909				0.93	0.922	0.891	0.935	0.927	0.919	0.9	0.909		0.939	0.925	0.92	0.931	0.919	0.923	0.938	0.909	0.909
									0.93	0.919	0.921	0.929	0.922	0.922	0.941	0.932	0.91	0.932	0.91	0.907	0.929	0.919	0.924	0.937	0.905	0.914				0.928	0.918	0.898	0.936	0.924	0.923	0.891	0.909		0.936	0.918	0.919	0.929	0.919	0.924	0.937	0.905	0.914
									0.926	0.916	0.929	0.927	0.919	0.919	0.938	0.928	0.91	0.931	0.905	0.912	0.927	0.918	0.922	0.934	0.9	0.918				0.925	0.917	0.904	0.934	0.921	0.926	0.885	0.909		0.932	0.912	0.919	0.927	0.918	0.922	0.934	0.9	0.918
									0.923	0.913	0.937	0.925	0.915	0.915	0.936	0.925	0.909	0.928	0.901	0.917	0.925	0.917	0.923	0.931	0.896	0.926				0.92	0.915	0.908	0.931	0.916	0.926	0.879	0.91		0.927	0.906	0.918	0.925	0.917	0.923	0.931	0.896	0.926
									0.919	0.91	0.946	0.923	0.914	0.914	0.935	0.922	0.907	0.927	0.897	0.922	0.923	0.915	0.923	0.93	0.893	0.933				0.914	0.916	0.911	0.929	0.914	0.925	0.875	0.91		0.922	0.901	0.918	0.923	0.915	0.923	0.93	0.893	0.933
									0.916	0.907	0.952	0.921	0.91	0.91	0.932	0.918	0.907	0.926	0.894	0.927	0.921	0.915	0.922	0.928	0.889	0.939				0.911	0.918	0.913	0.926	0.912	0.924	0.873	0.912		0.919	0.897	0.919	0.921	0.915	0.922	0.928	0.889	0.939
									0.913	0.907	0.955	0.919	0.907	0.907	0.93	0.914	0.907	0.927	0.892	0.933	0.92	0.914	0.924	0.927	0.887	0.945				0.908	0.92	0.915	0.923	0.911	0.922	0.869	0.912		0.917	0.894	0.92	0.92	0.914	0.924	0.927	0.887	0.945
									0.91	0.908	0.961	0.917	0.904	0.904	0.928	0.911	0.907	0.927	0.89	0.937	0.919	0.914	0.925	0.927	0.884	0.948				0.907	0.923	0.916	0.921	0.908	0.922	0.869	0.913		0.918	0.892	0.922	0.919	0.914	0.925	0.927	0.884	0.948
									0.906	0.909	0.964	0.915	0.901	0.901	0.925	0.908	0.909	0.928	0.89	0.94	0.919	0.914	0.925	0.93	0.883	0.951				0.906	0.927	0.918	0.918	0.907	0.924	0.869	0.916		0.917	0.89	0.925	0.919	0.914	0.925	0.93	0.883	0.951
									0.905	0.912	0.968	0.914	0.898	0.898	0.922	0.906	0.91	0.928	0.888	0.943	0.92	0.915	0.926	0.929	0.882	0.954				0.905	0.93	0.919	0.917	0.906	0.926	0.869	0.918		0.917	0.892	0.928	0.92	0.915	0.926	0.929	0.882	0.954
									0.904	0.913	0.97	0.913	0.896	0.896	0.921	0.905	0.91	0.929	0.889	0.946	0.921	0.916	0.928	0.929	0.882	0.955				0.906	0.932	0.919	0.918	0.904	0.93	0.87	0.922		0.917	0.891	0.931	0.921	0.916	0.928	0.929	0.882	0.955
									0.904	0.917	0.97	0.911	0.895	0.895	0.918	0.903	0.914	0.929	0.889	0.949	0.923	0.917	0.929	0.929	0.883	0.957				0.909	0.936	0.92	0.919	0.903	0.932	0.871	0.927		0.918	0.893	0.934	0.923	0.917	0.929	0.929	0.883	0.957
									0.906	0.919	0.971	0.909	0.895	0.895	0.917	0.901	0.915	0.929	0.889	0.949	0.925	0.918	0.931	0.931	0.885	0.957				0.91	0.939	0.921	0.921	0.902	0.933	0.871	0.93		0.92	0.894	0.936	0.925	0.918	0.931	0.931	0.885	0.957
									0.907	0.921	0.972	0.908	0.893	0.893	0.917	0.899	0.917	0.928	0.89	0.95	0.926	0.921	0.932	0.932	0.886	0.958				0.911	0.94	0.921	0.923	0.902	0.936	0.872	0.933		0.923	0.895	0.939	0.926	0.921	0.932	0.932	0.886	0.958
									0.909	0.923	0.972	0.907	0.891	0.891	0.916	0.898	0.921	0.929	0.894	0.952	0.928	0.923	0.934	0.933	0.887	0.958				0.913	0.94	0.922	0.925	0.9	0.938	0.872	0.938		0.923	0.897	0.94	0.928	0.923	0.934	0.933	0.887	0.958
									0.911	0.926	0.972	0.907	0.89	0.89	0.917	0.897	0.924	0.929	0.895	0.953	0.928	0.925	0.936	0.934	0.889	0.959				0.916	0.942	0.924	0.926	0.9	0.939	0.87	0.94		0.925	0.899	0.941	0.928	0.925	0.936	0.934	0.889	0.959
									0.914	0.928	0.971	0.905	0.889	0.889	0.918	0.896	0.925	0.929	0.898	0.953	0.929	0.926	0.938	0.935	0.892	0.96				0.919	0.944	0.926	0.927	0.9	0.94	0.871	0.944		0.926	0.9	0.943	0.929	0.926	0.938	0.935	0.892	0.96
									0.916	0.931	0.971	0.905	0.887	0.887	0.918	0.896	0.926	0.929	0.901	0.954	0.93	0.929	0.94	0.936	0.893	0.961				0.919	0.946	0.928	0.927	0.899	0.943	0.872	0.947		0.928	0.902	0.944	0.93	0.929	0.94	0.936	0.893	0.961
									0.918	0.933	0.971	0.904	0.885	0.885	0.919	0.895	0.929	0.929	0.904	0.953	0.931	0.931	0.941	0.937	0.896	0.96				0.922	0.948	0.931	0.927	0.9	0.944	0.873	0.947		0.929	0.904	0.946	0.931	0.931	0.941	0.937	0.896	0.96
									0.92	0.936	0.972	0.904	0.884	0.884	0.919	0.895	0.929	0.93	0.907	0.955	0.933	0.934	0.942	0.938	0.898	0.961				0.923	0.949	0.932	0.927	0.901	0.945	0.875	0.95		0.929	0.906	0.947	0.933	0.934	0.942	0.938	0.898	0.961
									0.922	0.938	0.955	0.903	0.883	0.883	0.919	0.893	0.913	0.929	0.909	0.934	0.934	0.938	0.922	0.938	0.899	0.939				0.925	0.952	0.904	0.927	0.902	0.928	0.876	0.923		0.931	0.908	0.919	0.934	0.938	0.922	0.938	0.899	0.939
									0.924	0.941	0.95	0.902	0.882	0.882	0.919	0.892	0.909	0.929	0.914	0.92	0.935	0.941	0.916	0.939	0.902	0.928				0.928	0.953	0.906	0.927	0.902	0.921	0.878	0.917		0.931	0.91	0.914	0.935	0.941	0.916	0.939	0.902	0.928
									0.927	0.941	0.936	0.901	0.881	0.881	0.92	0.891	0.906	0.929	0.918	0.905	0.936	0.944	0.911	0.94	0.905	0.919				0.929	0.955	0.892	0.927	0.902	0.91	0.881	0.912		0.932	0.913	0.908	0.936	0.944	0.911	0.94	0.905	0.919
								0	0.929	0.944	0.924	0.901	0.88	0.88	0.918	0.89	0.904	0.928	0.922	0.901	0.937	0.948	0.908	0.939	0.91	0.917			0	0.931	0.957	0.884	0.928	0.904	0.901	0.883	0.911		0.932	0.915	0.907	0.937	0.948	0.908	0.939	0.91	0.917
									0.925	0.945	0.92	0.895	0.88	0.88	0.913	0.889	0.904	0.924	0.926	0.905	0.933	0.951	0.908	0.934	0.913	0.92				0.923	0.96	0.886	0.924	0.905	0.899	0.886	0.912		0.93	0.919	0.908	0.933	0.951	0.908	0.934	0.913	0.92
									0.919	0.947	0.926	0.894	0.881	0.881	0.913	0.889	0.905	0.919	0.93	0.915	0.928	0.954	0.91	0.931	0.915	0.926				0.913	0.961	0.898	0.919	0.906	0.901	0.888	0.915		0.926	0.923	0.911	0.928	0.954	0.91	0.931	0.915	0.926
									0.916	0.949	0.935	0.894	0.882	0.882	0.913	0.89	0.907	0.915	0.936	0.924	0.924	0.956	0.913	0.927	0.919	0.934				0.91	0.963	0.909	0.916	0.907	0.908	0.891	0.918		0.922	0.926	0.914	0.924	0.956	0.913	0.927	0.919	0.934
									0.915	0.95	0.943	0.894	0.883	0.883	0.914	0.89	0.91	0.914	0.942	0.932	0.923	0.958	0.918	0.926	0.922	0.94				0.909	0.963	0.916	0.914	0.907	0.914	0.894	0.922		0.922	0.929	0.919	0.923	0.958	0.918	0.926	0.922	0.94
									0.917	0.93	0.949	0.895	0.879	0.879	0.914	0.891	0.913	0.915	0.916	0.938	0.925	0.933	0.922	0.928	0.898	0.946				0.911	0.945	0.921	0.914	0.901	0.919	0.876	0.926		0.923	0.905	0.923	0.925	0.933	0.922	0.928	0.898	0.946
									0.919	0.921	0.953	0.897	0.876	0.876	0.916	0.888	0.914	0.918	0.909	0.942	0.93	0.926	0.926	0.931	0.894	0.95				0.917	0.934	0.925	0.917	0.893	0.923	0.875	0.93		0.927	0.9	0.927	0.93	0.926	0.926	0.931	0.894	0.95
									0.924	0.912	0.958	0.898	0.874	0.874	0.918	0.887	0.917	0.923	0.903	0.945	0.934	0.918	0.93	0.935	0.89	0.952				0.924	0.921	0.928	0.919	0.889	0.926	0.874	0.934		0.93	0.894	0.931	0.934	0.918	0.93	0.935	0.89	0.952
									0.929	0.906	0.96	0.901	0.874	0.874	0.919	0.886	0.92	0.925	0.901	0.947	0.938	0.918	0.935	0.94	0.888	0.954				0.93	0.914	0.929	0.922	0.886	0.929	0.874	0.937		0.933	0.892	0.934	0.938	0.918	0.935	0.94	0.888	0.954
									0.934	0.904	0.963	0.901	0.874	0.874	0.921	0.886	0.924	0.928	0.904	0.951	0.941	0.925	0.939	0.941	0.891	0.958				0.934	0.916	0.936	0.925	0.886	0.935	0.875	0.941		0.934	0.895	0.938	0.941	0.925	0.939	0.941	0.891	0.958
									0.937	0.909	0.967	0.903	0.874	0.874	0.922	0.887	0.926	0.931	0.909	0.954	0.943	0.932	0.944	0.943	0.895	0.963				0.938	0.924	0.94	0.927	0.888	0.938	0.879	0.945		0.937	0.9	0.943	0.943	0.932	0.944	0.943	0.895	0.963
									0.94	0.913	0.971	0.903	0.875	0.875	0.921	0.887	0.929	0.932	0.912	0.958	0.946	0.938	0.949	0.943	0.899	0.966				0.94	0.933	0.943	0.928	0.891	0.942	0.882	0.95		0.94	0.905	0.948	0.946	0.938	0.949	0.943	0.899	0.966
									0.944	0.92	0.973	0.904	0.876	0.876	0.921	0.888	0.932	0.934	0.918	0.963	0.947	0.945	0.953	0.944	0.904	0.97				0.943	0.941	0.947	0.929	0.893	0.948	0.885	0.954		0.942	0.911	0.95	0.947	0.945	0.953	0.944	0.904	0.97
									0.949	0.927	0.975	0.905	0.876	0.876	0.921	0.89	0.936	0.936	0.924	0.964	0.949	0.95	0.958	0.946	0.907	0.973				0.946	0.948	0.951	0.931	0.896	0.952	0.888	0.957		0.945	0.917	0.955	0.949	0.95	0.958	0.946	0.907	0.973
									0.951	0.934	0.977	0.906	0.877	0.877	0.92	0.89	0.938	0.938	0.929	0.966	0.951	0.954	0.962	0.947	0.913	0.975				0.948	0.954	0.956	0.933	0.899	0.955	0.892	0.962		0.948	0.922	0.959	0.951	0.954	0.962	0.947	0.913	0.975
									0.951	0.938	0.981	0.906	0.879	0.879	0.92	0.893	0.942	0.939	0.937	0.968	0.952	0.96	0.966	0.949	0.919	0.977				0.95	0.959	0.958	0.933	0.902	0.958	0.897	0.967		0.949	0.926	0.961	0.952	0.96	0.966	0.949	0.919	0.977
									0.953	0.944	0.986	0.907	0.882	0.882	0.921	0.895	0.944	0.941	0.944	0.97	0.954	0.965	0.968	0.949	0.923	0.98				0.951	0.962	0.963	0.935	0.903	0.964	0.902	0.97		0.951	0.931	0.965	0.954	0.965	0.968	0.949	0.923	0.98
									0.956	0.947	0.99	0.908	0.882	0.882	0.922	0.898	0.948	0.944	0.952	0.973	0.956	0.97	0.972	0.952	0.928	0.984				0.953	0.966	0.966	0.936	0.907	0.967	0.907	0.974		0.953	0.936	0.969	0.956	0.97	0.972	0.952	0.928	0.984
									0.959	0.954	0.993	0.908	0.884	0.884	0.922	0.902	0.951	0.947	0.958	0.975	0.959	0.974	0.976	0.952	0.933	0.988				0.956	0.971	0.971	0.939	0.909	0.972	0.912	0.976		0.956	0.941	0.972	0.959	0.974	0.976	0.952	0.933	0.988
								1	0.962	0.957	0.995	0.907	0.887	0.887	0.923	0.903	0.954	0.949	0.963	0.979	0.961	0.978	0.977	0.953	0.937	0.993			1	0.959	0.975	0.975	0.94	0.913	0.976	0.916	0.977		0.959	0.944	0.977	0.961	0.978	0.977	0.953	0.937	0.993
									0.963	0.962	0.998	0.909	0.888	0.888	0.922	0.907	0.956	0.95	0.969	0.981	0.962	0.982	0.98	0.954	0.942	0.996				0.963	0.978	0.979	0.942	0.917	0.98	0.919	0.981		0.959	0.949	0.981	0.962	0.982	0.98	0.954	0.942	0.996
									0.965	0.966	0.999	0.908	0.891	0.891	0.922	0.91	0.958	0.952	0.974	0.982	0.964	0.987	0.981	0.956	0.946	0.998				0.966	0.983	0.981	0.943	0.921	0.983	0.923	0.983		0.961	0.953	0.985	0.964	0.987	0.981	0.956	0.946	0.998
									0.965	0.97	1	0.909	0.892	0.892	0.921	0.912	0.962	0.953	0.978	0.983	0.966	0.99	0.984	0.957	0.949	1				0.97	0.987	0.985	0.944	0.925	0.985	0.927	0.986		0.962	0.958	0.988	0.966	0.99	0.984	0.957	0.949	1
									0.967	0.972	1.002	0.909	0.893	0.893	0.921	0.916	0.962	0.954	0.982	0.986	0.968	0.995	0.986	0.958	0.953	1.001				0.974	0.992	0.989	0.943	0.926	0.987	0.931	0.986		0.963	0.964	0.987	0.968	0.995	0.986	0.958	0.953	1.001
									0.968	0.976	1.006	0.909	0.896	0.896	0.923	0.918	0.963	0.957	0.986	0.987	0.971	0.998	0.987	0.959	0.957	1.003				0.977	0.996	0.993	0.943	0.93	0.988	0.934	0.987		0.966	0.97	0.99	0.971	0.998	0.987	0.959	0.957	1.003
									0.97	0.979	1.009	0.911	0.899	0.899	0.922	0.92	0.966	0.958	0.991	0.989	0.972	1.002	0.989	0.961	0.962	1.005				0.978	0.997	0.996	0.942	0.934	0.989	0.937	0.99		0.965	0.975	0.99	0.972	1.002	0.989	0.961	0.962	1.005
									0.971	0.979	1.01	0.911	0.902	0.902	0.922	0.924	0.969	0.961	0.992	0.991	0.973	1.005	0.99	0.961	0.965	1.009				0.977	1	0.999	0.943	0.936	0.992	0.942	0.993		0.967	0.979	0.99	0.973	1.005	0.99	0.961	0.965	1.009
									0.973	0.981	1.013	0.912	0.905	0.905	0.921	0.926	0.972	0.961	0.996	0.994	0.974	1.009	0.991	0.963	0.97	1.01				0.977	1	1.003	0.944	0.939	0.992	0.947	0.995		0.967	0.982	0.993	0.974	1.009	0.991	0.963	0.97	1.01
									0.976	0.981	1.014	0.911	0.907	0.907	0.922	0.928	0.971	0.962	0.999	0.997	0.976	1.012	0.993	0.966	0.972	1.012				0.978	1.002	1.006	0.945	0.942	0.993	0.949	0.995		0.968	0.984	0.994	0.976	1.012	0.993	0.966	0.972	1.012
									0.976	0.985	1.016	0.911	0.909	0.909	0.921	0.931	0.972	0.962	0.999	0.998	0.977	1.015	0.991	0.968	0.976	1.012				0.98	1.003	1.009	0.947	0.946	0.994	0.953	0.996		0.968	0.985	0.994	0.977	1.015	0.991	0.968	0.976	1.012
									0.977	0.989	1.019	0.911	0.911	0.911	0.923	0.934	0.972	0.962	1.004	0.999	0.978	1.017	0.991	0.967	0.979	1.013				0.98	1.005	1.013	0.947	0.948	0.994	0.956	0.995		0.968	0.988	0.994	0.978	1.017	0.991	0.967	0.979	1.013
									0.979	0.992	1.019	0.912	0.913	0.913	0.925	0.935	0.973	0.964	1.008	0.999	0.979	1.019	0.992	0.968	0.982	1.015				0.98	1.008	1.017	0.948	0.95	0.993	0.959	0.995		0.97	0.989	0.997	0.979	1.019	0.992	0.968	0.982	1.015
									0.977	0.994	0.976	0.912	0.913	0.913	0.926	0.938	0.958	0.965	1.01	0.951	0.979	1.021	0.968	0.967	0.985	0.968				0.98	1.008	0.928	0.949	0.953	0.951	0.961	0.954		0.969	0.991	0.971	0.979	1.021	0.968	0.967	0.985	0.968
									0.977	0.997	0.969	0.913	0.915	0.915	0.926	0.941	0.95	0.964	1.012	0.944	0.98	1.024	0.953	0.966	0.987	0.961				0.979	1.01	0.939	0.949	0.955	0.945	0.965	0.945		0.97	0.993	0.958	0.98	1.024	0.953	0.966	0.987	0.961
									0.977	0.999	0.96	0.912	0.915	0.915	0.926	0.944	0.94	0.963	1.015	0.939	0.982	1.026	0.942	0.965	0.989	0.959				0.979	1.012	0.946	0.95	0.955	0.938	0.967	0.942		0.97	0.995	0.947	0.982	1.026	0.942	0.965	0.989	0.959
									0.977	1	0.958	0.913	0.915	0.915	0.927	0.945	0.933	0.962	1.018	0.94	0.983	1.028	0.938	0.965	0.99	0.961				0.979	1.014	0.951	0.951	0.956	0.935	0.969	0.941		0.969	0.996	0.943	0.983	1.028	0.938	0.965	0.99	0.961
									0.976	1.002	0.96	0.913	0.918	0.918	0.928	0.946	0.932	0.962	1.019	0.948	0.984	1.029	0.938	0.965	0.993	0.967				0.98	1.015	0.956	0.951	0.957	0.934	0.97	0.94		0.97	0.998	0.943	0.984	1.029	0.938	0.965	0.993	0.967
									0.977	1.004	0.973	0.913	0.921	0.921	0.929	0.946	0.931	0.963	1.021	0.961	0.984	1.032	0.942	0.964	0.995	0.978				0.98	1.016	0.967	0.952	0.957	0.939	0.971	0.943		0.97	0.998	0.948	0.984	1.032	0.942	0.964	0.995	0.978
									0.976	1.006	0.983	0.915	0.922	0.922	0.928	0.948	0.934	0.963	1.022	0.972	0.983	1.033	0.95	0.964	0.996	0.988				0.982	1.018	0.976	0.953	0.958	0.946	0.971	0.948		0.969	0.999	0.957	0.983	1.033	0.95	0.964	0.996	0.988
								2	0.978	1.007	0.992	0.916	0.923	0.923	0.929	0.951	0.94	0.964	1.022	0.98	0.984	1.036	0.957	0.964	0.999	0.995			2	0.982	1.02	0.984	0.953	0.959	0.954	0.972	0.956		0.97	1.001	0.964	0.984	1.036	0.957	0.964	0.999	0.995
									0.973	0.963	0.997	0.92	0.924	0.924	0.931	0.953	0.946	0.96	0.973	0.988	0.976	0.969	0.965	0.956	0.951	1.001				0.968	0.974	0.993	0.948	0.947	0.963	0.93	0.961		0.962	0.952	0.97	0.976	0.969	0.965	0.956	0.951	1.001
									0.968	0.955	1.001	0.915	0.915	0.915	0.927	0.943	0.953	0.956	0.966	0.995	0.969	0.971	0.971	0.949	0.947	1.007				0.962	0.97	0.997	0.942	0.938	0.969	0.922	0.966		0.956	0.947	0.974	0.969	0.971	0.971	0.949	0.947	1.007
									0.959	0.95	1.006	0.909	0.901	0.901	0.922	0.929	0.96	0.947	0.96	0.998	0.96	0.97	0.975	0.941	0.942	1.013				0.955	0.965	1.005	0.936	0.928	0.974	0.916	0.969		0.946	0.944	0.98	0.96	0.97	0.975	0.941	0.942	1.013
									0.951	0.945	1.012	0.902	0.891	0.891	0.917	0.919	0.963	0.941	0.958	1.003	0.951	0.971	0.979	0.935	0.939	1.018				0.949	0.964	1.01	0.93	0.922	0.982	0.914	0.973		0.94	0.944	0.985	0.951	0.971	0.979	0.935	0.939	1.018
									0.944	0.939	1.015	0.897	0.887	0.887	0.914	0.914	0.967	0.939	0.957	1.009	0.949	0.973	0.983	0.935	0.937	1.023				0.944	0.963	1.016	0.928	0.919	0.988	0.913	0.978		0.94	0.945	0.989	0.949	0.973	0.983	0.935	0.937	1.023
									0.943	0.939	1.023	0.895	0.885	0.885	0.911	0.912	0.973	0.94	0.961	1.015	0.952	0.979	0.988	0.938	0.94	1.027				0.943	0.969	1.02	0.927	0.917	0.994	0.914	0.983		0.942	0.949	0.994	0.952	0.979	0.988	0.938	0.94	1.027
									0.947	0.948	1.027	0.894	0.885	0.885	0.911	0.913	0.978	0.942	0.968	1.021	0.956	0.987	0.993	0.943	0.946	1.031				0.947	0.98	1.026	0.929	0.919	0.998	0.918	0.988		0.945	0.957	0.998	0.956	0.987	0.993	0.943	0.946	1.031
									0.955	0.956	1.032	0.896	0.889	0.889	0.914	0.915	0.984	0.945	0.977	1.026	0.962	0.994	0.996	0.945	0.954	1.036				0.954	0.99	1.029	0.933	0.924	1.002	0.921	0.992		0.951	0.965	1.005	0.962	0.994	0.996	0.945	0.954	1.036
									0.961	0.961	1.038	0.897	0.893	0.893	0.916	0.92	0.989	0.95	0.986	1.033	0.968	1.001	0.999	0.949	0.96	1.041				0.96	0.997	1.031	0.937	0.93	1.008	0.927	0.998		0.954	0.973	1.01	0.968	1.001	0.999	0.949	0.96	1.041
									0.967	0.966	1.045	0.901	0.898	0.898	0.919	0.924	0.994	0.954	0.992	1.039	0.973	1.006	1.002	0.953	0.968	1.046				0.967	1.002	1.033	0.942	0.937	1.011	0.932	1.006		0.958	0.979	1.014	0.973	1.006	1.002	0.953	0.968	1.046
									0.971	0.972	1.05	0.904	0.901	0.901	0.923	0.932	1	0.958	1	1.042	0.978	1.013	1.006	0.957	0.974	1.051				0.971	1.009	1.035	0.946	0.943	1.018	0.938	1.012		0.961	0.987	1.018	0.978	1.013	1.006	0.957	0.974	1.051
									0.975	0.978	1.056	0.908	0.907	0.907	0.926	0.939	1.006	0.962	1.005	1.047	0.983	1.019	1.009	0.961	0.981	1.057				0.976	1.012	1.041	0.948	0.95	1.026	0.944	1.019		0.964	0.991	1.021	0.983	1.019	1.009	0.961	0.981	1.057
									0.977	0.985	1.061	0.912	0.913	0.913	0.929	0.945	1.013	0.965	1.011	1.053	0.987	1.025	1.014	0.963	0.987	1.063				0.978	1.016	1.043	0.95	0.954	1.031	0.95	1.024		0.968	0.998	1.024	0.987	1.025	1.014	0.963	0.987	1.063
									0.979	0.99	1.066	0.915	0.917	0.917	0.933	0.952	1.019	0.967	1.016	1.058	0.99	1.029	1.019	0.966	0.996	1.067				0.981	1.021	1.046	0.952	0.957	1.038	0.956	1.031		0.971	1.004	1.027	0.99	1.029	1.019	0.966	0.996	1.067
									0.983	0.995	1.071	0.919	0.924	0.924	0.939	0.959	1.025	0.97	1.022	1.062	0.994	1.034	1.024	0.97	1	1.072				0.983	1.026	1.051	0.954	0.962	1.045	0.963	1.036		0.974	1.008	1.03	0.994	1.034	1.024	0.97	1	1.072
									0.986	1.002	1.075	0.924	0.929	0.929	0.942	0.964	1.029	0.973	1.026	1.065	0.998	1.039	1.028	0.972	1.005	1.077				0.985	1.028	1.054	0.956	0.967	1.05	0.969	1.041		0.978	1.014	1.035	0.998	1.039	1.028	0.972	1.005	1.077
									0.991	1.007	1.079	0.928	0.933	0.933	0.946	0.97	1.033	0.979	1.03	1.066	1.002	1.043	1.031	0.973	1.011	1.08				0.987	1.033	1.06	0.96	0.972	1.054	0.974	1.044		0.98	1.02	1.038	1.002	1.043	1.031	0.973	1.011	1.08
									0.994	1.011	1.084	0.932	0.94	0.94	0.948	0.975	1.034	0.983	1.036	1.071	1.006	1.047	1.033	0.976	1.016	1.084				0.991	1.038	1.063	0.963	0.976	1.057	0.977	1.048		0.984	1.027	1.039	1.006	1.047	1.033	0.976	1.016	1.084
									0.996	1.018	1.089	0.937	0.945	0.945	0.954	0.979	1.034	0.986	1.042	1.075	1.01	1.051	1.036	0.979	1.023	1.089				0.993	1.043	1.066	0.968	0.98	1.062	0.984	1.05		0.987	1.031	1.044	1.01	1.051	1.036	0.979	1.023	1.089
									1	1.023	1.093	0.939	0.951	0.951	0.961	0.986	1.032	0.992	1.049	1.079	1.014	1.054	1.04	0.982	1.026	1.092				0.999	1.048	1.07	0.972	0.986	1.068	0.991	1.051		0.99	1.035	1.044	1.014	1.054	1.04	0.982	1.026	1.092
									1.004	1.028	1.095	0.942	0.956	0.956	0.967	0.99	1.036	0.995	1.056	1.079	1.018	1.06	1.041	0.985	1.03	1.096				1.001	1.052	1.074	0.974	0.992	1.07	0.998	1.053		0.992	1.04	1.047	1.018	1.06	1.041	0.985	1.03	1.096
								3	1.009	1.03	1.098	0.948	0.962	0.962	0.971	0.995	1.04	1	1.063	1.082	1.022	1.065	1.044	0.989	1.034	1.098			3	1.004	1.055	1.079	0.975	0.996	1.074	1.003	1.054		0.996	1.045	1.049	1.022	1.065	1.044	0.989	1.034	1.098
									1.014	1.033	1.1	0.95	0.969	0.969	0.976	0.998	1.042	1.005	1.07	1.086	1.025	1.071	1.045	0.993	1.044	1.099				1.006	1.059	1.083	0.978	1.002	1.076	1.009	1.056		1.002	1.051	1.051	1.025	1.071	1.045	0.993	1.044	1.099
									1.019	1.039	1.101	0.955	0.972	0.972	0.981	1.005	1.043	1.007	1.075	1.087	1.029	1.075	1.046	0.996	1.052	1.101				1.01	1.062	1.087	0.982	1.006	1.078	1.016	1.059		1.008	1.056	1.053	1.029	1.075	1.046	0.996	1.052	1.101
									1.024	1.042	1.103	0.962	0.977	0.977	0.987	1.011	1.046	1.011	1.08	1.089	1.032	1.079	1.047	0.998	1.057	1.103				1.015	1.065	1.09	0.986	1.011	1.083	1.027	1.061		1.012	1.062	1.055	1.032	1.079	1.047	0.998	1.057	1.103
									1.027	1.047	1.107	0.965	0.983	0.983	0.993	1.016	1.051	1.015	1.087	1.093	1.036	1.084	1.048	1	1.062	1.104				1.018	1.07	1.092	0.989	1.016	1.085	1.03	1.063		1.016	1.066	1.058	1.036	1.084	1.048	1	1.062	1.104
									1.031	1.054	1.108	0.967	0.988	0.988	0.998	1.021	1.05	1.02	1.09	1.095	1.039	1.087	1.049	1.003	1.068	1.106				1.021	1.075	1.093	0.991	1.02	1.087	1.035	1.067		1.019	1.072	1.058	1.039	1.087	1.049	1.003	1.068	1.106
									1.033	1.059	1.111	0.967	0.992	0.992	1.003	1.027	1.05	1.023	1.093	1.099	1.043	1.09	1.05	1.004	1.073	1.106				1.025	1.078	1.098	0.996	1.023	1.089	1.038	1.072		1.022	1.076	1.06	1.043	1.09	1.05	1.004	1.073	1.106
									1.036	1.062	1.113	0.97	0.996	0.996	1.007	1.03	1.049	1.026	1.095	1.103	1.045	1.094	1.05	1.008	1.076	1.109				1.026	1.081	1.1	0.997	1.025	1.09	1.043	1.075		1.023	1.081	1.062	1.045	1.094	1.05	1.008	1.076	1.109
									1.039	1.065	1.114	0.975	1.001	1.001	1.01	1.035	1.051	1.026	1.099	1.103	1.047	1.098	1.052	1.01	1.079	1.11				1.03	1.086	1.105	1.002	1.03	1.092	1.046	1.077		1.027	1.086	1.063	1.047	1.098	1.052	1.01	1.079	1.11
									1.04	1.071	1.115	0.98	1.005	1.005	1.015	1.039	1.055	1.028	1.102	1.104	1.048	1.1	1.054	1.015	1.082	1.112				1.033	1.088	1.109	1.007	1.032	1.092	1.047	1.078		1.03	1.088	1.064	1.048	1.1	1.054	1.015	1.082	1.112
									1.041	1.072	1.117	0.984	1.007	1.007	1.02	1.041	1.057	1.029	1.105	1.109	1.05	1.103	1.057	1.017	1.086	1.115				1.035	1.09	1.111	1.01	1.036	1.093	1.048	1.078		1.03	1.092	1.066	1.05	1.103	1.057	1.017	1.086	1.115
									1.042	1.076	1.12	0.986	1.008	1.008	1.023	1.044	1.058	1.031	1.108	1.114	1.051	1.106	1.059	1.02	1.09	1.119				1.039	1.095	1.114	1.014	1.039	1.095	1.049	1.078		1.031	1.093	1.067	1.051	1.106	1.059	1.02	1.09	1.119
									1.044	1.078	1.12	0.989	1.009	1.009	1.025	1.044	1.061	1.033	1.11	1.118	1.053	1.109	1.062	1.024	1.092	1.121				1.04	1.097	1.118	1.015	1.041	1.096	1.05	1.081		1.03	1.095	1.069	1.053	1.109	1.062	1.024	1.092	1.121
									1.044	1.082	1.122	0.991	1.01	1.01	1.027	1.044	1.064	1.032	1.113	1.12	1.054	1.112	1.064	1.025	1.093	1.124				1.043	1.099	1.118	1.016	1.044	1.097	1.051	1.085		1.029	1.096	1.071	1.054	1.112	1.064	1.025	1.093	1.124
									1.044	1.081	1.127	0.991	1.009	1.009	1.028	1.047	1.066	1.033	1.114	1.124	1.054	1.114	1.063	1.027	1.094	1.126				1.044	1.102	1.119	1.018	1.045	1.099	1.054	1.085		1.029	1.099	1.074	1.054	1.114	1.063	1.027	1.094	1.126
									1.047	1.082	1.129	0.992	1.007	1.007	1.026	1.05	1.069	1.035	1.117	1.126	1.054	1.117	1.064	1.027	1.095	1.126				1.044	1.106	1.123	1.018	1.048	1.1	1.052	1.086		1.029	1.103	1.077	1.054	1.117	1.064	1.027	1.095	1.126
									1.044	1.084	1.13	0.993	1.008	1.008	1.024	1.049	1.071	1.035	1.121	1.128	1.054	1.118	1.066	1.027	1.096	1.128				1.047	1.107	1.124	1.019	1.048	1.102	1.051	1.088		1.029	1.105	1.079	1.054	1.118	1.066	1.027	1.096	1.128
									1.044	1.087	1.132	0.992	1.009	1.009	1.023	1.049	1.074	1.035	1.121	1.132	1.054	1.12	1.067	1.029	1.096	1.126				1.045	1.11	1.125	1.019	1.05	1.105	1.053	1.091		1.03	1.105	1.08	1.054	1.12	1.067	1.029	1.096	1.126
									1.044	1.09	1.134	0.994	1.009	1.009	1.023	1.051	1.076	1.036	1.121	1.134	1.055	1.122	1.067	1.029	1.097	1.123				1.045	1.113	1.127	1.019	1.053	1.11	1.053	1.091		1.03	1.108	1.082	1.055	1.122	1.067	1.029	1.097	1.123
									1.043	1.086	1.134	0.992	1.01	1.01	1.022	1.056	1.078	1.039	1.122	1.139	1.056	1.123	1.07	1.031	1.099	1.122				1.045	1.115	1.131	1.02	1.054	1.112	1.057	1.093		1.032	1.109	1.085	1.056	1.123	1.07	1.031	1.099	1.122
									1.045	1.086	1.135	0.991	1.012	1.012	1.023	1.055	1.083	1.039	1.123	1.141	1.056	1.125	1.071	1.033	1.099	1.119				1.046	1.115	1.132	1.021	1.054	1.114	1.058	1.094		1.033	1.11	1.087	1.056	1.125	1.071	1.033	1.099	1.119
								4	1.045	1.089	1.135	0.989	1.013	1.013	1.023	1.058	1.083	1.039	1.123	1.145	1.055	1.127	1.072	1.037	1.099	1.114			4	1.048	1.118	1.134	1.021	1.055	1.114	1.059	1.096		1.036	1.112	1.088	1.055	1.127	1.072	1.037	1.099	1.114
									1.046	1.092	1.135	0.989	1.012	1.012	1.021	1.057	1.087	1.039	1.123	1.148	1.056	1.129	1.073	1.038	1.103	1.108				1.05	1.123	1.137	1.023	1.054	1.116	1.059	1.097		1.04	1.115	1.09	1.056	1.129	1.073	1.038	1.103	1.108
									1.047	1.093	1.132	0.99	1.013	1.013	1.02	1.057	1.089	1.038	1.123	1.151	1.058	1.131	1.073	1.039	1.104	1.101				1.051	1.125	1.14	1.024	1.054	1.119	1.058	1.099		1.04	1.116	1.09	1.058	1.131	1.073	1.039	1.104	1.101
									1.046	1.095	1.131	0.993	1.012	1.012	1.02	1.058	1.092	1.038	1.124	1.153	1.058	1.132	1.075	1.039	1.104	1.09				1.05	1.125	1.144	1.026	1.054	1.122	1.06	1.103		1.041	1.121	1.093	1.058	1.132	1.075	1.039	1.104	1.09
									1.049	1.096	1.128	0.995	1.012	1.012	1.02	1.058	1.093	1.039	1.124	1.155	1.058	1.133	1.077	1.038	1.104	1.081				1.052	1.127	1.148	1.029	1.057	1.126	1.059	1.105		1.041	1.122	1.096	1.058	1.133	1.077	1.038	1.104	1.081
									1.05	1.097	1.125	0.994	1.013	1.013	1.021	1.057	1.096	1.039	1.126	1.156	1.059	1.134	1.078	1.038	1.105	1.074				1.053	1.13	1.15	1.03	1.058	1.13	1.06	1.109		1.043	1.124	1.099	1.059	1.134	1.078	1.038	1.105	1.074
									1.051	1.098	1.121	0.996	1.013	1.013	1.022	1.056	1.099	1.039	1.126	1.158	1.059	1.134	1.079	1.039	1.107	1.069				1.053	1.131	1.153	1.032	1.056	1.13	1.06	1.111		1.042	1.127	1.1	1.059	1.134	1.079	1.039	1.107	1.069
									1.05	1.099	1.118	0.997	1.015	1.015	1.021	1.056	1.102	1.042	1.125	1.16	1.06	1.135	1.08	1.039	1.108	1.063				1.057	1.131	1.155	1.032	1.055	1.132	1.059	1.116		1.043	1.128	1.102	1.06	1.135	1.08	1.039	1.108	1.063
									1.05	1.099	1.113	0.998	1.018	1.018	1.02	1.055	1.105	1.044	1.125	1.161	1.061	1.136	1.083	1.04	1.107	1.058				1.056	1.133	1.158	1.032	1.055	1.134	1.06	1.117		1.042	1.13	1.103	1.061	1.136	1.083	1.04	1.107	1.058
									1.05	1.102	1.108	0.999	1.019	1.019	1.021	1.056	1.105	1.045	1.127	1.163	1.062	1.138	1.083	1.04	1.109	1.053				1.057	1.134	1.159	1.034	1.056	1.135	1.061	1.118		1.042	1.131	1.104	1.062	1.138	1.083	1.04	1.109	1.053
									1.052	1.105	1.106	1.001	1.021	1.021	1.02	1.057	1.106	1.043	1.129	1.168	1.064	1.14	1.085	1.041	1.11	1.051				1.058	1.136	1.162	1.033	1.054	1.137	1.062	1.119		1.042	1.132	1.105	1.064	1.14	1.085	1.041	1.11	1.051
									1.053	1.108	1.103	1.002	1.022	1.022	1.02	1.055	1.109	1.043	1.13	1.17	1.065	1.141	1.086	1.041	1.111	1.048				1.059	1.137	1.165	1.034	1.053	1.136	1.062	1.122		1.043	1.132	1.107	1.065	1.141	1.086	1.041	1.111	1.048
									1.053	1.109	1.099	1.006	1.022	1.022	1.02	1.057	1.114	1.045	1.131	1.175	1.064	1.142	1.089	1.042	1.11	1.046				1.062	1.139	1.168	1.034	1.055	1.136	1.065	1.124		1.043	1.135	1.11	1.064	1.142	1.089	1.042	1.11	1.046
									1.052	1.109	1.096	1.005	1.025	1.025	1.021	1.058	1.117	1.045	1.133	1.178	1.063	1.144	1.092	1.043	1.109	1.045				1.063	1.141	1.171	1.033	1.059	1.138	1.066	1.128		1.042	1.135	1.115	1.063	1.144	1.092	1.043	1.109	1.045
									1.053	1.109	1.093	1.006	1.026	1.026	1.023	1.06	1.12	1.048	1.134	1.18	1.064	1.145	1.093	1.045	1.105	1.044				1.063	1.144	1.173	1.036	1.061	1.14	1.069	1.133		1.041	1.138	1.116	1.064	1.145	1.093	1.045	1.105	1.044
									1.054	1.11	1.09	1.009	1.027	1.027	1.025	1.062	1.118	1.047	1.135	1.18	1.065	1.146	1.094	1.047	1.101	1.044				1.063	1.146	1.175	1.035	1.062	1.144	1.07	1.138		1.041	1.141	1.117	1.065	1.146	1.094	1.047	1.101	1.044
									1.056	1.108	1.086	1.009	1.026	1.026	1.026	1.064	1.12	1.048	1.136	1.186	1.066	1.146	1.095	1.047	1.1	1.043				1.062	1.148	1.177	1.036	1.065	1.148	1.071	1.141		1.041	1.143	1.119	1.066	1.146	1.095	1.047	1.1	1.043
									1.055	1.105	1.082	1.012	1.026	1.026	1.028	1.066	1.12	1.051	1.138	1.19	1.068	1.148	1.096	1.047	1.097	1.042				1.063	1.151	1.178	1.036	1.065	1.152	1.074	1.144		1.041	1.145	1.123	1.068	1.148	1.096	1.047	1.097	1.042
									1.058	1.101	1.077	1.013	1.028	1.028	1.029	1.067	1.122	1.051	1.14	1.194	1.068	1.149	1.098	1.049	1.093	1.044				1.065	1.152	1.18	1.036	1.063	1.154	1.074	1.145		1.041	1.146	1.125	1.068	1.149	1.098	1.049	1.093	1.044
									1.059	1.101	1.073	1.012	1.03	1.03	1.029	1.069	1.125	1.054	1.141	1.195	1.069	1.151	1.099	1.048	1.088	1.045				1.068	1.153	1.182	1.035	1.065	1.155	1.075	1.147		1.042	1.147	1.129	1.069	1.151	1.099	1.048	1.088	1.045
									1.061	1.098	1.07	1.013	1.031	1.031	1.029	1.071	1.128	1.055	1.144	1.198	1.069	1.153	1.102	1.048	1.084	1.046				1.072	1.155	1.183	1.034	1.068	1.158	1.078	1.149		1.045	1.148	1.131	1.069	1.153	1.102	1.048	1.084	1.046
								5	1.062	1.095	1.067	1.013	1.032	1.032	1.031	1.072	1.13	1.055	1.147	1.199	1.07	1.155	1.105	1.048	1.079	1.047			5	1.073	1.158	1.186	1.037	1.069	1.161	1.08	1.151		1.044	1.151	1.135	1.07	1.155	1.105	1.048	1.079	1.047
									1.064	1.091	1.066	1.011	1.033	1.033	1.032	1.075	1.132	1.058	1.149	1.202	1.071	1.156	1.108	1.048	1.075	1.049				1.075	1.159	1.188	1.039	1.07	1.164	1.083	1.153		1.043	1.153	1.138	1.071	1.156	1.108	1.048	1.075	1.049
									1.068	1.088	1.064	1.012	1.033	1.033	1.031	1.076	1.133	1.06	1.151	1.205	1.072	1.157	1.111	1.049	1.073	1.051				1.078	1.16	1.191	1.043	1.07	1.164	1.084	1.155		1.045	1.154	1.14	1.072	1.157	1.111	1.049	1.073	1.051
									1.07	1.08	1.063	1.011	1.035	1.035	1.032	1.076	1.135	1.062	1.153	1.206	1.073	1.158	1.112	1.048	1.07	1.055				1.079	1.16	1.193	1.043	1.071	1.164	1.085	1.158		1.047	1.157	1.143	1.073	1.158	1.112	1.048	1.07	1.055
									1.07	1.077	1.063	1.013	1.035	1.035	1.032	1.076	1.136	1.063	1.157	1.209	1.073	1.161	1.113	1.05	1.067	1.058				1.081	1.161	1.195	1.044	1.071	1.164	1.087	1.16		1.049	1.158	1.143	1.073	1.161	1.113	1.05	1.067	1.058
									1.071	1.07	1.063	1.015	1.038	1.038	1.033	1.075	1.136	1.063	1.159	1.212	1.075	1.162	1.116	1.047	1.064	1.063				1.083	1.163	1.197	1.046	1.073	1.163	1.089	1.163		1.05	1.16	1.148	1.075	1.162	1.116	1.047	1.064	1.063
									1.071	1.064	1.063	1.014	1.039	1.039	1.034	1.075	1.139	1.065	1.16	1.213	1.077	1.164	1.118	1.044	1.061	1.068				1.086	1.166	1.198	1.047	1.075	1.164	1.09	1.163		1.053	1.16	1.149	1.077	1.164	1.118	1.044	1.061	1.068
									1.073	1.06	1.062	1.015	1.04	1.04	1.035	1.076	1.141	1.065	1.164	1.215	1.078	1.165	1.118	1.039	1.058	1.074				1.087	1.169	1.2	1.05	1.078	1.166	1.093	1.164		1.054	1.162	1.152	1.078	1.165	1.118	1.039	1.058	1.074
									1.072	1.054	1.062	1.015	1.039	1.039	1.034	1.08	1.143	1.065	1.166	1.217	1.079	1.167	1.119	1.036	1.056	1.08				1.088	1.173	1.201	1.05	1.081	1.17	1.094	1.166		1.056	1.165	1.155	1.079	1.167	1.119	1.036	1.056	1.08
									1.072	1.05	1.062	1.016	1.039	1.039	1.036	1.08	1.146	1.067	1.167	1.218	1.078	1.168	1.121	1.031	1.055	1.086				1.089	1.173	1.203	1.051	1.083	1.173	1.095	1.165		1.056	1.167	1.157	1.078	1.168	1.121	1.031	1.055	1.086
									1.071	1.046	1.064	1.018	1.039	1.039	1.035	1.079	1.148	1.069	1.17	1.22	1.08	1.17	1.122	1.024	1.054	1.091				1.09	1.175	1.203	1.054	1.087	1.177	1.1	1.169		1.056	1.168	1.16	1.08	1.17	1.122	1.024	1.054	1.091
									1.068	1.043	1.065	1.022	1.042	1.042	1.036	1.078	1.149	1.068	1.171	1.223	1.081	1.171	1.125	1.017	1.053	1.095				1.089	1.177	1.205	1.055	1.088	1.18	1.101	1.17		1.058	1.17	1.161	1.081	1.171	1.125	1.017	1.053	1.095
									1.066	1.038	1.065	1.023	1.042	1.042	1.037	1.078	1.153	1.068	1.172	1.225	1.082	1.173	1.125	1.011	1.053	1.101				1.088	1.179	1.207	1.056	1.089	1.184	1.102	1.171		1.059	1.172	1.16	1.082	1.173	1.125	1.011	1.053	1.101
									1.063	1.037	1.068	1.024	1.044	1.044	1.036	1.08	1.155	1.071	1.172	1.229	1.084	1.176	1.127	1.006	1.054	1.105				1.089	1.18	1.208	1.057	1.092	1.187	1.105	1.172		1.06	1.173	1.161	1.084	1.176	1.127	1.006	1.054	1.105
									1.06	1.037	1.071	1.024	1.046	1.046	1.04	1.08	1.158	1.071	1.171	1.228	1.086	1.178	1.128	1	1.054	1.112				1.091	1.183	1.209	1.057	1.094	1.189	1.107	1.174		1.062	1.174	1.165	1.086	1.178	1.128	1	1.054	1.112
									1.056	1.038	1.074	1.025	1.047	1.047	1.043	1.081	1.159	1.072	1.172	1.229	1.087	1.179	1.132	0.996	1.055	1.121				1.093	1.186	1.212	1.059	1.096	1.19	1.11	1.179		1.065	1.176	1.168	1.087	1.179	1.132	0.996	1.055	1.121
									1.054	1.037	1.076	1.026	1.046	1.046	1.043	1.082	1.157	1.074	1.173	1.233	1.088	1.181	1.135	0.992	1.056	1.127				1.096	1.188	1.214	1.057	1.096	1.192	1.113	1.182		1.065	1.177	1.168	1.088	1.181	1.135	0.992	1.056	1.127
									1.049	1.035	1.079	1.027	1.046	1.046	1.043	1.082	1.157	1.075	1.174	1.234	1.089	1.183	1.135	0.991	1.058	1.133				1.097	1.188	1.218	1.057	1.097	1.194	1.116	1.184		1.067	1.177	1.167	1.089	1.183	1.135	0.991	1.058	1.133
									1.048	1.035	1.084	1.026	1.045	1.045	1.042	1.082	1.157	1.078	1.176	1.236	1.09	1.184	1.137	0.99	1.06	1.139				1.099	1.189	1.219	1.056	1.098	1.197	1.118	1.186		1.069	1.177	1.171	1.09	1.184	1.137	0.99	1.06	1.139
									1.045	1.036	1.088	1.029	1.046	1.046	1.04	1.083	1.157	1.079	1.176	1.236	1.09	1.185	1.139	0.989	1.061	1.147				1.1	1.19	1.221	1.056	1.1	1.199	1.117	1.186		1.07	1.176	1.171	1.09	1.185	1.139	0.989	1.061	1.147
									1.042	1.035	1.09	1.03	1.048	1.048	1.039	1.085	1.162	1.08	1.179	1.236	1.091	1.185	1.141	0.988	1.063	1.152				1.101	1.191	1.221	1.056	1.099	1.2	1.117	1.19		1.072	1.176	1.174	1.091	1.185	1.141	0.988	1.063	1.152
								6	1.04	1.036	1.095	1.031	1.049	1.049	1.04	1.086	1.164	1.082	1.179	1.24	1.093	1.187	1.141	0.985	1.065	1.158			6	1.103	1.193	1.222	1.056	1.099	1.203	1.117	1.192		1.073	1.177	1.177	1.093	1.187	1.141	0.985	1.065	1.158
									1.039	1.038	1.1	1.03	1.049	1.049	1.041	1.088	1.163	1.082	1.178	1.242	1.093	1.187	1.144	0.984	1.067	1.163				1.102	1.194	1.224	1.057	1.099	1.203	1.12	1.194		1.075	1.176	1.179	1.093	1.187	1.144	0.984	1.067	1.163
									1.035	1.04	1.104	1.03	1.052	1.052	1.043	1.089	1.166	1.083	1.18	1.245	1.095	1.188	1.147	0.981	1.069	1.169				1.103	1.194	1.226	1.056	1.1	1.202	1.12	1.193		1.077	1.176	1.182	1.095	1.188	1.147	0.981	1.069	1.169
									1.031	1.041	1.109	1.03	1.057	1.057	1.045	1.089	1.166	1.08	1.181	1.247	1.096	1.189	1.148	0.98	1.072	1.174				1.102	1.197	1.227	1.055	1.099	1.204	1.121	1.195		1.078	1.175	1.184	1.096	1.189	1.148	0.98	1.072	1.174
									1.028	1.044	1.115	1.03	1.059	1.059	1.045	1.09	1.167	1.079	1.182	1.25	1.096	1.189	1.15	0.979	1.073	1.179				1.102	1.199	1.229	1.056	1.099	1.206	1.123	1.195		1.08	1.176	1.183	1.096	1.189	1.15	0.979	1.073	1.179
									1.026	1.046	1.119	1.032	1.061	1.061	1.044	1.092	1.17	1.079	1.182	1.252	1.096	1.191	1.152	0.977	1.075	1.185				1.101	1.201	1.232	1.056	1.101	1.209	1.123	1.198		1.081	1.177	1.183	1.096	1.191	1.152	0.977	1.075	1.185
									1.023	1.05	1.125	1.034	1.064	1.064	1.044	1.093	1.17	1.079	1.182	1.256	1.095	1.191	1.153	0.976	1.078	1.191				1.102	1.203	1.235	1.054	1.101	1.212	1.122	1.197		1.082	1.179	1.184	1.095	1.191	1.153	0.976	1.078	1.191
									1.02	1.054	1.131	1.036	1.063	1.063	1.045	1.095	1.171	1.081	1.183	1.257	1.096	1.193	1.155	0.974	1.081	1.198				1.101	1.206	1.238	1.053	1.101	1.211	1.123	1.198		1.083	1.182	1.184	1.096	1.193	1.155	0.974	1.081	1.198
									1.018	1.057	1.135	1.035	1.062	1.062	1.045	1.095	1.172	1.082	1.184	1.259	1.098	1.194	1.157	0.973	1.083	1.206				1.102	1.207	1.239	1.054	1.104	1.213	1.123	1.201		1.085	1.184	1.185	1.098	1.194	1.157	0.973	1.083	1.206
									1.015	1.059	1.141	1.035	1.063	1.063	1.045	1.097	1.173	1.083	1.183	1.261	1.099	1.195	1.158	0.972	1.085	1.213				1.104	1.211	1.241	1.054	1.103	1.213	1.122	1.203		1.085	1.187	1.184	1.099	1.195	1.158	0.972	1.085	1.213
									1.013	1.061	1.147	1.034	1.063	1.063	1.048	1.097	1.174	1.081	1.185	1.262	1.099	1.196	1.162	0.973	1.088	1.22				1.104	1.213	1.243	1.054	1.106	1.215	1.124	1.205		1.087	1.189	1.185	1.099	1.196	1.162	0.973	1.088	1.22
									1.01	1.063	1.151	1.035	1.064	1.064	1.048	1.097	1.174	1.08	1.185	1.263	1.101	1.198	1.164	0.972	1.09	1.226				1.105	1.214	1.245	1.055	1.105	1.216	1.126	1.205		1.089	1.189	1.188	1.101	1.198	1.164	0.972	1.09	1.226
									1.008	1.066	1.154	1.035	1.062	1.062	1.047	1.097	1.175	1.08	1.187	1.265	1.102	1.199	1.165	0.972	1.094	1.233				1.104	1.213	1.248	1.055	1.105	1.216	1.126	1.205		1.089	1.189	1.19	1.102	1.199	1.165	0.972	1.094	1.233
									1.006	1.069	1.158	1.035	1.061	1.061	1.047	1.098	1.175	1.082	1.188	1.266	1.103	1.199	1.169	0.972	1.097	1.239				1.104	1.216	1.25	1.057	1.105	1.216	1.129	1.207		1.089	1.19	1.192	1.103	1.199	1.169	0.972	1.097	1.239
									1.004	1.074	1.162	1.033	1.062	1.062	1.048	1.099	1.174	1.084	1.189	1.267	1.106	1.2	1.171	0.973	1.101	1.247				1.105	1.218	1.252	1.059	1.105	1.218	1.13	1.21		1.088	1.192	1.193	1.106	1.2	1.171	0.973	1.101	1.247
									1.003	1.078	1.167	1.032	1.063	1.063	1.048	1.099	1.177	1.084	1.191	1.268	1.106	1.201	1.173	0.973	1.106	1.253				1.104	1.22	1.253	1.06	1.105	1.221	1.128	1.211		1.086	1.194	1.195	1.106	1.201	1.173	0.973	1.106	1.253
									1.002	1.082	1.172	1.032	1.063	1.063	1.047	1.102	1.18	1.086	1.192	1.271	1.107	1.202	1.174	0.973	1.111	1.259				1.104	1.223	1.254	1.06	1.103	1.224	1.13	1.211		1.085	1.196	1.195	1.107	1.202	1.174	0.973	1.111	1.259
									0.999	1.086	1.176	1.029	1.062	1.062	1.048	1.104	1.182	1.087	1.195	1.273	1.108	1.203	1.177	0.973	1.114	1.265				1.105	1.225	1.254	1.062	1.103	1.224	1.13	1.209		1.085	1.195	1.198	1.108	1.203	1.177	0.973	1.114	1.265
									0.999	1.089	1.18	1.028	1.066	1.066	1.046	1.104	1.183	1.089	1.196	1.276	1.109	1.205	1.179	0.973	1.119	1.273				1.103	1.224	1.254	1.061	1.106	1.227	1.132	1.212		1.085	1.197	1.201	1.109	1.205	1.179	0.973	1.119	1.273
									0.998	1.092	1.186	1.028	1.068	1.068	1.047	1.104	1.185	1.09	1.198	1.279	1.109	1.206	1.183	0.973	1.122	1.28				1.105	1.226	1.254	1.062	1.108	1.227	1.134	1.215		1.085	1.198	1.204	1.109	1.206	1.183	0.973	1.122	1.28
									0.997	1.096	1.189	1.029	1.069	1.069	1.045	1.104	1.188	1.09	1.2	1.28	1.11	1.208	1.184	0.976	1.124	1.287				1.106	1.228	1.254	1.063	1.111	1.227	1.135	1.217		1.086	1.2	1.205	1.11	1.208	1.184	0.976	1.124	1.287
								7	0.996	1.1	1.195	1.028	1.069	1.069	1.045	1.105	1.19	1.091	1.203	1.281	1.111	1.208	1.186	0.977	1.129	1.293			7	1.107	1.231	1.256	1.064	1.112	1.229	1.135	1.219		1.086	1.2	1.207	1.111	1.208	1.186	0.977	1.129	1.293
									0.997	1.104	1.2	1.027	1.073	1.073	1.045	1.107	1.188	1.09	1.204	1.282	1.111	1.21	1.188	0.977	1.132	1.301				1.108	1.233	1.256	1.065	1.114	1.229	1.136	1.219		1.088	1.199	1.209	1.111	1.21	1.188	0.977	1.132	1.301
									0.997	1.107	1.207	1.028	1.075	1.075	1.045	1.11	1.188	1.091	1.206	1.284	1.112	1.211	1.191	0.979	1.137	1.306				1.108	1.238	1.258	1.065	1.117	1.229	1.136	1.22		1.091	1.201	1.211	1.112	1.211	1.191	0.979	1.137	1.306
									0.997	1.11	1.213	1.029	1.076	1.076	1.047	1.109	1.189	1.092	1.205	1.286	1.112	1.213	1.192	0.981	1.142	1.312				1.109	1.241	1.26	1.065	1.119	1.228	1.136	1.222		1.091	1.204	1.212	1.112	1.213	1.192	0.981	1.142	1.312
									0.996	1.114	1.217	1.029	1.077	1.077	1.047	1.109	1.189	1.093	1.207	1.287	1.113	1.214	1.194	0.982	1.147	1.316				1.11	1.242	1.26	1.067	1.12	1.229	1.136	1.222		1.095	1.206	1.214	1.113	1.214	1.194	0.982	1.147	1.316
									0.995	1.118	1.224	1.029	1.078	1.078	1.047	1.111	1.191	1.094	1.209	1.288	1.114	1.216	1.197	0.984	1.15	1.319				1.113	1.245	1.262	1.065	1.12	1.231	1.137	1.223		1.097	1.207	1.217	1.114	1.216	1.197	0.984	1.15	1.319
									0.995	1.122	1.231	1.03	1.081	1.081	1.046	1.112	1.194	1.095	1.21	1.289	1.115	1.216	1.199	0.986	1.153	1.322				1.113	1.245	1.265	1.064	1.121	1.234	1.139	1.223		1.097	1.207	1.22	1.115	1.216	1.199	0.986	1.153	1.322
									0.995	1.127	1.238	1.028	1.081	1.081	1.047	1.114	1.195	1.096	1.212	1.292	1.116	1.217	1.202	0.986	1.155	1.323				1.114	1.246	1.264	1.065	1.124	1.235	1.141	1.225		1.097	1.206	1.22	1.116	1.217	1.202	0.986	1.155	1.323
									0.995	1.132	1.244	1.027	1.08	1.08	1.052	1.115	1.199	1.097	1.213	1.293	1.117	1.218	1.205	0.988	1.158	1.326				1.112	1.248	1.266	1.065	1.123	1.235	1.142	1.227		1.099	1.207	1.22	1.117	1.218	1.205	0.988	1.158	1.326
									0.995	1.136	1.25	1.027	1.08	1.08	1.05	1.117	1.201	1.095	1.213	1.293	1.119	1.218	1.207	0.988	1.163	1.323				1.111	1.252	1.267	1.065	1.124	1.236	1.144	1.227		1.099	1.206	1.221	1.119	1.218	1.207	0.988	1.163	1.323
									0.997	1.139	1.255	1.027	1.08	1.08	1.05	1.119	1.205	1.096	1.212	1.296	1.119	1.219	1.207	0.99	1.167	1.308				1.111	1.251	1.269	1.065	1.125	1.236	1.146	1.227		1.099	1.207	1.223	1.119	1.219	1.207	0.99	1.167	1.308
									0.998	1.142	1.262	1.03	1.082	1.082	1.048	1.117	1.209	1.098	1.213	1.299	1.121	1.221	1.209	0.992	1.17	1.289				1.11	1.251	1.271	1.066	1.126	1.236	1.146	1.228		1.1	1.208	1.225	1.121	1.221	1.209	0.992	1.17	1.289
									1.001	1.146	1.268	1.031	1.084	1.084	1.049	1.121	1.214	1.097	1.215	1.302	1.122	1.221	1.21	0.995	1.174	1.272				1.112	1.251	1.273	1.066	1.129	1.235	1.147	1.228		1.102	1.208	1.227	1.122	1.221	1.21	0.995	1.174	1.272
									1.002	1.151	1.274	1.03	1.084	1.084	1.051	1.122	1.218	1.096	1.218	1.304	1.123	1.222	1.213	0.999	1.177	1.258				1.11	1.251	1.275	1.067	1.131	1.236	1.147	1.229		1.103	1.209	1.23	1.123	1.222	1.213	0.999	1.177	1.258
									1.003	1.155	1.279	1.029	1.085	1.085	1.053	1.122	1.218	1.097	1.217	1.305	1.126	1.223	1.215	1.002	1.18	1.247				1.111	1.254	1.277	1.07	1.134	1.24	1.148	1.23		1.104	1.211	1.23	1.126	1.223	1.215	1.002	1.18	1.247
									1.006	1.159	1.286	1.029	1.086	1.086	1.055	1.123	1.218	1.097	1.217	1.309	1.127	1.224	1.218	1.005	1.182	1.237				1.111	1.256	1.279	1.071	1.135	1.241	1.152	1.232		1.105	1.212	1.232	1.127	1.224	1.218	1.005	1.182	1.237
									1.007	1.161	1.293	1.028	1.085	1.085	1.055	1.123	1.219	1.098	1.217	1.309	1.129	1.225	1.219	1.008	1.187	1.228				1.111	1.258	1.281	1.072	1.136	1.242	1.155	1.232		1.106	1.213	1.235	1.129	1.225	1.219	1.008	1.187	1.228
									1.009	1.165	1.298	1.029	1.086	1.086	1.056	1.122	1.22	1.099	1.218	1.312	1.13	1.226	1.22	1.009	1.189	1.22				1.112	1.258	1.283	1.074	1.138	1.243	1.156	1.233		1.105	1.213	1.236	1.13	1.226	1.22	1.009	1.189	1.22
									1.011	1.168	1.301	1.029	1.088	1.088	1.056	1.12	1.22	1.099	1.219	1.315	1.132	1.227	1.222	1.01	1.191	1.212				1.113	1.258	1.284	1.073	1.14	1.243	1.157	1.234		1.104	1.212	1.236	1.132	1.227	1.222	1.01	1.191	1.212
									1.012	1.172	1.307	1.032	1.09	1.09	1.053	1.12	1.22	1.101	1.22	1.319	1.133	1.227	1.223	1.013	1.194	1.207				1.115	1.261	1.286	1.077	1.141	1.244	1.158	1.236		1.103	1.213	1.237	1.133	1.227	1.223	1.013	1.194	1.207
									1.016	1.179	1.313	1.033	1.091	1.091	1.053	1.121	1.221	1.102	1.22	1.323	1.135	1.228	1.223	1.013	1.196	1.202				1.119	1.261	1.286	1.079	1.143	1.245	1.158	1.239		1.102	1.217	1.237	1.135	1.228	1.223	1.013	1.196	1.202
								8	1.017	1.185	1.317	1.033	1.093	1.093	1.052	1.12	1.219	1.104	1.219	1.325	1.137	1.229	1.223	1.016	1.197	1.197			8	1.119	1.262	1.288	1.082	1.143	1.246	1.16	1.241		1.103	1.218	1.235	1.137	1.229	1.223	1.016	1.197	1.197
									1.019	1.191	1.322	1.034	1.094	1.094	1.053	1.123	1.221	1.102	1.218	1.327	1.138	1.23	1.224	1.018	1.197	1.194				1.121	1.261	1.291	1.082	1.146	1.247	1.16	1.242		1.105	1.22	1.238	1.138	1.23	1.224	1.018	1.197	1.194
									1.023	1.198	1.326	1.035	1.099	1.099	1.054	1.127	1.222	1.101	1.219	1.329	1.139	1.23	1.224	1.02	1.198	1.191				1.122	1.261	1.291	1.081	1.147	1.25	1.161	1.245		1.107	1.221	1.237	1.139	1.23	1.224	1.02	1.198	1.191
									1.025	1.205	1.33	1.036	1.099	1.099	1.054	1.131	1.223	1.101	1.218	1.33	1.139	1.231	1.224	1.021	1.199	1.186				1.123	1.261	1.292	1.083	1.148	1.25	1.163	1.245		1.107	1.222	1.237	1.139	1.231	1.224	1.021	1.199	1.186
									1.028	1.211	1.334	1.037	1.099	1.099	1.056	1.135	1.224	1.101	1.218	1.329	1.141	1.231	1.225	1.024	1.199	1.183				1.121	1.262	1.295	1.082	1.15	1.252	1.163	1.247		1.108	1.221	1.239	1.141	1.231	1.225	1.024	1.199	1.183
									1.03	1.22	1.338	1.038	1.098	1.098	1.057	1.14	1.226	1.101	1.218	1.331	1.143	1.232	1.227	1.026	1.198	1.178				1.12	1.261	1.295	1.083	1.151	1.253	1.163	1.246		1.111	1.222	1.24	1.143	1.232	1.227	1.026	1.198	1.178
									1.032	1.224	1.343	1.039	1.096	1.096	1.056	1.142	1.227	1.101	1.218	1.332	1.144	1.232	1.228	1.028	1.197	1.176				1.12	1.263	1.295	1.083	1.151	1.255	1.164	1.246		1.11	1.223	1.243	1.144	1.232	1.228	1.028	1.197	1.176
									1.033	1.229	1.346	1.043	1.098	1.098	1.057	1.143	1.228	1.103	1.22	1.335	1.145	1.233	1.232	1.031	1.197	1.173				1.123	1.265	1.295	1.083	1.152	1.259	1.164	1.247		1.112	1.224	1.243	1.145	1.233	1.232	1.031	1.197	1.173
									1.035	1.232	1.351	1.044	1.099	1.099	1.059	1.143	1.23	1.103	1.221	1.337	1.146	1.234	1.233	1.033	1.195	1.168				1.122	1.266	1.296	1.085	1.152	1.263	1.164	1.247		1.111	1.226	1.245	1.146	1.234	1.233	1.033	1.195	1.168
									1.038	1.238	1.356	1.047	1.1	1.1	1.06	1.141	1.229	1.105	1.222	1.339	1.147	1.236	1.234	1.037	1.193	1.164				1.122	1.267	1.296	1.085	1.152	1.263	1.165	1.248		1.11	1.226	1.247	1.147	1.236	1.234	1.037	1.193	1.164
									1.042	1.243	1.36	1.048	1.101	1.101	1.061	1.14	1.23	1.107	1.224	1.341	1.149	1.236	1.234	1.041	1.191	1.163				1.123	1.269	1.296	1.086	1.152	1.263	1.166	1.253		1.11	1.225	1.247	1.149	1.236	1.234	1.041	1.191	1.163
									1.045	1.247	1.364	1.048	1.099	1.099	1.06	1.139	1.229	1.107	1.226	1.343	1.15	1.237	1.235	1.044	1.186	1.16				1.125	1.271	1.298	1.087	1.153	1.264	1.166	1.255		1.112	1.226	1.247	1.15	1.237	1.235	1.044	1.186	1.16
									1.048	1.251	1.369	1.047	1.099	1.099	1.063	1.137	1.231	1.107	1.228	1.344	1.151	1.239	1.235	1.048	1.184	1.156				1.126	1.271	1.298	1.087	1.155	1.267	1.167	1.256		1.114	1.229	1.248	1.151	1.239	1.235	1.048	1.184	1.156
									1.05	1.255	1.372	1.049	1.1	1.1	1.063	1.137	1.232	1.107	1.229	1.345	1.151	1.239	1.235	1.05	1.181	1.154				1.128	1.273	1.298	1.089	1.155	1.267	1.169	1.259		1.115	1.23	1.249	1.151	1.239	1.235	1.05	1.181	1.154
									1.051	1.26	1.373	1.049	1.104	1.104	1.061	1.137	1.233	1.107	1.23	1.346	1.151	1.24	1.237	1.054	1.18	1.155				1.13	1.274	1.3	1.09	1.155	1.268	1.168	1.261		1.115	1.228	1.25	1.151	1.24	1.237	1.054	1.18	1.155
									1.054	1.265	1.374	1.051	1.103	1.103	1.063	1.136	1.234	1.107	1.232	1.348	1.152	1.24	1.24	1.057	1.176	1.155				1.133	1.275	1.299	1.091	1.155	1.269	1.167	1.262		1.115	1.23	1.25	1.152	1.24	1.24	1.057	1.176	1.155
									1.055	1.27	1.375	1.052	1.105	1.105	1.063	1.135	1.237	1.106	1.233	1.347	1.153	1.24	1.24	1.059	1.171	1.154				1.133	1.276	1.299	1.09	1.154	1.27	1.167	1.264		1.116	1.23	1.252	1.153	1.24	1.24	1.059	1.171	1.154
									1.057	1.273	1.376	1.055	1.107	1.107	1.064	1.135	1.238	1.107	1.233	1.35	1.155	1.241	1.241	1.062	1.168	1.155				1.134	1.276	1.3	1.089	1.154	1.273	1.166	1.267		1.116	1.232	1.251	1.155	1.241	1.241	1.062	1.168	1.155
									1.06	1.277	1.379	1.057	1.111	1.111	1.064	1.136	1.239	1.108	1.234	1.352	1.156	1.241	1.241	1.066	1.164	1.156				1.136	1.278	1.301	1.089	1.157	1.275	1.167	1.269		1.116	1.233	1.251	1.156	1.241	1.241	1.066	1.164	1.156
									1.061	1.279	1.382	1.058	1.114	1.114	1.066	1.136	1.239	1.108	1.234	1.354	1.157	1.241	1.243	1.068	1.161	1.157				1.138	1.277	1.303	1.09	1.158	1.275	1.167	1.272		1.116	1.233	1.253	1.157	1.241	1.243	1.068	1.161	1.157
									1.064	1.286	1.384	1.059	1.116	1.116	1.066	1.137	1.241	1.11	1.238	1.354	1.157	1.241	1.243	1.071	1.156	1.159				1.14	1.278	1.305	1.091	1.156	1.276	1.165	1.274		1.118	1.235	1.254	1.157	1.241	1.243	1.071	1.156	1.159
								9	1.065	1.289	1.385	1.06	1.118	1.118	1.067	1.138	1.242	1.11	1.242	1.355	1.158	1.243	1.243	1.073	1.151	1.16			9	1.141	1.281	1.306	1.091	1.156	1.277	1.167	1.275		1.118	1.237	1.254	1.158	1.243	1.243	1.073	1.151	1.16
									1.066	1.295	1.386	1.06	1.119	1.119	1.067	1.137	1.243	1.111	1.244	1.356	1.16	1.244	1.244	1.074	1.145	1.161				1.143	1.283	1.307	1.093	1.156	1.279	1.167	1.277		1.118	1.237	1.258	1.16	1.244	1.244	1.074	1.145	1.161
									1.068	1.301	1.388	1.061	1.119	1.119	1.07	1.139	1.245	1.113	1.248	1.356	1.161	1.244	1.245	1.075	1.139	1.165				1.143	1.284	1.307	1.093	1.159	1.28	1.169	1.279		1.12	1.238	1.26	1.161	1.244	1.245	1.075	1.139	1.165
									1.071	1.306	1.389	1.061	1.12	1.12	1.073	1.142	1.246	1.114	1.249	1.356	1.161	1.245	1.245	1.077	1.133	1.165				1.145	1.286	1.308	1.094	1.16	1.282	1.17	1.283		1.122	1.24	1.264	1.161	1.245	1.245	1.077	1.133	1.165
									1.073	1.311	1.391	1.06	1.12	1.12	1.071	1.145	1.248	1.117	1.25	1.356	1.163	1.245	1.245	1.078	1.127	1.166				1.146	1.289	1.308	1.095	1.163	1.286	1.171	1.285		1.123	1.241	1.265	1.163	1.245	1.245	1.078	1.127	1.166
									1.073	1.313	1.392	1.061	1.12	1.12	1.071	1.149	1.252	1.119	1.254	1.356	1.165	1.245	1.246	1.077	1.119	1.167				1.148	1.29	1.309	1.098	1.166	1.288	1.172	1.286		1.124	1.242	1.27	1.165	1.245	1.246	1.077	1.119	1.167
									1.075	1.317	1.393	1.063	1.124	1.124	1.072	1.151	1.251	1.12	1.254	1.357	1.165	1.246	1.246	1.079	1.112	1.169				1.149	1.292	1.309	1.099	1.168	1.29	1.173	1.289		1.124	1.242	1.269	1.165	1.246	1.246	1.079	1.112	1.169
									1.076	1.32	1.393	1.064	1.123	1.123	1.075	1.152	1.253	1.121	1.256	1.359	1.166	1.247	1.247	1.08	1.106	1.173				1.151	1.293	1.311	1.1	1.168	1.29	1.174	1.29		1.126	1.243	1.269	1.166	1.247	1.247	1.08	1.106	1.173
									1.078	1.324	1.392	1.065	1.124	1.124	1.077	1.152	1.255	1.122	1.259	1.361	1.167	1.247	1.248	1.079	1.102	1.178				1.153	1.294	1.312	1.102	1.168	1.291	1.175	1.292		1.125	1.244	1.27	1.167	1.247	1.248	1.079	1.102	1.178
									1.081	1.327	1.392	1.067	1.124	1.124	1.076	1.153	1.257	1.121	1.26	1.362	1.168	1.248	1.25	1.079	1.098	1.18				1.155	1.295	1.312	1.101	1.169	1.291	1.175	1.293		1.124	1.247	1.271	1.168	1.248	1.25	1.079	1.098	1.18
									1.083	1.331	1.393	1.067	1.123	1.123	1.075	1.155	1.26	1.12	1.26	1.364	1.169	1.248	1.252	1.078	1.093	1.185				1.156	1.296	1.311	1.102	1.169	1.293	1.177	1.297		1.126	1.249	1.271	1.169	1.248	1.252	1.078	1.093	1.185
									1.086	1.336	1.394	1.068	1.125	1.125	1.078	1.155	1.263	1.119	1.259	1.364	1.171	1.247	1.255	1.078	1.091	1.19				1.156	1.3	1.312	1.102	1.172	1.294	1.177	1.297		1.128	1.252	1.274	1.171	1.247	1.255	1.078	1.091	1.19
									1.088	1.34	1.392	1.071	1.125	1.125	1.082	1.157	1.263	1.12	1.258	1.363	1.172	1.248	1.257	1.078	1.088	1.193				1.158	1.301	1.312	1.104	1.172	1.298	1.177	1.298		1.129	1.256	1.273	1.172	1.248	1.257	1.078	1.088	1.193
									1.092	1.344	1.391	1.071	1.125	1.125	1.086	1.159	1.266	1.119	1.258	1.363	1.171	1.249	1.259	1.079	1.086	1.198				1.157	1.304	1.313	1.103	1.172	1.3	1.178	1.301		1.129	1.258	1.275	1.171	1.249	1.259	1.079	1.086	1.198
									1.094	1.348	1.391	1.072	1.127	1.127	1.088	1.163	1.268	1.12	1.259	1.361	1.172	1.25	1.26	1.081	1.086	1.202				1.159	1.306	1.314	1.103	1.174	1.302	1.181	1.306		1.13	1.259	1.277	1.172	1.25	1.26	1.081	1.086	1.202
									1.097	1.353	1.39	1.076	1.126	1.126	1.088	1.166	1.27	1.122	1.258	1.361	1.172	1.25	1.261	1.082	1.084	1.207				1.161	1.307	1.316	1.103	1.176	1.301	1.183	1.307		1.131	1.259	1.279	1.172	1.25	1.261	1.082	1.084	1.207
									1.099	1.36	1.391	1.076	1.126	1.126	1.088	1.166	1.271	1.122	1.261	1.36	1.173	1.25	1.261	1.083	1.083	1.213				1.163	1.309	1.317	1.103	1.18	1.303	1.186	1.309		1.134	1.259	1.281	1.173	1.25	1.261	1.083	1.083	1.213
									1.102	1.364	1.389	1.078	1.127	1.127	1.088	1.169	1.273	1.122	1.261	1.361	1.174	1.249	1.259	1.084	1.084	1.219				1.166	1.31	1.317	1.105	1.18	1.303	1.187	1.312		1.135	1.259	1.28	1.174	1.249	1.259	1.084	1.084	1.219
									1.105	1.37	1.39	1.08	1.127	1.127	1.089	1.172	1.273	1.122	1.263	1.36	1.175	1.249	1.262	1.083	1.084	1.225				1.167	1.311	1.318	1.105	1.184	1.305	1.189	1.316		1.136	1.26	1.279	1.175	1.249	1.262	1.083	1.084	1.225
									1.107	1.375	1.391	1.08	1.128	1.128	1.09	1.177	1.274	1.123	1.264	1.361	1.176	1.248	1.262	1.083	1.086	1.229				1.17	1.315	1.317	1.106	1.189	1.305	1.191	1.318		1.137	1.262	1.278	1.176	1.248	1.262	1.083	1.086	1.229
									1.11	1.379	1.391	1.083	1.132	1.132	1.091	1.18	1.274	1.125	1.265	1.363	1.176	1.248	1.263	1.082	1.087	1.236				1.173	1.316	1.317	1.108	1.191	1.308	1.191	1.319		1.136	1.263	1.278	1.176	1.248	1.263	1.082	1.087	1.236
								10	1.115	1.385	1.39	1.083	1.136	1.136	1.092	1.182	1.275	1.124	1.265	1.363	1.178	1.249	1.264	1.082	1.09	1.242			10	1.174	1.318	1.317	1.109	1.194	1.31	1.191	1.32		1.135	1.264	1.279	1.178	1.249	1.264	1.082	1.09	1.242
									1.117	1.388	1.39	1.082	1.136	1.136	1.092	1.184	1.277	1.123	1.265	1.363	1.179	1.25	1.265	1.081	1.091	1.249				1.179	1.319	1.318	1.11	1.197	1.311	1.192	1.319		1.135	1.265	1.281	1.179	1.25	1.265	1.081	1.091	1.249
									1.12	1.392	1.391	1.083	1.136	1.136	1.093	1.186	1.278	1.123	1.265	1.364	1.179	1.25	1.266	1.078	1.095	1.255				1.18	1.32	1.318	1.111	1.198	1.312	1.195	1.318		1.136	1.264	1.283	1.179	1.25	1.266	1.078	1.095	1.255
									1.123	1.396	1.39	1.083	1.138	1.138	1.094	1.187	1.278	1.127	1.265	1.365	1.18	1.25	1.267	1.077	1.099	1.261				1.18	1.322	1.318	1.113	1.199	1.311	1.196	1.319		1.135	1.264	1.285	1.18	1.25	1.267	1.077	1.099	1.261
									1.125	1.398	1.392	1.081	1.14	1.14	1.096	1.188	1.279	1.13	1.266	1.366	1.181	1.25	1.269	1.073	1.103	1.268				1.181	1.324	1.319	1.113	1.201	1.313	1.2	1.319		1.136	1.264	1.287	1.181	1.25	1.269	1.073	1.103	1.268
									1.127	1.401	1.391	1.081	1.14	1.14	1.097	1.19	1.281	1.132	1.267	1.365	1.181	1.251	1.271	1.07	1.107	1.275				1.183	1.326	1.32	1.114	1.202	1.313	1.202	1.32		1.137	1.263	1.29	1.181	1.251	1.271	1.07	1.107	1.275
									1.128	1.404	1.392	1.081	1.141	1.141	1.096	1.19	1.28	1.133	1.268	1.368	1.183	1.252	1.271	1.065	1.11	1.282				1.185	1.326	1.321	1.115	1.205	1.315	1.204	1.32		1.135	1.262	1.291	1.183	1.252	1.271	1.065	1.11	1.282
									1.132	1.407	1.393	1.082	1.145	1.145	1.098	1.193	1.28	1.133	1.271	1.371	1.184	1.252	1.273	1.063	1.115	1.292				1.184	1.328	1.321	1.117	1.208	1.316	1.206	1.318		1.137	1.262	1.293	1.184	1.252	1.273	1.063	1.115	1.292
									1.134	1.41	1.393	1.082	1.151	1.151	1.097	1.193	1.282	1.134	1.27	1.371	1.184	1.252	1.273	1.061	1.12	1.298				1.184	1.329	1.322	1.117	1.211	1.316	1.208	1.318		1.14	1.262	1.295	1.184	1.252	1.273	1.061	1.12	1.298
									1.136	1.412	1.395	1.082	1.154	1.154	1.099	1.195	1.285	1.136	1.272	1.372	1.184	1.253	1.274	1.058	1.125	1.307				1.186	1.329	1.322	1.118	1.213	1.318	1.207	1.32		1.144	1.26	1.297	1.184	1.253	1.274	1.058	1.125	1.307
									1.138	1.415	1.396	1.083	1.157	1.157	1.099	1.201	1.284	1.137	1.273	1.373	1.186	1.253	1.273	1.056	1.131	1.314				1.188	1.329	1.321	1.119	1.215	1.319	1.208	1.323		1.145	1.26	1.3	1.186	1.253	1.273	1.056	1.131	1.314
									1.142	1.418	1.397	1.084	1.159	1.159	1.104	1.203	1.287	1.138	1.275	1.374	1.188	1.254	1.273	1.055	1.137	1.323				1.19	1.33	1.321	1.12	1.218	1.321	1.209	1.326		1.148	1.26	1.302	1.188	1.254	1.273	1.055	1.137	1.323
									1.146	1.42	1.397	1.084	1.164	1.164	1.106	1.206	1.288	1.139	1.277	1.376	1.188	1.255	1.274	1.056	1.142	1.331				1.189	1.329	1.322	1.122	1.216	1.32	1.211	1.329		1.151	1.259	1.305	1.188	1.255	1.274	1.056	1.142	1.331
									1.149	1.425	1.399	1.085	1.168	1.168	1.107	1.208	1.29	1.14	1.281	1.378	1.189	1.256	1.275	1.056	1.149	1.34				1.191	1.331	1.322	1.122	1.217	1.322	1.211	1.332		1.15	1.259	1.308	1.189	1.256	1.275	1.056	1.149	1.34
									1.153	1.429	1.4	1.086	1.173	1.173	1.109	1.208	1.29	1.145	1.282	1.377	1.188	1.257	1.276	1.057	1.156	1.35				1.192	1.333	1.322	1.123	1.219	1.323	1.211	1.336		1.15	1.26	1.311	1.188	1.257	1.276	1.057	1.156	1.35
									1.157	1.434	1.4	1.088	1.174	1.174	1.109	1.21	1.292	1.149	1.281	1.378	1.19	1.257	1.278	1.058	1.163	1.359				1.194	1.335	1.322	1.123	1.221	1.324	1.212	1.34		1.15	1.26	1.311	1.19	1.257	1.278	1.058	1.163	1.359
									1.159	1.436	1.401	1.088	1.179	1.179	1.107	1.211	1.292	1.15	1.283	1.377	1.192	1.257	1.28	1.06	1.169	1.368				1.194	1.337	1.323	1.125	1.223	1.326	1.213	1.342		1.153	1.26	1.312	1.192	1.257	1.28	1.06	1.169	1.368
									1.163	1.44	1.402	1.09	1.181	1.181	1.109	1.214	1.293	1.15	1.285	1.378	1.193	1.257	1.28	1.063	1.176	1.376				1.196	1.341	1.323	1.125	1.224	1.328	1.215	1.343		1.154	1.26	1.313	1.193	1.257	1.28	1.063	1.176	1.376
									1.167	1.443	1.402	1.093	1.184	1.184	1.11	1.217	1.294	1.149	1.287	1.378	1.195	1.258	1.281	1.067	1.182	1.384				1.197	1.343	1.325	1.127	1.225	1.33	1.217	1.344		1.154	1.259	1.314	1.195	1.258	1.281	1.067	1.182	1.384
									1.169	1.447	1.401	1.095	1.186	1.186	1.113	1.218	1.295	1.148	1.29	1.38	1.196	1.258	1.283	1.068	1.19	1.393				1.198	1.345	1.324	1.127	1.228	1.332	1.219	1.346		1.156	1.26	1.317	1.196	1.258	1.283	1.068	1.19	1.393
									1.173	1.452	1.403	1.096	1.187	1.187	1.115	1.22	1.298	1.15	1.293	1.38	1.196	1.258	1.285	1.073	1.198	1.402				1.201	1.346	1.325	1.127	1.228	1.333	1.221	1.349		1.158	1.259	1.317	1.196	1.258	1.285	1.073	1.198	1.402
								11	1.176	1.456	1.404	1.098	1.188	1.188	1.118	1.222	1.3	1.151	1.296	1.38	1.198	1.259	1.289	1.077	1.206	1.412			11	1.201	1.347	1.326	1.128	1.231	1.332	1.224	1.353		1.159	1.261	1.317	1.198	1.259	1.289	1.077	1.206	1.412
									1.179	1.459	1.406	1.1	1.186	1.186	1.122	1.225	1.302	1.152	1.298	1.382	1.199	1.26	1.29	1.082	1.214	1.421				1.202	1.347	1.326	1.13	1.235	1.333	1.224	1.357		1.159	1.262	1.318	1.199	1.26	1.29	1.082	1.214	1.421
									1.184	1.462	1.407	1.102	1.186	1.186	1.123	1.226	1.302	1.152	1.3	1.383	1.199	1.26	1.292	1.085	1.221	1.43				1.205	1.35	1.327	1.132	1.239	1.336	1.223	1.36		1.159	1.264	1.319	1.199	1.26	1.292	1.085	1.221	1.43
									1.185	1.467	1.407	1.101	1.184	1.184	1.125	1.227	1.305	1.153	1.3	1.383	1.199	1.26	1.291	1.09	1.229	1.437				1.207	1.351	1.327	1.134	1.24	1.337	1.222	1.362		1.16	1.266	1.319	1.199	1.26	1.291	1.09	1.229	1.437
									1.188	1.473	1.409	1.101	1.184	1.184	1.126	1.23	1.306	1.155	1.304	1.384	1.199	1.26	1.292	1.095	1.239	1.443				1.208	1.354	1.327	1.137	1.24	1.339	1.222	1.365		1.162	1.266	1.32	1.199	1.26	1.292	1.095	1.239	1.443
									1.192	1.478	1.41	1.1	1.186	1.186	1.129	1.23	1.309	1.155	1.305	1.384	1.2	1.26	1.293	1.103	1.245	1.449				1.212	1.356	1.326	1.137	1.241	1.341	1.225	1.369		1.164	1.268	1.321	1.2	1.26	1.293	1.103	1.245	1.449
									1.197	1.481	1.412	1.102	1.188	1.188	1.128	1.233	1.31	1.154	1.305	1.386	1.201	1.261	1.295	1.109	1.253	1.457				1.214	1.357	1.327	1.139	1.242	1.341	1.229	1.37		1.163	1.269	1.323	1.201	1.261	1.295	1.109	1.253	1.457
									1.198	1.483	1.414	1.102	1.187	1.187	1.128	1.235	1.312	1.157	1.304	1.388	1.202	1.26	1.297	1.116	1.26	1.463				1.215	1.359	1.327	1.142	1.242	1.342	1.227	1.373		1.164	1.271	1.324	1.202	1.26	1.297	1.116	1.26	1.463
									1.2	1.485	1.417	1.104	1.189	1.189	1.129	1.238	1.312	1.158	1.303	1.389	1.204	1.261	1.297	1.123	1.268	1.471				1.219	1.361	1.326	1.145	1.246	1.344	1.226	1.373		1.165	1.272	1.325	1.204	1.261	1.297	1.123	1.268	1.471
									1.203	1.488	1.421	1.107	1.19	1.19	1.129	1.241	1.313	1.157	1.302	1.391	1.204	1.26	1.297	1.132	1.274	1.479				1.22	1.362	1.327	1.146	1.248	1.344	1.227	1.373		1.165	1.273	1.326	1.204	1.26	1.297	1.132	1.274	1.479
									1.207	1.492	1.424	1.109	1.19	1.19	1.13	1.242	1.313	1.16	1.303	1.393	1.205	1.261	1.298	1.141	1.28	1.487				1.222	1.363	1.327	1.147	1.249	1.345	1.229	1.374		1.167	1.276	1.328	1.205	1.261	1.298	1.141	1.28	1.487
									1.209	1.494	1.428	1.11	1.193	1.193	1.133	1.246	1.315	1.161	1.303	1.395	1.205	1.262	1.3	1.151	1.287	1.496				1.222	1.366	1.326	1.149	1.254	1.347	1.231	1.376		1.168	1.277	1.331	1.205	1.262	1.3	1.151	1.287	1.496
									1.213	1.496	1.432	1.111	1.194	1.194	1.133	1.25	1.317	1.161	1.303	1.395	1.206	1.262	1.301	1.161	1.291	1.503				1.225	1.367	1.324	1.151	1.255	1.347	1.232	1.378		1.17	1.28	1.334	1.206	1.262	1.301	1.161	1.291	1.503
									1.216	1.499	1.435	1.112	1.194	1.194	1.133	1.254	1.319	1.163	1.305	1.395	1.208	1.262	1.304	1.171	1.298	1.51				1.226	1.369	1.322	1.152	1.256	1.348	1.234	1.38		1.171	1.28	1.337	1.208	1.262	1.304	1.171	1.298	1.51
									1.222	1.501	1.437	1.112	1.193	1.193	1.135	1.257	1.319	1.163	1.308	1.395	1.209	1.263	1.306	1.182	1.305	1.518				1.229	1.371	1.32	1.154	1.258	1.348	1.233	1.381		1.173	1.28	1.338	1.209	1.263	1.306	1.182	1.305	1.518
									1.226	1.502	1.439	1.116	1.195	1.195	1.136	1.257	1.321	1.164	1.309	1.398	1.211	1.263	1.307	1.192	1.311	1.525				1.231	1.372	1.319	1.157	1.261	1.352	1.235	1.383		1.173	1.283	1.341	1.211	1.263	1.307	1.192	1.311	1.525
									1.231	1.504	1.441	1.119	1.196	1.196	1.136	1.26	1.324	1.165	1.311	1.4	1.212	1.264	1.307	1.204	1.318	1.531				1.236	1.372	1.318	1.158	1.263	1.352	1.238	1.385		1.173	1.287	1.342	1.212	1.264	1.307	1.204	1.318	1.531
									1.234	1.506	1.442	1.122	1.197	1.197	1.139	1.265	1.326	1.166	1.312	1.402	1.214	1.264	1.309	1.216	1.324	1.537				1.239	1.372	1.317	1.162	1.265	1.353	1.24	1.388		1.173	1.287	1.344	1.214	1.264	1.309	1.216	1.324	1.537
									1.239	1.507	1.443	1.125	1.196	1.196	1.142	1.271	1.33	1.168	1.314	1.402	1.215	1.264	1.309	1.227	1.332	1.541				1.243	1.373	1.316	1.164	1.267	1.353	1.242	1.389		1.174	1.288	1.347	1.215	1.264	1.309	1.227	1.332	1.541
									1.241	1.511	1.445	1.126	1.2	1.2	1.143	1.275	1.333	1.17	1.315	1.401	1.217	1.263	1.309	1.24	1.339	1.544				1.243	1.373	1.314	1.166	1.269	1.352	1.246	1.392		1.175	1.289	1.349	1.217	1.263	1.309	1.24	1.339	1.544
									1.245	1.514	1.445	1.13	1.204	1.204	1.141	1.278	1.337	1.171	1.315	1.402	1.219	1.264	1.309	1.251	1.344	1.548				1.245	1.376	1.313	1.168	1.271	1.349	1.25	1.396		1.175	1.29	1.35	1.219	1.264	1.309	1.251	1.344	1.548
								12	1.249	1.516	1.447	1.132	1.206	1.206	1.143	1.276	1.34	1.171	1.316	1.401	1.22	1.264	1.308	1.265	1.351	1.551			12	1.245	1.377	1.311	1.17	1.274	1.346	1.252	1.397		1.177	1.294	1.349	1.22	1.264	1.308	1.265	1.351	1.551
									1.253	1.519	1.451	1.134	1.21	1.21	1.145	1.279	1.343	1.172	1.315	1.401	1.22	1.265	1.307	1.275	1.357	1.557				1.249	1.379	1.309	1.171	1.274	1.346	1.254	1.399		1.178	1.298	1.352	1.22	1.265	1.307	1.275	1.357	1.557
									1.257	1.52	1.453	1.134	1.212	1.212	1.148	1.281	1.345	1.172	1.315	1.403	1.22	1.265	1.307	1.285	1.364	1.561				1.248	1.381	1.308	1.172	1.275	1.344	1.256	1.401		1.181	1.299	1.353	1.22	1.265	1.307	1.285	1.364	1.561
									1.261	1.524	1.455	1.137	1.215	1.215	1.15	1.284	1.345	1.173	1.316	1.405	1.221	1.264	1.309	1.296	1.372	1.563				1.25	1.383	1.305	1.174	1.278	1.344	1.256	1.4		1.182	1.301	1.355	1.221	1.264	1.309	1.296	1.372	1.563
									1.266	1.529	1.457	1.137	1.215	1.215	1.152	1.289	1.347	1.173	1.318	1.408	1.223	1.265	1.311	1.304	1.376	1.563				1.251	1.385	1.302	1.176	1.281	1.343	1.256	1.399		1.184	1.303	1.357	1.223	1.265	1.311	1.304	1.376	1.563
									1.268	1.533	1.463	1.136	1.214	1.214	1.155	1.294	1.35	1.177	1.32	1.409	1.223	1.265	1.312	1.315	1.377	1.565				1.251	1.388	1.299	1.176	1.285	1.339	1.257	1.399		1.185	1.305	1.358	1.223	1.265	1.312	1.315	1.377	1.565
									1.272	1.537	1.465	1.137	1.218	1.218	1.159	1.296	1.351	1.179	1.322	1.407	1.224	1.265	1.312	1.325	1.381	1.565				1.253	1.389	1.296	1.178	1.285	1.337	1.261	1.4		1.185	1.305	1.36	1.224	1.265	1.312	1.325	1.381	1.565
									1.275	1.542	1.467	1.138	1.22	1.22	1.161	1.298	1.352	1.179	1.323	1.408	1.226	1.265	1.311	1.338	1.386	1.563				1.255	1.392	1.292	1.179	1.286	1.334	1.264	1.404		1.187	1.306	1.359	1.226	1.265	1.311	1.338	1.386	1.563
									1.278	1.546	1.472	1.142	1.221	1.221	1.164	1.302	1.355	1.179	1.324	1.409	1.227	1.265	1.313	1.349	1.392	1.562				1.258	1.394	1.289	1.178	1.288	1.333	1.265	1.405		1.189	1.307	1.357	1.227	1.265	1.313	1.349	1.392	1.562
									1.282	1.548	1.475	1.143	1.224	1.224	1.164	1.307	1.359	1.18	1.324	1.41	1.228	1.266	1.313	1.361	1.396	1.56				1.259	1.398	1.285	1.18	1.291	1.331	1.268	1.409		1.189	1.31	1.357	1.228	1.266	1.313	1.361	1.396	1.56
									1.283	1.552	1.48	1.144	1.228	1.228	1.166	1.309	1.363	1.181	1.323	1.412	1.23	1.266	1.312	1.37	1.396	1.556				1.259	1.4	1.281	1.182	1.292	1.33	1.269	1.411		1.19	1.313	1.358	1.23	1.266	1.312	1.37	1.396	1.556
									1.286	1.555	1.484	1.146	1.235	1.235	1.168	1.312	1.365	1.183	1.323	1.411	1.231	1.267	1.312	1.379	1.398	1.548				1.262	1.402	1.279	1.182	1.292	1.327	1.27	1.411		1.192	1.314	1.358	1.231	1.267	1.312	1.379	1.398	1.548
									1.288	1.56	1.487	1.148	1.24	1.24	1.17	1.314	1.368	1.184	1.324	1.41	1.234	1.267	1.312	1.39	1.399	1.542				1.263	1.402	1.275	1.182	1.292	1.327	1.271	1.412		1.196	1.314	1.359	1.234	1.267	1.312	1.39	1.399	1.542
									1.293	1.563	1.492	1.152	1.245	1.245	1.172	1.316	1.371	1.187	1.324	1.411	1.235	1.267	1.313	1.399	1.398	1.537				1.262	1.402	1.271	1.183	1.295	1.326	1.271	1.411		1.197	1.315	1.359	1.235	1.267	1.313	1.399	1.398	1.537
									1.296	1.566	1.496	1.154	1.249	1.249	1.175	1.319	1.373	1.189	1.325	1.41	1.236	1.267	1.314	1.407	1.399	1.531				1.264	1.405	1.268	1.182	1.298	1.325	1.273	1.413		1.198	1.316	1.359	1.236	1.267	1.314	1.407	1.399	1.531
									1.296	1.568	1.499	1.155	1.251	1.251	1.176	1.319	1.374	1.19	1.325	1.408	1.236	1.267	1.315	1.415	1.4	1.523				1.266	1.406	1.265	1.185	1.3	1.325	1.275	1.413		1.201	1.317	1.36	1.236	1.267	1.315	1.415	1.4	1.523
									1.298	1.572	1.502	1.158	1.252	1.252	1.178	1.317	1.375	1.19	1.324	1.408	1.238	1.267	1.314	1.421	1.399	1.515				1.268	1.407	1.264	1.188	1.304	1.325	1.275	1.414		1.203	1.317	1.358	1.238	1.267	1.314	1.421	1.399	1.515
									1.303	1.575	1.505	1.158	1.25	1.25	1.181	1.319	1.378	1.191	1.324	1.408	1.239	1.266	1.312	1.43	1.395	1.508				1.271	1.408	1.263	1.189	1.306	1.325	1.276	1.415		1.204	1.317	1.361	1.239	1.266	1.312	1.43	1.395	1.508
									1.305	1.579	1.509	1.159	1.251	1.251	1.185	1.32	1.381	1.192	1.322	1.407	1.242	1.266	1.31	1.438	1.391	1.501				1.275	1.41	1.261	1.189	1.308	1.326	1.274	1.418		1.205	1.317	1.362	1.242	1.266	1.31	1.438	1.391	1.501
									1.309	1.582	1.511	1.16	1.249	1.249	1.185	1.321	1.382	1.195	1.321	1.407	1.243	1.265	1.31	1.444	1.39	1.491				1.278	1.411	1.259	1.19	1.31	1.327	1.273	1.42		1.206	1.319	1.366	1.243	1.265	1.31	1.444	1.39	1.491
									1.311	1.585	1.515	1.165	1.249	1.249	1.183	1.321	1.383	1.197	1.322	1.406	1.244	1.266	1.31	1.448	1.388	1.482				1.28	1.413	1.259	1.19	1.311	1.329	1.274	1.421		1.209	1.319	1.369	1.244	1.266	1.31	1.448	1.388	1.482
								13	1.314	1.587	1.518	1.167	1.251	1.251	1.183	1.322	1.386	1.198	1.323	1.403	1.245	1.266	1.31	1.455	1.384	1.476			13	1.281	1.414	1.257	1.191	1.313	1.332	1.275	1.422		1.21	1.32	1.372	1.245	1.266	1.31	1.455	1.384	1.476
									1.319	1.588	1.522	1.169	1.252	1.252	1.183	1.323	1.388	1.201	1.323	1.401	1.247	1.266	1.311	1.461	1.381	1.466				1.281	1.415	1.257	1.192	1.312	1.333	1.276	1.421		1.211	1.322	1.373	1.247	1.266	1.311	1.461	1.381	1.466
									1.322	1.592	1.525	1.17	1.256	1.256	1.186	1.325	1.391	1.2	1.324	1.401	1.248	1.266	1.312	1.466	1.374	1.453				1.28	1.418	1.255	1.194	1.314	1.337	1.278	1.423		1.213	1.321	1.374	1.248	1.266	1.312	1.466	1.374	1.453
									1.325	1.595	1.528	1.171	1.257	1.257	1.186	1.326	1.395	1.201	1.325	1.399	1.248	1.266	1.313	1.471	1.363	1.441				1.28	1.419	1.254	1.195	1.315	1.339	1.281	1.423		1.214	1.32	1.376	1.248	1.266	1.313	1.471	1.363	1.441
									1.328	1.597	1.53	1.172	1.261	1.261	1.188	1.329	1.397	1.202	1.326	1.4	1.249	1.266	1.314	1.478	1.347	1.427				1.283	1.421	1.254	1.198	1.316	1.339	1.281	1.425		1.215	1.32	1.376	1.249	1.266	1.314	1.478	1.347	1.427
									1.329	1.599	1.534	1.173	1.262	1.262	1.192	1.332	1.398	1.203	1.325	1.4	1.25	1.265	1.315	1.483	1.329	1.408				1.286	1.422	1.254	1.201	1.316	1.341	1.28	1.426		1.217	1.32	1.375	1.25	1.265	1.315	1.483	1.329	1.408
									1.33	1.601	1.539	1.175	1.265	1.265	1.197	1.339	1.396	1.205	1.327	1.402	1.251	1.265	1.314	1.488	1.319	1.389				1.287	1.425	1.254	1.202	1.318	1.344	1.28	1.427		1.22	1.321	1.376	1.251	1.265	1.314	1.488	1.319	1.389
									1.333	1.604	1.542	1.173	1.266	1.266	1.199	1.344	1.397	1.207	1.33	1.402	1.252	1.265	1.314	1.493	1.306	1.368				1.291	1.425	1.254	1.205	1.32	1.347	1.28	1.426		1.22	1.323	1.377	1.252	1.265	1.314	1.493	1.306	1.368
									1.338	1.606	1.546	1.174	1.269	1.269	1.202	1.346	1.399	1.208	1.33	1.403	1.253	1.264	1.314	1.499	1.292	1.352				1.293	1.427	1.253	1.206	1.32	1.347	1.28	1.427		1.221	1.324	1.379	1.253	1.264	1.314	1.499	1.292	1.352
									1.338	1.61	1.549	1.175	1.272	1.272	1.204	1.346	1.398	1.208	1.331	1.403	1.253	1.264	1.316	1.503	1.272	1.329				1.295	1.429	1.254	1.208	1.32	1.35	1.28	1.43		1.221	1.326	1.378	1.253	1.264	1.316	1.503	1.272	1.329
									1.341	1.612	1.553	1.177	1.274	1.274	1.207	1.345	1.4	1.21	1.333	1.403	1.253	1.264	1.316	1.508	1.257	1.306				1.298	1.432	1.253	1.209	1.322	1.353	1.281	1.431		1.222	1.327	1.379	1.253	1.264	1.316	1.508	1.257	1.306
									1.344	1.614	1.556	1.181	1.274	1.274	1.208	1.343	1.399	1.212	1.334	1.403	1.254	1.264	1.314	1.513	1.24	1.283				1.302	1.435	1.253	1.21	1.324	1.353	1.281	1.433		1.222	1.328	1.38	1.254	1.264	1.314	1.513	1.24	1.283
									1.347	1.615	1.559	1.182	1.275	1.275	1.21	1.343	1.397	1.212	1.334	1.404	1.255	1.264	1.314	1.519	1.223	1.257				1.303	1.437	1.252	1.211	1.323	1.355	1.281	1.433		1.222	1.33	1.38	1.255	1.264	1.314	1.519	1.223	1.257
									1.348	1.617	1.561	1.183	1.278	1.278	1.211	1.344	1.397	1.212	1.332	1.403	1.257	1.263	1.314	1.526	1.203	1.228				1.307	1.439	1.253	1.214	1.322	1.356	1.284	1.432		1.223	1.331	1.381	1.257	1.263	1.314	1.526	1.203	1.228
									1.351	1.62	1.562	1.185	1.283	1.283	1.211	1.341	1.396	1.213	1.333	1.402	1.259	1.263	1.314	1.531	1.184	1.206				1.308	1.439	1.252	1.216	1.324	1.357	1.285	1.433		1.225	1.333	1.38	1.259	1.263	1.314	1.531	1.184	1.206
									1.353	1.622	1.564	1.187	1.286	1.286	1.214	1.341	1.396	1.216	1.332	1.403	1.261	1.263	1.313	1.534	1.16	1.18				1.31	1.441	1.251	1.219	1.321	1.358	1.287	1.433		1.224	1.334	1.38	1.261	1.263	1.313	1.534	1.16	1.18
									1.358	1.626	1.565	1.194	1.294	1.294	1.214	1.342	1.396	1.217	1.331	1.404	1.262	1.263	1.313	1.539	1.14	1.151				1.313	1.442	1.252	1.223	1.321	1.36	1.287	1.435		1.223	1.336	1.383	1.262	1.263	1.313	1.539	1.14	1.151
									1.36	1.628	1.568	1.197	1.296	1.296	1.217	1.34	1.397	1.218	1.33	1.404	1.262	1.263	1.314	1.544	1.117	1.127				1.315	1.444	1.253	1.225	1.322	1.362	1.287	1.438		1.224	1.337	1.384	1.262	1.263	1.314	1.544	1.117	1.127
									1.362	1.63	1.571	1.2	1.298	1.298	1.218	1.34	1.397	1.218	1.33	1.403	1.263	1.263	1.313	1.547	1.089	1.098				1.317	1.445	1.252	1.227	1.322	1.365	1.289	1.439		1.224	1.339	1.384	1.263	1.263	1.313	1.547	1.089	1.098
									1.363	1.632	1.573	1.202	1.298	1.298	1.217	1.343	1.398	1.22	1.33	1.403	1.264	1.263	1.312	1.547	1.061	1.069				1.32	1.447	1.252	1.228	1.322	1.369	1.291	1.439		1.227	1.34	1.387	1.264	1.263	1.312	1.547	1.061	1.069
									1.366	1.633	1.574	1.205	1.298	1.298	1.218	1.347	1.399	1.222	1.332	1.403	1.265	1.263	1.31	1.549	1.033	1.04				1.322	1.448	1.253	1.229	1.322	1.369	1.292	1.439		1.228	1.341	1.388	1.265	1.263	1.31	1.549	1.033	1.04
								14	1.367	1.634	1.574	1.207	1.296	1.296	1.217	1.351	1.4	1.224	1.334	1.404	1.265	1.263	1.309	1.548	1.008	1.014			14	1.323	1.45	1.253	1.231	1.324	1.37	1.291	1.44		1.231	1.341	1.392	1.265	1.263	1.309	1.548	1.008	1.014
									1.37	1.636	1.576	1.208	1.297	1.297	1.218	1.357	1.404	1.225	1.335	1.405	1.265	1.263	1.309	1.544	0.983	0.99				1.325	1.451	1.254	1.233	1.326	1.369	1.291	1.442		1.234	1.342	1.393	1.265	1.263	1.309	1.544	0.983	0.99
									1.372	1.636	1.576	1.211	1.297	1.297	1.217	1.357	1.406	1.227	1.335	1.406	1.266	1.262	1.307	1.543	0.957	0.964				1.327	1.45	1.254	1.236	1.332	1.369	1.291	1.442		1.234	1.342	1.395	1.266	1.262	1.307	1.543	0.957	0.964
									1.374	1.636	1.576	1.213	1.3	1.3	1.219	1.358	1.408	1.227	1.333	1.406	1.266	1.261	1.306	1.534	0.933	0.938				1.329	1.451	1.254	1.237	1.335	1.37	1.292	1.441		1.235	1.341	1.395	1.266	1.261	1.306	1.534	0.933	0.938
									1.377	1.637	1.576	1.214	1.3	1.3	1.219	1.359	1.413	1.227	1.333	1.405	1.265	1.26	1.305	1.526	0.909	0.915				1.332	1.451	1.255	1.238	1.337	1.37	1.292	1.44		1.235	1.341	1.397	1.265	1.26	1.305	1.526	0.909	0.915
									1.378	1.637	1.576	1.215	1.301	1.301	1.22	1.359	1.419	1.229	1.331	1.404	1.266	1.26	1.303	1.52	0.886	0.89				1.335	1.452	1.254	1.241	1.338	1.369	1.291	1.439		1.238	1.34	1.398	1.266	1.26	1.303	1.52	0.886	0.89
									1.38	1.639	1.578	1.219	1.301	1.301	1.22	1.359	1.423	1.232	1.332	1.404	1.265	1.26	1.304	1.511	0.864	0.868				1.337	1.452	1.255	1.24	1.338	1.366	1.291	1.439		1.24	1.341	1.397	1.265	1.26	1.304	1.511	0.864	0.868
									1.383	1.64	1.58	1.222	1.304	1.304	1.222	1.359	1.42	1.234	1.33	1.403	1.266	1.26	1.304	1.505	0.843	0.848				1.34	1.454	1.254	1.242	1.339	1.363	1.291	1.439		1.241	1.34	1.397	1.266	1.26	1.304	1.505	0.843	0.848
									1.384	1.64	1.581	1.223	1.306	1.306	1.223	1.36	1.42	1.235	1.329	1.401	1.265	1.259	1.306	1.5	0.82	0.825				1.34	1.453	1.255	1.242	1.342	1.36	1.293	1.44		1.242	1.341	1.399	1.265	1.259	1.306	1.5	0.82	0.825
									1.387	1.641	1.583	1.221	1.306	1.306	1.224	1.36	1.421	1.236	1.329	1.401	1.266	1.258	1.306	1.489	0.794	0.801				1.341	1.453	1.256	1.243	1.342	1.359	1.294	1.44		1.242	1.341	1.399	1.266	1.258	1.306	1.489	0.794	0.801
									1.39	1.641	1.584	1.22	1.308	1.308	1.226	1.365	1.423	1.237	1.329	1.401	1.268	1.257	1.305	1.479	0.77	0.781				1.342	1.454	1.256	1.245	1.343	1.357	1.293	1.44		1.244	1.341	1.401	1.268	1.257	1.305	1.479	0.77	0.781
									1.392	1.641	1.585	1.219	1.307	1.307	1.227	1.371	1.424	1.237	1.328	1.4	1.271	1.257	1.306	1.468	0.744	0.761				1.342	1.454	1.256	1.246	1.344	1.355	1.295	1.44		1.246	1.342	1.398	1.271	1.257	1.306	1.468	0.744	0.761
									1.395	1.644	1.586	1.223	1.306	1.306	1.229	1.372	1.425	1.237	1.327	1.402	1.271	1.257	1.305	1.449	0.719	0.74				1.342	1.456	1.256	1.248	1.343	1.355	1.295	1.44		1.245	1.344	1.398	1.271	1.257	1.305	1.449	0.719	0.74
									1.398	1.645	1.585	1.225	1.305	1.305	1.231	1.373	1.426	1.236	1.327	1.4	1.273	1.257	1.305	1.436	0.696	0.719				1.343	1.459	1.257	1.249	1.345	1.353	1.292	1.441		1.248	1.342	1.397	1.273	1.257	1.305	1.436	0.696	0.719
									1.399	1.646	1.587	1.223	1.301	1.301	1.233	1.373	1.428	1.236	1.326	1.4	1.274	1.257	1.306	1.425	0.675	0.702				1.343	1.459	1.258	1.25	1.35	1.351	1.289	1.443		1.249	1.341	1.396	1.274	1.257	1.306	1.425	0.675	0.702
									1.404	1.648	1.587	1.222	1.3	1.3	1.232	1.375	1.429	1.235	1.326	1.397	1.274	1.256	1.304	1.41	0.655	0.684				1.343	1.46	1.26	1.251	1.354	1.349	1.29	1.442		1.25	1.339	1.397	1.274	1.256	1.304	1.41	0.655	0.684
									1.406	1.65	1.588	1.222	1.299	1.299	1.234	1.373	1.427	1.234	1.326	1.395	1.275	1.256	1.306	1.394	0.634	0.666				1.34	1.462	1.261	1.251	1.357	1.349	1.288	1.443		1.252	1.34	1.397	1.275	1.256	1.306	1.394	0.634	0.666
									1.408	1.651	1.589	1.222	1.302	1.302	1.236	1.374	1.425	1.232	1.326	1.391	1.275	1.256	1.305	1.376	0.615	0.649				1.337	1.463	1.264	1.254	1.361	1.353	1.286	1.445		1.253	1.34	1.395	1.275	1.256	1.305	1.376	0.615	0.649
									1.411	1.653	1.591	1.221	1.302	1.302	1.236	1.378	1.422	1.232	1.325	1.389	1.275	1.256	1.303	1.359	0.597	0.633				1.334	1.464	1.267	1.256	1.36	1.354	1.285	1.445		1.255	1.341	1.394	1.275	1.256	1.303	1.359	0.597	0.633
									1.413	1.655	1.593	1.223	1.304	1.304	1.238	1.379	1.42	1.232	1.327	1.386	1.275	1.256	1.302	1.342	0.578	0.615				1.331	1.464	1.268	1.259	1.361	1.354	1.284	1.447		1.256	1.34	1.394	1.275	1.256	1.302	1.342	0.578	0.615
									1.416	1.657	1.593	1.224	1.307	1.307	1.238	1.378	1.418	1.233	1.329	1.386	1.274	1.255	1.301	1.324	0.557	0.601				1.33	1.464	1.269	1.262	1.361	1.356	1.285	1.448		1.255	1.343	1.393	1.274	1.255	1.301	1.324	0.557	0.601
								15	1.419	1.657	1.594	1.226	1.312	1.312	1.241	1.378	1.417	1.235	1.329	1.384	1.274	1.255	1.302	1.307	0.54	0.587			15	1.331	1.463	1.272	1.261	1.359	1.357	1.286	1.447		1.257	1.344	1.392	1.274	1.255	1.302	1.307	0.54	0.587
									1.421	1.658	1.594	1.227	1.313	1.313	1.245	1.378	1.417	1.235	1.328	1.385	1.274	1.256	1.302	1.29	0.522	0.574				1.332	1.464	1.274	1.261	1.358	1.358	1.285	1.448		1.259	1.344	1.393	1.274	1.256	1.302	1.29	0.522	0.574
									1.424	1.66	1.596	1.228	1.317	1.317	1.247	1.376	1.414	1.237	1.327	1.385	1.274	1.256	1.302	1.27	0.507	0.561				1.332	1.464	1.276	1.264	1.357	1.36	1.286	1.449		1.258	1.344	1.392	1.274	1.256	1.302	1.27	0.507	0.561
									1.428	1.662	1.596	1.231	1.316	1.316	1.249	1.376	1.414	1.238	1.328	1.385	1.275	1.256	1.301	1.245	0.492	0.55				1.334	1.465	1.278	1.266	1.356	1.361	1.285	1.446		1.257	1.342	1.392	1.275	1.256	1.301	1.245	0.492	0.55
									1.43	1.662	1.596	1.231	1.319	1.319	1.25	1.376	1.412	1.239	1.327	1.385	1.277	1.256	1.3	1.22	0.477	0.539				1.334	1.466	1.281	1.27	1.358	1.362	1.285	1.445		1.258	1.343	1.391	1.277	1.256	1.3	1.22	0.477	0.539
									1.433	1.663	1.596	1.233	1.319	1.319	1.255	1.374	1.414	1.24	1.326	1.383	1.277	1.255	1.3	1.196	0.461	0.528				1.336	1.468	1.283	1.271	1.36	1.364	1.286	1.445		1.257	1.344	1.392	1.277	1.255	1.3	1.196	0.461	0.528
									1.436	1.664	1.597	1.236	1.321	1.321	1.259	1.373	1.418	1.241	1.326	1.381	1.279	1.254	1.3	1.171	0.448	0.516				1.337	1.468	1.285	1.27	1.36	1.364	1.286	1.443		1.256	1.343	1.392	1.279	1.254	1.3	1.171	0.448	0.516
									1.44	1.665	1.598	1.239	1.323	1.323	1.258	1.372	1.423	1.243	1.326	1.381	1.28	1.253	1.3	1.146	0.434	0.504				1.335	1.47	1.287	1.271	1.36	1.367	1.284	1.443		1.256	1.341	1.392	1.28	1.253	1.3	1.146	0.434	0.504
									1.443	1.666	1.598	1.242	1.32	1.32	1.256	1.373	1.425	1.244	1.326	1.382	1.28	1.253	1.3	1.118	0.422	0.493				1.337	1.471	1.289	1.271	1.363	1.372	1.284	1.442		1.256	1.339	1.392	1.28	1.253	1.3	1.118	0.422	0.493
									1.445	1.667	1.599	1.246	1.319	1.319	1.254	1.374	1.423	1.245	1.325	1.381	1.281	1.253	1.299	1.095	0.408	0.482				1.339	1.471	1.29	1.272	1.365	1.371	1.281	1.443		1.258	1.338	1.393	1.281	1.253	1.299	1.095	0.408	0.482
									1.448	1.669	1.599	1.247	1.317	1.317	1.254	1.373	1.425	1.245	1.326	1.38	1.283	1.252	1.297	1.072	0.396	0.472				1.343	1.471	1.292	1.272	1.366	1.373	1.277	1.446		1.259	1.338	1.392	1.283	1.252	1.297	1.072	0.396	0.472
									1.451	1.67	1.599	1.249	1.318	1.318	1.255	1.373	1.424	1.247	1.326	1.38	1.283	1.252	1.297	1.048	0.386	0.463				1.345	1.471	1.295	1.272	1.365	1.375	1.274	1.447		1.261	1.339	1.394	1.283	1.252	1.297	1.048	0.386	0.463
									1.456	1.672	1.599	1.249	1.318	1.318	1.254	1.371	1.423	1.246	1.325	1.379	1.284	1.252	1.297	1.025	0.376	0.454				1.347	1.474	1.297	1.271	1.366	1.376	1.271	1.45		1.263	1.339	1.394	1.284	1.252	1.297	1.025	0.376	0.454
									1.46	1.673	1.598	1.249	1.317	1.317	1.255	1.37	1.422	1.245	1.327	1.378	1.284	1.252	1.297	0.999	0.366	0.444				1.348	1.474	1.298	1.271	1.365	1.377	1.269	1.448		1.264	1.337	1.394	1.284	1.252	1.297	0.999	0.366	0.444
									1.462	1.675	1.597	1.248	1.318	1.318	1.258	1.368	1.421	1.246	1.327	1.377	1.284	1.252	1.297	0.972	0.357	0.435				1.35	1.474	1.299	1.271	1.365	1.379	1.267	1.448		1.265	1.338	1.392	1.284	1.252	1.297	0.972	0.357	0.435
									1.466	1.672	1.596	1.25	1.318	1.318	1.26	1.37	1.422	1.247	1.326	1.375	1.284	1.251	1.297	0.946	0.349	0.426				1.35	1.473	1.3	1.27	1.363	1.379	1.264	1.45		1.266	1.336	1.391	1.284	1.251	1.297	0.946	0.349	0.426
									1.467	1.673	1.595	1.249	1.32	1.32	1.261	1.368	1.419	1.25	1.325	1.376	1.286	1.251	1.295	0.922	0.341	0.419				1.351	1.471	1.302	1.271	1.361	1.379	1.261	1.449		1.266	1.334	1.391	1.286	1.251	1.295	0.922	0.341	0.419
									1.47	1.674	1.595	1.251	1.322	1.322	1.265	1.368	1.421	1.251	1.324	1.375	1.287	1.251	1.296	0.898	0.333	0.411				1.355	1.471	1.304	1.272	1.358	1.379	1.257	1.449		1.266	1.334	1.39	1.287	1.251	1.296	0.898	0.333	0.411
									1.474	1.675	1.595	1.255	1.323	1.323	1.268	1.365	1.42	1.252	1.324	1.377	1.288	1.25	1.295	0.875	0.324	0.404				1.356	1.472	1.306	1.275	1.358	1.382	1.252	1.448		1.268	1.334	1.389	1.288	1.25	1.295	0.875	0.324	0.404
									1.477	1.675	1.593	1.258	1.324	1.324	1.271	1.365	1.419	1.251	1.325	1.378	1.29	1.25	1.295	0.849	0.316	0.397				1.357	1.473	1.31	1.277	1.354	1.385	1.248	1.448		1.27	1.333	1.39	1.29	1.25	1.295	0.849	0.316	0.397
									1.48	1.675	1.592	1.261	1.324	1.324	1.27	1.367	1.418	1.249	1.325	1.378	1.29	1.25	1.294	0.827	0.308	0.39				1.358	1.472	1.313	1.279	1.354	1.387	1.246	1.447		1.271	1.332	1.388	1.29	1.25	1.294	0.827	0.308	0.39
								16	1.482	1.675	1.593	1.263	1.324	1.324	1.27	1.369	1.418	1.249	1.323	1.379	1.292	1.25	1.294	0.805	0.3	0.383			16	1.359	1.472	1.315	1.281	1.353	1.389	1.242	1.447		1.272	1.332	1.388	1.292	1.25	1.294	0.805	0.3	0.383
									1.486	1.674	1.593	1.264	1.326	1.326	1.27	1.368	1.416	1.249	1.322	1.378	1.292	1.25	1.294	0.782	0.293	0.376				1.361	1.47	1.317	1.28	1.353	1.39	1.24	1.448		1.273	1.332	1.388	1.292	1.25	1.294	0.782	0.293	0.376
									1.49	1.674	1.594	1.265	1.329	1.329	1.269	1.369	1.415	1.248	1.321	1.378	1.294	1.248	1.295	0.761	0.287	0.37				1.362	1.469	1.319	1.278	1.355	1.392	1.24	1.447		1.275	1.332	1.387	1.294	1.248	1.295	0.761	0.287	0.37
									1.494	1.674	1.595	1.267	1.329	1.329	1.268	1.368	1.416	1.247	1.32	1.378	1.295	1.247	1.294	0.743	0.28	0.364				1.365	1.469	1.322	1.277	1.354	1.394	1.239	1.447		1.277	1.332	1.384	1.295	1.247	1.294	0.743	0.28	0.364
									1.497	1.675	1.594	1.269	1.33	1.33	1.27	1.367	1.415	1.245	1.32	1.377	1.294	1.247	1.292	0.724	0.273	0.357				1.367	1.468	1.325	1.278	1.353	1.395	1.239	1.446		1.277	1.33	1.381	1.294	1.247	1.292	0.724	0.273	0.357
									1.5	1.678	1.593	1.27	1.328	1.328	1.273	1.363	1.415	1.245	1.32	1.378	1.295	1.247	1.292	0.706	0.267	0.351				1.37	1.468	1.326	1.278	1.354	1.394	1.239	1.449		1.276	1.33	1.38	1.295	1.247	1.292	0.706	0.267	0.351
									1.502	1.677	1.592	1.27	1.325	1.325	1.273	1.36	1.414	1.245	1.322	1.378	1.296	1.247	1.29	0.687	0.261	0.345				1.372	1.468	1.329	1.278	1.354	1.394	1.239	1.45		1.277	1.33	1.38	1.296	1.247	1.29	0.687	0.261	0.345
									1.507	1.679	1.591	1.269	1.328	1.328	1.276	1.357	1.414	1.243	1.323	1.377	1.296	1.246	1.289	0.668	0.255	0.339				1.374	1.467	1.332	1.278	1.355	1.395	1.24	1.449		1.277	1.33	1.379	1.296	1.246	1.289	0.668	0.255	0.339
									1.51	1.678	1.589	1.268	1.327	1.327	1.277	1.355	1.415	1.244	1.322	1.377	1.296	1.246	1.289	0.652	0.25	0.333				1.374	1.465	1.336	1.281	1.357	1.396	1.239	1.448		1.277	1.329	1.38	1.296	1.246	1.289	0.652	0.25	0.333
									1.513	1.678	1.587	1.267	1.328	1.328	1.278	1.354	1.418	1.244	1.324	1.376	1.296	1.246	1.289	0.638	0.245	0.328				1.376	1.465	1.337	1.284	1.357	1.399	1.239	1.448		1.276	1.329	1.379	1.296	1.246	1.289	0.638	0.245	0.328
									1.516	1.678	1.584	1.266	1.33	1.33	1.276	1.354	1.419	1.243	1.325	1.375	1.297	1.247	1.288	0.621	0.24	0.323				1.375	1.466	1.338	1.285	1.357	1.404	1.238	1.448		1.276	1.328	1.378	1.297	1.247	1.288	0.621	0.24	0.323
									1.52	1.678	1.583	1.268	1.331	1.331	1.277	1.352	1.419	1.242	1.326	1.375	1.296	1.247	1.288	0.604	0.235	0.318				1.376	1.464	1.34	1.288	1.36	1.407	1.237	1.448		1.275	1.329	1.378	1.296	1.247	1.288	0.604	0.235	0.318
									1.524	1.679	1.582	1.267	1.332	1.332	1.279	1.349	1.418	1.243	1.328	1.372	1.297	1.246	1.289	0.591	0.23	0.313				1.378	1.464	1.341	1.291	1.36	1.41	1.237	1.447		1.272	1.328	1.378	1.297	1.246	1.289	0.591	0.23	0.313
									1.525	1.682	1.581	1.266	1.333	1.333	1.278	1.347	1.419	1.243	1.328	1.372	1.297	1.246	1.288	0.576	0.225	0.307				1.379	1.464	1.342	1.292	1.36	1.411	1.238	1.447		1.272	1.329	1.381	1.297	1.246	1.288	0.576	0.225	0.307
									1.529	1.683	1.578	1.269	1.333	1.333	1.279	1.346	1.418	1.245	1.331	1.373	1.296	1.246	1.29	0.562	0.22	0.303				1.377	1.462	1.343	1.294	1.359	1.413	1.24	1.446		1.273	1.327	1.381	1.296	1.246	1.29	0.562	0.22	0.303
									1.532	1.683	1.576	1.271	1.336	1.336	1.284	1.344	1.418	1.244	1.33	1.372	1.296	1.245	1.291	0.55	0.216	0.298				1.376	1.461	1.344	1.297	1.359	1.412	1.241	1.445		1.274	1.326	1.38	1.296	1.245	1.291	0.55	0.216	0.298
									1.534	1.685	1.574	1.274	1.334	1.334	1.286	1.343	1.418	1.245	1.329	1.37	1.296	1.247	1.292	0.538	0.212	0.293				1.375	1.46	1.344	1.301	1.36	1.414	1.241	1.445		1.273	1.328	1.38	1.296	1.247	1.292	0.538	0.212	0.293
									1.537	1.688	1.572	1.273	1.333	1.333	1.288	1.341	1.417	1.247	1.327	1.367	1.296	1.247	1.293	0.527	0.208	0.288				1.375	1.459	1.344	1.303	1.359	1.417	1.242	1.446		1.273	1.328	1.378	1.296	1.247	1.293	0.527	0.208	0.288
									1.541	1.69	1.569	1.278	1.33	1.33	1.29	1.341	1.416	1.248	1.324	1.365	1.297	1.247	1.294	0.513	0.204	0.283				1.374	1.458	1.344	1.303	1.362	1.418	1.243	1.446		1.273	1.328	1.377	1.297	1.247	1.294	0.513	0.204	0.283
									1.543	1.692	1.568	1.277	1.327	1.327	1.293	1.34	1.415	1.249	1.322	1.364	1.298	1.247	1.293	0.503	0.2	0.279				1.373	1.459	1.345	1.304	1.365	1.418	1.245	1.445		1.274	1.326	1.377	1.298	1.247	1.293	0.503	0.2	0.279
									1.546	1.693	1.565	1.277	1.325	1.325	1.295	1.341	1.415	1.25	1.321	1.364	1.298	1.247	1.293	0.492	0.197	0.275				1.372	1.459	1.346	1.304	1.368	1.419	1.246	1.442		1.274	1.323	1.379	1.298	1.247	1.293	0.492	0.197	0.275
								17	1.549	1.694	1.564	1.277	1.324	1.324	1.296	1.339	1.416	1.251	1.32	1.364	1.299	1.247	1.292	0.482	0.193	0.271			17	1.371	1.457	1.347	1.304	1.37	1.419	1.25	1.439		1.275	1.321	1.377	1.299	1.247	1.292	0.482	0.193	0.271
									1.552	1.693	1.562	1.278	1.325	1.325	1.296	1.337	1.413	1.251	1.319	1.362	1.299	1.247	1.291	0.471	0.19	0.267				1.37	1.458	1.347	1.304	1.374	1.421	1.253	1.44		1.273	1.32	1.378	1.299	1.247	1.291	0.471	0.19	0.267
									1.554	1.695	1.559	1.278	1.327	1.327	1.296	1.336	1.413	1.253	1.317	1.363	1.3	1.247	1.291	0.46	0.187	0.263				1.37	1.458	1.347	1.305	1.376	1.424	1.257	1.438		1.274	1.317	1.377	1.3	1.247	1.291	0.46	0.187	0.263
									1.557	1.696	1.556	1.28	1.326	1.326	1.295	1.335	1.411	1.254	1.317	1.363	1.299	1.247	1.29	0.45	0.184	0.26				1.372	1.457	1.346	1.307	1.378	1.424	1.259	1.437		1.274	1.316	1.377	1.299	1.247	1.29	0.45	0.184	0.26
									1.56	1.699	1.553	1.281	1.327	1.327	1.296	1.331	1.411	1.255	1.316	1.361	1.299	1.246	1.29	0.44	0.183	0.256				1.372	1.456	1.346	1.306	1.378	1.425	1.263	1.439		1.272	1.315	1.379	1.299	1.246	1.29	0.44	0.183	0.256
									1.562	1.701	1.55	1.285	1.328	1.328	1.298	1.33	1.41	1.255	1.317	1.36	1.3	1.246	1.291	0.431	0.18	0.253				1.372	1.454	1.346	1.306	1.381	1.426	1.266	1.441		1.269	1.314	1.379	1.3	1.246	1.291	0.431	0.18	0.253
									1.565	1.702	1.546	1.285	1.328	1.328	1.3	1.329	1.41	1.255	1.317	1.36	1.299	1.245	1.291	0.422	0.177	0.25				1.374	1.456	1.345	1.305	1.38	1.425	1.269	1.442		1.267	1.313	1.377	1.299	1.245	1.291	0.422	0.177	0.25
									1.567	1.7	1.543	1.286	1.328	1.328	1.304	1.327	1.41	1.256	1.315	1.36	1.299	1.244	1.292	0.412	0.174	0.246				1.375	1.457	1.344	1.305	1.379	1.425	1.269	1.441		1.268	1.311	1.379	1.299	1.244	1.292	0.412	0.174	0.246
									1.57	1.698	1.539	1.287	1.328	1.328	1.306	1.327	1.412	1.258	1.315	1.36	1.299	1.245	1.294	0.403	0.172	0.243				1.376	1.457	1.344	1.307	1.379	1.427	1.271	1.441		1.267	1.312	1.377	1.299	1.245	1.294	0.403	0.172	0.243
									1.571	1.696	1.537	1.288	1.326	1.326	1.305	1.326	1.412	1.26	1.314	1.36	1.299	1.244	1.294	0.394	0.169	0.24				1.377	1.458	1.344	1.307	1.379	1.428	1.273	1.443		1.268	1.314	1.378	1.299	1.244	1.294	0.394	0.169	0.24
									1.574	1.694	1.534	1.287	1.327	1.327	1.305	1.325	1.41	1.26	1.313	1.36	1.298	1.244	1.295	0.385	0.166	0.237				1.38	1.458	1.344	1.31	1.379	1.429	1.277	1.441		1.27	1.315	1.378	1.298	1.244	1.295	0.385	0.166	0.237
									1.574	1.694	1.53	1.288	1.328	1.328	1.306	1.325	1.413	1.263	1.312	1.357	1.298	1.243	1.295	0.377	0.164	0.234				1.383	1.459	1.343	1.315	1.378	1.43	1.278	1.44		1.271	1.315	1.377	1.298	1.243	1.295	0.377	0.164	0.234
									1.575	1.695	1.528	1.288	1.33	1.33	1.306	1.323	1.415	1.264	1.313	1.358	1.297	1.243	1.294	0.37	0.161	0.231				1.386	1.459	1.343	1.318	1.377	1.43	1.279	1.439		1.273	1.315	1.378	1.297	1.243	1.294	0.37	0.161	0.231
									1.575	1.694	1.524	1.289	1.332	1.332	1.307	1.324	1.414	1.266	1.313	1.36	1.297	1.242	1.294	0.362	0.159	0.229				1.389	1.459	1.344	1.32	1.376	1.428	1.28	1.442		1.271	1.315	1.379	1.297	1.242	1.294	0.362	0.159	0.229
									1.576	1.695	1.522	1.291	1.329	1.329	1.308	1.324	1.415	1.266	1.314	1.36	1.296	1.241	1.295	0.355	0.157	0.227				1.392	1.459	1.344	1.324	1.377	1.426	1.282	1.444		1.269	1.315	1.38	1.296	1.241	1.295	0.355	0.157	0.227
									1.576	1.693	1.519	1.289	1.327	1.327	1.311	1.323	1.416	1.266	1.314	1.362	1.295	1.241	1.296	0.348	0.155	0.225				1.392	1.459	1.343	1.326	1.376	1.426	1.283	1.443		1.269	1.315	1.38	1.295	1.241	1.296	0.348	0.155	0.225
									1.576	1.695	1.516	1.288	1.326	1.326	1.308	1.321	1.414	1.266	1.316	1.362	1.294	1.241	1.296	0.34	0.153	0.222				1.394	1.459	1.343	1.327	1.375	1.427	1.285	1.442		1.269	1.313	1.382	1.294	1.241	1.296	0.34	0.153	0.222
									1.577	1.693	1.512	1.287	1.328	1.328	1.308	1.318	1.415	1.267	1.316	1.363	1.295	1.24	1.296	0.332	0.151	0.22				1.396	1.46	1.342	1.329	1.374	1.427	1.285	1.441		1.269	1.313	1.383	1.295	1.24	1.296	0.332	0.151	0.22
									1.576	1.692	1.508	1.286	1.326	1.326	1.306	1.317	1.414	1.268	1.318	1.363	1.296	1.239	1.296	0.325	0.15	0.218				1.397	1.461	1.342	1.331	1.373	1.427	1.285	1.443		1.269	1.314	1.381	1.296	1.239	1.296	0.325	0.15	0.218
									1.577	1.691	1.506	1.287	1.324	1.324	1.307	1.317	1.416	1.268	1.318	1.362	1.296	1.239	1.296	0.318	0.147	0.216				1.4	1.463	1.341	1.331	1.373	1.427	1.287	1.445		1.267	1.314	1.378	1.296	1.239	1.296	0.318	0.147	0.216
									1.578	1.694	1.502	1.289	1.323	1.323	1.305	1.318	1.416	1.268	1.318	1.363	1.297	1.239	1.296	0.312	0.145	0.213				1.403	1.463	1.341	1.332	1.374	1.426	1.289	1.446		1.265	1.316	1.378	1.297	1.239	1.296	0.312	0.145	0.213
								18	1.578	1.692	1.5	1.291	1.322	1.322	1.307	1.321	1.42	1.269	1.319	1.362	1.298	1.238	1.296	0.305	0.144	0.211			18	1.408	1.461	1.341	1.335	1.374	1.426	1.291	1.447		1.264	1.317	1.378	1.298	1.238	1.296	0.305	0.144	0.211
									1.577	1.694	1.498	1.291	1.322	1.322	1.309	1.322	1.423	1.27	1.32	1.363	1.298	1.238	1.296	0.299	0.143	0.209				1.412	1.46	1.341	1.336	1.375	1.426	1.292	1.446		1.262	1.316	1.377	1.298	1.238	1.296	0.299	0.143	0.209
									1.576	1.693	1.494	1.293	1.321	1.321	1.309	1.322	1.422	1.271	1.322	1.363	1.297	1.238	1.296	0.293	0.141	0.207				1.416	1.46	1.34	1.334	1.375	1.426	1.293	1.448		1.261	1.317	1.376	1.297	1.238	1.296	0.293	0.141	0.207
									1.576	1.696	1.491	1.292	1.324	1.324	1.31	1.322	1.424	1.273	1.324	1.364	1.297	1.238	1.297	0.287	0.139	0.206				1.418	1.46	1.339	1.333	1.375	1.427	1.293	1.45		1.263	1.317	1.373	1.297	1.238	1.297	0.287	0.139	0.206
									1.576	1.7	1.488	1.291	1.324	1.324	1.309	1.32	1.425	1.274	1.325	1.366	1.298	1.238	1.297	0.282	0.138	0.204				1.419	1.461	1.337	1.333	1.375	1.427	1.295	1.451		1.263	1.315	1.372	1.298	1.238	1.297	0.282	0.138	0.204
									1.576	1.701	1.482	1.289	1.325	1.325	1.308	1.319	1.426	1.277	1.325	1.366	1.299	1.238	1.299	0.278	0.136	0.203				1.421	1.462	1.337	1.333	1.374	1.427	1.297	1.45		1.263	1.316	1.367	1.299	1.238	1.299	0.278	0.136	0.203
									1.576	1.703	1.48	1.286	1.326	1.326	1.308	1.314	1.426	1.278	1.326	1.366	1.299	1.238	1.299	0.273	0.136	0.201				1.424	1.46	1.335	1.334	1.374	1.427	1.299	1.449		1.263	1.315	1.367	1.299	1.238	1.299	0.273	0.136	0.201
									1.576	1.708	1.476	1.285	1.325	1.325	1.307	1.313	1.423	1.279	1.327	1.366	1.299	1.238	1.297	0.269	0.135	0.199				1.428	1.462	1.332	1.334	1.373	1.428	1.301	1.448		1.263	1.315	1.366	1.299	1.238	1.297	0.269	0.135	0.199
									1.577	1.709	1.473	1.285	1.327	1.327	1.306	1.312	1.426	1.28	1.328	1.365	1.3	1.238	1.295	0.264	0.134	0.197				1.432	1.462	1.331	1.334	1.371	1.428	1.304	1.447		1.265	1.316	1.366	1.3	1.238	1.295	0.264	0.134	0.197
									1.577	1.71	1.469	1.286	1.326	1.326	1.305	1.31	1.428	1.278	1.326	1.363	1.299	1.238	1.293	0.26	0.132	0.196				1.435	1.463	1.33	1.335	1.369	1.428	1.306	1.447		1.265	1.316	1.366	1.299	1.238	1.293	0.26	0.132	0.196
									1.578	1.711	1.465	1.287	1.326	1.326	1.304	1.307	1.431	1.277	1.327	1.363	1.299	1.238	1.292	0.255	0.132	0.194				1.438	1.463	1.33	1.336	1.367	1.428	1.309	1.445		1.262	1.317	1.366	1.299	1.238	1.292	0.255	0.132	0.194
									1.578	1.714	1.464	1.288	1.327	1.327	1.302	1.306	1.435	1.277	1.325	1.362	1.299	1.238	1.289	0.249	0.131	0.192				1.441	1.463	1.329	1.336	1.365	1.429	1.311	1.445		1.262	1.315	1.365	1.299	1.238	1.289	0.249	0.131	0.192
									1.579	1.715	1.461	1.291	1.327	1.327	1.303	1.306	1.436	1.279	1.323	1.363	1.299	1.238	1.287	0.244	0.131	0.191				1.444	1.463	1.327	1.336	1.365	1.431	1.31	1.444		1.262	1.314	1.366	1.299	1.238	1.287	0.244	0.131	0.191
									1.578	1.719	1.458	1.293	1.322	1.322	1.305	1.307	1.434	1.279	1.322	1.362	1.299	1.239	1.284	0.24	0.13	0.189				1.445	1.463	1.324	1.338	1.364	1.431	1.311	1.445		1.264	1.312	1.366	1.299	1.239	1.284	0.24	0.13	0.189
									1.578	1.719	1.457	1.295	1.32	1.32	1.308	1.309	1.433	1.28	1.322	1.365	1.298	1.238	1.283	0.236	0.13	0.188				1.448	1.463	1.323	1.339	1.362	1.431	1.31	1.444		1.266	1.31	1.368	1.298	1.238	1.283	0.236	0.13	0.188
									1.578	1.72	1.453	1.297	1.319	1.319	1.308	1.31	1.433	1.282	1.321	1.364	1.297	1.238	1.283	0.231	0.129	0.187				1.449	1.462	1.323	1.338	1.36	1.433	1.311	1.446		1.266	1.308	1.368	1.297	1.238	1.283	0.231	0.129	0.187
									1.578	1.716	1.451	1.299	1.317	1.317	1.308	1.313	1.435	1.284	1.321	1.362	1.298	1.238	1.284	0.228	0.129	0.186				1.451	1.462	1.321	1.338	1.36	1.432	1.312	1.447		1.266	1.308	1.369	1.298	1.238	1.284	0.228	0.129	0.186
									1.578	1.713	1.449	1.298	1.318	1.318	1.306	1.314	1.433	1.284	1.321	1.362	1.298	1.238	1.283	0.225	0.128	0.185				1.453	1.461	1.318	1.338	1.359	1.432	1.313	1.445		1.267	1.309	1.366	1.298	1.238	1.283	0.225	0.128	0.185
									1.579	1.711	1.446	1.297	1.32	1.32	1.308	1.318	1.431	1.284	1.32	1.36	1.298	1.237	1.281	0.221	0.128	0.183				1.456	1.461	1.316	1.339	1.359	1.432	1.315	1.446		1.265	1.309	1.364	1.298	1.237	1.281	0.221	0.128	0.183
									1.577	1.713	1.444	1.296	1.319	1.319	1.309	1.319	1.431	1.284	1.32	1.359	1.299	1.237	1.281	0.218	0.127	0.182				1.458	1.462	1.315	1.341	1.358	1.434	1.313	1.444		1.263	1.31	1.364	1.299	1.237	1.281	0.218	0.127	0.182
									1.579	1.71	1.442	1.294	1.318	1.318	1.309	1.321	1.43	1.285	1.319	1.359	1.298	1.236	1.279	0.215	0.127	0.181				1.462	1.461	1.313	1.341	1.361	1.434	1.313	1.444		1.259	1.309	1.362	1.298	1.236	1.279	0.215	0.127	0.181
								19	1.581	1.706	1.438	1.292	1.317	1.317	1.309	1.321	1.432	1.284	1.318	1.359	1.298	1.236	1.28	0.212	0.126	0.181			19	1.465	1.462	1.313	1.34	1.36	1.435	1.313	1.445		1.259	1.308	1.364	1.298	1.236	1.28	0.212	0.126	0.181
									1.581	1.7	1.434	1.291	1.313	1.313	1.307	1.318	1.431	1.282	1.319	1.359	1.296	1.235	1.279	0.209	0.126	0.18				1.467	1.463	1.313	1.341	1.361	1.435	1.314	1.443		1.258	1.308	1.364	1.296	1.235	1.279	0.209	0.126	0.18
									1.581	1.699	1.43	1.289	1.312	1.312	1.306	1.317	1.432	1.281	1.318	1.358	1.298	1.235	1.278	0.206	0.126	0.179				1.468	1.462	1.313	1.342	1.361	1.435	1.315	1.441		1.259	1.307	1.366	1.298	1.235	1.278	0.206	0.126	0.179
									1.581	1.699	1.425	1.287	1.31	1.31	1.306	1.313	1.432	1.279	1.319	1.356	1.298	1.234	1.277	0.203	0.125	0.178				1.47	1.46	1.312	1.343	1.36	1.434	1.318	1.442		1.26	1.308	1.368	1.298	1.234	1.277	0.203	0.125	0.178
									1.584	1.698	1.42	1.284	1.31	1.31	1.309	1.31	1.431	1.278	1.318	1.356	1.298	1.233	1.276	0.201	0.124	0.178				1.473	1.46	1.312	1.347	1.361	1.435	1.319	1.443		1.262	1.307	1.368	1.298	1.233	1.276	0.201	0.124	0.178
									1.584	1.684	1.415	1.281	1.311	1.311	1.308	1.309	1.43	1.277	1.317	1.356	1.298	1.233	1.276	0.198	0.124	0.177				1.474	1.459	1.309	1.349	1.363	1.434	1.319	1.444		1.263	1.306	1.368	1.298	1.233	1.276	0.198	0.124	0.177
									1.585	1.675	1.411	1.28	1.311	1.311	1.305	1.306	1.431	1.279	1.316	1.356	1.298	1.232	1.277	0.195	0.124	0.177				1.475	1.457	1.308	1.347	1.362	1.432	1.32	1.447		1.263	1.304	1.368	1.298	1.232	1.277	0.195	0.124	0.177
									1.587	1.658	1.407	1.283	1.311	1.311	1.302	1.306	1.429	1.278	1.314	1.355	1.298	1.232	1.277	0.193	0.124	0.175				1.477	1.457	1.307	1.346	1.362	1.432	1.321	1.448		1.264	1.304	1.367	1.298	1.232	1.277	0.193	0.124	0.175
									1.59	1.643	1.404	1.284	1.309	1.309	1.301	1.307	1.427	1.279	1.313	1.352	1.298	1.231	1.276	0.19	0.123	0.174				1.479	1.456	1.307	1.344	1.361	1.432	1.321	1.45		1.265	1.305	1.366	1.298	1.231	1.276	0.19	0.123	0.174
									1.593	1.624	1.402	1.287	1.306	1.306	1.3	1.306	1.425	1.28	1.312	1.351	1.298	1.231	1.275	0.188	0.123	0.174				1.478	1.456	1.308	1.343	1.362	1.432	1.32	1.453		1.264	1.304	1.367	1.298	1.231	1.275	0.188	0.123	0.174
									1.597	1.602	1.402	1.289	1.304	1.304	1.298	1.308	1.423	1.282	1.311	1.348	1.299	1.23	1.274	0.186	0.123	0.173				1.478	1.458	1.307	1.341	1.362	1.432	1.32	1.456		1.264	1.302	1.365	1.299	1.23	1.274	0.186	0.123	0.173
									1.6	1.576	1.396	1.291	1.302	1.302	1.297	1.306	1.422	1.28	1.313	1.347	1.299	1.229	1.275	0.183	0.123	0.173				1.477	1.458	1.305	1.339	1.36	1.431	1.321	1.456		1.26	1.302	1.364	1.299	1.229	1.275	0.183	0.123	0.173
									1.603	1.552	1.389	1.291	1.302	1.302	1.294	1.304	1.422	1.282	1.311	1.343	1.299	1.228	1.275	0.181	0.123	0.172				1.477	1.457	1.303	1.339	1.363	1.431	1.322	1.455		1.26	1.302	1.364	1.299	1.228	1.275	0.181	0.123	0.172
									1.606	1.528	1.383	1.291	1.303	1.303	1.295	1.305	1.422	1.279	1.313	1.341	1.3	1.229	1.274	0.179	0.122	0.171				1.477	1.457	1.301	1.337	1.362	1.434	1.324	1.455		1.259	1.301	1.365	1.3	1.229	1.274	0.179	0.122	0.171
									1.61	1.511	1.376	1.29	1.304	1.304	1.295	1.305	1.421	1.278	1.314	1.341	1.3	1.227	1.274	0.177	0.122	0.171				1.477	1.457	1.3	1.337	1.364	1.435	1.326	1.451		1.257	1.3	1.364	1.3	1.227	1.274	0.177	0.122	0.171
									1.613	1.491	1.373	1.289	1.303	1.303	1.29	1.306	1.423	1.278	1.315	1.341	1.3	1.226	1.273	0.174	0.122	0.17				1.476	1.459	1.298	1.337	1.363	1.436	1.327	1.451		1.256	1.301	1.363	1.3	1.226	1.273	0.174	0.122	0.17
									1.619	1.467	1.37	1.288	1.303	1.303	1.289	1.307	1.421	1.281	1.316	1.341	1.299	1.226	1.274	0.171	0.122	0.17				1.476	1.46	1.297	1.335	1.364	1.436	1.328	1.454		1.255	1.3	1.363	1.299	1.226	1.274	0.171	0.122	0.17
									1.62	1.442	1.365	1.289	1.302	1.302	1.29	1.306	1.423	1.281	1.315	1.34	1.299	1.226	1.274	0.169	0.122	0.169				1.476	1.461	1.299	1.336	1.365	1.437	1.328	1.455		1.256	1.3	1.364	1.299	1.226	1.274	0.169	0.122	0.169
									1.623	1.417	1.363	1.287	1.302	1.302	1.291	1.303	1.417	1.282	1.314	1.34	1.298	1.226	1.273	0.167	0.122	0.169				1.475	1.463	1.298	1.336	1.366	1.437	1.33	1.456		1.257	1.3	1.365	1.298	1.226	1.273	0.167	0.122	0.169
									1.626	1.393	1.36	1.287	1.304	1.304	1.292	1.3	1.416	1.282	1.314	1.338	1.298	1.225	1.274	0.167	0.122	0.169				1.474	1.463	1.297	1.334	1.365	1.437	1.329	1.453		1.258	1.301	1.365	1.298	1.225	1.274	0.167	0.122	0.169
									1.627	1.364	1.358	1.288	1.306	1.306	1.291	1.299	1.415	1.281	1.313	1.339	1.298	1.225	1.275	0.163	0.122	0.168				1.473	1.466	1.296	1.332	1.362	1.437	1.328	1.452		1.258	1.302	1.362	1.298	1.225	1.275	0.163	0.122	0.168
								20	1.629	1.331	1.354	1.287	1.308	1.308	1.292	1.3	1.415	1.283	1.312	1.34	1.298	1.224	1.275	0.161	0.122	0.168			20	1.47	1.463	1.296	1.331	1.362	1.435	1.329	1.454		1.26	1.301	1.362	1.298	1.224	1.275	0.161	0.122	0.168
									1.63	1.297	1.35	1.287	1.309	1.309	1.292	1.3	1.416	1.284	1.311	1.34	1.298	1.224	1.275	0.159	0.122	0.168				1.47	1.463	1.293	1.331	1.36	1.435	1.329	1.453		1.262	1.303	1.359	1.298	1.224	1.275	0.159	0.122	0.168
									1.633	1.263	1.348	1.286	1.309	1.309	1.292	1.299	1.416	1.283	1.311	1.341	1.298	1.224	1.273	0.153	0.122	0.168				1.469	1.464	1.29	1.332	1.359	1.433	1.33	1.451		1.263	1.302	1.358	1.298	1.224	1.273	0.153	0.122	0.168
									1.633	1.23	1.346	1.289	1.307	1.307	1.291	1.299	1.417	1.28	1.311	1.341	1.298	1.224	1.272	0.15	0.122	0.167				1.468	1.466	1.29	1.331	1.359	1.436	1.328	1.447		1.262	1.301	1.358	1.298	1.224	1.272	0.15	0.122	0.167
									1.639	1.198	1.343	1.288	1.303	1.303	1.293	1.3	1.418	1.279	1.31	1.341	1.299	1.222	1.272	0.147	0.122	0.167				1.469	1.469	1.291	1.331	1.358	1.436	1.328	1.445		1.264	1.3	1.357	1.299	1.222	1.272	0.147	0.122	0.167
									1.642	1.167	1.34	1.289	1.3	1.3	1.296	1.302	1.419	1.278	1.311	1.342	1.299	1.222	1.271	0.145	0.121	0.167				1.469	1.468	1.288	1.332	1.358	1.436	1.329	1.443		1.264	1.3	1.356	1.299	1.222	1.271	0.145	0.121	0.167
									1.649	1.138	1.338	1.291	1.3	1.3	1.296	1.301	1.421	1.278	1.311	1.34	1.299	1.222	1.271	0.144	0.121	0.167				1.47	1.469	1.287	1.332	1.355	1.437	1.329	1.443		1.261	1.3	1.353	1.299	1.222	1.271	0.144	0.121	0.167
									1.653	1.114	1.332	1.292	1.298	1.298	1.296	1.303	1.42	1.276	1.31	1.341	1.3	1.222	1.271	0.143	0.121	0.167				1.469	1.471	1.287	1.332	1.354	1.437	1.329	1.444		1.259	1.3	1.352	1.3	1.222	1.271	0.143	0.121	0.167
									1.655	1.09	1.332	1.29	1.295	1.295	1.294	1.303	1.417	1.275	1.308	1.341	1.301	1.221	1.27	0.143	0.121	0.167				1.469	1.47	1.288	1.329	1.354	1.437	1.327	1.444		1.258	1.301	1.352	1.301	1.221	1.27	0.143	0.121	0.167
									1.657	1.072	1.329	1.29	1.295	1.295	1.295	1.302	1.416	1.274	1.308	1.34	1.301	1.221	1.272	0.142	0.121	0.166				1.47	1.47	1.288	1.327	1.355	1.436	1.325	1.443		1.258	1.301	1.352	1.301	1.221	1.272	0.142	0.121	0.166
									1.657	1.053	1.328	1.291	1.295	1.295	1.294	1.305	1.416	1.272	1.309	1.341	1.302	1.222	1.272	0.141	0.121	0.166				1.472	1.469	1.288	1.326	1.357	1.435	1.322	1.442		1.258	1.3	1.351	1.302	1.222	1.272	0.141	0.121	0.166
									1.658	1.038	1.327	1.289	1.296	1.296	1.294	1.307	1.417	1.271	1.31	1.341	1.301	1.222	1.273	0.14	0.121	0.166				1.472	1.468	1.287	1.326	1.356	1.433	1.32	1.443		1.257	1.301	1.35	1.301	1.222	1.273	0.14	0.121	0.166
									1.657	1.025	1.323	1.29	1.296	1.296	1.295	1.307	1.416	1.272	1.311	1.341	1.301	1.222	1.274	0.139	0.121	0.166				1.473	1.467	1.287	1.325	1.356	1.434	1.318	1.443		1.258	1.302	1.35	1.301	1.222	1.274	0.139	0.121	0.166
									1.659	1.011	1.321	1.287	1.297	1.297	1.292	1.305	1.416	1.271	1.313	1.341	1.302	1.222	1.274	0.138	0.121	0.166				1.474	1.465	1.286	1.324	1.354	1.433	1.316	1.443		1.258	1.301	1.349	1.302	1.222	1.274	0.138	0.121	0.166
									1.659	1.001	1.319	1.285	1.297	1.297	1.291	1.306	1.415	1.271	1.313	1.341	1.304	1.223	1.273	0.137	0.121	0.165				1.474	1.465	1.286	1.323	1.354	1.431	1.314	1.442		1.257	1.301	1.352	1.304	1.223	1.273	0.137	0.121	0.165
									1.66	0.988	1.319	1.284	1.296	1.296	1.29	1.307	1.412	1.27	1.313	1.34	1.304	1.222	1.273	0.137	0.121	0.165				1.474	1.463	1.285	1.322	1.352	1.43	1.313	1.442		1.257	1.303	1.352	1.304	1.222	1.273	0.137	0.121	0.165
									1.661	0.978	1.317	1.284	1.296	1.296	1.289	1.306	1.413	1.269	1.315	1.339	1.305	1.222	1.275	0.137	0.121	0.165				1.474	1.462	1.284	1.323	1.351	1.428	1.312	1.441		1.258	1.303	1.352	1.305	1.222	1.275	0.137	0.121	0.165
									1.66	0.968	1.316	1.284	1.297	1.297	1.288	1.307	1.414	1.269	1.314	1.339	1.305	1.223	1.273	0.135	0.121	0.165				1.474	1.464	1.283	1.324	1.351	1.428	1.312	1.442		1.26	1.301	1.35	1.305	1.223	1.273	0.135	0.121	0.165
									1.659	0.958	1.316	1.285	1.298	1.298	1.288	1.309	1.414	1.267	1.312	1.337	1.306	1.222	1.274	0.134	0.121	0.165				1.473	1.464	1.281	1.325	1.35	1.427	1.31	1.44		1.26	1.3	1.351	1.306	1.222	1.274	0.134	0.121	0.165
									1.66	0.951	1.317	1.283	1.3	1.3	1.29	1.309	1.414	1.267	1.311	1.336	1.308	1.222	1.275	0.133	0.121	0.165				1.47	1.465	1.281	1.325	1.352	1.426	1.31	1.44		1.26	1.298	1.349	1.308	1.222	1.275	0.133	0.121	0.165
									1.665	0.947	1.319	1.282	1.3	1.3	1.289	1.308	1.414	1.267	1.312	1.334	1.308	1.22	1.275	0.132	0.12	0.165				1.469	1.465	1.281	1.324	1.352	1.426	1.309	1.438		1.261	1.298	1.35	1.308	1.22	1.275	0.132	0.12	0.165
								21	1.667	0.94	1.319	1.28	1.301	1.301	1.287	1.308	1.413	1.266	1.31	1.332	1.31	1.22	1.274	0.132	0.12	0.164			21	1.471	1.465	1.28	1.324	1.351	1.425	1.309	1.437		1.261	1.297	1.35	1.31	1.22	1.274	0.132	0.12	0.164
									1.667	0.933	1.316	1.28	1.302	1.302	1.287	1.305	1.415	1.268	1.31	1.331	1.311	1.22	1.275	0.132	0.12	0.164				1.469	1.465	1.278	1.323	1.35	1.423	1.308	1.436		1.26	1.298	1.35	1.311	1.22	1.275	0.132	0.12	0.164
									1.672	0.927	1.316	1.281	1.3	1.3	1.289	1.303	1.417	1.269	1.311	1.329	1.312	1.22	1.277	0.132	0.12	0.163				1.467	1.464	1.279	1.321	1.35	1.422	1.307	1.434		1.261	1.298	1.35	1.312	1.22	1.277	0.132	0.12	0.163
									1.674	0.922	1.312	1.28	1.299	1.299	1.289	1.3	1.416	1.271	1.311	1.329	1.312	1.221	1.277	0.131	0.12	0.163				1.466	1.464	1.278	1.32	1.35	1.42	1.304	1.435		1.259	1.297	1.349	1.312	1.221	1.277	0.131	0.12	0.163
									1.675	0.917	1.306	1.278	1.299	1.299	1.287	1.3	1.414	1.27	1.311	1.33	1.313	1.221	1.277	0.13	0.12	0.163				1.466	1.463	1.277	1.321	1.347	1.42	1.302	1.433		1.258	1.299	1.35	1.313	1.221	1.277	0.13	0.12	0.163
									1.676	0.914	1.3	1.277	1.299	1.299	1.284	1.3	1.413	1.269	1.309	1.33	1.314	1.22	1.278	0.13	0.12	0.163				1.466	1.464	1.278	1.321	1.345	1.419	1.3	1.432		1.259	1.298	1.348	1.314	1.22	1.278	0.13	0.12	0.163
									1.676	0.908	1.299	1.277	1.3	1.3	1.283	1.299	1.411	1.269	1.309	1.33	1.313	1.22	1.278	0.129	0.12	0.163				1.465	1.464	1.276	1.32	1.342	1.417	1.296	1.429		1.262	1.299	1.35	1.313	1.22	1.278	0.129	0.12	0.163
									1.67	0.906	1.297	1.275	1.3	1.3	1.281	1.3	1.412	1.271	1.311	1.33	1.314	1.22	1.277	0.129	0.12	0.163				1.464	1.466	1.275	1.319	1.341	1.418	1.293	1.427		1.262	1.299	1.35	1.314	1.22	1.277	0.129	0.12	0.163
									1.659	0.905	1.294	1.276	1.3	1.3	1.28	1.302	1.415	1.27	1.31	1.327	1.316	1.222	1.276	0.129	0.12	0.162				1.464	1.465	1.274	1.319	1.34	1.419	1.29	1.425		1.263	1.298	1.348	1.316	1.222	1.276	0.129	0.12	0.162
									1.654	0.901	1.292	1.273	1.301	1.301	1.278	1.303	1.416	1.272	1.31	1.328	1.316	1.221	1.275	0.129	0.12	0.162				1.464	1.466	1.275	1.319	1.337	1.42	1.288	1.424		1.264	1.296	1.35	1.316	1.221	1.275	0.129	0.12	0.162
									1.651	0.899	1.29	1.276	1.303	1.303	1.277	1.305	1.42	1.27	1.31	1.327	1.318	1.221	1.277	0.129	0.12	0.162				1.463	1.466	1.277	1.32	1.34	1.42	1.284	1.423		1.262	1.296	1.348	1.318	1.221	1.277	0.129	0.12	0.162
									1.647	0.895	1.287	1.275	1.304	1.304	1.276	1.302	1.419	1.27	1.31	1.327	1.319	1.22	1.278	0.129	0.12	0.161				1.462	1.464	1.276	1.321	1.339	1.419	1.282	1.425		1.262	1.295	1.347	1.319	1.22	1.278	0.129	0.12	0.161
									1.641	0.895	1.285	1.275	1.306	1.306	1.274	1.304	1.418	1.271	1.308	1.328	1.321	1.22	1.278	0.129	0.12	0.161				1.462	1.467	1.279	1.32	1.337	1.418	1.278	1.422		1.263	1.294	1.345	1.321	1.22	1.278	0.129	0.12	0.161
									1.625	0.889	1.28	1.276	1.307	1.307	1.271	1.303	1.417	1.272	1.308	1.326	1.322	1.22	1.278	0.129	0.12	0.162				1.461	1.469	1.279	1.321	1.338	1.417	1.277	1.424		1.262	1.295	1.343	1.322	1.22	1.278	0.129	0.12	0.162
									1.617	0.89	1.276	1.278	1.307	1.307	1.269	1.301	1.419	1.271	1.308	1.324	1.323	1.219	1.277	0.129	0.12	0.162				1.459	1.469	1.28	1.32	1.339	1.417	1.277	1.424		1.264	1.294	1.345	1.323	1.219	1.277	0.129	0.12	0.162
									1.611	0.887	1.276	1.28	1.31	1.31	1.266	1.301	1.417	1.27	1.309	1.323	1.324	1.219	1.277	0.129	0.12	0.162				1.46	1.47	1.281	1.318	1.337	1.418	1.276	1.423		1.265	1.293	1.344	1.324	1.219	1.277	0.129	0.12	0.162
									1.602	0.887	1.274	1.28	1.309	1.309	1.267	1.3	1.42	1.269	1.308	1.323	1.324	1.219	1.275	0.128	0.12	0.162				1.46	1.47	1.282	1.318	1.337	1.418	1.273	1.422		1.266	1.294	1.344	1.324	1.219	1.275	0.128	0.12	0.162
									1.596	0.882	1.27	1.278	1.307	1.307	1.268	1.3	1.419	1.269	1.31	1.323	1.325	1.22	1.275	0.128	0.12	0.162				1.461	1.47	1.283	1.319	1.338	1.418	1.27	1.419		1.266	1.292	1.345	1.325	1.22	1.275	0.128	0.12	0.162
									1.59	0.88	1.272	1.274	1.303	1.303	1.268	1.301	1.418	1.269	1.312	1.322	1.326	1.219	1.276	0.128	0.12	0.162				1.46	1.468	1.284	1.319	1.338	1.414	1.266	1.419		1.265	1.292	1.345	1.326	1.219	1.276	0.128	0.12	0.162
									1.577	0.881	1.268	1.271	1.303	1.303	1.271	1.303	1.417	1.269	1.315	1.319	1.327	1.218	1.275	0.128	0.12	0.162				1.458	1.469	1.286	1.319	1.337	1.414	1.264	1.418		1.266	1.293	1.344	1.327	1.218	1.275	0.128	0.12	0.162
									1.563	0.878	1.267	1.27	1.302	1.302	1.271	1.306	1.421	1.268	1.315	1.32	1.328	1.217	1.273	0.128	0.12	0.162				1.457	1.47	1.285	1.319	1.337	1.412	1.261	1.416		1.266	1.293	1.344	1.328	1.217	1.273	0.128	0.12	0.162
								22	1.545	0.877	1.269	1.268	1.301	1.301	1.271	1.305	1.422	1.269	1.316	1.317	1.331	1.217	1.271	0.128	0.12	0.162			22	1.455	1.473	1.287	1.32	1.337	1.412	1.257	1.415		1.268	1.292	1.343	1.331	1.217	1.271	0.128	0.12	0.162
									1.525	0.874	1.269	1.265	1.301	1.301	1.271	1.306	1.423	1.267	1.317	1.315	1.332	1.216	1.27	0.128	0.12	0.162				1.454	1.474	1.286	1.32	1.336	1.411	1.254	1.416		1.27	1.291	1.341	1.332	1.216	1.27	0.128	0.12	0.162
									1.5	0.873	1.27	1.264	1.301	1.301	1.272	1.306	1.422	1.266	1.319	1.318	1.333	1.214	1.27	0.128	0.12	0.162				1.452	1.477	1.286	1.321	1.335	1.411	1.253	1.418		1.272	1.292	1.338	1.333	1.214	1.27	0.128	0.12	0.162
									1.471	0.872	1.273	1.263	1.303	1.303	1.273	1.307	1.423	1.264	1.319	1.317	1.335	1.214	1.27	0.128	0.12	0.162				1.453	1.478	1.285	1.321	1.337	1.412	1.25	1.419		1.275	1.289	1.337	1.335	1.214	1.27	0.128	0.12	0.162
									1.441	0.869	1.274	1.26	1.306	1.306	1.273	1.309	1.422	1.262	1.321	1.317	1.336	1.212	1.27	0.128	0.12	0.162				1.451	1.479	1.284	1.318	1.336	1.414	1.245	1.419		1.275	1.29	1.339	1.336	1.212	1.27	0.128	0.12	0.162
									1.418	0.863	1.275	1.259	1.309	1.309	1.272	1.311	1.421	1.259	1.322	1.314	1.336	1.213	1.269	0.128	0.12	0.162				1.451	1.479	1.284	1.316	1.335	1.413	1.242	1.421		1.276	1.29	1.34	1.336	1.213	1.269	0.128	0.12	0.162
									1.393	0.856	1.277	1.256	1.308	1.308	1.271	1.31	1.42	1.257	1.32	1.315	1.337	1.211	1.272	0.128	0.12	0.162				1.448	1.479	1.284	1.316	1.333	1.413	1.24	1.42		1.276	1.29	1.339	1.337	1.211	1.272	0.128	0.12	0.162
									1.362	0.847	1.278	1.256	1.307	1.307	1.272	1.31	1.417	1.256	1.318	1.312	1.338	1.211	1.274	0.128	0.12	0.162				1.447	1.479	1.284	1.313	1.335	1.412	1.237	1.417		1.276	1.291	1.336	1.338	1.211	1.274	0.128	0.12	0.162
									1.326	0.846	1.279	1.255	1.306	1.306	1.272	1.314	1.417	1.253	1.319	1.309	1.34	1.212	1.274	0.128	0.12	0.162				1.446	1.479	1.284	1.315	1.334	1.41	1.234	1.416		1.276	1.29	1.336	1.34	1.212	1.274	0.128	0.12	0.162
									1.291	0.842	1.281	1.255	1.304	1.304	1.272	1.316	1.418	1.252	1.319	1.309	1.342	1.21	1.274	0.128	0.12	0.162				1.446	1.479	1.284	1.313	1.334	1.412	1.232	1.413		1.275	1.288	1.337	1.342	1.21	1.274	0.128	0.12	0.162
									1.264	0.844	1.284	1.253	1.302	1.302	1.27	1.314	1.414	1.25	1.32	1.308	1.344	1.21	1.277	0.128	0.12	0.162				1.446	1.478	1.285	1.313	1.336	1.411	1.23	1.414		1.274	1.286	1.339	1.344	1.21	1.277	0.128	0.12	0.162
									1.237	0.844	1.288	1.253	1.302	1.302	1.268	1.315	1.411	1.246	1.321	1.307	1.346	1.21	1.276	0.128	0.12	0.162				1.445	1.478	1.283	1.314	1.339	1.41	1.229	1.413		1.275	1.287	1.337	1.346	1.21	1.276	0.128	0.12	0.162
									1.208	0.843	1.289	1.253	1.301	1.301	1.268	1.313	1.408	1.246	1.321	1.306	1.349	1.211	1.274	0.128	0.12	0.162				1.443	1.477	1.282	1.313	1.341	1.408	1.229	1.413		1.276	1.287	1.338	1.349	1.211	1.274	0.128	0.12	0.162
									1.177	0.841	1.291	1.251	1.299	1.299	1.267	1.315	1.408	1.242	1.323	1.302	1.351	1.21	1.274	0.128	0.12	0.162				1.442	1.476	1.281	1.312	1.339	1.408	1.226	1.414		1.277	1.285	1.337	1.351	1.21	1.274	0.128	0.12	0.162
									1.147	0.84	1.294	1.251	1.3	1.3	1.265	1.316	1.409	1.242	1.326	1.301	1.354	1.209	1.273	0.128	0.12	0.162				1.44	1.477	1.28	1.311	1.339	1.408	1.224	1.414		1.277	1.284	1.333	1.354	1.209	1.273	0.128	0.12	0.162
									1.116	0.841	1.296	1.252	1.299	1.299	1.265	1.319	1.408	1.239	1.325	1.298	1.355	1.209	1.271	0.128	0.12	0.162				1.438	1.479	1.281	1.31	1.336	1.405	1.222	1.415		1.279	1.283	1.333	1.355	1.209	1.271	0.128	0.12	0.162
									1.089	0.841	1.299	1.252	1.298	1.298	1.265	1.321	1.411	1.239	1.324	1.297	1.357	1.209	1.272	0.128	0.12	0.162				1.437	1.479	1.277	1.308	1.334	1.402	1.221	1.416		1.28	1.281	1.332	1.357	1.209	1.272	0.128	0.12	0.162
									1.064	0.843	1.299	1.252	1.297	1.297	1.263	1.323	1.412	1.237	1.322	1.296	1.357	1.208	1.271	0.128	0.12	0.162				1.437	1.479	1.278	1.306	1.332	1.403	1.219	1.416		1.282	1.28	1.332	1.357	1.208	1.271	0.128	0.12	0.162
									1.037	0.844	1.301	1.251	1.295	1.295	1.264	1.324	1.41	1.236	1.322	1.294	1.358	1.209	1.271	0.128	0.12	0.162				1.433	1.479	1.276	1.305	1.331	1.401	1.219	1.415		1.284	1.281	1.332	1.358	1.209	1.271	0.128	0.12	0.162
									1.008	0.847	1.304	1.253	1.294	1.294	1.263	1.326	1.41	1.235	1.321	1.294	1.36	1.21	1.272	0.128	0.12	0.162				1.43	1.481	1.276	1.307	1.328	1.402	1.218	1.417		1.288	1.28	1.334	1.36	1.21	1.272	0.128	0.12	0.162
									0.983	0.843	1.306	1.254	1.294	1.294	1.262	1.328	1.409	1.234	1.322	1.294	1.361	1.21	1.275	0.128	0.12	0.162				1.428	1.481	1.275	1.307	1.328	1.403	1.216	1.416		1.292	1.281	1.333	1.361	1.21	1.275	0.128	0.12	0.162
								23	0.958	0.844	1.31	1.255	1.295	1.295	1.261	1.326	1.41	1.234	1.324	1.292	1.362	1.211	1.275	0.128	0.12	0.162			23	1.425	1.481	1.275	1.308	1.327	1.4	1.215	1.417		1.294	1.28	1.33	1.362	1.211	1.275	0.128	0.12	0.162
									0.932	0.846	1.312	1.254	1.294	1.294	1.263	1.327	1.409	1.233	1.322	1.291	1.364	1.211	1.278	0.128	0.12	0.162				1.424	1.481	1.275	1.307	1.323	1.401	1.215	1.415		1.294	1.28	1.331	1.364	1.211	1.278	0.128	0.12	0.162
									0.905	0.844	1.315	1.254	1.295	1.295	1.263	1.326	1.407	1.232	1.324	1.289	1.365	1.21	1.28	0.128	0.12	0.162				1.424	1.479	1.272	1.305	1.323	1.4	1.216	1.414		1.295	1.282	1.328	1.365	1.21	1.28	0.128	0.12	0.162
									0.877	0.844	1.316	1.255	1.297	1.297	1.264	1.327	1.407	1.229	1.326	1.286	1.366	1.21	1.28	0.128	0.12	0.162				1.424	1.478	1.27	1.304	1.323	1.397	1.213	1.414		1.297	1.282	1.327	1.366	1.21	1.28	0.128	0.12	0.162
									0.853	0.844	1.315	1.254	1.294	1.294	1.265	1.327	1.408	1.227	1.325	1.283	1.366	1.211	1.282	0.128	0.12	0.162				1.423	1.478	1.267	1.302	1.321	1.394	1.212	1.415		1.299	1.279	1.325	1.366	1.211	1.282	0.128	0.12	0.162
									0.827	0.845	1.322	1.252	1.293	1.293	1.269	1.332	1.406	1.225	1.324	1.281	1.368	1.212	1.28	0.128	0.12	0.162				1.422	1.477	1.264	1.303	1.321	1.393	1.213	1.413		1.3	1.279	1.324	1.368	1.212	1.28	0.128	0.12	0.162
									0.797	0.85	1.327	1.253	1.292	1.292	1.27	1.337	1.404	1.224	1.322	1.278	1.369	1.212	1.282	0.128	0.12	0.162				1.418	1.476	1.264	1.299	1.321	1.388	1.212	1.413		1.301	1.281	1.325	1.369	1.212	1.282	0.128	0.12	0.162
									0.767	0.853	1.331	1.254	1.291	1.291	1.272	1.337	1.404	1.222	1.322	1.278	1.369	1.211	1.282	0.128	0.12	0.162				1.416	1.478	1.261	1.298	1.32	1.385	1.21	1.415		1.302	1.279	1.322	1.369	1.211	1.282	0.128	0.12	0.162
									0.737	0.852	1.331	1.254	1.29	1.29	1.275	1.34	1.404	1.222	1.321	1.275	1.37	1.21	1.281	0.128	0.12	0.162				1.414	1.48	1.259	1.295	1.32	1.385	1.208	1.415		1.304	1.278	1.322	1.37	1.21	1.281	0.128	0.12	0.162
									0.71	0.848	1.335	1.254	1.29	1.29	1.277	1.343	1.403	1.219	1.319	1.273	1.372	1.209	1.282	0.128	0.12	0.162				1.413	1.479	1.259	1.293	1.319	1.385	1.208	1.413		1.305	1.277	1.322	1.372	1.209	1.282	0.128	0.12	0.162
									0.677	0.85	1.341	1.254	1.291	1.291	1.28	1.344	1.402	1.217	1.319	1.274	1.375	1.208	1.285	0.128	0.12	0.162				1.41	1.478	1.259	1.291	1.32	1.386	1.207	1.412		1.309	1.276	1.321	1.375	1.208	1.285	0.128	0.12	0.162
									0.648	0.85	1.341	1.254	1.289	1.289	1.28	1.345	1.399	1.216	1.316	1.271	1.378	1.208	1.284	0.128	0.12	0.162				1.409	1.476	1.257	1.291	1.319	1.387	1.208	1.413		1.31	1.273	1.319	1.378	1.208	1.284	0.128	0.12	0.162
									0.623	0.846	1.347	1.253	1.287	1.287	1.282	1.345	1.396	1.214	1.313	1.271	1.379	1.207	1.283	0.128	0.121	0.162				1.406	1.476	1.259	1.29	1.316	1.388	1.208	1.41		1.312	1.272	1.317	1.379	1.207	1.283	0.128	0.121	0.162
									0.599	0.85	1.353	1.252	1.287	1.287	1.281	1.346	1.396	1.212	1.312	1.27	1.381	1.207	1.284	0.128	0.121	0.162				1.404	1.474	1.258	1.29	1.314	1.387	1.207	1.408		1.313	1.271	1.315	1.381	1.207	1.284	0.128	0.121	0.162
									0.574	0.851	1.352	1.252	1.288	1.288	1.282	1.346	1.397	1.211	1.311	1.269	1.382	1.207	1.284	0.128	0.121	0.162				1.401	1.474	1.257	1.288	1.315	1.386	1.206	1.407		1.314	1.272	1.315	1.382	1.207	1.284	0.128	0.121	0.162
									0.551	0.849	1.355	1.252	1.288	1.288	1.286	1.348	1.396	1.209	1.313	1.269	1.383	1.207	1.286	0.128	0.121	0.162				1.402	1.472	1.256	1.289	1.315	1.384	1.207	1.409		1.317	1.274	1.314	1.383	1.207	1.286	0.128	0.121	0.162
									0.532	0.848	1.358	1.249	1.288	1.288	1.29	1.35	1.393	1.207	1.314	1.267	1.383	1.206	1.289	0.128	0.121	0.162				1.399	1.472	1.254	1.289	1.315	1.381	1.207	1.406		1.317	1.276	1.313	1.383	1.206	1.289	0.128	0.121	0.162
									0.511	0.847	1.357	1.249	1.29	1.29	1.295	1.351	1.393	1.205	1.314	1.265	1.385	1.206	1.291	0.129	0.121	0.162				1.398	1.472	1.253	1.291	1.318	1.383	1.206	1.409		1.318	1.276	1.312	1.385	1.206	1.291	0.129	0.121	0.162
									0.492	0.844	1.36	1.252	1.292	1.292	1.298	1.353	1.392	1.201	1.314	1.264	1.387	1.204	1.292	0.129	0.121	0.162				1.399	1.471	1.251	1.292	1.317	1.38	1.206	1.408		1.32	1.278	1.31	1.387	1.204	1.292	0.129	0.121	0.162
									0.475	0.843	1.361	1.249	1.294	1.294	1.302	1.354	1.39	1.2	1.316	1.262	1.39	1.204	1.294	0.129	0.121	0.162				1.396	1.47	1.248	1.291	1.318	1.378	1.206	1.408		1.321	1.278	1.311	1.39	1.204	1.294	0.129	0.121	0.162
									0.459	0.842	1.367	1.249	1.293	1.293	1.305	1.355	1.39	1.198	1.316	1.264	1.391	1.204	1.292	0.129	0.121	0.162				1.395	1.47	1.246	1.29	1.319	1.374	1.206	1.41		1.323	1.277	1.313	1.391	1.204	1.292	0.129	0.121	0.162
								24	0.444	0.842	1.37	1.249	1.293	1.293	1.309	1.357	1.391	1.197	1.315	1.262	1.392	1.204	1.293	0.129	0.121	0.162			24	1.393	1.469	1.243	1.29	1.319	1.372	1.205	1.409		1.324	1.277	1.316	1.392	1.204	1.293	0.129	0.121	0.162
									0.429	0.841	1.374	1.249	1.294	1.294	1.312	1.357	1.389	1.195	1.315	1.263	1.393	1.203	1.292	0.129	0.121	0.162				1.393	1.467	1.24	1.29	1.319	1.369	1.206	1.408		1.327	1.275	1.315	1.393	1.203	1.292	0.129	0.121	0.162
									0.412	0.84	1.379	1.249	1.291	1.291	1.315	1.358	1.387	1.195	1.317	1.263	1.394	1.202	1.294	0.129	0.121	0.162				1.393	1.466	1.238	1.289	1.32	1.366	1.206	1.406		1.327	1.277	1.315	1.394	1.202	1.294	0.129	0.121	0.162
									0.395	0.838	1.377	1.249	1.295	1.295	1.316	1.355	1.387	1.193	1.315	1.264	1.396	1.201	1.293	0.129	0.121	0.162				1.396	1.466	1.237	1.289	1.322	1.364	1.204	1.405		1.329	1.275	1.313	1.396	1.201	1.293	0.129	0.121	0.162
									0.381	0.842	1.378	1.248	1.297	1.297	1.32	1.354	1.39	1.192	1.314	1.265	1.397	1.2	1.294	0.129	0.121	0.162				1.395	1.465	1.234	1.29	1.324	1.361	1.203	1.405		1.332	1.275	1.312	1.397	1.2	1.294	0.129	0.121	0.162
									0.368	0.841	1.377	1.249	1.299	1.299	1.322	1.354	1.388	1.19	1.316	1.266	1.399	1.199	1.294	0.129	0.121	0.162				1.396	1.462	1.231	1.291	1.323	1.36	1.202	1.405		1.335	1.276	1.312	1.399	1.199	1.294	0.129	0.121	0.162
									0.355	0.841	1.379	1.25	1.302	1.302	1.325	1.355	1.387	1.186	1.315	1.266	1.4	1.198	1.293	0.129	0.121	0.162				1.396	1.463	1.227	1.293	1.321	1.359	1.203	1.405		1.337	1.275	1.309	1.4	1.198	1.293	0.129	0.121	0.162
									0.343	0.839	1.378	1.252	1.304	1.304	1.326	1.354	1.384	1.181	1.312	1.264	1.402	1.198	1.293	0.129	0.121	0.162				1.395	1.462	1.221	1.295	1.323	1.358	1.203	1.404		1.337	1.275	1.306	1.402	1.198	1.293	0.129	0.121	0.162
									0.331	0.837	1.376	1.253	1.304	1.304	1.326	1.353	1.381	1.178	1.314	1.264	1.404	1.196	1.294	0.129	0.121	0.162				1.395	1.462	1.218	1.296	1.321	1.356	1.202	1.402		1.337	1.273	1.303	1.404	1.196	1.294	0.129	0.121	0.162
									0.32	0.838	1.374	1.252	1.306	1.306	1.331	1.355	1.381	1.175	1.312	1.266	1.405	1.196	1.294	0.129	0.121	0.162				1.398	1.461	1.215	1.297	1.322	1.355	1.203	1.4		1.339	1.272	1.303	1.405	1.196	1.294	0.129	0.121	0.162
									0.31	0.838	1.369	1.252	1.308	1.308	1.333	1.356	1.38	1.173	1.312	1.266	1.407	1.195	1.296	0.129	0.121	0.162				1.401	1.46	1.212	1.3	1.322	1.354	1.202	1.399		1.342	1.27	1.302	1.407	1.195	1.296	0.129	0.121	0.162
									0.3	0.838	1.367	1.252	1.308	1.308	1.337	1.359	1.379	1.173	1.31	1.264	1.408	1.193	1.297	0.129	0.121	0.162				1.401	1.458	1.211	1.301	1.325	1.354	1.202	1.399		1.343	1.271	1.3	1.408	1.193	1.297	0.129	0.121	0.162
									0.291	0.838	1.362	1.252	1.307	1.307	1.339	1.361	1.38	1.17	1.312	1.264	1.41	1.192	1.3	0.129	0.121	0.162				1.401	1.457	1.211	1.302	1.324	1.351	1.203	1.398		1.345	1.272	1.297	1.41	1.192	1.3	0.129	0.121	0.162
									0.283	0.839	1.356	1.252	1.309	1.309	1.341	1.362	1.38	1.167	1.311	1.263	1.411	1.191	1.301	0.129	0.121	0.162				1.401	1.456	1.208	1.304	1.323	1.348	1.202	1.395		1.349	1.273	1.296	1.411	1.191	1.301	0.129	0.121	0.162
									0.275	0.838	1.353	1.251	1.312	1.312	1.342	1.364	1.383	1.166	1.311	1.26	1.412	1.189	1.302	0.129	0.121	0.162				1.403	1.453	1.207	1.305	1.322	1.345	1.205	1.395		1.348	1.272	1.296	1.412	1.189	1.302	0.129	0.121	0.162
									0.267	0.838	1.35	1.252	1.309	1.309	1.344	1.365	1.384	1.163	1.311	1.257	1.413	1.187	1.302	0.129	0.121	0.162				1.404	1.451	1.205	1.306	1.321	1.346	1.208	1.394		1.349	1.273	1.293	1.413	1.187	1.302	0.129	0.121	0.162
									0.261	0.839	1.347	1.251	1.309	1.309	1.347	1.368	1.382	1.161	1.31	1.257	1.414	1.187	1.304	0.129	0.121	0.162				1.407	1.45	1.205	1.309	1.322	1.345	1.208	1.393		1.348	1.272	1.29	1.414	1.187	1.304	0.129	0.121	0.162
									0.254	0.838	1.347	1.25	1.307	1.307	1.351	1.369	1.38	1.159	1.312	1.257	1.414	1.186	1.303	0.129	0.121	0.162				1.409	1.447	1.206	1.312	1.321	1.344	1.21	1.392		1.348	1.272	1.289	1.414	1.186	1.303	0.129	0.121	0.162
									0.249	0.837	1.349	1.25	1.305	1.305	1.353	1.367	1.38	1.161	1.31	1.256	1.415	1.186	1.303	0.129	0.121	0.162				1.409	1.447	1.205	1.316	1.322	1.343	1.21	1.391		1.349	1.271	1.289	1.415	1.186	1.303	0.129	0.121	0.162
									0.244	0.841	1.348	1.25	1.3	1.3	1.355	1.366	1.378	1.16	1.309	1.254	1.416	1.186	1.303	0.129	0.121	0.162				1.413	1.445	1.204	1.317	1.32	1.343	1.211	1.389		1.351	1.272	1.288	1.416	1.186	1.303	0.129	0.121	0.162
									0.238	0.843	1.343	1.25	1.298	1.298	1.356	1.366	1.376	1.16	1.309	1.251	1.416	1.185	1.304	0.129	0.121	0.162				1.415	1.443	1.202	1.319	1.32	1.345	1.211	1.387		1.352	1.271	1.286	1.416	1.185	1.304	0.129	0.121	0.162
								25	0.234	0.843	1.343	1.251	1.295	1.295	1.355	1.367	1.378	1.158	1.309	1.249	1.417	1.185	1.305	0.129	0.121	0.162			25	1.415	1.445	1.2	1.325	1.319	1.347	1.211	1.383		1.351	1.271	1.284	1.417	1.185	1.305	0.129	0.121	0.162
									0.229	0.845	1.343	1.251	1.297	1.297	1.357	1.367	1.379	1.153	1.308	1.244	1.419	1.183	1.304	0.129	0.121	0.162				1.418	1.441	1.198	1.329	1.319	1.346	1.214	1.38		1.353	1.27	1.282	1.419	1.183	1.304	0.129	0.121	0.162
									0.225	0.846	1.336	1.25	1.297	1.297	1.357	1.369	1.38	1.151	1.312	1.243	1.42	1.183	1.303	0.129	0.121	0.162				1.42	1.441	1.197	1.334	1.32	1.346	1.215	1.38		1.354	1.272	1.282	1.42	1.183	1.303	0.129	0.121	0.162
									0.221	0.847	1.332	1.251	1.297	1.297	1.356	1.367	1.376	1.149	1.311	1.24	1.421	1.183	1.303	0.129	0.121	0.162				1.421	1.441	1.197	1.34	1.319	1.347	1.217	1.38		1.357	1.274	1.281	1.421	1.183	1.303	0.129	0.121	0.162
									0.217	0.85	1.33	1.25	1.293	1.293	1.357	1.368	1.377	1.148	1.312	1.237	1.422	1.183	1.301	0.129	0.121	0.162				1.424	1.441	1.198	1.345	1.319	1.347	1.219	1.381		1.357	1.274	1.282	1.422	1.183	1.301	0.129	0.121	0.162
									0.213	0.85	1.323	1.251	1.293	1.293	1.358	1.368	1.38	1.148	1.312	1.235	1.425	1.183	1.304	0.129	0.121	0.162				1.427	1.44	1.198	1.353	1.318	1.348	1.219	1.382		1.358	1.274	1.281	1.425	1.183	1.304	0.129	0.121	0.162
									0.21	0.849	1.316	1.251	1.294	1.294	1.358	1.368	1.376	1.145	1.311	1.234	1.426	1.182	1.303	0.129	0.121	0.162				1.427	1.439	1.198	1.358	1.32	1.348	1.22	1.385		1.358	1.273	1.282	1.426	1.182	1.303	0.129	0.121	0.162
									0.207	0.851	1.313	1.251	1.293	1.293	1.353	1.37	1.375	1.142	1.311	1.233	1.427	1.181	1.303	0.129	0.121	0.162				1.429	1.437	1.198	1.362	1.321	1.349	1.219	1.384		1.359	1.273	1.281	1.427	1.181	1.303	0.129	0.121	0.162
									0.203	0.851	1.311	1.251	1.293	1.293	1.352	1.371	1.373	1.14	1.309	1.229	1.429	1.18	1.304	0.129	0.121	0.162				1.428	1.435	1.198	1.366	1.319	1.35	1.221	1.386		1.359	1.272	1.278	1.429	1.18	1.304	0.129	0.121	0.162
									0.2	0.853	1.31	1.25	1.293	1.293	1.353	1.372	1.37	1.139	1.312	1.227	1.431	1.178	1.302	0.129	0.121	0.162				1.43	1.433	1.196	1.37	1.321	1.353	1.222	1.387		1.359	1.271	1.276	1.431	1.178	1.302	0.129	0.121	0.162
									0.198	0.858	1.305	1.251	1.294	1.294	1.354	1.374	1.367	1.137	1.31	1.224	1.432	1.178	1.303	0.129	0.121	0.162				1.43	1.431	1.195	1.374	1.322	1.355	1.223	1.388		1.359	1.269	1.277	1.432	1.178	1.303	0.129	0.121	0.162
									0.195	0.857	1.299	1.249	1.295	1.295	1.352	1.375	1.367	1.134	1.309	1.223	1.433	1.177	1.302	0.129	0.121	0.162				1.43	1.43	1.194	1.379	1.322	1.355	1.224	1.388		1.361	1.27	1.274	1.433	1.177	1.302	0.129	0.121	0.162
									0.192	0.855	1.291	1.252	1.292	1.292	1.35	1.376	1.367	1.132	1.31	1.22	1.436	1.176	1.304	0.129	0.121	0.162				1.43	1.428	1.194	1.381	1.322	1.352	1.227	1.389		1.36	1.266	1.273	1.436	1.176	1.304	0.129	0.121	0.162
									0.19	0.855	1.287	1.253	1.292	1.292	1.351	1.378	1.369	1.131	1.31	1.217	1.437	1.176	1.304	0.129	0.121	0.162				1.431	1.425	1.193	1.382	1.321	1.351	1.226	1.392		1.36	1.265	1.274	1.437	1.176	1.304	0.129	0.121	0.162
									0.187	0.858	1.281	1.254	1.293	1.293	1.35	1.379	1.368	1.131	1.308	1.213	1.439	1.176	1.304	0.129	0.121	0.162				1.431	1.425	1.193	1.388	1.32	1.35	1.226	1.391		1.361	1.266	1.273	1.439	1.176	1.304	0.129	0.121	0.162
									0.186	0.858	1.27	1.254	1.292	1.292	1.346	1.379	1.367	1.133	1.307	1.214	1.441	1.176	1.303	0.129	0.121	0.162				1.434	1.424	1.19	1.391	1.318	1.349	1.225	1.389		1.361	1.265	1.273	1.441	1.176	1.303	0.129	0.121	0.162
									0.183	0.859	1.264	1.255	1.292	1.292	1.343	1.379	1.367	1.133	1.303	1.211	1.443	1.175	1.303	0.129	0.121	0.162				1.434	1.422	1.19	1.393	1.317	1.346	1.222	1.387		1.362	1.263	1.27	1.443	1.175	1.303	0.129	0.121	0.162
									0.18	0.861	1.258	1.256	1.293	1.293	1.339	1.381	1.368	1.132	1.302	1.209	1.445	1.175	1.305	0.129	0.121	0.162				1.434	1.421	1.19	1.396	1.317	1.345	1.222	1.384		1.363	1.263	1.271	1.445	1.175	1.305	0.129	0.121	0.162
									0.178	0.86	1.249	1.257	1.291	1.291	1.338	1.381	1.365	1.133	1.3	1.207	1.447	1.174	1.305	0.129	0.121	0.162				1.434	1.419	1.186	1.399	1.317	1.346	1.22	1.384		1.363	1.262	1.271	1.447	1.174	1.305	0.129	0.121	0.162
									0.176	0.859	1.24	1.26	1.29	1.29	1.336	1.381	1.365	1.136	1.301	1.204	1.449	1.175	1.307	0.129	0.121	0.162				1.432	1.418	1.183	1.406	1.318	1.346	1.221	1.384		1.361	1.261	1.269	1.449	1.175	1.307	0.129	0.121	0.162
									0.174	0.858	1.234	1.261	1.289	1.289	1.334	1.379	1.366	1.136	1.299	1.204	1.448	1.175	1.308	0.129	0.121	0.162				1.435	1.416	1.182	1.408	1.32	1.345	1.224	1.383		1.36	1.261	1.269	1.448	1.175	1.308	0.129	0.121	0.162
								26	0.171	0.857	1.228	1.26	1.289	1.289	1.334	1.379	1.364	1.135	1.298	1.204	1.449	1.175	1.308	0.129	0.121	0.162			26	1.435	1.416	1.18	1.41	1.319	1.346	1.226	1.385		1.358	1.259	1.268	1.449	1.175	1.308	0.129	0.121	0.162
									0.169	0.856	1.216	1.259	1.289	1.289	1.329	1.379	1.362	1.136	1.296	1.205	1.45	1.175	1.307	0.129	0.121	0.162				1.436	1.417	1.177	1.412	1.319	1.346	1.226	1.384		1.357	1.259	1.268	1.45	1.175	1.307	0.129	0.121	0.162
									0.168	0.857	1.212	1.261	1.291	1.291	1.325	1.378	1.36	1.138	1.294	1.203	1.453	1.174	1.308	0.129	0.121	0.162				1.433	1.415	1.174	1.416	1.319	1.348	1.225	1.386		1.357	1.258	1.268	1.453	1.174	1.308	0.129	0.121	0.162
									0.166	0.855	1.2	1.263	1.29	1.29	1.321	1.377	1.357	1.137	1.293	1.204	1.454	1.173	1.306	0.129	0.121	0.162				1.432	1.414	1.172	1.418	1.318	1.347	1.224	1.386		1.358	1.257	1.266	1.454	1.173	1.306	0.129	0.121	0.162
									0.165	0.855	1.192	1.266	1.288	1.288	1.32	1.377	1.358	1.14	1.292	1.204	1.454	1.173	1.309	0.129	0.121	0.162				1.432	1.413	1.171	1.422	1.319	1.346	1.226	1.383		1.356	1.257	1.265	1.454	1.173	1.309	0.129	0.121	0.162
									0.164	0.853	1.181	1.27	1.287	1.287	1.318	1.379	1.36	1.14	1.292	1.204	1.456	1.17	1.309	0.129	0.121	0.162				1.434	1.411	1.17	1.425	1.316	1.345	1.225	1.379		1.356	1.258	1.263	1.456	1.17	1.309	0.129	0.121	0.162
									0.163	0.854	1.168	1.272	1.29	1.29	1.313	1.379	1.36	1.141	1.292	1.203	1.46	1.17	1.311	0.129	0.121	0.162				1.436	1.411	1.166	1.427	1.312	1.344	1.224	1.377		1.357	1.26	1.258	1.46	1.17	1.311	0.129	0.121	0.162
									0.162	0.85	1.154	1.275	1.291	1.291	1.31	1.377	1.36	1.142	1.292	1.201	1.46	1.169	1.311	0.129	0.121	0.162				1.434	1.409	1.164	1.431	1.313	1.344	1.226	1.379		1.358	1.26	1.258	1.46	1.169	1.311	0.129	0.121	0.162
									0.16	0.848	1.139	1.277	1.294	1.294	1.313	1.374	1.36	1.144	1.291	1.2	1.461	1.168	1.31	0.129	0.121	0.162				1.434	1.408	1.163	1.435	1.311	1.342	1.229	1.379		1.356	1.26	1.26	1.461	1.168	1.31	0.129	0.121	0.162
									0.159	0.848	1.127	1.278	1.295	1.295	1.312	1.375	1.361	1.144	1.29	1.199	1.459	1.166	1.311	0.129	0.121	0.162				1.435	1.407	1.16	1.435	1.311	1.342	1.23	1.378		1.355	1.261	1.257	1.459	1.166	1.311	0.129	0.121	0.162
									0.158	0.848	1.111	1.282	1.297	1.297	1.313	1.376	1.362	1.146	1.29	1.198	1.461	1.166	1.31	0.129	0.121	0.162				1.433	1.406	1.159	1.435	1.31	1.34	1.229	1.376		1.354	1.261	1.258	1.461	1.166	1.31	0.129	0.121	0.162
									0.157	0.848	1.097	1.288	1.299	1.299	1.31	1.376	1.362	1.148	1.291	1.197	1.462	1.164	1.31	0.129	0.121	0.162				1.432	1.404	1.156	1.436	1.307	1.338	1.233	1.375		1.352	1.26	1.257	1.462	1.164	1.31	0.129	0.121	0.162
									0.154	0.851	1.086	1.291	1.299	1.299	1.307	1.376	1.361	1.148	1.29	1.194	1.462	1.163	1.311	0.129	0.121	0.162				1.433	1.402	1.155	1.439	1.307	1.336	1.231	1.375		1.353	1.258	1.254	1.462	1.163	1.311	0.129	0.121	0.162
									0.152	0.854	1.071	1.29	1.3	1.3	1.308	1.374	1.358	1.148	1.29	1.193	1.463	1.162	1.31	0.129	0.121	0.162				1.434	1.401	1.154	1.44	1.305	1.334	1.228	1.375		1.352	1.259	1.254	1.463	1.162	1.31	0.129	0.121	0.162
									0.151	0.853	1.055	1.291	1.301	1.301	1.305	1.376	1.36	1.149	1.289	1.194	1.464	1.161	1.312	0.129	0.121	0.162				1.433	1.396	1.149	1.443	1.302	1.333	1.228	1.376		1.353	1.259	1.252	1.464	1.161	1.312	0.129	0.121	0.162
									0.15	0.854	1.039	1.292	1.301	1.301	1.306	1.376	1.359	1.149	1.287	1.194	1.464	1.159	1.31	0.129	0.121	0.162				1.434	1.391	1.146	1.442	1.3	1.331	1.229	1.377		1.353	1.258	1.251	1.464	1.159	1.31	0.129	0.121	0.162
									0.149	0.856	1.021	1.293	1.303	1.303	1.305	1.376	1.36	1.151	1.287	1.192	1.463	1.158	1.307	0.129	0.121	0.162				1.434	1.391	1.146	1.445	1.297	1.328	1.229	1.375		1.354	1.259	1.247	1.463	1.158	1.307	0.129	0.121	0.162
									0.148	0.856	1.006	1.295	1.306	1.306	1.303	1.374	1.357	1.153	1.286	1.189	1.462	1.158	1.305	0.129	0.121	0.162				1.432	1.389	1.145	1.447	1.294	1.329	1.23	1.373		1.353	1.26	1.244	1.462	1.158	1.305	0.129	0.121	0.162
									0.147	0.857	0.99	1.299	1.306	1.306	1.301	1.371	1.353	1.152	1.284	1.187	1.462	1.156	1.303	0.129	0.121	0.162				1.428	1.388	1.145	1.451	1.291	1.327	1.228	1.373		1.349	1.258	1.243	1.462	1.156	1.303	0.129	0.121	0.162
									0.146	0.863	0.973	1.3	1.307	1.307	1.3	1.371	1.354	1.152	1.282	1.186	1.463	1.155	1.302	0.129	0.121	0.162				1.426	1.385	1.143	1.451	1.289	1.327	1.229	1.374		1.353	1.256	1.239	1.463	1.155	1.302	0.129	0.121	0.162
									0.144	0.868	0.956	1.301	1.308	1.308	1.3	1.371	1.355	1.153	1.282	1.183	1.464	1.154	1.301	0.129	0.121	0.162				1.421	1.385	1.143	1.452	1.288	1.326	1.229	1.371		1.354	1.256	1.235	1.464	1.154	1.301	0.129	0.121	0.162
								27	0.143	0.87	0.941	1.301	1.306	1.306	1.3	1.37	1.353	1.152	1.281	1.181	1.465	1.153	1.298	0.129	0.121	0.162			27	1.415	1.381	1.14	1.452	1.288	1.325	1.227	1.371		1.355	1.257	1.233	1.465	1.153	1.298	0.129	0.121	0.162
									0.142	0.871	0.924	1.306	1.303	1.303	1.297	1.371	1.353	1.151	1.281	1.181	1.465	1.153	1.297	0.129	0.121	0.162				1.409	1.379	1.14	1.453	1.287	1.322	1.23	1.372		1.355	1.256	1.229	1.465	1.153	1.297	0.129	0.121	0.162
									0.142	0.874	0.911	1.309	1.302	1.302	1.294	1.37	1.352	1.151	1.28	1.179	1.465	1.152	1.297	0.129	0.121	0.161				1.408	1.376	1.138	1.454	1.286	1.32	1.229	1.374		1.355	1.254	1.226	1.465	1.152	1.297	0.129	0.121	0.161
									0.142	0.877	0.899	1.316	1.301	1.301	1.294	1.371	1.35	1.152	1.281	1.177	1.464	1.151	1.297	0.129	0.121	0.162				1.403	1.371	1.137	1.452	1.287	1.318	1.227	1.375		1.355	1.252	1.226	1.464	1.151	1.297	0.129	0.121	0.162
									0.141	0.878	0.881	1.323	1.302	1.302	1.291	1.371	1.35	1.154	1.278	1.175	1.465	1.15	1.295	0.129	0.121	0.161				1.395	1.368	1.136	1.454	1.288	1.319	1.227	1.372		1.354	1.253	1.227	1.465	1.15	1.295	0.129	0.121	0.161
									0.14	0.882	0.867	1.327	1.301	1.301	1.288	1.371	1.351	1.156	1.276	1.176	1.465	1.15	1.293	0.129	0.121	0.161				1.389	1.365	1.134	1.453	1.288	1.318	1.229	1.374		1.353	1.253	1.226	1.465	1.15	1.293	0.129	0.121	0.161
									0.14	0.886	0.851	1.332	1.298	1.298	1.285	1.371	1.35	1.159	1.273	1.174	1.466	1.149	1.294	0.129	0.121	0.161				1.383	1.36	1.13	1.45	1.286	1.314	1.23	1.373		1.352	1.255	1.226	1.466	1.149	1.294	0.129	0.121	0.161
									0.139	0.888	0.838	1.336	1.297	1.297	1.28	1.369	1.348	1.16	1.272	1.174	1.467	1.148	1.293	0.129	0.121	0.161				1.377	1.359	1.129	1.449	1.286	1.315	1.232	1.373		1.352	1.257	1.226	1.467	1.148	1.293	0.129	0.121	0.161
									0.138	0.894	0.825	1.34	1.296	1.296	1.276	1.368	1.349	1.164	1.27	1.173	1.468	1.146	1.292	0.13	0.121	0.161				1.373	1.356	1.128	1.448	1.286	1.314	1.233	1.372		1.348	1.259	1.224	1.468	1.146	1.292	0.13	0.121	0.161
									0.136	0.9	0.811	1.343	1.297	1.297	1.275	1.367	1.348	1.167	1.269	1.172	1.467	1.144	1.29	0.13	0.121	0.161				1.368	1.354	1.125	1.446	1.285	1.311	1.233	1.373		1.347	1.259	1.225	1.467	1.144	1.29	0.13	0.121	0.161
									0.135	0.905	0.8	1.345	1.298	1.298	1.273	1.368	1.345	1.167	1.27	1.168	1.468	1.143	1.29	0.13	0.121	0.161				1.364	1.353	1.124	1.444	1.288	1.309	1.234	1.374		1.345	1.259	1.222	1.468	1.143	1.29	0.13	0.121	0.161
									0.135	0.911	0.787	1.349	1.3	1.3	1.271	1.37	1.346	1.169	1.27	1.166	1.469	1.142	1.291	0.13	0.121	0.161				1.356	1.352	1.123	1.442	1.288	1.304	1.233	1.374		1.345	1.258	1.224	1.469	1.142	1.291	0.13	0.121	0.161
									0.134	0.917	0.772	1.354	1.3	1.3	1.27	1.369	1.344	1.172	1.27	1.164	1.47	1.142	1.291	0.13	0.121	0.161				1.347	1.352	1.121	1.44	1.293	1.303	1.234	1.375		1.344	1.258	1.223	1.47	1.142	1.291	0.13	0.121	0.161
									0.134	0.923	0.759	1.355	1.3	1.3	1.271	1.366	1.344	1.175	1.272	1.165	1.472	1.141	1.288	0.13	0.121	0.161				1.337	1.351	1.117	1.437	1.293	1.3	1.232	1.377		1.344	1.259	1.222	1.472	1.141	1.288	0.13	0.121	0.161
									0.133	0.925	0.747	1.357	1.302	1.302	1.268	1.365	1.341	1.178	1.271	1.167	1.473	1.139	1.289	0.13	0.121	0.161				1.332	1.348	1.119	1.433	1.291	1.299	1.234	1.374		1.344	1.259	1.218	1.473	1.139	1.289	0.13	0.121	0.161
									0.133	0.932	0.733	1.361	1.299	1.299	1.267	1.362	1.341	1.179	1.269	1.166	1.474	1.137	1.289	0.13	0.121	0.161				1.328	1.346	1.118	1.43	1.288	1.299	1.234	1.372		1.342	1.26	1.215	1.474	1.137	1.289	0.13	0.121	0.161
									0.133	0.933	0.72	1.365	1.3	1.3	1.272	1.36	1.34	1.178	1.269	1.165	1.475	1.136	1.289	0.13	0.121	0.161				1.32	1.344	1.118	1.429	1.285	1.301	1.235	1.37		1.34	1.26	1.214	1.475	1.136	1.289	0.13	0.121	0.161
									0.132	0.938	0.708	1.371	1.3	1.3	1.268	1.36	1.338	1.18	1.269	1.166	1.475	1.135	1.289	0.13	0.121	0.161				1.313	1.34	1.118	1.43	1.285	1.298	1.238	1.368		1.341	1.258	1.212	1.475	1.135	1.289	0.13	0.121	0.161
									0.132	0.94	0.694	1.377	1.298	1.298	1.266	1.356	1.336	1.182	1.269	1.165	1.474	1.132	1.289	0.13	0.121	0.161				1.308	1.338	1.116	1.425	1.284	1.295	1.241	1.364		1.342	1.257	1.21	1.474	1.132	1.289	0.13	0.121	0.161
									0.132	0.946	0.682	1.38	1.296	1.296	1.265	1.358	1.335	1.183	1.269	1.163	1.474	1.13	1.286	0.13	0.121	0.161				1.3	1.337	1.114	1.422	1.284	1.296	1.241	1.359		1.34	1.255	1.207	1.474	1.13	1.286	0.13	0.121	0.161
									0.131	0.947	0.668	1.382	1.296	1.296	1.263	1.358	1.334	1.182	1.269	1.163	1.474	1.13	1.283	0.13	0.121	0.161				1.289	1.337	1.111	1.42	1.282	1.293	1.242	1.356		1.341	1.254	1.201	1.474	1.13	1.283	0.13	0.121	0.161
								28	0.131	0.95	0.652	1.389	1.297	1.297	1.259	1.357	1.331	1.181	1.267	1.16	1.474	1.129	1.282	0.13	0.121	0.161			28	1.283	1.336	1.11	1.415	1.282	1.287	1.241	1.356		1.342	1.253	1.199	1.474	1.129	1.282	0.13	0.121	0.161
									0.131	0.948	0.637	1.394	1.295	1.295	1.257	1.355	1.33	1.181	1.269	1.162	1.474	1.128	1.282	0.13	0.121	0.161				1.275	1.332	1.108	1.411	1.28	1.282	1.241	1.355		1.342	1.254	1.198	1.474	1.128	1.282	0.13	0.121	0.161
									0.131	0.947	0.622	1.398	1.293	1.293	1.256	1.356	1.328	1.182	1.269	1.163	1.474	1.128	1.28	0.13	0.121	0.161				1.265	1.331	1.106	1.407	1.277	1.278	1.243	1.356		1.342	1.253	1.197	1.474	1.128	1.28	0.13	0.121	0.161
									0.13	0.949	0.607	1.403	1.29	1.29	1.255	1.357	1.33	1.182	1.267	1.159	1.476	1.127	1.279	0.13	0.121	0.161				1.256	1.33	1.104	1.405	1.277	1.28	1.244	1.358		1.343	1.254	1.197	1.476	1.127	1.279	0.13	0.121	0.161
									0.13	0.95	0.597	1.406	1.29	1.29	1.251	1.359	1.332	1.183	1.267	1.158	1.475	1.125	1.278	0.13	0.121	0.161				1.248	1.328	1.102	1.4	1.277	1.277	1.246	1.356		1.344	1.252	1.197	1.475	1.125	1.278	0.13	0.121	0.161
									0.13	0.947	0.586	1.408	1.291	1.291	1.251	1.357	1.332	1.181	1.265	1.158	1.474	1.125	1.275	0.13	0.121	0.161				1.237	1.325	1.099	1.395	1.279	1.275	1.248	1.358		1.345	1.251	1.194	1.474	1.125	1.275	0.13	0.121	0.161
									0.129	0.94	0.575	1.413	1.29	1.29	1.251	1.357	1.333	1.185	1.263	1.156	1.474	1.125	1.274	0.13	0.121	0.161				1.228	1.325	1.094	1.391	1.278	1.274	1.248	1.357		1.346	1.251	1.194	1.474	1.125	1.274	0.13	0.121	0.161
									0.129	0.932	0.565	1.418	1.289	1.289	1.251	1.358	1.332	1.186	1.265	1.154	1.474	1.124	1.274	0.13	0.121	0.161				1.221	1.324	1.093	1.387	1.28	1.27	1.247	1.36		1.346	1.252	1.194	1.474	1.124	1.274	0.13	0.121	0.161
									0.128	0.918	0.556	1.42	1.287	1.287	1.249	1.358	1.336	1.185	1.266	1.153	1.475	1.122	1.27	0.13	0.121	0.161				1.21	1.323	1.091	1.382	1.278	1.267	1.25	1.361		1.348	1.252	1.192	1.475	1.122	1.27	0.13	0.121	0.161
									0.128	0.906	0.546	1.422	1.285	1.285	1.249	1.361	1.335	1.188	1.267	1.153	1.476	1.121	1.267	0.13	0.121	0.161				1.203	1.322	1.085	1.379	1.277	1.268	1.25	1.364		1.349	1.254	1.19	1.476	1.121	1.267	0.13	0.121	0.161
									0.128	0.887	0.536	1.427	1.286	1.286	1.25	1.364	1.33	1.187	1.267	1.151	1.476	1.121	1.269	0.13	0.121	0.161				1.194	1.32	1.082	1.372	1.278	1.269	1.249	1.366		1.353	1.255	1.188	1.476	1.121	1.269	0.13	0.121	0.161
									0.127	0.865	0.526	1.429	1.287	1.287	1.25	1.365	1.332	1.186	1.269	1.15	1.474	1.119	1.268	0.13	0.121	0.161				1.184	1.317	1.079	1.369	1.278	1.27	1.25	1.361		1.354	1.257	1.188	1.474	1.119	1.268	0.13	0.121	0.161
									0.127	0.845	0.513	1.433	1.287	1.287	1.25	1.369	1.33	1.189	1.27	1.147	1.475	1.118	1.264	0.13	0.121	0.161				1.175	1.316	1.078	1.365	1.277	1.269	1.25	1.362		1.354	1.258	1.187	1.475	1.118	1.264	0.13	0.121	0.161
									0.127	0.821	0.502	1.439	1.286	1.286	1.254	1.369	1.333	1.193	1.272	1.143	1.476	1.118	1.262	0.13	0.121	0.161				1.164	1.315	1.076	1.359	1.277	1.269	1.251	1.358		1.353	1.259	1.186	1.476	1.118	1.262	0.13	0.121	0.161
									0.126	0.798	0.492	1.443	1.288	1.288	1.254	1.367	1.332	1.194	1.273	1.141	1.477	1.116	1.26	0.13	0.121	0.161				1.156	1.316	1.074	1.354	1.275	1.27	1.251	1.358		1.353	1.261	1.185	1.477	1.116	1.26	0.13	0.121	0.161
									0.126	0.773	0.483	1.449	1.286	1.286	1.255	1.366	1.33	1.195	1.272	1.14	1.478	1.115	1.26	0.13	0.121	0.161				1.145	1.314	1.073	1.347	1.275	1.269	1.252	1.359		1.353	1.261	1.182	1.478	1.115	1.26	0.13	0.121	0.161
									0.126	0.75	0.472	1.454	1.287	1.287	1.255	1.362	1.33	1.194	1.273	1.141	1.478	1.112	1.26	0.13	0.121	0.161				1.136	1.311	1.072	1.341	1.272	1.266	1.254	1.358		1.355	1.26	1.18	1.478	1.112	1.26	0.13	0.121	0.161
									0.126	0.717	0.461	1.456	1.289	1.289	1.255	1.359	1.331	1.199	1.275	1.14	1.478	1.11	1.259	0.13	0.121	0.161				1.127	1.31	1.072	1.334	1.271	1.266	1.255	1.358		1.356	1.26	1.176	1.478	1.11	1.259	0.13	0.121	0.161
									0.126	0.689	0.452	1.459	1.291	1.291	1.253	1.356	1.328	1.203	1.277	1.139	1.477	1.109	1.256	0.13	0.121	0.161				1.121	1.307	1.074	1.33	1.27	1.264	1.256	1.36		1.357	1.261	1.173	1.477	1.109	1.256	0.13	0.121	0.161
									0.126	0.661	0.443	1.46	1.29	1.29	1.252	1.358	1.327	1.204	1.278	1.138	1.476	1.107	1.254	0.13	0.121	0.161				1.114	1.304	1.074	1.325	1.268	1.262	1.253	1.358		1.359	1.261	1.173	1.476	1.107	1.254	0.13	0.121	0.161
									0.126	0.635	0.434	1.462	1.288	1.288	1.251	1.357	1.325	1.207	1.278	1.134	1.474	1.105	1.252	0.13	0.121	0.161				1.108	1.302	1.072	1.316	1.266	1.262	1.254	1.359		1.357	1.262	1.172	1.474	1.105	1.252	0.13	0.121	0.161
								29	0.125	0.607	0.423	1.464	1.285	1.285	1.25	1.355	1.325	1.208	1.278	1.135	1.475	1.104	1.25	0.13	0.121	0.161			29	1.104	1.3	1.07	1.308	1.267	1.26	1.255	1.358		1.36	1.263	1.17	1.475	1.104	1.25	0.13	0.121	0.161
									0.125	0.585	0.415	1.465	1.284	1.284	1.247	1.353	1.328	1.208	1.279	1.134	1.477	1.104	1.246	0.13	0.121	0.161				1.099	1.299	1.066	1.301	1.267	1.255	1.256	1.357		1.362	1.261	1.169	1.477	1.104	1.246	0.13	0.121	0.161
									0.125	0.562	0.406	1.466	1.283	1.283	1.25	1.352	1.328	1.21	1.277	1.134	1.478	1.102	1.243	0.13	0.121	0.161				1.095	1.295	1.066	1.297	1.267	1.252	1.257	1.355		1.364	1.26	1.169	1.478	1.102	1.243	0.13	0.121	0.161
									0.124	0.539	0.398	1.469	1.283	1.283	1.249	1.352	1.327	1.21	1.276	1.132	1.479	1.1	1.242	0.13	0.121	0.161				1.09	1.294	1.065	1.289	1.265	1.255	1.262	1.354		1.365	1.259	1.168	1.479	1.1	1.242	0.13	0.121	0.161
									0.124	0.517	0.39	1.47	1.28	1.28	1.25	1.351	1.327	1.212	1.275	1.131	1.48	1.1	1.244	0.13	0.121	0.161				1.084	1.29	1.064	1.284	1.268	1.252	1.264	1.353		1.367	1.259	1.168	1.48	1.1	1.244	0.13	0.121	0.161
									0.124	0.497	0.381	1.473	1.277	1.277	1.249	1.35	1.325	1.212	1.277	1.13	1.479	1.099	1.243	0.13	0.121	0.161				1.078	1.29	1.062	1.279	1.267	1.251	1.266	1.351		1.366	1.258	1.165	1.479	1.099	1.243	0.13	0.121	0.161
									0.124	0.476	0.374	1.476	1.275	1.275	1.249	1.351	1.328	1.213	1.277	1.131	1.479	1.098	1.24	0.13	0.121	0.161				1.071	1.286	1.06	1.276	1.265	1.251	1.269	1.353		1.365	1.257	1.163	1.479	1.098	1.24	0.13	0.121	0.161
									0.124	0.456	0.366	1.478	1.275	1.275	1.251	1.351	1.328	1.213	1.278	1.129	1.479	1.095	1.235	0.13	0.121	0.161				1.065	1.284	1.059	1.269	1.263	1.253	1.268	1.354		1.369	1.259	1.159	1.479	1.095	1.235	0.13	0.121	0.161
									0.124	0.436	0.359	1.479	1.276	1.276	1.254	1.352	1.327	1.208	1.278	1.126	1.48	1.094	1.231	0.13	0.121	0.161				1.061	1.282	1.061	1.261	1.262	1.249	1.272	1.354		1.371	1.26	1.156	1.48	1.094	1.231	0.13	0.121	0.161
									0.123	0.418	0.352	1.481	1.274	1.274	1.255	1.351	1.328	1.206	1.278	1.123	1.48	1.094	1.226	0.13	0.121	0.161				1.058	1.281	1.06	1.255	1.262	1.248	1.272	1.354		1.371	1.259	1.152	1.48	1.094	1.226	0.13	0.121	0.161
									0.123	0.4	0.345	1.485	1.273	1.273	1.257	1.349	1.33	1.2	1.277	1.121	1.481	1.092	1.223	0.13	0.121	0.161				1.053	1.281	1.061	1.247	1.262	1.249	1.273	1.353		1.372	1.258	1.15	1.481	1.092	1.223	0.13	0.121	0.161
									0.123	0.384	0.339	1.486	1.274	1.274	1.257	1.349	1.329	1.2	1.276	1.12	1.481	1.091	1.218	0.13	0.122	0.161				1.048	1.279	1.061	1.243	1.26	1.25	1.276	1.35		1.374	1.255	1.149	1.481	1.091	1.218	0.13	0.122	0.161
									0.123	0.368	0.332	1.487	1.274	1.274	1.26	1.349	1.329	1.199	1.275	1.118	1.48	1.089	1.217	0.13	0.122	0.161				1.045	1.28	1.062	1.237	1.26	1.249	1.278	1.348		1.375	1.257	1.145	1.48	1.089	1.217	0.13	0.122	0.161
									0.123	0.352	0.325	1.49	1.274	1.274	1.26	1.35	1.331	1.198	1.273	1.117	1.481	1.087	1.214	0.13	0.122	0.161				1.042	1.278	1.062	1.232	1.26	1.247	1.279	1.345		1.377	1.258	1.143	1.481	1.087	1.214	0.13	0.122	0.161
									0.123	0.339	0.319	1.489	1.273	1.273	1.259	1.351	1.328	1.198	1.27	1.115	1.478	1.087	1.214	0.13	0.122	0.161				1.039	1.277	1.065	1.225	1.261	1.247	1.279	1.345		1.378	1.257	1.14	1.478	1.087	1.214	0.13	0.122	0.161
									0.123	0.325	0.313	1.492	1.272	1.272	1.257	1.353	1.327	1.198	1.27	1.114	1.478	1.086	1.211	0.13	0.122	0.161				1.037	1.275	1.062	1.219	1.263	1.25	1.281	1.344		1.38	1.258	1.136	1.478	1.086	1.211	0.13	0.122	0.161
									0.123	0.311	0.306	1.494	1.272	1.272	1.258	1.351	1.325	1.198	1.27	1.114	1.477	1.084	1.205	0.13	0.122	0.161				1.033	1.274	1.062	1.214	1.265	1.247	1.281	1.344		1.383	1.258	1.133	1.477	1.084	1.205	0.13	0.122	0.161
									0.123	0.299	0.301	1.493	1.275	1.275	1.26	1.351	1.321	1.2	1.272	1.111	1.477	1.082	1.201	0.13	0.122	0.161				1.026	1.272	1.06	1.208	1.265	1.25	1.281	1.34		1.386	1.256	1.132	1.477	1.082	1.201	0.13	0.122	0.161
									0.123	0.287	0.296	1.497	1.277	1.277	1.26	1.351	1.323	1.202	1.272	1.108	1.477	1.081	1.196	0.13	0.122	0.161				1.021	1.268	1.059	1.199	1.263	1.25	1.28	1.342		1.387	1.256	1.127	1.477	1.081	1.196	0.13	0.122	0.161
									0.123	0.276	0.291	1.497	1.276	1.276	1.26	1.35	1.323	1.206	1.272	1.105	1.476	1.079	1.19	0.13	0.122	0.161				1.017	1.265	1.057	1.194	1.267	1.248	1.277	1.34		1.388	1.254	1.125	1.476	1.079	1.19	0.13	0.122	0.161
									0.123	0.268	0.286	1.499	1.277	1.277	1.26	1.353	1.324	1.207	1.272	1.106	1.474	1.077	1.184	0.13	0.122	0.161				1.013	1.261	1.058	1.186	1.266	1.252	1.276	1.339		1.386	1.25	1.123	1.474	1.077	1.184	0.13	0.122	0.161
								30	0.123	0.261	0.282	1.501	1.278	1.278	1.26	1.355	1.325	1.206	1.271	1.104	1.473	1.076	1.181	0.13	0.122	0.161			30	1.009	1.257	1.057	1.183	1.269	1.252	1.278	1.338		1.388	1.248	1.122	1.473	1.076	1.181	0.13	0.122	0.161
									0.123	0.253	0.279	1.504	1.278	1.278	1.26	1.355	1.324	1.208	1.271	1.101	1.472	1.075	1.177	0.13	0.122	0.161				1.005	1.257	1.058	1.176	1.268	1.251	1.282	1.332		1.387	1.245	1.121	1.472	1.075	1.177	0.13	0.122	0.161
									0.123	0.246	0.275	1.502	1.278	1.278	1.263	1.355	1.323	1.208	1.272	1.099	1.47	1.074	1.173	0.13	0.122	0.161				1.001	1.255	1.057	1.171	1.266	1.253	1.28	1.33		1.385	1.247	1.122	1.47	1.074	1.173	0.13	0.122	0.161
									0.123	0.239	0.271	1.503	1.277	1.277	1.265	1.355	1.322	1.208	1.271	1.099	1.468	1.073	1.169	0.13	0.122	0.161				0.997	1.254	1.057	1.165	1.266	1.256	1.279	1.33		1.385	1.247	1.122	1.468	1.073	1.169	0.13	0.122	0.161
									0.123	0.234	0.268	1.503	1.279	1.279	1.262	1.355	1.321	1.206	1.269	1.101	1.467	1.071	1.164	0.13	0.122	0.161				0.994	1.251	1.057	1.16	1.264	1.261	1.279	1.329		1.386	1.249	1.121	1.467	1.071	1.164	0.13	0.122	0.161
									0.123	0.228	0.265	1.503	1.28	1.28	1.262	1.356	1.321	1.209	1.27	1.1	1.467	1.069	1.162	0.13	0.122	0.161				0.991	1.247	1.056	1.153	1.263	1.263	1.28	1.328		1.383	1.248	1.118	1.467	1.069	1.162	0.13	0.122	0.161
									0.123	0.222	0.262	1.503	1.28	1.28	1.262	1.357	1.32	1.211	1.269	1.098	1.47	1.069	1.158	0.13	0.122	0.161				0.986	1.245	1.054	1.145	1.263	1.266	1.284	1.325		1.381	1.247	1.118	1.47	1.069	1.158	0.13	0.122	0.161
									0.123	0.217	0.257	1.504	1.277	1.277	1.261	1.358	1.319	1.21	1.267	1.097	1.469	1.069	1.155	0.13	0.122	0.161				0.982	1.243	1.055	1.139	1.267	1.264	1.285	1.326		1.381	1.245	1.117	1.469	1.069	1.155	0.13	0.122	0.161
									0.123	0.212	0.254	1.509	1.277	1.277	1.262	1.358	1.32	1.21	1.268	1.098	1.469	1.068	1.15	0.13	0.122	0.161				0.979	1.243	1.055	1.135	1.268	1.266	1.284	1.327		1.379	1.244	1.117	1.469	1.068	1.15	0.13	0.122	0.161
									0.123	0.208	0.25	1.514	1.278	1.278	1.26	1.359	1.317	1.211	1.267	1.097	1.469	1.068	1.146	0.13	0.122	0.161				0.975	1.242	1.054	1.128	1.268	1.269	1.285	1.328		1.384	1.243	1.12	1.469	1.068	1.146	0.13	0.122	0.161
									0.123	0.204	0.247	1.518	1.279	1.279	1.262	1.36	1.316	1.21	1.266	1.094	1.469	1.066	1.143	0.13	0.122	0.161				0.972	1.24	1.053	1.122	1.269	1.27	1.285	1.33		1.387	1.243	1.119	1.469	1.066	1.143	0.13	0.122	0.161
									0.123	0.2	0.244	1.522	1.278	1.278	1.265	1.362	1.317	1.206	1.266	1.094	1.466	1.065	1.136	0.13	0.122	0.161				0.967	1.238	1.051	1.12	1.267	1.269	1.287	1.329		1.389	1.245	1.118	1.466	1.065	1.136	0.13	0.122	0.161
									0.123	0.197	0.24	1.527	1.278	1.278	1.267	1.363	1.318	1.201	1.268	1.092	1.465	1.063	1.131	0.13	0.122	0.161				0.963	1.238	1.051	1.116	1.271	1.271	1.286	1.329		1.388	1.246	1.117	1.465	1.063	1.131	0.13	0.122	0.161
									0.123	0.193	0.237	1.528	1.276	1.276	1.264	1.364	1.319	1.198	1.269	1.092	1.465	1.061	1.127	0.13	0.122	0.161				0.958	1.236	1.052	1.11	1.273	1.273	1.287	1.326		1.387	1.245	1.115	1.465	1.061	1.127	0.13	0.122	0.161
									0.123	0.19	0.234	1.53	1.272	1.272	1.266	1.363	1.323	1.196	1.271	1.088	1.464	1.059	1.124	0.13	0.122	0.161				0.955	1.236	1.052	1.105	1.272	1.273	1.288	1.328		1.387	1.245	1.112	1.464	1.059	1.124	0.13	0.122	0.161
									0.123	0.187	0.231	1.535	1.272	1.272	1.267	1.362	1.323	1.19	1.272	1.087	1.464	1.057	1.117	0.13	0.122	0.161				0.952	1.238	1.055	1.1	1.273	1.273	1.29	1.331		1.386	1.245	1.11	1.464	1.057	1.117	0.13	0.122	0.161
									0.123	0.184	0.229	1.539	1.274	1.274	1.267	1.36	1.323	1.182	1.274	1.085	1.462	1.056	1.112	0.13	0.122	0.161				0.947	1.234	1.051	1.097	1.272	1.276	1.292	1.33		1.386	1.244	1.109	1.462	1.056	1.112	0.13	0.122	0.161
									0.123	0.181	0.226	1.544	1.275	1.275	1.269	1.359	1.319	1.185	1.274	1.084	1.461	1.054	1.11	0.13	0.122	0.161				0.944	1.232	1.052	1.092	1.273	1.275	1.292	1.331		1.386	1.243	1.107	1.461	1.054	1.11	0.13	0.122	0.161
									0.123	0.179	0.224	1.549	1.276	1.276	1.271	1.359	1.317	1.188	1.274	1.081	1.461	1.053	1.105	0.13	0.122	0.161				0.943	1.228	1.049	1.086	1.272	1.277	1.294	1.33		1.386	1.242	1.107	1.461	1.053	1.105	0.13	0.122	0.161
									0.123	0.176	0.221	1.551	1.278	1.278	1.275	1.358	1.317	1.189	1.272	1.085	1.459	1.051	1.101	0.13	0.122	0.161				0.939	1.226	1.048	1.083	1.273	1.276	1.294	1.328		1.385	1.243	1.105	1.459	1.051	1.101	0.13	0.122	0.161
									0.123	0.173	0.219	1.552	1.277	1.277	1.277	1.361	1.317	1.187	1.273	1.084	1.458	1.051	1.096	0.13	0.122	0.161				0.937	1.222	1.05	1.078	1.27	1.276	1.297	1.325		1.382	1.243	1.105	1.458	1.051	1.096	0.13	0.122	0.161
								31	0.123	0.171	0.217	1.555	1.277	1.277	1.278	1.361	1.316	1.181	1.273	1.083	1.457	1.049	1.09	0.13	0.122	0.161			31	0.934	1.22	1.049	1.074	1.27	1.275	1.297	1.324		1.38	1.242	1.103	1.457	1.049	1.09	0.13	0.122	0.161
									0.123	0.168	0.215	1.557	1.277	1.277	1.28	1.361	1.32	1.177	1.272	1.082	1.456	1.048	1.086	0.13	0.122	0.161				0.931	1.218	1.048	1.069	1.271	1.273	1.298	1.323		1.381	1.241	1.1	1.456	1.048	1.086	0.13	0.122	0.161
									0.123	0.166	0.213	1.56	1.278	1.278	1.279	1.361	1.321	1.174	1.271	1.081	1.453	1.046	1.082	0.13	0.122	0.161				0.929	1.217	1.051	1.063	1.271	1.273	1.3	1.318		1.383	1.241	1.096	1.453	1.046	1.082	0.13	0.122	0.161
									0.123	0.164	0.212	1.561	1.278	1.278	1.275	1.359	1.321	1.175	1.272	1.082	1.451	1.046	1.078	0.13	0.122	0.161				0.925	1.215	1.051	1.058	1.27	1.275	1.303	1.317		1.383	1.24	1.093	1.451	1.046	1.078	0.13	0.122	0.161
									0.123	0.162	0.21	1.563	1.281	1.281	1.273	1.358	1.32	1.176	1.271	1.081	1.45	1.045	1.072	0.13	0.122	0.161				0.921	1.214	1.052	1.053	1.27	1.273	1.305	1.314		1.383	1.237	1.092	1.45	1.045	1.072	0.13	0.122	0.161
									0.123	0.161	0.208	1.566	1.282	1.282	1.274	1.358	1.315	1.175	1.269	1.08	1.45	1.043	1.066	0.13	0.122	0.161				0.918	1.213	1.052	1.049	1.27	1.273	1.31	1.311		1.387	1.235	1.088	1.45	1.043	1.066	0.13	0.122	0.161
									0.123	0.159	0.206	1.567	1.281	1.281	1.275	1.357	1.314	1.171	1.268	1.081	1.451	1.042	1.063	0.13	0.122	0.161				0.917	1.211	1.054	1.046	1.271	1.276	1.31	1.31		1.391	1.233	1.089	1.451	1.042	1.063	0.13	0.122	0.161
									0.123	0.158	0.205	1.568	1.28	1.28	1.279	1.357	1.313	1.168	1.268	1.081	1.45	1.042	1.058	0.131	0.122	0.161				0.915	1.212	1.054	1.042	1.272	1.277	1.31	1.313		1.392	1.231	1.089	1.45	1.042	1.058	0.131	0.122	0.161
									0.123	0.156	0.203	1.567	1.281	1.281	1.28	1.357	1.311	1.164	1.266	1.078	1.45	1.041	1.053	0.131	0.122	0.161				0.911	1.213	1.055	1.037	1.276	1.277	1.311	1.313		1.394	1.231	1.088	1.45	1.041	1.053	0.131	0.122	0.161
									0.123	0.155	0.201	1.57	1.281	1.281	1.278	1.357	1.311	1.163	1.263	1.078	1.448	1.041	1.05	0.131	0.122	0.161				0.907	1.211	1.054	1.033	1.275	1.279	1.311	1.315		1.397	1.23	1.087	1.448	1.041	1.05	0.131	0.122	0.161
									0.123	0.153	0.2	1.572	1.282	1.282	1.279	1.358	1.312	1.161	1.264	1.078	1.448	1.039	1.048	0.131	0.122	0.161				0.904	1.209	1.055	1.029	1.276	1.283	1.313	1.315		1.395	1.229	1.087	1.448	1.039	1.048	0.131	0.122	0.161
									0.123	0.152	0.198	1.576	1.282	1.282	1.281	1.359	1.315	1.16	1.264	1.077	1.447	1.037	1.044	0.131	0.122	0.161				0.901	1.21	1.054	1.021	1.277	1.283	1.315	1.314		1.395	1.227	1.086	1.447	1.037	1.044	0.131	0.122	0.161
									0.123	0.151	0.197	1.58	1.282	1.282	1.283	1.359	1.314	1.156	1.263	1.077	1.443	1.036	1.039	0.131	0.122	0.161				0.899	1.209	1.056	1.016	1.274	1.282	1.316	1.313		1.396	1.225	1.085	1.443	1.036	1.039	0.131	0.122	0.161
									0.123	0.149	0.195	1.58	1.282	1.282	1.283	1.359	1.315	1.154	1.263	1.078	1.44	1.036	1.034	0.131	0.122	0.161				0.896	1.209	1.058	1.009	1.274	1.283	1.318	1.312		1.395	1.223	1.084	1.44	1.036	1.034	0.131	0.122	0.161
									0.123	0.149	0.194	1.579	1.281	1.281	1.282	1.359	1.317	1.154	1.263	1.079	1.438	1.036	1.03	0.131	0.122	0.161				0.893	1.206	1.057	1.002	1.274	1.285	1.317	1.314		1.395	1.221	1.085	1.438	1.036	1.03	0.131	0.122	0.161
									0.123	0.148	0.193	1.576	1.278	1.278	1.278	1.358	1.32	1.152	1.262	1.079	1.436	1.034	1.024	0.131	0.122	0.161				0.89	1.204	1.059	0.995	1.27	1.286	1.318	1.316		1.389	1.218	1.085	1.436	1.034	1.024	0.131	0.122	0.161
									0.123	0.147	0.192	1.575	1.279	1.279	1.275	1.36	1.321	1.15	1.259	1.079	1.436	1.032	1.021	0.131	0.122	0.161				0.887	1.203	1.057	0.989	1.271	1.291	1.321	1.319		1.389	1.217	1.084	1.436	1.032	1.021	0.131	0.122	0.161
									0.123	0.146	0.19	1.575	1.278	1.278	1.273	1.36	1.324	1.148	1.257	1.078	1.434	1.03	1.018	0.131	0.122	0.161				0.885	1.202	1.058	0.986	1.272	1.292	1.32	1.318		1.389	1.215	1.083	1.434	1.03	1.018	0.131	0.122	0.161
									0.123	0.145	0.189	1.575	1.279	1.279	1.27	1.358	1.326	1.145	1.258	1.075	1.43	1.029	1.014	0.131	0.122	0.161				0.882	1.202	1.058	0.983	1.274	1.295	1.32	1.315		1.388	1.213	1.081	1.43	1.029	1.014	0.131	0.122	0.161
									0.123	0.144	0.188	1.578	1.28	1.28	1.267	1.358	1.326	1.143	1.256	1.074	1.429	1.027	1.011	0.131	0.122	0.161				0.879	1.201	1.056	0.978	1.272	1.297	1.319	1.316		1.385	1.212	1.079	1.429	1.027	1.011	0.131	0.122	0.161
									0.123	0.143	0.187	1.575	1.28	1.28	1.268	1.359	1.324	1.14	1.257	1.074	1.426	1.026	1.007	0.131	0.122	0.161				0.875	1.198	1.057	0.971	1.274	1.299	1.321	1.316		1.386	1.209	1.079	1.426	1.026	1.007	0.131	0.122	0.161
								32	0.123	0.142	0.186	1.574	1.28	1.28	1.268	1.36	1.329	1.135	1.258	1.074	1.426	1.025	1.004	0.131	0.122	0.161			32	0.873	1.196	1.06	0.966	1.273	1.305	1.323	1.316		1.385	1.209	1.081	1.426	1.025	1.004	0.131	0.122	0.161
									0.123	0.141	0.185	1.573	1.279	1.279	1.261	1.362	1.333	1.133	1.259	1.073	1.424	1.025	1.003	0.131	0.122	0.161				0.87	1.197	1.062	0.965	1.275	1.307	1.323	1.318		1.379	1.207	1.08	1.424	1.025	1.003	0.131	0.122	0.161
									0.123	0.141	0.185	1.57	1.281	1.281	1.262	1.363	1.334	1.132	1.259	1.072	1.42	1.024	1	0.131	0.122	0.161				0.867	1.195	1.063	0.962	1.275	1.308	1.323	1.317		1.377	1.205	1.079	1.42	1.024	1	0.131	0.122	0.161
									0.123	0.14	0.184	1.568	1.28	1.28	1.258	1.362	1.335	1.131	1.257	1.07	1.418	1.023	0.997	0.131	0.122	0.161				0.865	1.194	1.059	0.957	1.276	1.309	1.322	1.319		1.379	1.204	1.077	1.418	1.023	0.997	0.131	0.122	0.161
									0.123	0.139	0.183	1.568	1.278	1.278	1.254	1.362	1.333	1.129	1.256	1.071	1.417	1.023	0.994	0.131	0.122	0.161				0.862	1.194	1.059	0.954	1.278	1.303	1.322	1.32		1.376	1.202	1.075	1.417	1.023	0.994	0.131	0.122	0.161
									0.123	0.139	0.182	1.569	1.279	1.279	1.25	1.364	1.331	1.126	1.256	1.069	1.414	1.022	0.992	0.131	0.122	0.161				0.86	1.193	1.059	0.95	1.28	1.3	1.323	1.319		1.378	1.2	1.075	1.414	1.022	0.992	0.131	0.122	0.161
									0.123	0.138	0.181	1.568	1.28	1.28	1.247	1.364	1.328	1.118	1.257	1.067	1.411	1.022	0.989	0.131	0.122	0.161				0.858	1.192	1.06	0.943	1.284	1.3	1.322	1.32		1.38	1.198	1.074	1.411	1.022	0.989	0.131	0.122	0.161
									0.124	0.138	0.181	1.563	1.276	1.276	1.244	1.363	1.327	1.119	1.255	1.066	1.409	1.021	0.989	0.131	0.122	0.161				0.856	1.192	1.061	0.941	1.285	1.3	1.32	1.319		1.382	1.195	1.072	1.409	1.021	0.989	0.131	0.122	0.161
									0.124	0.137	0.18	1.562	1.277	1.277	1.242	1.362	1.327	1.119	1.253	1.063	1.409	1.02	0.987	0.131	0.122	0.161				0.851	1.193	1.061	0.938	1.286	1.299	1.319	1.322		1.383	1.194	1.071	1.409	1.02	0.987	0.131	0.122	0.161
									0.124	0.136	0.179	1.561	1.277	1.277	1.24	1.361	1.328	1.12	1.252	1.063	1.409	1.019	0.987	0.131	0.122	0.161				0.848	1.194	1.061	0.935	1.287	1.3	1.319	1.319		1.384	1.195	1.07	1.409	1.019	0.987	0.131	0.122	0.161
									0.124	0.136	0.178	1.56	1.277	1.277	1.238	1.361	1.328	1.12	1.253	1.063	1.408	1.017	0.986	0.131	0.122	0.161				0.845	1.192	1.063	0.93	1.287	1.302	1.32	1.321		1.381	1.193	1.069	1.408	1.017	0.986	0.131	0.122	0.161
									0.124	0.135	0.178	1.564	1.276	1.276	1.232	1.357	1.33	1.12	1.25	1.063	1.406	1.016	0.987	0.131	0.122	0.161				0.842	1.192	1.064	0.926	1.287	1.3	1.321	1.322		1.381	1.191	1.067	1.406	1.016	0.987	0.131	0.122	0.161
									0.124	0.135	0.177	1.567	1.274	1.274	1.227	1.361	1.329	1.119	1.249	1.061	1.405	1.016	0.987	0.131	0.122	0.161				0.838	1.191	1.063	0.924	1.286	1.302	1.32	1.323		1.38	1.192	1.065	1.405	1.016	0.987	0.131	0.122	0.161
									0.124	0.134	0.176	1.57	1.275	1.275	1.227	1.361	1.329	1.114	1.248	1.062	1.402	1.015	0.985	0.131	0.122	0.161				0.834	1.192	1.065	0.923	1.287	1.302	1.32	1.321		1.382	1.192	1.065	1.402	1.015	0.985	0.131	0.122	0.161
									0.124	0.134	0.176	1.57	1.274	1.274	1.223	1.36	1.326	1.11	1.248	1.06	1.399	1.015	0.984	0.131	0.122	0.161				0.83	1.189	1.066	0.921	1.286	1.305	1.318	1.319		1.383	1.191	1.065	1.399	1.015	0.984	0.131	0.122	0.161
									0.124	0.133	0.175	1.571	1.274	1.274	1.22	1.359	1.327	1.104	1.246	1.058	1.397	1.015	0.979	0.131	0.122	0.162				0.825	1.186	1.07	0.916	1.287	1.308	1.318	1.318		1.384	1.19	1.062	1.397	1.015	0.979	0.131	0.122	0.162
									0.124	0.133	0.174	1.574	1.273	1.273	1.21	1.359	1.325	1.101	1.248	1.059	1.394	1.015	0.976	0.131	0.122	0.162				0.821	1.185	1.07	0.915	1.291	1.312	1.319	1.319		1.384	1.19	1.061	1.394	1.015	0.976	0.131	0.122	0.162
									0.124	0.133	0.174	1.575	1.271	1.271	1.206	1.358	1.322	1.101	1.25	1.057	1.392	1.014	0.975	0.131	0.122	0.162				0.816	1.183	1.07	0.911	1.293	1.311	1.32	1.32		1.384	1.187	1.061	1.392	1.014	0.975	0.131	0.122	0.162
									0.124	0.132	0.173	1.577	1.27	1.27	1.201	1.356	1.32	1.099	1.251	1.057	1.391	1.013	0.973	0.131	0.122	0.162				0.812	1.181	1.068	0.907	1.292	1.312	1.321	1.319		1.384	1.185	1.064	1.391	1.013	0.973	0.131	0.122	0.162
									0.124	0.132	0.172	1.581	1.271	1.271	1.197	1.356	1.318	1.099	1.252	1.056	1.388	1.013	0.972	0.131	0.122	0.162				0.808	1.178	1.071	0.904	1.292	1.312	1.322	1.318		1.383	1.184	1.064	1.388	1.013	0.972	0.131	0.122	0.162
									0.124	0.132	0.172	1.584	1.27	1.27	1.197	1.353	1.32	1.099	1.252	1.053	1.384	1.012	0.969	0.131	0.122	0.162				0.803	1.177	1.071	0.9	1.291	1.31	1.323	1.318		1.384	1.184	1.064	1.384	1.012	0.969	0.131	0.122	0.162
								33	0.124	0.131	0.171	1.583	1.269	1.269	1.195	1.354	1.319	1.098	1.254	1.053	1.381	1.012	0.967	0.131	0.122	0.162			33	0.799	1.176	1.072	0.895	1.288	1.308	1.324	1.318		1.383	1.182	1.065	1.381	1.012	0.967	0.131	0.122	0.162
									0.124	0.131	0.17	1.583	1.267	1.267	1.191	1.354	1.318	1.098	1.255	1.052	1.379	1.011	0.966	0.131	0.123	0.162				0.794	1.17	1.072	0.891	1.286	1.307	1.326	1.317		1.381	1.178	1.064	1.379	1.011	0.966	0.131	0.123	0.162
									0.124	0.131	0.17	1.585	1.263	1.263	1.187	1.353	1.318	1.095	1.259	1.051	1.377	1.01	0.963	0.131	0.123	0.162				0.79	1.169	1.072	0.89	1.284	1.306	1.328	1.315		1.382	1.176	1.064	1.377	1.01	0.963	0.131	0.123	0.162
									0.124	0.131	0.17	1.577	1.259	1.259	1.186	1.351	1.319	1.092	1.26	1.049	1.377	1.01	0.963	0.131	0.123	0.162				0.784	1.17	1.074	0.886	1.284	1.304	1.33	1.316		1.38	1.173	1.063	1.377	1.01	0.963	0.131	0.123	0.162
									0.124	0.13	0.169	1.572	1.258	1.258	1.183	1.348	1.32	1.092	1.261	1.048	1.374	1.009	0.961	0.131	0.123	0.162				0.779	1.168	1.075	0.883	1.285	1.301	1.331	1.315		1.378	1.17	1.061	1.374	1.009	0.961	0.131	0.123	0.162
									0.124	0.13	0.169	1.571	1.255	1.255	1.182	1.346	1.319	1.089	1.259	1.047	1.369	1.009	0.959	0.131	0.123	0.162				0.775	1.165	1.076	0.878	1.284	1.3	1.333	1.315		1.378	1.168	1.059	1.369	1.009	0.959	0.131	0.123	0.162
									0.124	0.13	0.168	1.569	1.254	1.254	1.176	1.345	1.317	1.086	1.26	1.045	1.365	1.008	0.959	0.131	0.123	0.162				0.772	1.159	1.075	0.873	1.285	1.298	1.331	1.312		1.378	1.168	1.057	1.365	1.008	0.959	0.131	0.123	0.162
									0.124	0.129	0.168	1.57	1.254	1.254	1.17	1.344	1.319	1.087	1.26	1.043	1.362	1.008	0.959	0.131	0.123	0.162				0.77	1.159	1.079	0.871	1.284	1.292	1.332	1.311		1.379	1.167	1.057	1.362	1.008	0.959	0.131	0.123	0.162
									0.124	0.129	0.167	1.567	1.255	1.255	1.164	1.343	1.316	1.085	1.261	1.04	1.358	1.007	0.958	0.131	0.123	0.162				0.768	1.16	1.078	0.867	1.283	1.288	1.333	1.311		1.38	1.164	1.055	1.358	1.007	0.958	0.131	0.123	0.162
									0.124	0.129	0.167	1.565	1.253	1.253	1.161	1.344	1.315	1.083	1.261	1.039	1.356	1.006	0.957	0.131	0.123	0.162				0.766	1.158	1.08	0.863	1.281	1.284	1.332	1.308		1.383	1.162	1.054	1.356	1.006	0.957	0.131	0.123	0.162
									0.124	0.128	0.166	1.566	1.252	1.252	1.158	1.345	1.314	1.079	1.26	1.038	1.354	1.005	0.956	0.131	0.123	0.162				0.764	1.158	1.081	0.861	1.279	1.28	1.332	1.307		1.38	1.161	1.053	1.354	1.005	0.956	0.131	0.123	0.162
									0.124	0.128	0.166	1.567	1.253	1.253	1.157	1.345	1.313	1.074	1.26	1.036	1.352	1.004	0.955	0.131	0.123	0.162				0.764	1.154	1.08	0.86	1.279	1.274	1.334	1.306		1.377	1.158	1.053	1.352	1.004	0.955	0.131	0.123	0.162
									0.124	0.128	0.166	1.571	1.255	1.255	1.154	1.347	1.313	1.072	1.258	1.034	1.352	1.003	0.955	0.131	0.123	0.162				0.763	1.151	1.079	0.855	1.278	1.264	1.335	1.305		1.378	1.157	1.053	1.352	1.003	0.955	0.131	0.123	0.162
									0.124	0.128	0.165	1.57	1.255	1.255	1.153	1.347	1.313	1.072	1.259	1.033	1.351	1.002	0.954	0.131	0.123	0.162				0.761	1.147	1.079	0.851	1.28	1.26	1.333	1.304		1.376	1.155	1.053	1.351	1.002	0.954	0.131	0.123	0.162
									0.124	0.128	0.165	1.566	1.254	1.254	1.152	1.348	1.309	1.067	1.258	1.034	1.349	1.002	0.952	0.131	0.123	0.162				0.759	1.144	1.079	0.845	1.282	1.255	1.332	1.301		1.375	1.154	1.053	1.349	1.002	0.952	0.131	0.123	0.162
									0.124	0.127	0.164	1.567	1.255	1.255	1.151	1.35	1.312	1.063	1.257	1.033	1.347	1.001	0.952	0.131	0.123	0.162				0.759	1.145	1.078	0.842	1.281	1.249	1.329	1.299		1.378	1.152	1.053	1.347	1.001	0.952	0.131	0.123	0.162
									0.124	0.127	0.164	1.571	1.254	1.254	1.147	1.349	1.316	1.061	1.255	1.032	1.346	1	0.953	0.131	0.123	0.162				0.758	1.144	1.079	0.838	1.281	1.245	1.328	1.298		1.381	1.151	1.051	1.346	1	0.953	0.131	0.123	0.162
									0.124	0.127	0.164	1.569	1.257	1.257	1.144	1.35	1.316	1.059	1.254	1.033	1.343	0.999	0.951	0.131	0.123	0.162				0.756	1.142	1.078	0.837	1.281	1.24	1.326	1.299		1.38	1.149	1.051	1.343	0.999	0.951	0.131	0.123	0.162
									0.124	0.127	0.164	1.568	1.254	1.254	1.14	1.353	1.317	1.056	1.257	1.033	1.342	1	0.951	0.131	0.123	0.162				0.754	1.143	1.078	0.834	1.284	1.232	1.327	1.298		1.383	1.148	1.05	1.342	1	0.951	0.131	0.123	0.162
									0.124	0.126	0.164	1.568	1.256	1.256	1.134	1.354	1.315	1.05	1.259	1.032	1.342	1	0.95	0.131	0.123	0.162				0.754	1.141	1.078	0.829	1.282	1.225	1.33	1.298		1.384	1.145	1.048	1.342	1	0.95	0.131	0.123	0.162
									0.124	0.126	0.164	1.565	1.254	1.254	1.126	1.357	1.313	1.047	1.26	1.032	1.341	1	0.948	0.131	0.123	0.162				0.753	1.14	1.079	0.825	1.281	1.216	1.33	1.297		1.381	1.142	1.046	1.341	1	0.948	0.131	0.123	0.162
								34	0.124	0.126	0.163	1.562	1.254	1.254	1.121	1.357	1.312	1.046	1.264	1.032	1.34	1	0.947	0.131	0.123	0.162			34	0.751	1.138	1.081	0.822	1.282	1.208	1.331	1.294		1.379	1.141	1.045	1.34	1	0.947	0.131	0.123	0.162
									0.124	0.125	0.162	1.559	1.257	1.257	1.119	1.36	1.311	1.043	1.264	1.03	1.338	1	0.946	0.131	0.123	0.162				0.751	1.138	1.082	0.819	1.282	1.203	1.331	1.295		1.379	1.137	1.044	1.338	1	0.946	0.131	0.123	0.162
									0.124	0.125	0.162	1.555	1.259	1.259	1.114	1.357	1.315	1.039	1.261	1.029	1.339	1	0.944	0.132	0.123	0.162				0.752	1.137	1.081	0.812	1.279	1.194	1.334	1.295		1.38	1.134	1.044	1.339	1	0.944	0.132	0.123	0.162
									0.124	0.125	0.162	1.555	1.26	1.26	1.108	1.358	1.313	1.037	1.261	1.029	1.337	0.999	0.943	0.132	0.123	0.162				0.751	1.135	1.08	0.806	1.28	1.185	1.336	1.292		1.383	1.132	1.042	1.337	0.999	0.943	0.132	0.123	0.162
									0.124	0.125	0.161	1.553	1.259	1.259	1.105	1.356	1.314	1.032	1.258	1.029	1.335	0.999	0.943	0.132	0.123	0.162				0.752	1.135	1.075	0.804	1.279	1.179	1.336	1.29		1.383	1.13	1.041	1.335	0.999	0.943	0.132	0.123	0.162
									0.124	0.125	0.161	1.55	1.259	1.259	1.102	1.357	1.316	1.026	1.259	1.027	1.334	0.998	0.941	0.132	0.123	0.162				0.752	1.133	1.069	0.798	1.278	1.174	1.338	1.288		1.382	1.128	1.039	1.334	0.998	0.941	0.132	0.123	0.162
									0.124	0.125	0.161	1.55	1.26	1.26	1.095	1.356	1.315	1.023	1.258	1.027	1.332	0.997	0.941	0.132	0.123	0.162				0.751	1.132	1.069	0.795	1.277	1.166	1.338	1.288		1.381	1.127	1.039	1.332	0.997	0.941	0.132	0.123	0.162
									0.124	0.125	0.161	1.551	1.262	1.262	1.086	1.358	1.315	1.02	1.261	1.026	1.33	0.996	0.942	0.132	0.123	0.162				0.75	1.132	1.064	0.792	1.275	1.158	1.337	1.288		1.382	1.126	1.038	1.33	0.996	0.942	0.132	0.123	0.162
									0.124	0.125	0.161	1.551	1.26	1.26	1.083	1.357	1.313	1.018	1.261	1.024	1.327	0.995	0.94	0.132	0.123	0.162				0.75	1.131	1.06	0.791	1.273	1.152	1.337	1.289		1.383	1.125	1.037	1.327	0.995	0.94	0.132	0.123	0.162
									0.124	0.125	0.161	1.551	1.263	1.263	1.074	1.356	1.316	1.014	1.261	1.023	1.325	0.994	0.939	0.132	0.123	0.162				0.751	1.129	1.057	0.788	1.273	1.145	1.334	1.29		1.382	1.123	1.037	1.325	0.994	0.939	0.132	0.123	0.162
									0.124	0.124	0.161	1.549	1.262	1.262	1.071	1.356	1.312	1.011	1.259	1.022	1.322	0.994	0.937	0.132	0.123	0.162				0.753	1.129	1.053	0.787	1.274	1.14	1.332	1.291		1.383	1.121	1.037	1.322	0.994	0.937	0.132	0.123	0.162
									0.124	0.124	0.161	1.548	1.26	1.26	1.062	1.357	1.315	1.008	1.257	1.02	1.32	0.993	0.938	0.132	0.123	0.162				0.751	1.128	1.049	0.788	1.276	1.133	1.33	1.292		1.38	1.12	1.037	1.32	0.993	0.938	0.132	0.123	0.162
									0.124	0.124	0.161	1.546	1.262	1.262	1.056	1.357	1.312	1.004	1.257	1.021	1.319	0.993	0.936	0.132	0.123	0.162				0.751	1.127	1.043	0.787	1.277	1.125	1.328	1.293		1.378	1.117	1.038	1.319	0.993	0.936	0.132	0.123	0.162
									0.124	0.124	0.16	1.542	1.261	1.261	1.045	1.356	1.31	1.003	1.256	1.023	1.314	0.994	0.936	0.132	0.123	0.162				0.752	1.128	1.041	0.785	1.276	1.118	1.325	1.293		1.375	1.116	1.039	1.314	0.994	0.936	0.132	0.123	0.162
									0.124	0.124	0.16	1.54	1.257	1.257	1.038	1.355	1.31	0.997	1.255	1.023	1.311	0.994	0.934	0.132	0.123	0.162				0.754	1.126	1.035	0.784	1.275	1.11	1.323	1.29		1.373	1.114	1.041	1.311	0.994	0.934	0.132	0.123	0.162
									0.124	0.124	0.16	1.542	1.257	1.257	1.03	1.356	1.311	0.994	1.252	1.021	1.307	0.994	0.933	0.132	0.123	0.162				0.754	1.126	1.029	0.783	1.273	1.104	1.32	1.288		1.369	1.113	1.04	1.307	0.994	0.933	0.132	0.123	0.162
									0.124	0.123	0.16	1.545	1.254	1.254	1.027	1.356	1.307	0.992	1.252	1.02	1.305	0.992	0.931	0.132	0.123	0.162				0.755	1.126	1.021	0.782	1.269	1.098	1.317	1.288		1.368	1.112	1.039	1.305	0.992	0.931	0.132	0.123	0.162
									0.124	0.123	0.16	1.547	1.256	1.256	1.019	1.359	1.308	0.988	1.25	1.021	1.305	0.992	0.929	0.132	0.123	0.162				0.757	1.124	1.01	0.78	1.268	1.092	1.316	1.284		1.365	1.11	1.039	1.305	0.992	0.929	0.132	0.123	0.162
									0.124	0.123	0.16	1.54	1.257	1.257	1.011	1.358	1.308	0.984	1.251	1.022	1.304	0.993	0.929	0.132	0.123	0.162				0.757	1.124	0.997	0.776	1.267	1.085	1.318	1.286		1.363	1.107	1.039	1.304	0.993	0.929	0.132	0.123	0.162
									0.124	0.123	0.16	1.538	1.26	1.26	1.004	1.355	1.306	0.981	1.248	1.023	1.302	0.992	0.928	0.132	0.123	0.162				0.756	1.123	0.984	0.772	1.266	1.079	1.315	1.287		1.361	1.104	1.039	1.302	0.992	0.928	0.132	0.123	0.162
									0.124	0.123	0.16	1.533	1.26	1.26	1.001	1.353	1.306	0.978	1.249	1.024	1.301	0.992	0.926	0.132	0.123	0.162				0.757	1.124	0.978	0.77	1.265	1.075	1.319	1.288		1.359	1.101	1.04	1.301	0.992	0.926	0.132	0.123	0.162
								35	0.124	0.123	0.159	1.525	1.261	1.261	0.999	1.355	1.303	0.973	1.248	1.022	1.301	0.992	0.926	0.132	0.123	0.162			35	0.758	1.124	0.972	0.771	1.264	1.071	1.322	1.287		1.359	1.099	1.041	1.301	0.992	0.926	0.132	0.123	0.162
									0.124	0.123	0.159	1.518	1.258	1.258	1	1.355	1.298	0.969	1.245	1.022	1.301	0.992	0.926	0.132	0.123	0.162				0.758	1.124	0.964	0.766	1.264	1.065	1.325	1.29		1.359	1.097	1.041	1.301	0.992	0.926	0.132	0.123	0.162
									0.124	0.123	0.159	1.517	1.257	1.257	0.998	1.358	1.295	0.965	1.247	1.022	1.299	0.99	0.926	0.132	0.123	0.162				0.759	1.122	0.957	0.762	1.262	1.061	1.328	1.289		1.357	1.096	1.041	1.299	0.99	0.926	0.132	0.123	0.162
									0.124	0.123	0.159	1.514	1.259	1.259	0.998	1.361	1.294	0.962	1.248	1.021	1.296	0.99	0.926	0.132	0.123	0.162				0.761	1.123	0.95	0.759	1.261	1.057	1.327	1.291		1.355	1.095	1.042	1.296	0.99	0.926	0.132	0.123	0.162
									0.124	0.123	0.159	1.514	1.257	1.257	0.995	1.363	1.296	0.956	1.248	1.02	1.294	0.989	0.924	0.132	0.123	0.162				0.76	1.121	0.941	0.756	1.26	1.05	1.33	1.29		1.358	1.093	1.042	1.294	0.989	0.924	0.132	0.123	0.162
									0.124	0.123	0.159	1.515	1.256	1.256	0.993	1.362	1.294	0.949	1.249	1.02	1.294	0.99	0.923	0.132	0.123	0.162				0.762	1.119	0.931	0.752	1.26	1.046	1.329	1.292		1.358	1.093	1.043	1.294	0.99	0.923	0.132	0.123	0.162
									0.124	0.123	0.159	1.51	1.254	1.254	0.984	1.363	1.293	0.943	1.249	1.018	1.292	0.99	0.923	0.132	0.123	0.162				0.761	1.117	0.925	0.751	1.261	1.04	1.326	1.292		1.358	1.089	1.042	1.292	0.99	0.923	0.132	0.123	0.162
									0.125	0.123	0.159	1.504	1.253	1.253	0.976	1.365	1.293	0.939	1.251	1.015	1.291	0.989	0.921	0.132	0.123	0.162				0.761	1.114	0.914	0.75	1.262	1.035	1.323	1.291		1.358	1.087	1.042	1.291	0.989	0.921	0.132	0.123	0.162
									0.125	0.123	0.159	1.499	1.251	1.251	0.97	1.366	1.291	0.939	1.251	1.018	1.291	0.989	0.921	0.132	0.123	0.162				0.762	1.113	0.908	0.745	1.263	1.028	1.32	1.291		1.355	1.085	1.042	1.291	0.989	0.921	0.132	0.123	0.162
									0.125	0.123	0.159	1.496	1.248	1.248	0.963	1.365	1.291	0.934	1.251	1.019	1.289	0.988	0.921	0.132	0.123	0.162				0.764	1.112	0.9	0.743	1.264	1.022	1.316	1.294		1.356	1.084	1.042	1.289	0.988	0.921	0.132	0.123	0.162
									0.125	0.123	0.159	1.492	1.246	1.246	0.959	1.363	1.292	0.931	1.252	1.016	1.287	0.987	0.92	0.132	0.123	0.162				0.763	1.111	0.892	0.741	1.265	1.017	1.316	1.295		1.357	1.081	1.042	1.287	0.987	0.92	0.132	0.123	0.162
									0.125	0.123	0.159	1.488	1.246	1.246	0.955	1.361	1.29	0.927	1.249	1.014	1.285	0.986	0.92	0.132	0.123	0.162				0.764	1.11	0.883	0.741	1.267	1.013	1.315	1.297		1.355	1.079	1.042	1.285	0.986	0.92	0.132	0.123	0.162
									0.125	0.123	0.159	1.486	1.245	1.245	0.951	1.36	1.292	0.924	1.246	1.015	1.285	0.986	0.919	0.132	0.123	0.162				0.764	1.109	0.877	0.741	1.267	1.009	1.312	1.293		1.353	1.077	1.043	1.285	0.986	0.919	0.132	0.123	0.162
									0.125	0.123	0.159	1.484	1.242	1.242	0.947	1.359	1.291	0.92	1.244	1.016	1.284	0.986	0.92	0.132	0.123	0.162				0.766	1.108	0.87	0.739	1.268	1.006	1.312	1.295		1.351	1.077	1.044	1.284	0.986	0.92	0.132	0.123	0.162
									0.125	0.123	0.159	1.483	1.242	1.242	0.943	1.359	1.292	0.914	1.243	1.018	1.286	0.986	0.919	0.132	0.123	0.162				0.768	1.105	0.863	0.738	1.266	0.999	1.309	1.296		1.349	1.076	1.048	1.286	0.986	0.919	0.132	0.123	0.162
									0.125	0.123	0.159	1.477	1.24	1.24	0.942	1.359	1.292	0.909	1.242	1.018	1.283	0.986	0.918	0.132	0.123	0.162				0.767	1.107	0.859	0.736	1.263	0.997	1.309	1.297		1.35	1.076	1.048	1.283	0.986	0.918	0.132	0.123	0.162
									0.125	0.123	0.159	1.47	1.236	1.236	0.938	1.358	1.291	0.905	1.241	1.018	1.283	0.986	0.916	0.132	0.123	0.162				0.77	1.107	0.854	0.734	1.262	0.993	1.308	1.299		1.349	1.074	1.048	1.283	0.986	0.916	0.132	0.123	0.162
									0.125	0.123	0.159	1.466	1.232	1.232	0.929	1.36	1.292	0.901	1.24	1.017	1.281	0.985	0.914	0.132	0.123	0.162				0.771	1.104	0.846	0.731	1.261	0.987	1.305	1.297		1.346	1.071	1.046	1.281	0.985	0.914	0.132	0.123	0.162
									0.125	0.123	0.159	1.463	1.23	1.23	0.923	1.361	1.292	0.895	1.239	1.017	1.28	0.984	0.913	0.132	0.123	0.162				0.771	1.102	0.838	0.73	1.261	0.981	1.302	1.297		1.345	1.069	1.045	1.28	0.984	0.913	0.132	0.123	0.162
									0.125	0.123	0.159	1.459	1.23	1.23	0.919	1.36	1.294	0.89	1.239	1.018	1.277	0.983	0.91	0.132	0.123	0.162				0.773	1.099	0.833	0.728	1.259	0.976	1.303	1.299		1.342	1.067	1.042	1.277	0.983	0.91	0.132	0.123	0.162
									0.125	0.123	0.159	1.46	1.23	1.23	0.912	1.359	1.295	0.884	1.239	1.017	1.273	0.984	0.909	0.132	0.123	0.162				0.774	1.096	0.826	0.727	1.257	0.974	1.302	1.299		1.339	1.065	1.042	1.273	0.984	0.909	0.132	0.123	0.162
								36	0.125	0.123	0.159	1.461	1.233	1.233	0.904	1.357	1.297	0.881	1.237	1.017	1.27	0.983	0.908	0.132	0.123	0.162			36	0.777	1.095	0.82	0.724	1.256	0.972	1.3	1.297		1.335	1.063	1.042	1.27	0.983	0.908	0.132	0.123	0.162
									0.125	0.123	0.158	1.462	1.234	1.234	0.898	1.354	1.298	0.877	1.235	1.017	1.268	0.983	0.908	0.132	0.123	0.162				0.777	1.094	0.815	0.722	1.252	0.968	1.299	1.295		1.331	1.06	1.04	1.268	0.983	0.908	0.132	0.123	0.162
									0.125	0.123	0.159	1.461	1.233	1.233	0.89	1.355	1.302	0.875	1.236	1.016	1.265	0.984	0.907	0.132	0.123	0.162				0.778	1.094	0.811	0.72	1.253	0.966	1.299	1.292		1.329	1.057	1.039	1.265	0.984	0.907	0.132	0.123	0.162
									0.125	0.123	0.159	1.456	1.233	1.233	0.886	1.358	1.303	0.873	1.234	1.016	1.259	0.983	0.907	0.132	0.123	0.162				0.777	1.093	0.806	0.719	1.253	0.962	1.299	1.29		1.324	1.055	1.04	1.259	0.983	0.907	0.132	0.123	0.162
									0.125	0.122	0.159	1.455	1.232	1.232	0.882	1.359	1.302	0.87	1.231	1.018	1.252	0.982	0.907	0.132	0.123	0.162				0.779	1.092	0.803	0.717	1.252	0.958	1.296	1.29		1.323	1.053	1.042	1.252	0.982	0.907	0.132	0.123	0.162
									0.125	0.122	0.159	1.454	1.235	1.235	0.877	1.357	1.301	0.864	1.23	1.019	1.248	0.982	0.905	0.132	0.123	0.162				0.78	1.091	0.798	0.717	1.25	0.956	1.295	1.29		1.325	1.051	1.041	1.248	0.982	0.905	0.132	0.123	0.162
									0.125	0.122	0.159	1.452	1.236	1.236	0.872	1.358	1.303	0.86	1.227	1.022	1.247	0.983	0.905	0.132	0.123	0.162				0.782	1.087	0.795	0.717	1.246	0.952	1.296	1.291		1.326	1.051	1.042	1.247	0.983	0.905	0.132	0.123	0.162
									0.125	0.122	0.159	1.449	1.236	1.236	0.868	1.358	1.308	0.858	1.225	1.019	1.245	0.984	0.903	0.132	0.123	0.162				0.783	1.085	0.791	0.716	1.247	0.95	1.293	1.294		1.326	1.05	1.042	1.245	0.984	0.903	0.132	0.123	0.162
									0.125	0.122	0.159	1.447	1.237	1.237	0.866	1.356	1.31	0.856	1.225	1.018	1.245	0.984	0.904	0.132	0.123	0.162				0.785	1.083	0.785	0.715	1.246	0.949	1.291	1.296		1.328	1.05	1.04	1.245	0.984	0.904	0.132	0.123	0.162
									0.125	0.122	0.159	1.44	1.236	1.236	0.865	1.354	1.31	0.852	1.226	1.015	1.243	0.985	0.903	0.132	0.123	0.162				0.786	1.082	0.782	0.713	1.245	0.947	1.291	1.3		1.331	1.05	1.039	1.243	0.985	0.903	0.132	0.123	0.162
									0.125	0.122	0.158	1.431	1.236	1.236	0.858	1.355	1.311	0.845	1.227	1.014	1.241	0.984	0.902	0.132	0.123	0.162				0.786	1.081	0.78	0.712	1.243	0.945	1.292	1.301		1.331	1.047	1.039	1.241	0.984	0.902	0.132	0.123	0.162
									0.125	0.122	0.158	1.425	1.235	1.235	0.85	1.358	1.31	0.841	1.226	1.013	1.239	0.984	0.902	0.132	0.123	0.162				0.788	1.081	0.777	0.712	1.243	0.941	1.293	1.301		1.333	1.044	1.038	1.239	0.984	0.902	0.132	0.123	0.162
									0.125	0.122	0.158	1.422	1.234	1.234	0.844	1.356	1.31	0.836	1.224	1.011	1.237	0.984	0.9	0.132	0.123	0.162				0.788	1.078	0.772	0.711	1.242	0.937	1.292	1.302		1.334	1.041	1.039	1.237	0.984	0.9	0.132	0.123	0.162
									0.125	0.122	0.158	1.42	1.233	1.233	0.838	1.357	1.307	0.832	1.221	1.008	1.234	0.984	0.9	0.132	0.123	0.162				0.787	1.077	0.768	0.712	1.24	0.935	1.291	1.303		1.335	1.038	1.036	1.234	0.984	0.9	0.132	0.123	0.162
									0.125	0.122	0.158	1.418	1.23	1.23	0.832	1.357	1.306	0.828	1.222	1.005	1.233	0.985	0.899	0.132	0.123	0.162				0.788	1.077	0.766	0.71	1.239	0.933	1.288	1.3		1.335	1.039	1.037	1.233	0.985	0.899	0.132	0.123	0.162
									0.125	0.122	0.158	1.414	1.228	1.228	0.827	1.359	1.303	0.826	1.222	1.003	1.231	0.984	0.898	0.132	0.123	0.162				0.79	1.076	0.762	0.711	1.238	0.93	1.284	1.296		1.332	1.037	1.039	1.231	0.984	0.898	0.132	0.123	0.162
									0.125	0.122	0.158	1.412	1.226	1.226	0.821	1.362	1.303	0.826	1.22	1.001	1.228	0.983	0.898	0.133	0.123	0.162				0.79	1.075	0.759	0.708	1.239	0.927	1.278	1.293		1.329	1.034	1.041	1.228	0.983	0.898	0.133	0.123	0.162
									0.125	0.122	0.158	1.409	1.225	1.225	0.817	1.363	1.302	0.825	1.217	0.999	1.225	0.983	0.898	0.133	0.123	0.162				0.791	1.075	0.757	0.703	1.239	0.925	1.275	1.292		1.328	1.032	1.042	1.225	0.983	0.898	0.133	0.123	0.162
									0.125	0.122	0.158	1.405	1.223	1.223	0.818	1.363	1.302	0.822	1.217	0.999	1.223	0.983	0.897	0.133	0.123	0.162				0.791	1.075	0.754	0.699	1.238	0.924	1.27	1.289		1.328	1.029	1.042	1.223	0.983	0.897	0.133	0.123	0.162
									0.125	0.122	0.158	1.398	1.22	1.22	0.816	1.362	1.302	0.818	1.216	1	1.222	0.982	0.895	0.133	0.123	0.162				0.792	1.074	0.752	0.696	1.235	0.922	1.263	1.289		1.325	1.028	1.042	1.222	0.982	0.895	0.133	0.123	0.162
									0.125	0.122	0.158	1.394	1.218	1.218	0.815	1.362	1.302	0.813	1.215	0.999	1.22	0.982	0.894	0.133	0.123	0.162				0.794	1.077	0.751	0.693	1.232	0.921	1.259	1.289		1.325	1.027	1.041	1.22	0.982	0.894	0.133	0.123	0.162
								37	0.125	0.122	0.158	1.392	1.216	1.216	0.813	1.362	1.3	0.81	1.214	0.997	1.218	0.983	0.892	0.133	0.123	0.162			37	0.793	1.076	0.749	0.691	1.23	0.92	1.254	1.288		1.325	1.025	1.042	1.218	0.983	0.892	0.133	0.123	0.162
									0.125	0.122	0.158	1.392	1.214	1.214	0.81	1.362	1.299	0.808	1.213	0.996	1.217	0.982	0.892	0.133	0.123	0.162				0.795	1.077	0.749	0.69	1.228	0.915	1.252	1.289		1.325	1.023	1.042	1.217	0.982	0.892	0.133	0.123	0.162
									0.125	0.122	0.158	1.395	1.213	1.213	0.805	1.363	1.298	0.807	1.212	0.993	1.214	0.982	0.89	0.133	0.123	0.162				0.795	1.074	0.747	0.689	1.228	0.911	1.248	1.29		1.323	1.021	1.042	1.214	0.982	0.89	0.133	0.123	0.162
									0.125	0.122	0.158	1.393	1.212	1.212	0.804	1.364	1.298	0.804	1.212	0.992	1.21	0.981	0.889	0.133	0.123	0.162				0.796	1.074	0.746	0.69	1.228	0.909	1.246	1.29		1.321	1.02	1.043	1.21	0.981	0.889	0.133	0.123	0.162
									0.125	0.122	0.158	1.393	1.212	1.212	0.803	1.363	1.297	0.803	1.211	0.989	1.207	0.982	0.888	0.133	0.123	0.162				0.798	1.074	0.743	0.691	1.228	0.907	1.245	1.287		1.321	1.019	1.043	1.207	0.982	0.888	0.133	0.123	0.162
									0.125	0.122	0.158	1.391	1.211	1.211	0.798	1.365	1.293	0.8	1.21	0.987	1.203	0.983	0.888	0.133	0.123	0.162				0.799	1.071	0.742	0.69	1.226	0.906	1.238	1.286		1.321	1.017	1.043	1.203	0.983	0.888	0.133	0.123	0.162
									0.125	0.122	0.158	1.389	1.209	1.209	0.792	1.365	1.292	0.795	1.208	0.986	1.201	0.983	0.887	0.133	0.123	0.162				0.8	1.073	0.742	0.69	1.224	0.904	1.233	1.287		1.32	1.015	1.043	1.201	0.983	0.887	0.133	0.123	0.162
									0.125	0.122	0.158	1.39	1.205	1.205	0.787	1.365	1.29	0.792	1.209	0.986	1.197	0.983	0.887	0.133	0.123	0.162				0.799	1.073	0.74	0.69	1.227	0.902	1.229	1.29		1.321	1.015	1.043	1.197	0.983	0.887	0.133	0.123	0.162
									0.125	0.122	0.158	1.389	1.206	1.206	0.781	1.363	1.289	0.79	1.208	0.986	1.196	0.982	0.885	0.133	0.123	0.162				0.799	1.07	0.739	0.689	1.227	0.899	1.222	1.288		1.32	1.012	1.042	1.196	0.982	0.885	0.133	0.123	0.162
									0.125	0.122	0.158	1.389	1.208	1.208	0.779	1.361	1.287	0.789	1.206	0.986	1.194	0.982	0.884	0.133	0.123	0.162				0.797	1.069	0.737	0.689	1.227	0.898	1.218	1.285		1.318	1.013	1.041	1.194	0.982	0.884	0.133	0.123	0.162
									0.125	0.122	0.158	1.385	1.207	1.207	0.779	1.36	1.289	0.786	1.203	0.985	1.193	0.981	0.884	0.133	0.123	0.162				0.798	1.068	0.736	0.688	1.225	0.894	1.215	1.285		1.314	1.011	1.041	1.193	0.981	0.884	0.133	0.123	0.162
									0.125	0.122	0.158	1.379	1.209	1.209	0.777	1.363	1.292	0.782	1.204	0.985	1.192	0.981	0.883	0.133	0.123	0.162				0.801	1.07	0.735	0.688	1.224	0.892	1.208	1.286		1.313	1.008	1.04	1.192	0.981	0.883	0.133	0.123	0.162
									0.125	0.122	0.158	1.374	1.209	1.209	0.774	1.362	1.291	0.778	1.202	0.986	1.191	0.981	0.884	0.133	0.123	0.162				0.802	1.07	0.733	0.687	1.225	0.891	1.2	1.284		1.311	1.006	1.04	1.191	0.981	0.884	0.133	0.123	0.162
									0.125	0.122	0.158	1.373	1.208	1.208	0.773	1.363	1.292	0.778	1.201	0.986	1.189	0.981	0.885	0.133	0.123	0.162				0.803	1.071	0.729	0.686	1.223	0.887	1.193	1.281		1.311	1.005	1.041	1.189	0.981	0.885	0.133	0.123	0.162
									0.125	0.122	0.158	1.373	1.204	1.204	0.77	1.367	1.291	0.775	1.198	0.985	1.188	0.98	0.883	0.133	0.123	0.162				0.807	1.068	0.726	0.687	1.221	0.885	1.192	1.28		1.311	1.002	1.041	1.188	0.98	0.883	0.133	0.123	0.162
									0.125	0.122	0.158	1.369	1.202	1.202	0.77	1.367	1.29	0.775	1.196	0.983	1.188	0.979	0.883	0.133	0.123	0.162				0.807	1.067	0.725	0.685	1.218	0.882	1.187	1.277		1.31	1	1.041	1.188	0.979	0.883	0.133	0.123	0.162
									0.125	0.122	0.158	1.369	1.202	1.202	0.768	1.367	1.29	0.775	1.195	0.982	1.187	0.98	0.883	0.133	0.123	0.162				0.808	1.066	0.723	0.682	1.217	0.881	1.182	1.277		1.309	0.999	1.041	1.187	0.98	0.883	0.133	0.123	0.162
									0.125	0.122	0.158	1.364	1.2	1.2	0.766	1.37	1.287	0.772	1.194	0.981	1.186	0.979	0.883	0.133	0.123	0.162				0.807	1.065	0.72	0.68	1.215	0.879	1.174	1.276		1.312	0.999	1.04	1.186	0.979	0.883	0.133	0.123	0.162
									0.125	0.122	0.158	1.36	1.201	1.201	0.763	1.369	1.289	0.77	1.193	0.979	1.184	0.979	0.883	0.133	0.123	0.162				0.809	1.063	0.719	0.679	1.213	0.878	1.168	1.274		1.315	0.995	1.04	1.184	0.979	0.883	0.133	0.123	0.162
									0.125	0.122	0.158	1.354	1.201	1.201	0.758	1.366	1.289	0.769	1.195	0.977	1.183	0.98	0.881	0.133	0.123	0.162				0.81	1.064	0.719	0.677	1.21	0.878	1.165	1.276		1.316	0.991	1.041	1.183	0.98	0.881	0.133	0.123	0.162
									0.125	0.122	0.158	1.351	1.202	1.202	0.757	1.366	1.289	0.768	1.192	0.975	1.184	0.979	0.881	0.133	0.123	0.162				0.812	1.062	0.719	0.677	1.209	0.878	1.159	1.275		1.319	0.988	1.041	1.184	0.979	0.881	0.133	0.123	0.162
								38	0.125	0.122	0.158	1.348	1.2	1.2	0.756	1.368	1.291	0.767	1.188	0.972	1.183	0.98	0.88	0.133	0.123	0.162			38	0.812	1.06	0.718	0.676	1.209	0.877	1.154	1.273		1.319	0.986	1.043	1.183	0.98	0.88	0.133	0.123	0.162
									0.125	0.122	0.158	1.341	1.2	1.2	0.754	1.369	1.29	0.766	1.187	0.97	1.181	0.98	0.879	0.133	0.123	0.162				0.814	1.06	0.715	0.676	1.206	0.876	1.153	1.273		1.318	0.984	1.044	1.181	0.98	0.879	0.133	0.123	0.162
									0.125	0.122	0.158	1.335	1.199	1.199	0.753	1.371	1.295	0.765	1.186	0.966	1.179	0.979	0.878	0.133	0.123	0.162				0.817	1.061	0.716	0.674	1.203	0.875	1.15	1.271		1.316	0.983	1.047	1.179	0.979	0.878	0.133	0.123	0.162
									0.125	0.122	0.158	1.331	1.2	1.2	0.751	1.37	1.294	0.766	1.187	0.965	1.177	0.979	0.878	0.133	0.123	0.162				0.818	1.06	0.713	0.674	1.201	0.874	1.145	1.273		1.316	0.98	1.048	1.177	0.979	0.878	0.133	0.123	0.162
									0.125	0.122	0.158	1.328	1.199	1.199	0.751	1.37	1.295	0.766	1.188	0.965	1.176	0.978	0.879	0.133	0.123	0.162				0.82	1.06	0.712	0.675	1.2	0.872	1.141	1.271		1.317	0.979	1.048	1.176	0.978	0.879	0.133	0.123	0.162
									0.125	0.122	0.158	1.326	1.198	1.198	0.748	1.371	1.296	0.763	1.188	0.962	1.173	0.979	0.879	0.133	0.123	0.162				0.82	1.058	0.713	0.675	1.199	0.872	1.138	1.271		1.317	0.978	1.047	1.173	0.979	0.879	0.133	0.123	0.162
									0.125	0.122	0.158	1.325	1.197	1.197	0.747	1.374	1.294	0.76	1.187	0.963	1.172	0.979	0.877	0.133	0.123	0.162				0.822	1.057	0.712	0.675	1.198	0.873	1.135	1.27		1.316	0.979	1.048	1.172	0.979	0.877	0.133	0.123	0.162
									0.125	0.122	0.158	1.322	1.194	1.194	0.747	1.376	1.293	0.758	1.187	0.963	1.17	0.978	0.876	0.133	0.123	0.162				0.822	1.055	0.711	0.674	1.196	0.87	1.132	1.27		1.315	0.977	1.047	1.17	0.978	0.876	0.133	0.123	0.162
									0.125	0.122	0.157	1.321	1.191	1.191	0.747	1.376	1.296	0.755	1.187	0.964	1.166	0.979	0.878	0.133	0.123	0.162				0.823	1.053	0.713	0.673	1.194	0.871	1.125	1.27		1.315	0.975	1.046	1.166	0.979	0.878	0.133	0.123	0.162
									0.125	0.122	0.157	1.322	1.189	1.189	0.744	1.376	1.295	0.753	1.186	0.964	1.165	0.979	0.878	0.133	0.123	0.162				0.823	1.051	0.709	0.672	1.193	0.87	1.123	1.271		1.314	0.973	1.046	1.165	0.979	0.878	0.133	0.123	0.162
									0.125	0.122	0.157	1.32	1.187	1.187	0.741	1.375	1.296	0.748	1.182	0.965	1.164	0.978	0.877	0.133	0.123	0.162				0.824	1.05	0.708	0.67	1.19	0.868	1.117	1.272		1.313	0.971	1.048	1.164	0.978	0.877	0.133	0.123	0.162
									0.125	0.122	0.157	1.317	1.186	1.186	0.737	1.372	1.297	0.744	1.178	0.965	1.162	0.978	0.876	0.133	0.123	0.162				0.826	1.05	0.708	0.668	1.189	0.867	1.109	1.271		1.31	0.969	1.047	1.162	0.978	0.876	0.133	0.123	0.162
									0.125	0.122	0.157	1.314	1.183	1.183	0.733	1.373	1.297	0.742	1.176	0.963	1.161	0.977	0.876	0.133	0.123	0.162				0.826	1.047	0.71	0.668	1.189	0.864	1.104	1.271		1.31	0.967	1.046	1.161	0.977	0.876	0.133	0.123	0.162
									0.125	0.122	0.157	1.316	1.183	1.183	0.731	1.373	1.295	0.739	1.172	0.96	1.159	0.976	0.876	0.133	0.123	0.162				0.827	1.046	0.709	0.667	1.186	0.863	1.1	1.272		1.307	0.966	1.044	1.159	0.976	0.876	0.133	0.123	0.162
									0.125	0.122	0.157	1.318	1.184	1.184	0.731	1.374	1.292	0.738	1.171	0.959	1.157	0.977	0.875	0.133	0.123	0.162				0.827	1.045	0.708	0.667	1.186	0.86	1.096	1.273		1.306	0.963	1.045	1.157	0.977	0.875	0.133	0.123	0.162
									0.125	0.122	0.157	1.322	1.183	1.183	0.727	1.374	1.29	0.736	1.171	0.958	1.156	0.977	0.874	0.133	0.123	0.162				0.828	1.043	0.705	0.667	1.184	0.859	1.091	1.273		1.308	0.961	1.047	1.156	0.977	0.874	0.133	0.123	0.162
									0.125	0.122	0.157	1.32	1.18	1.18	0.722	1.375	1.288	0.733	1.168	0.956	1.153	0.977	0.873	0.133	0.123	0.162				0.828	1.043	0.705	0.667	1.183	0.858	1.085	1.271		1.308	0.959	1.046	1.153	0.977	0.873	0.133	0.123	0.162
									0.125	0.122	0.157	1.317	1.177	1.177	0.718	1.375	1.288	0.73	1.163	0.954	1.15	0.977	0.872	0.133	0.123	0.162				0.826	1.042	0.705	0.667	1.182	0.857	1.081	1.271		1.309	0.959	1.046	1.15	0.977	0.872	0.133	0.123	0.162
									0.125	0.122	0.157	1.316	1.176	1.176	0.716	1.376	1.289	0.727	1.163	0.954	1.149	0.977	0.872	0.133	0.123	0.162				0.827	1.041	0.704	0.664	1.183	0.854	1.077	1.273		1.309	0.959	1.047	1.149	0.977	0.872	0.133	0.123	0.162
									0.125	0.122	0.157	1.313	1.175	1.175	0.713	1.375	1.291	0.724	1.159	0.954	1.147	0.977	0.873	0.133	0.123	0.162				0.828	1.038	0.704	0.664	1.182	0.854	1.072	1.275		1.307	0.96	1.047	1.147	0.977	0.873	0.133	0.123	0.162
									0.125	0.122	0.157	1.309	1.173	1.173	0.708	1.375	1.29	0.72	1.158	0.953	1.146	0.977	0.872	0.133	0.123	0.162				0.828	1.037	0.701	0.664	1.181	0.855	1.067	1.274		1.307	0.957	1.049	1.146	0.977	0.872	0.133	0.123	0.162
								39	0.125	0.122	0.157	1.307	1.172	1.172	0.705	1.376	1.286	0.718	1.154	0.953	1.143	0.977	0.868	0.133	0.123	0.162			39	0.828	1.037	0.7	0.663	1.179	0.856	1.064	1.275		1.303	0.956	1.05	1.143	0.977	0.868	0.133	0.123	0.162
									0.125	0.122	0.157	1.303	1.173	1.173	0.699	1.373	1.286	0.714	1.151	0.952	1.141	0.977	0.868	0.133	0.123	0.162				0.825	1.037	0.699	0.664	1.178	0.856	1.06	1.273		1.301	0.955	1.049	1.141	0.977	0.868	0.133	0.123	0.162
									0.125	0.122	0.157	1.3	1.172	1.172	0.697	1.375	1.284	0.712	1.148	0.952	1.14	0.977	0.868	0.133	0.123	0.162				0.823	1.037	0.699	0.666	1.177	0.855	1.056	1.27		1.302	0.954	1.049	1.14	0.977	0.868	0.133	0.123	0.162
									0.125	0.122	0.157	1.297	1.17	1.17	0.694	1.373	1.283	0.711	1.146	0.951	1.137	0.976	0.866	0.133	0.123	0.162				0.82	1.035	0.697	0.666	1.176	0.857	1.052	1.269		1.303	0.953	1.047	1.137	0.976	0.866	0.133	0.123	0.162
									0.125	0.122	0.157	1.294	1.17	1.17	0.692	1.371	1.283	0.709	1.145	0.947	1.136	0.975	0.863	0.133	0.123	0.162				0.818	1.038	0.697	0.666	1.177	0.856	1.047	1.271		1.303	0.952	1.046	1.136	0.975	0.863	0.133	0.123	0.162
									0.125	0.122	0.157	1.293	1.17	1.17	0.689	1.368	1.279	0.706	1.142	0.946	1.133	0.974	0.862	0.133	0.123	0.162				0.816	1.038	0.699	0.666	1.177	0.856	1.04	1.269		1.303	0.95	1.046	1.133	0.974	0.862	0.133	0.123	0.162
									0.125	0.122	0.157	1.291	1.171	1.171	0.686	1.366	1.279	0.704	1.14	0.945	1.131	0.974	0.86	0.133	0.123	0.162				0.813	1.04	0.7	0.665	1.178	0.855	1.036	1.267		1.303	0.948	1.046	1.131	0.974	0.86	0.133	0.123	0.162
									0.125	0.122	0.157	1.29	1.173	1.173	0.685	1.365	1.279	0.702	1.138	0.944	1.128	0.974	0.86	0.133	0.123	0.162				0.81	1.039	0.7	0.664	1.175	0.856	1.03	1.266		1.301	0.946	1.047	1.128	0.974	0.86	0.133	0.123	0.162
									0.125	0.122	0.157	1.286	1.173	1.173	0.681	1.365	1.28	0.701	1.136	0.944	1.126	0.973	0.861	0.133	0.123	0.162				0.806	1.039	0.699	0.663	1.173	0.856	1.025	1.266		1.299	0.946	1.048	1.126	0.973	0.861	0.133	0.123	0.162
									0.125	0.122	0.157	1.281	1.177	1.177	0.678	1.363	1.281	0.701	1.134	0.943	1.124	0.973	0.86	0.133	0.123	0.162				0.803	1.039	0.698	0.662	1.173	0.853	1.021	1.264		1.296	0.945	1.048	1.124	0.973	0.86	0.133	0.123	0.162
									0.125	0.122	0.157	1.277	1.176	1.176	0.677	1.364	1.281	0.698	1.136	0.942	1.123	0.973	0.859	0.133	0.123	0.162				0.801	1.039	0.697	0.662	1.17	0.853	1.016	1.262		1.294	0.944	1.049	1.123	0.973	0.859	0.133	0.123	0.162
									0.125	0.122	0.157	1.273	1.175	1.175	0.675	1.364	1.279	0.696	1.136	0.943	1.122	0.973	0.859	0.134	0.123	0.162				0.8	1.041	0.696	0.661	1.169	0.851	1.011	1.258		1.294	0.945	1.048	1.122	0.973	0.859	0.134	0.123	0.162
									0.125	0.122	0.157	1.267	1.172	1.172	0.671	1.363	1.281	0.693	1.135	0.943	1.121	0.972	0.858	0.134	0.123	0.162				0.798	1.041	0.695	0.662	1.167	0.848	1.006	1.256		1.292	0.944	1.048	1.121	0.972	0.858	0.134	0.123	0.162
									0.125	0.122	0.156	1.259	1.169	1.169	0.669	1.364	1.278	0.691	1.136	0.945	1.121	0.972	0.856	0.134	0.123	0.162				0.797	1.039	0.696	0.662	1.166	0.846	0.999	1.254		1.289	0.943	1.046	1.121	0.972	0.856	0.134	0.123	0.162
									0.125	0.122	0.156	1.254	1.166	1.166	0.665	1.365	1.275	0.69	1.135	0.946	1.121	0.972	0.856	0.134	0.123	0.162				0.795	1.035	0.697	0.661	1.165	0.845	0.994	1.253		1.286	0.942	1.044	1.121	0.972	0.856	0.134	0.123	0.162
									0.125	0.122	0.156	1.248	1.166	1.166	0.663	1.366	1.275	0.685	1.132	0.946	1.121	0.973	0.854	0.134	0.123	0.162				0.792	1.033	0.697	0.661	1.164	0.843	0.988	1.253		1.288	0.941	1.044	1.121	0.973	0.854	0.134	0.123	0.162
									0.125	0.122	0.156	1.246	1.163	1.163	0.659	1.369	1.275	0.684	1.132	0.945	1.12	0.973	0.854	0.134	0.123	0.162				0.789	1.032	0.695	0.661	1.16	0.84	0.984	1.253		1.286	0.939	1.045	1.12	0.973	0.854	0.134	0.123	0.162
									0.125	0.122	0.156	1.239	1.162	1.162	0.655	1.371	1.273	0.683	1.129	0.945	1.118	0.973	0.852	0.134	0.123	0.162				0.786	1.033	0.694	0.662	1.159	0.838	0.98	1.252		1.285	0.939	1.047	1.118	0.973	0.852	0.134	0.123	0.162
									0.125	0.122	0.156	1.235	1.162	1.162	0.653	1.373	1.273	0.678	1.128	0.944	1.115	0.973	0.853	0.134	0.123	0.162				0.78	1.032	0.695	0.663	1.16	0.839	0.975	1.251		1.284	0.938	1.047	1.115	0.973	0.853	0.134	0.123	0.162
									0.125	0.122	0.156	1.231	1.16	1.16	0.648	1.374	1.27	0.675	1.125	0.943	1.112	0.973	0.853	0.134	0.123	0.162				0.777	1.031	0.695	0.664	1.157	0.838	0.971	1.251		1.284	0.938	1.048	1.112	0.973	0.853	0.134	0.123	0.162
									0.125	0.122	0.156	1.229	1.156	1.156	0.645	1.378	1.269	0.67	1.12	0.943	1.109	0.973	0.853	0.134	0.123	0.162				0.774	1.03	0.695	0.665	1.157	0.839	0.967	1.251		1.286	0.937	1.049	1.109	0.973	0.853	0.134	0.123	0.162
								40	0.125	0.122	0.156	1.224	1.153	1.153	0.643	1.379	1.268	0.667	1.117	0.944	1.109	0.973	0.853	0.134	0.123	0.162			40	0.77	1.03	0.695	0.666	1.156	0.838	0.963	1.256		1.285	0.937	1.048	1.109	0.973	0.853	0.134	0.123	0.162
									0.125	0.122	0.156	1.223	1.151	1.151	0.641	1.379	1.27	0.663	1.116	0.947	1.107	0.973	0.852	0.134	0.123	0.162				0.767	1.03	0.695	0.665	1.156	0.837	0.961	1.258		1.284	0.936	1.049	1.107	0.973	0.852	0.134	0.123	0.162
									0.125	0.122	0.156	1.224	1.147	1.147	0.64	1.381	1.268	0.662	1.112	0.946	1.105	0.973	0.851	0.134	0.123	0.162				0.76	1.033	0.695	0.664	1.157	0.837	0.956	1.26		1.284	0.935	1.048	1.105	0.973	0.851	0.134	0.123	0.162
									0.125	0.122	0.156	1.223	1.143	1.143	0.639	1.381	1.27	0.66	1.113	0.946	1.101	0.973	0.851	0.134	0.123	0.162				0.755	1.029	0.695	0.665	1.156	0.837	0.953	1.262		1.284	0.933	1.049	1.101	0.973	0.851	0.134	0.123	0.162
									0.125	0.122	0.156	1.219	1.143	1.143	0.637	1.378	1.268	0.657	1.111	0.945	1.098	0.973	0.851	0.134	0.123	0.162				0.752	1.027	0.695	0.663	1.157	0.838	0.949	1.262		1.282	0.932	1.048	1.098	0.973	0.851	0.134	0.123	0.162
									0.125	0.122	0.156	1.217	1.141	1.141	0.636	1.376	1.267	0.653	1.108	0.945	1.096	0.973	0.85	0.134	0.123	0.162				0.748	1.026	0.696	0.664	1.155	0.836	0.945	1.263		1.281	0.933	1.049	1.096	0.973	0.85	0.134	0.123	0.162
									0.125	0.122	0.156	1.216	1.141	1.141	0.635	1.378	1.267	0.651	1.108	0.945	1.095	0.973	0.849	0.134	0.123	0.162				0.743	1.027	0.697	0.664	1.153	0.835	0.941	1.264		1.284	0.932	1.049	1.095	0.973	0.849	0.134	0.123	0.162
									0.125	0.122	0.156	1.212	1.142	1.142	0.633	1.378	1.264	0.648	1.105	0.944	1.093	0.973	0.848	0.134	0.123	0.162				0.739	1.027	0.696	0.664	1.153	0.835	0.936	1.263		1.283	0.93	1.048	1.093	0.973	0.848	0.134	0.123	0.162
									0.125	0.122	0.156	1.209	1.14	1.14	0.631	1.376	1.262	0.645	1.104	0.943	1.094	0.975	0.848	0.134	0.123	0.162				0.735	1.026	0.696	0.663	1.149	0.833	0.933	1.263		1.281	0.928	1.047	1.094	0.975	0.848	0.134	0.123	0.162
									0.125	0.122	0.156	1.208	1.139	1.139	0.627	1.377	1.261	0.642	1.102	0.943	1.094	0.975	0.847	0.134	0.123	0.162				0.731	1.024	0.695	0.664	1.147	0.83	0.931	1.261		1.281	0.927	1.048	1.094	0.975	0.847	0.134	0.123	0.162
									0.125	0.122	0.156	1.207	1.138	1.138	0.624	1.376	1.261	0.64	1.101	0.941	1.093	0.976	0.847	0.134	0.123	0.162				0.728	1.022	0.696	0.664	1.147	0.83	0.93	1.262		1.28	0.927	1.048	1.093	0.976	0.847	0.134	0.123	0.162
									0.125	0.122	0.156	1.204	1.138	1.138	0.621	1.374	1.26	0.639	1.101	0.941	1.093	0.977	0.845	0.134	0.123	0.162				0.725	1.022	0.697	0.665	1.145	0.829	0.927	1.263		1.278	0.925	1.049	1.093	0.977	0.845	0.134	0.123	0.162
									0.125	0.122	0.156	1.201	1.139	1.139	0.62	1.373	1.258	0.639	1.101	0.938	1.093	0.977	0.845	0.134	0.123	0.162				0.72	1.02	0.697	0.666	1.144	0.828	0.923	1.262		1.276	0.925	1.051	1.093	0.977	0.845	0.134	0.123	0.162
									0.125	0.122	0.156	1.196	1.139	1.139	0.618	1.371	1.253	0.638	1.099	0.936	1.092	0.978	0.843	0.134	0.123	0.162				0.716	1.018	0.699	0.667	1.143	0.826	0.921	1.261		1.278	0.924	1.05	1.092	0.978	0.843	0.134	0.123	0.162
									0.126	0.122	0.156	1.191	1.14	1.14	0.617	1.372	1.251	0.634	1.098	0.937	1.092	0.977	0.842	0.134	0.123	0.162				0.712	1.019	0.699	0.668	1.142	0.825	0.918	1.262		1.279	0.923	1.049	1.092	0.977	0.842	0.134	0.123	0.162
									0.126	0.122	0.156	1.19	1.138	1.138	0.614	1.373	1.249	0.631	1.096	0.935	1.091	0.977	0.841	0.134	0.123	0.162				0.707	1.022	0.697	0.668	1.14	0.823	0.914	1.263		1.28	0.922	1.048	1.091	0.977	0.841	0.134	0.123	0.162
									0.126	0.122	0.156	1.188	1.138	1.138	0.611	1.376	1.246	0.63	1.091	0.932	1.09	0.976	0.841	0.134	0.123	0.162				0.702	1.022	0.698	0.668	1.136	0.824	0.908	1.264		1.281	0.923	1.048	1.09	0.976	0.841	0.134	0.123	0.162
									0.126	0.122	0.156	1.188	1.137	1.137	0.609	1.377	1.243	0.629	1.088	0.932	1.089	0.977	0.842	0.134	0.123	0.162				0.695	1.019	0.698	0.669	1.135	0.824	0.904	1.262		1.284	0.924	1.048	1.089	0.977	0.842	0.134	0.123	0.162
									0.126	0.122	0.156	1.19	1.136	1.136	0.607	1.376	1.242	0.627	1.085	0.93	1.089	0.976	0.841	0.134	0.123	0.162				0.69	1.017	0.699	0.669	1.133	0.824	0.9	1.263		1.285	0.923	1.05	1.089	0.976	0.841	0.134	0.123	0.162
									0.126	0.122	0.156	1.186	1.133	1.133	0.606	1.378	1.239	0.624	1.084	0.929	1.088	0.976	0.841	0.134	0.123	0.162				0.685	1.014	0.698	0.669	1.13	0.822	0.896	1.261		1.283	0.922	1.049	1.088	0.976	0.841	0.134	0.123	0.162
									0.126	0.122	0.156	1.181	1.13	1.13	0.606	1.378	1.235	0.622	1.081	0.929	1.087	0.976	0.841	0.134	0.123	0.162				0.68	1.014	0.695	0.669	1.129	0.822	0.892	1.259		1.283	0.921	1.049	1.087	0.976	0.841	0.134	0.123	0.162
								41	0.126	0.122	0.156	1.177	1.129	1.129	0.604	1.377	1.232	0.62	1.078	0.929	1.086	0.977	0.841	0.134	0.123	0.162			41	0.676	1.013	0.696	0.667	1.128	0.821	0.889	1.259		1.283	0.921	1.049	1.086	0.977	0.841	0.134	0.123	0.162
									0.126	0.122	0.156	1.174	1.128	1.128	0.603	1.377	1.23	0.618	1.077	0.93	1.084	0.977	0.84	0.134	0.123	0.162				0.67	1.011	0.697	0.669	1.126	0.821	0.885	1.258		1.282	0.919	1.048	1.084	0.977	0.84	0.134	0.123	0.162
									0.126	0.122	0.156	1.169	1.126	1.126	0.601	1.376	1.227	0.618	1.076	0.93	1.082	0.978	0.84	0.134	0.123	0.162				0.665	1.011	0.694	0.671	1.126	0.821	0.884	1.257		1.286	0.92	1.047	1.082	0.978	0.84	0.134	0.123	0.162
									0.126	0.122	0.156	1.164	1.124	1.124	0.598	1.374	1.227	0.616	1.075	0.93	1.081	0.979	0.84	0.134	0.123	0.162				0.66	1.011	0.692	0.671	1.125	0.819	0.882	1.257		1.289	0.921	1.047	1.081	0.979	0.84	0.134	0.123	0.162
									0.126	0.122	0.156	1.16	1.121	1.121	0.596	1.373	1.227	0.615	1.072	0.929	1.082	0.98	0.841	0.134	0.123	0.162				0.655	1.009	0.69	0.672	1.124	0.817	0.879	1.256		1.292	0.92	1.048	1.082	0.98	0.841	0.134	0.123	0.162
									0.126	0.122	0.156	1.157	1.119	1.119	0.595	1.372	1.227	0.613	1.071	0.929	1.081	0.98	0.841	0.134	0.123	0.162				0.65	1.009	0.689	0.673	1.125	0.815	0.877	1.255		1.294	0.918	1.047	1.081	0.98	0.841	0.134	0.123	0.162
									0.126	0.122	0.156	1.157	1.116	1.116	0.594	1.371	1.229	0.612	1.069	0.929	1.081	0.98	0.842	0.134	0.123	0.162				0.647	1.007	0.689	0.673	1.124	0.814	0.875	1.255		1.298	0.916	1.049	1.081	0.98	0.842	0.134	0.123	0.162
									0.126	0.122	0.156	1.155	1.116	1.116	0.591	1.373	1.229	0.611	1.066	0.928	1.08	0.981	0.843	0.134	0.123	0.162				0.642	1.008	0.69	0.674	1.123	0.816	0.872	1.254		1.3	0.917	1.048	1.08	0.981	0.843	0.134	0.123	0.162
									0.126	0.122	0.156	1.151	1.116	1.116	0.589	1.371	1.228	0.609	1.065	0.93	1.078	0.981	0.843	0.134	0.123	0.162				0.638	1.007	0.689	0.674	1.123	0.815	0.87	1.256		1.3	0.919	1.048	1.078	0.981	0.843	0.134	0.123	0.162
									0.126	0.122	0.156	1.147	1.116	1.116	0.588	1.371	1.227	0.606	1.063	0.929	1.078	0.981	0.842	0.134	0.123	0.162				0.634	1.005	0.69	0.674	1.123	0.815	0.867	1.256		1.301	0.919	1.048	1.078	0.981	0.842	0.134	0.123	0.162
									0.126	0.122	0.156	1.144	1.117	1.117	0.584	1.369	1.224	0.604	1.06	0.931	1.076	0.981	0.84	0.134	0.123	0.162				0.63	1.006	0.69	0.674	1.121	0.815	0.866	1.253		1.3	0.915	1.049	1.076	0.981	0.84	0.134	0.123	0.162
									0.126	0.122	0.156	1.141	1.114	1.114	0.584	1.369	1.223	0.601	1.062	0.93	1.075	0.982	0.84	0.134	0.123	0.162				0.627	1.005	0.693	0.676	1.12	0.816	0.865	1.252		1.301	0.915	1.049	1.075	0.982	0.84	0.134	0.123	0.162
									0.126	0.122	0.156	1.14	1.114	1.114	0.582	1.369	1.222	0.599	1.061	0.93	1.074	0.982	0.839	0.134	0.123	0.162				0.624	1.005	0.695	0.676	1.121	0.815	0.863	1.25		1.299	0.915	1.049	1.074	0.982	0.839	0.134	0.123	0.162
									0.126	0.122	0.156	1.135	1.112	1.112	0.579	1.369	1.222	0.597	1.058	0.93	1.074	0.982	0.838	0.134	0.123	0.162				0.621	1.002	0.694	0.676	1.119	0.813	0.86	1.248		1.298	0.913	1.048	1.074	0.982	0.838	0.134	0.123	0.162
									0.126	0.122	0.156	1.131	1.111	1.111	0.576	1.37	1.22	0.594	1.057	0.93	1.075	0.982	0.839	0.134	0.123	0.162				0.619	1.004	0.693	0.677	1.12	0.811	0.858	1.247		1.296	0.912	1.048	1.075	0.982	0.839	0.134	0.123	0.162
									0.126	0.122	0.156	1.129	1.109	1.109	0.574	1.371	1.22	0.591	1.055	0.93	1.075	0.982	0.839	0.134	0.123	0.162				0.617	1.003	0.693	0.677	1.117	0.811	0.857	1.245		1.292	0.911	1.047	1.075	0.982	0.839	0.134	0.123	0.162
									0.126	0.122	0.156	1.123	1.107	1.107	0.574	1.371	1.217	0.588	1.054	0.929	1.074	0.982	0.84	0.134	0.123	0.162				0.614	1.003	0.693	0.678	1.114	0.811	0.855	1.244		1.289	0.91	1.047	1.074	0.982	0.84	0.134	0.123	0.162
									0.126	0.122	0.156	1.119	1.106	1.106	0.573	1.37	1.215	0.585	1.052	0.929	1.072	0.981	0.841	0.134	0.123	0.162				0.612	1.001	0.692	0.679	1.112	0.812	0.852	1.242		1.29	0.909	1.045	1.072	0.981	0.841	0.134	0.123	0.162
									0.126	0.122	0.156	1.116	1.104	1.104	0.572	1.367	1.213	0.584	1.051	0.928	1.071	0.982	0.842	0.134	0.123	0.162				0.609	1.001	0.692	0.68	1.111	0.812	0.85	1.24		1.29	0.908	1.046	1.071	0.982	0.842	0.134	0.123	0.162
									0.126	0.122	0.156	1.11	1.102	1.102	0.572	1.365	1.211	0.582	1.05	0.928	1.07	0.983	0.843	0.134	0.123	0.162				0.606	1.001	0.692	0.68	1.112	0.81	0.849	1.238		1.289	0.908	1.046	1.07	0.983	0.843	0.134	0.123	0.162
									0.126	0.122	0.156	1.106	1.104	1.104	0.572	1.365	1.207	0.582	1.051	0.926	1.069	0.983	0.841	0.134	0.123	0.162				0.605	1.002	0.692	0.68	1.11	0.81	0.847	1.239		1.292	0.907	1.047	1.069	0.983	0.841	0.134	0.123	0.162
								42	0.126	0.122	0.156	1.105	1.103	1.103	0.572	1.366	1.206	0.58	1.049	0.925	1.068	0.984	0.841	0.134	0.123	0.162			42	0.603	1.003	0.693	0.681	1.108	0.809	0.845	1.242		1.292	0.908	1.047	1.068	0.984	0.841	0.134	0.123	0.162
									0.126	0.122	0.156	1.102	1.101	1.101	0.571	1.368	1.206	0.578	1.048	0.922	1.068	0.985	0.841	0.134	0.123	0.162				0.6	1.004	0.692	0.683	1.107	0.81	0.843	1.243		1.293	0.907	1.048	1.068	0.985	0.841	0.134	0.123	0.162
									0.126	0.122	0.156	1.102	1.1	1.1	0.57	1.367	1.203	0.576	1.046	0.92	1.068	0.985	0.841	0.134	0.123	0.162				0.599	1.002	0.693	0.684	1.108	0.81	0.841	1.243		1.293	0.908	1.049	1.068	0.985	0.841	0.134	0.123	0.162
									0.126	0.122	0.156	1.1	1.101	1.101	0.569	1.369	1.206	0.574	1.046	0.918	1.066	0.986	0.841	0.134	0.123	0.162				0.598	1.002	0.693	0.686	1.107	0.812	0.84	1.242		1.293	0.91	1.048	1.066	0.986	0.841	0.134	0.123	0.162
									0.126	0.122	0.156	1.099	1.099	1.099	0.568	1.369	1.204	0.574	1.045	0.918	1.065	0.986	0.841	0.134	0.123	0.162				0.596	1.001	0.692	0.687	1.105	0.813	0.835	1.241		1.291	0.91	1.046	1.065	0.986	0.841	0.134	0.123	0.162
									0.126	0.122	0.156	1.098	1.103	1.103	0.566	1.368	1.204	0.572	1.044	0.916	1.064	0.986	0.841	0.134	0.123	0.162				0.594	1.003	0.692	0.688	1.101	0.812	0.832	1.242		1.291	0.911	1.046	1.064	0.986	0.841	0.134	0.123	0.162
									0.126	0.122	0.156	1.095	1.103	1.103	0.566	1.366	1.206	0.571	1.039	0.914	1.063	0.985	0.84	0.134	0.123	0.162				0.592	1.004	0.693	0.689	1.1	0.809	0.828	1.24		1.291	0.912	1.046	1.063	0.985	0.84	0.134	0.123	0.162
									0.126	0.122	0.156	1.093	1.1	1.1	0.565	1.365	1.205	0.571	1.037	0.914	1.062	0.985	0.84	0.134	0.123	0.162				0.59	1.005	0.692	0.691	1.099	0.809	0.827	1.241		1.29	0.911	1.046	1.062	0.985	0.84	0.134	0.123	0.162
									0.126	0.122	0.156	1.091	1.099	1.099	0.566	1.364	1.204	0.57	1.036	0.914	1.061	0.986	0.84	0.134	0.123	0.162				0.589	1.004	0.695	0.692	1.099	0.808	0.825	1.24		1.293	0.912	1.046	1.061	0.986	0.84	0.134	0.123	0.162
									0.126	0.122	0.156	1.093	1.098	1.098	0.565	1.365	1.2	0.569	1.037	0.914	1.06	0.986	0.839	0.134	0.123	0.162				0.588	1.001	0.694	0.693	1.098	0.808	0.822	1.24		1.295	0.913	1.048	1.06	0.986	0.839	0.134	0.123	0.162
									0.126	0.122	0.156	1.094	1.096	1.096	0.565	1.365	1.197	0.569	1.034	0.913	1.06	0.986	0.84	0.134	0.123	0.162				0.587	1	0.695	0.695	1.099	0.807	0.821	1.24		1.298	0.91	1.05	1.06	0.986	0.84	0.134	0.123	0.162
									0.126	0.122	0.156	1.094	1.092	1.092	0.564	1.363	1.195	0.569	1.032	0.912	1.059	0.986	0.841	0.134	0.123	0.162				0.586	1.003	0.694	0.696	1.098	0.807	0.819	1.239		1.303	0.91	1.05	1.059	0.986	0.841	0.134	0.123	0.162
									0.126	0.122	0.156	1.093	1.092	1.092	0.564	1.361	1.195	0.567	1.032	0.913	1.058	0.986	0.841	0.134	0.123	0.162				0.585	1.004	0.693	0.696	1.098	0.807	0.818	1.238		1.304	0.909	1.05	1.058	0.986	0.841	0.134	0.123	0.162
									0.126	0.122	0.156	1.092	1.089	1.089	0.564	1.36	1.195	0.566	1.031	0.915	1.058	0.986	0.841	0.134	0.123	0.162				0.585	1.004	0.696	0.697	1.099	0.806	0.816	1.239		1.302	0.908	1.051	1.058	0.986	0.841	0.134	0.123	0.162
									0.126	0.122	0.156	1.09	1.087	1.087	0.564	1.359	1.193	0.567	1.031	0.914	1.057	0.986	0.841	0.134	0.123	0.162				0.585	1.005	0.695	0.699	1.099	0.807	0.813	1.24		1.302	0.908	1.05	1.057	0.986	0.841	0.134	0.123	0.162
									0.126	0.122	0.156	1.09	1.085	1.085	0.562	1.355	1.191	0.567	1.031	0.915	1.059	0.986	0.84	0.134	0.123	0.162				0.584	1.005	0.696	0.702	1.098	0.806	0.811	1.238		1.303	0.909	1.05	1.059	0.986	0.84	0.134	0.123	0.162
									0.126	0.122	0.156	1.089	1.081	1.081	0.562	1.353	1.19	0.568	1.031	0.915	1.061	0.986	0.84	0.134	0.123	0.162				0.584	1.004	0.695	0.703	1.097	0.807	0.81	1.239		1.307	0.909	1.051	1.061	0.986	0.84	0.134	0.123	0.162
									0.126	0.122	0.156	1.09	1.079	1.079	0.562	1.349	1.188	0.567	1.029	0.918	1.06	0.986	0.84	0.134	0.123	0.162				0.584	1.003	0.696	0.703	1.098	0.806	0.81	1.238		1.309	0.909	1.051	1.06	0.986	0.84	0.134	0.123	0.162
									0.126	0.122	0.156	1.091	1.077	1.077	0.56	1.347	1.187	0.567	1.029	0.92	1.061	0.986	0.84	0.134	0.123	0.162				0.583	1.004	0.696	0.704	1.096	0.806	0.808	1.237		1.308	0.907	1.053	1.061	0.986	0.84	0.134	0.123	0.162
									0.126	0.122	0.156	1.092	1.074	1.074	0.558	1.347	1.187	0.567	1.029	0.919	1.061	0.986	0.838	0.134	0.123	0.162				0.582	1.002	0.696	0.705	1.096	0.802	0.806	1.237		1.309	0.905	1.053	1.061	0.986	0.838	0.134	0.123	0.162
									0.126	0.122	0.156	1.091	1.076	1.076	0.557	1.343	1.188	0.567	1.027	0.92	1.061	0.986	0.837	0.134	0.123	0.162				0.581	1.002	0.694	0.707	1.095	0.801	0.804	1.236		1.31	0.903	1.052	1.061	0.986	0.837	0.134	0.123	0.162
								43	0.126	0.122	0.156	1.09	1.079	1.079	0.556	1.342	1.19	0.566	1.025	0.919	1.061	0.986	0.837	0.134	0.123	0.162			43	0.58	0.999	0.695	0.708	1.096	0.8	0.802	1.235		1.312	0.901	1.053	1.061	0.986	0.837	0.134	0.123	0.162
									0.126	0.122	0.156	1.086	1.085	1.085	0.557	1.341	1.187	0.565	1.024	0.916	1.061	0.986	0.835	0.134	0.123	0.162				0.58	0.997	0.694	0.71	1.096	0.799	0.801	1.236		1.314	0.9	1.053	1.061	0.986	0.835	0.134	0.123	0.162
									0.126	0.122	0.156	1.085	1.084	1.084	0.556	1.341	1.183	0.563	1.024	0.918	1.061	0.987	0.834	0.134	0.123	0.162				0.581	0.995	0.693	0.71	1.093	0.798	0.799	1.232		1.316	0.899	1.053	1.061	0.987	0.834	0.134	0.123	0.162
									0.126	0.122	0.156	1.086	1.084	1.084	0.555	1.342	1.18	0.562	1.023	0.916	1.062	0.987	0.833	0.134	0.123	0.162				0.581	0.995	0.695	0.712	1.093	0.799	0.798	1.232		1.316	0.897	1.053	1.062	0.987	0.833	0.134	0.123	0.162
									0.126	0.122	0.156	1.087	1.083	1.083	0.554	1.342	1.178	0.562	1.023	0.916	1.061	0.988	0.833	0.134	0.123	0.162				0.581	0.994	0.695	0.713	1.092	0.798	0.797	1.232		1.316	0.897	1.055	1.061	0.988	0.833	0.134	0.123	0.162
									0.126	0.122	0.156	1.088	1.082	1.082	0.554	1.342	1.174	0.561	1.02	0.916	1.061	0.988	0.834	0.134	0.123	0.162				0.581	0.992	0.696	0.714	1.089	0.798	0.797	1.234		1.315	0.898	1.055	1.061	0.988	0.834	0.134	0.123	0.162
									0.126	0.122	0.156	1.09	1.082	1.082	0.554	1.342	1.171	0.561	1.021	0.916	1.062	0.988	0.834	0.134	0.123	0.162				0.581	0.992	0.695	0.715	1.09	0.799	0.795	1.233		1.318	0.898	1.055	1.062	0.988	0.834	0.134	0.123	0.162
									0.126	0.122	0.156	1.09	1.08	1.08	0.555	1.342	1.171	0.56	1.019	0.914	1.063	0.987	0.833	0.134	0.123	0.162				0.581	0.992	0.696	0.717	1.087	0.799	0.794	1.233		1.32	0.898	1.053	1.063	0.987	0.833	0.134	0.123	0.162
									0.126	0.122	0.156	1.09	1.077	1.077	0.555	1.34	1.17	0.559	1.017	0.914	1.062	0.986	0.834	0.134	0.123	0.162				0.581	0.992	0.697	0.719	1.085	0.798	0.792	1.233		1.324	0.898	1.054	1.062	0.986	0.834	0.134	0.123	0.162
									0.126	0.122	0.156	1.092	1.072	1.072	0.554	1.341	1.169	0.558	1.017	0.913	1.062	0.987	0.833	0.134	0.123	0.162				0.581	0.993	0.695	0.721	1.086	0.796	0.791	1.234		1.325	0.898	1.055	1.062	0.987	0.833	0.134	0.123	0.162
									0.126	0.122	0.156	1.094	1.071	1.071	0.552	1.339	1.168	0.557	1.018	0.91	1.063	0.987	0.834	0.134	0.123	0.162				0.582	0.991	0.696	0.721	1.086	0.795	0.792	1.234		1.324	0.899	1.056	1.063	0.987	0.834	0.134	0.123	0.162
									0.126	0.122	0.156	1.097	1.072	1.072	0.552	1.337	1.166	0.557	1.016	0.909	1.062	0.987	0.835	0.134	0.123	0.162				0.583	0.991	0.697	0.722	1.087	0.794	0.792	1.233		1.324	0.898	1.055	1.062	0.987	0.835	0.134	0.123	0.162
									0.126	0.122	0.156	1.099	1.071	1.071	0.552	1.334	1.165	0.556	1.013	0.906	1.062	0.987	0.834	0.134	0.123	0.162				0.583	0.991	0.696	0.724	1.089	0.796	0.791	1.233		1.326	0.898	1.054	1.062	0.987	0.834	0.134	0.123	0.162
									0.126	0.122	0.156	1.099	1.072	1.072	0.552	1.335	1.162	0.555	1.012	0.906	1.062	0.988	0.833	0.134	0.123	0.162				0.584	0.989	0.697	0.725	1.089	0.797	0.79	1.234		1.329	0.898	1.054	1.062	0.988	0.833	0.134	0.123	0.162
									0.126	0.122	0.156	1.101	1.073	1.073	0.553	1.335	1.164	0.555	1.011	0.906	1.06	0.987	0.833	0.134	0.123	0.162				0.584	0.988	0.698	0.727	1.09	0.799	0.79	1.231		1.33	0.898	1.054	1.06	0.987	0.833	0.134	0.123	0.162
									0.126	0.122	0.156	1.102	1.07	1.07	0.554	1.335	1.165	0.554	1.01	0.906	1.059	0.987	0.833	0.134	0.123	0.162				0.585	0.988	0.7	0.729	1.09	0.797	0.789	1.23		1.331	0.896	1.054	1.059	0.987	0.833	0.134	0.123	0.162
									0.126	0.122	0.156	1.103	1.069	1.069	0.555	1.336	1.167	0.555	1.007	0.908	1.058	0.987	0.833	0.134	0.123	0.162				0.585	0.986	0.699	0.73	1.088	0.797	0.788	1.23		1.332	0.897	1.055	1.058	0.987	0.833	0.134	0.123	0.162
									0.126	0.122	0.156	1.105	1.069	1.069	0.555	1.336	1.167	0.555	1.005	0.909	1.059	0.987	0.832	0.134	0.123	0.162				0.586	0.986	0.699	0.729	1.087	0.796	0.787	1.23		1.335	0.896	1.057	1.059	0.987	0.832	0.134	0.123	0.162
									0.126	0.122	0.156	1.105	1.069	1.069	0.555	1.336	1.167	0.555	1.004	0.909	1.059	0.986	0.832	0.134	0.123	0.162				0.586	0.985	0.699	0.729	1.086	0.796	0.787	1.228		1.337	0.894	1.056	1.059	0.986	0.832	0.134	0.123	0.162
									0.126	0.122	0.156	1.107	1.067	1.067	0.556	1.334	1.167	0.555	1.001	0.909	1.059	0.987	0.833	0.134	0.123	0.162				0.587	0.988	0.7	0.731	1.086	0.793	0.786	1.228		1.338	0.892	1.056	1.059	0.987	0.833	0.134	0.123	0.162
									0.126	0.123	0.156	1.107	1.066	1.066	0.556	1.332	1.165	0.554	1.001	0.909	1.058	0.987	0.832	0.134	0.123	0.162				0.589	0.988	0.702	0.732	1.085	0.794	0.785	1.227		1.34	0.892	1.058	1.058	0.987	0.832	0.134	0.123	0.162
								44	0.126	0.122	0.156	1.109	1.064	1.064	0.556	1.332	1.168	0.553	1	0.909	1.057	0.986	0.834	0.134	0.123	0.162			44	0.59	0.991	0.703	0.733	1.086	0.793	0.784	1.227		1.34	0.89	1.057	1.057	0.986	0.834	0.134	0.123	0.162
									0.126	0.122	0.156	1.112	1.063	1.063	0.556	1.332	1.168	0.553	1.002	0.909	1.057	0.986	0.833	0.134	0.123	0.162				0.59	0.991	0.704	0.734	1.086	0.793	0.781	1.229		1.341	0.891	1.058	1.057	0.986	0.833	0.134	0.123	0.162
									0.126	0.122	0.156	1.114	1.061	1.061	0.556	1.33	1.165	0.552	1.001	0.907	1.057	0.986	0.834	0.134	0.123	0.162				0.591	0.987	0.705	0.735	1.083	0.792	0.781	1.228		1.344	0.891	1.059	1.057	0.986	0.834	0.134	0.123	0.162
									0.126	0.123	0.156	1.116	1.062	1.062	0.555	1.328	1.164	0.551	0.998	0.905	1.057	0.986	0.834	0.134	0.123	0.162				0.592	0.984	0.705	0.737	1.08	0.792	0.78	1.227		1.346	0.891	1.06	1.057	0.986	0.834	0.134	0.123	0.162
									0.126	0.123	0.156	1.115	1.064	1.064	0.555	1.327	1.161	0.549	0.996	0.902	1.057	0.986	0.834	0.134	0.123	0.162				0.593	0.982	0.704	0.739	1.079	0.792	0.779	1.226		1.349	0.891	1.062	1.057	0.986	0.834	0.134	0.123	0.162
									0.126	0.122	0.155	1.115	1.062	1.062	0.555	1.324	1.159	0.548	0.997	0.901	1.056	0.986	0.834	0.134	0.123	0.162				0.593	0.983	0.703	0.742	1.078	0.793	0.777	1.225		1.35	0.892	1.064	1.056	0.986	0.834	0.134	0.123	0.162
									0.126	0.123	0.155	1.115	1.06	1.06	0.555	1.323	1.156	0.548	0.997	0.9	1.057	0.986	0.834	0.134	0.123	0.162				0.594	0.983	0.703	0.746	1.077	0.794	0.777	1.225		1.35	0.894	1.064	1.057	0.986	0.834	0.134	0.123	0.162
									0.126	0.123	0.155	1.115	1.059	1.059	0.554	1.321	1.153	0.548	0.997	0.9	1.056	0.987	0.835	0.134	0.123	0.162				0.595	0.983	0.703	0.748	1.077	0.794	0.776	1.224		1.354	0.895	1.063	1.056	0.987	0.835	0.134	0.123	0.162
									0.126	0.123	0.155	1.116	1.057	1.057	0.554	1.322	1.155	0.547	0.996	0.9	1.055	0.987	0.836	0.134	0.123	0.162				0.597	0.985	0.704	0.749	1.076	0.795	0.776	1.226		1.357	0.893	1.063	1.055	0.987	0.836	0.134	0.123	0.162
									0.126	0.123	0.155	1.118	1.056	1.056	0.553	1.321	1.157	0.545	0.995	0.899	1.055	0.987	0.835	0.134	0.123	0.162				0.597	0.985	0.705	0.751	1.077	0.793	0.774	1.225		1.359	0.892	1.064	1.055	0.987	0.835	0.134	0.123	0.162
									0.126	0.123	0.155	1.12	1.055	1.055	0.553	1.318	1.157	0.544	0.994	0.901	1.054	0.986	0.834	0.134	0.123	0.162				0.599	0.985	0.705	0.753	1.074	0.792	0.773	1.224		1.36	0.891	1.064	1.054	0.986	0.834	0.134	0.123	0.162
									0.126	0.123	0.155	1.121	1.055	1.055	0.553	1.318	1.154	0.544	0.993	0.901	1.054	0.986	0.833	0.134	0.123	0.162				0.6	0.986	0.705	0.754	1.074	0.792	0.772	1.223		1.359	0.891	1.065	1.054	0.986	0.833	0.134	0.123	0.162
									0.126	0.123	0.155	1.123	1.054	1.054	0.553	1.317	1.152	0.542	0.992	0.903	1.055	0.986	0.832	0.134	0.123	0.162				0.601	0.987	0.707	0.755	1.074	0.791	0.772	1.222		1.363	0.89	1.066	1.055	0.986	0.832	0.134	0.123	0.162
									0.126	0.123	0.155	1.123	1.055	1.055	0.553	1.319	1.15	0.541	0.99	0.902	1.054	0.986	0.831	0.134	0.123	0.162				0.602	0.988	0.707	0.756	1.073	0.791	0.77	1.222		1.365	0.891	1.068	1.054	0.986	0.831	0.134	0.123	0.162
									0.126	0.123	0.155	1.124	1.054	1.054	0.553	1.317	1.148	0.541	0.99	0.904	1.053	0.986	0.83	0.134	0.123	0.162				0.603	0.989	0.708	0.758	1.072	0.792	0.769	1.223		1.367	0.892	1.069	1.053	0.986	0.83	0.134	0.123	0.162
									0.126	0.123	0.155	1.127	1.054	1.054	0.553	1.318	1.147	0.54	0.989	0.907	1.053	0.987	0.829	0.134	0.123	0.162				0.604	0.99	0.707	0.761	1.069	0.793	0.769	1.221		1.371	0.892	1.069	1.053	0.987	0.829	0.134	0.123	0.162
									0.126	0.123	0.155	1.131	1.056	1.056	0.553	1.316	1.147	0.54	0.988	0.909	1.053	0.987	0.83	0.134	0.123	0.162				0.606	0.991	0.706	0.761	1.066	0.792	0.767	1.221		1.372	0.891	1.07	1.053	0.987	0.83	0.134	0.123	0.162
									0.126	0.123	0.155	1.133	1.056	1.056	0.553	1.317	1.142	0.539	0.988	0.91	1.052	0.987	0.831	0.134	0.123	0.162				0.608	0.993	0.706	0.764	1.064	0.791	0.767	1.222		1.371	0.891	1.071	1.052	0.987	0.831	0.134	0.123	0.162
									0.126	0.123	0.155	1.135	1.054	1.054	0.554	1.316	1.141	0.539	0.987	0.912	1.052	0.987	0.83	0.134	0.123	0.162				0.61	0.995	0.706	0.766	1.062	0.791	0.766	1.222		1.371	0.891	1.072	1.052	0.987	0.83	0.134	0.123	0.162
									0.126	0.123	0.155	1.138	1.051	1.051	0.555	1.314	1.14	0.54	0.985	0.914	1.051	0.987	0.83	0.134	0.123	0.162				0.612	0.994	0.706	0.768	1.061	0.793	0.766	1.219		1.368	0.892	1.073	1.051	0.987	0.83	0.134	0.123	0.162
									0.126	0.123	0.155	1.143	1.05	1.05	0.555	1.313	1.139	0.539	0.987	0.914	1.051	0.987	0.831	0.134	0.123	0.162				0.614	0.993	0.707	0.769	1.062	0.793	0.765	1.22		1.368	0.893	1.075	1.051	0.987	0.831	0.134	0.123	0.162
[truncated: 568 more rows]
[truncated: 35 more columns]

## Sheet: Figure S2
							Figure S2	IL-1α (pg/mL)			Control						Meropenem								Phages							Combination
[truncated: 23 more rows]

[truncated: 6 more sheets: Figure S3, Figure S4, Figure S5, Figure S6, Figure S7, Figure S8]
